# Supplementary material for: Genetic and environmental regulation of caudate nucleus transcriptome: insight into schizophrenia risk and the dopamine system
Source: medRxiv preprint, doi:10.1101/2020.11.18.20230540, version 2 (2021-04-29)
Supplement: Data S6 [file 230540_file08.gz]

Archive with 69 entries (68 files):
- supplemental_data_s6
- supplemental_data_s6/module7_go_enrichment.tsv
- supplemental_data_s6/module14_go_wordcloud.png
- supplemental_data_s6/module9_go_enrichment.pdf
- supplemental_data_s6/module12_go_enrichment.tsv
- supplemental_data_s6/module3_go_wordcloud.png
- supplemental_data_s6/module12_go_enrichment.pdf
- supplemental_data_s6/module0_go_enrichment.pdf
- supplemental_data_s6/module0_genes.csv
- supplemental_data_s6/module14_go_enrichment.tsv
- supplemental_data_s6/module14_go_enrichment.pdf
- supplemental_data_s6/module5_go_enrichment.tsv
- supplemental_data_s6/module6_go_wordcloud.png
- supplemental_data_s6/module10_genes.csv
- supplemental_data_s6/module4_go_enrichment.pdf
- supplemental_data_s6/module8_genes.csv
- supplemental_data_s6/module7_go_enrichment.pdf
- supplemental_data_s6/module4_genes.csv
- supplemental_data_s6/module19_genes.csv
- supplemental_data_s6/module12_genes.csv
- supplemental_data_s6/module6_go_enrichment.tsv
- supplemental_data_s6/module4_go_wordcloud.png
- supplemental_data_s6/module5_go_enrichment.pdf
- supplemental_data_s6/module13_go_wordcloud.png
- supplemental_data_s6/module13_go_enrichment.pdf
- supplemental_data_s6/module19_go_enrichment.tsv
- supplemental_data_s6/latent_variables.csv
- supplemental_data_s6/module6_go_enrichment.pdf
- supplemental_data_s6/module1_go_enrichment.pdf
- supplemental_data_s6/module15_genes.csv
- supplemental_data_s6/module2_go_enrichment.tsv
- supplemental_data_s6/module3_go_enrichment.pdf
- supplemental_data_s6/module1_genes.csv
- supplemental_data_s6/module3_go_enrichment.tsv
- supplemental_data_s6/module13_genes.csv
- supplemental_data_s6/module1_go_enrichment.tsv
- supplemental_data_s6/module6_genes.csv
- supplemental_data_s6/module5_genes.csv
- supplemental_data_s6/module11_go_wordcloud.png
- supplemental_data_s6/module0_go_wordcloud.png
- supplemental_data_s6/module7_genes.csv
- supplemental_data_s6/module1_go_wordcloud.png
- supplemental_data_s6/module13_go_enrichment.tsv
- supplemental_data_s6/module19_go_enrichment.pdf
- supplemental_data_s6/module11_go_enrichment.pdf
- supplemental_data_s6/module17_genes.csv
- supplemental_data_s6/module2_go_wordcloud.png
- supplemental_data_s6/module_enrichment.csv
- supplemental_data_s6/module2_genes.csv
- supplemental_data_s6/module11_genes.csv
- supplemental_data_s6/module9_go_enrichment.tsv
- supplemental_data_s6/module16_go_wordcloud.png
- supplemental_data_s6/module14_genes.csv
- supplemental_data_s6/module4_go_enrichment.tsv
- supplemental_data_s6/module_enrichment_excluding_mhc_region.csv
- supplemental_data_s6/module16_genes.csv
- supplemental_data_s6/module11_go_enrichment.tsv
- supplemental_data_s6/module12_go_wordcloud.png
- supplemental_data_s6/module3_genes.csv
- supplemental_data_s6/module16_go_enrichment.pdf
- supplemental_data_s6/module9_go_wordcloud.png
- supplemental_data_s6/module9_genes.csv
- supplemental_data_s6/module5_go_wordcloud.png
- supplemental_data_s6/module0_go_enrichment.tsv
- supplemental_data_s6/module18_genes.csv
- supplemental_data_s6/module2_go_enrichment.pdf
- supplemental_data_s6/module16_go_enrichment.tsv
- supplemental_data_s6/module19_go_wordcloud.png
- supplemental_data_s6/module7_go_wordcloud.png
