# Supplementary material for: Genetic and environmental regulation of caudate nucleus transcriptome: insight into schizophrenia risk and the dopamine system
Source: medRxiv preprint, doi:10.1101/2020.11.18.20230540, version 2 (2021-04-29)
Supplement: Data S6 [file 230540_file08.gz › supplemental_data_s6/latent_variables.csv]

	mu0	mu1	mu2	mu3	mu4	mu5	mu6	mu7	lv0	lv1	lv2	lv3	lv4	lv5	lv6	lv7
chr11:113412884-113415420(-)	-1.3523614406585693	0.4683353006839752	-1.178439974784851	-0.13127568364143372	2.165534734725952	-0.08857067674398422	3.4433679580688477	-0.27238360047340393	-2.466629981994629	-1.390660285949707	-1.8095722198486328	-3.2587339878082275	-3.301483631134033	-5.451273441314697	-5.773639678955078	-2.444016456604004
chr11:113414462-113415420(-)	-1.5646473169326782	1.0949984788894653	-1.3892515897750854	0.14045795798301697	1.1684672832489014	-0.12084611505270004	7.543372631072998	-1.395110011100769	-2.763654947280884	-3.1540281772613525	-2.277834892272949	-4.609555244445801	-5.989344596862793	-5.903626441955566	-7.705121994018555	-3.346411943435669
chr11:113412884-113414374(-)	-1.1566697359085083	0.4894010126590729	-0.4770355820655823	0.13142552971839905	1.1496495008468628	0.4467279016971588	7.276638507843018	-1.2519530057907104	-1.9829118251800537	-2.369898796081543	-1.7406543493270874	-3.2722339630126953	-4.453210353851318	-4.622924327850342	-5.325160026550293	-2.4259421825408936
ENSG00000227232.5	-0.34550732374191284	-0.39973124861717224	-0.6275031566619873	-0.13042834401130676	-0.7714695334434509	-0.365876704454422	2.1359238624572754	0.6757736206054688	-3.3606467247009277	-2.882035970687866	-2.644223213195801	-4.254666805267334	-5.069042205810547	-6.480809211730957	-7.627959728240967	-3.217420816421509
ENSG00000278267.1	-0.6093030571937561	-0.9418054819107056	-3.1339340209960938	1.7010706663131714	-1.959699273109436	-0.41591736674308777	1.9740535020828247	-1.06644868850708	-4.310304641723633	-3.496293067932129	-3.42767333984375	-4.829858303070068	-6.058887481689453	-8.636099815368652	-10.09836196899414	-3.1130213737487793
ENSG00000268903.1	-0.30391842126846313	-0.5435588955879211	-0.22242581844329834	0.12993870675563812	-0.36473900079727173	0.10138227045536041	0.02571442723274231	-0.22808362543582916	-3.121960401535034	-2.143254280090332	-2.4514055252075195	-3.3003814220428467	-4.583930969238281	-5.048827171325684	-6.946991443634033	-3.2192130088806152
ENSG00000269981.1	-0.6417529582977295	-1.7587567567825317	-0.41554513573646545	0.49415525794029236	-0.6980485916137695	0.20883992314338684	0.5373715162277222	-0.005038082599639893	-3.2533066272735596	-2.174959182739258	-3.1169071197509766	-3.4717888832092285	-5.209291458129883	-4.89308500289917	-7.2461066246032715	-3.136193037033081
ENSG00000279457.3	0.11046566069126129	-0.3975315988063812	-1.1852055788040161	-0.034822940826416016	-1.0918195247650146	-0.20319637656211853	1.8913285732269287	-0.4121221601963043	-4.910830974578857	-3.4531302452087402	-3.2533211708068848	-4.8643012046813965	-6.091283798217773	-6.3157429695129395	-9.318806648254395	-3.367413282394409
ENSG00000228463.9	0.20174600183963776	-0.2780422270298004	-0.133389413356781	-0.5132150650024414	-0.06878103315830231	0.7499067187309265	1.019235372543335	0.11866730451583862	-3.8420042991638184	-2.4384360313415527	-3.3748159408569336	-3.789669990539551	-5.617938995361328	-6.323387145996094	-8.116405487060547	-3.732611656188965
ENSG00000236679.2	-0.4165216088294983	-0.08516833186149597	0.763477087020874	0.4936698377132416	-0.3684394359588623	0.4598943293094635	2.048931121826172	1.187214732170105	-4.576403617858887	-2.283658504486084	-2.9485135078430176	-3.6352293491363525	-4.89523983001709	-6.0723371505737305	-7.878952503204346	-2.751447916030884
ENSG00000225972.1	0.2663153409957886	6.366290092468262	6.5613203048706055	-0.43559005856513977	1.1449552774429321	1.6803364753723145	3.9358065128326416	4.787795066833496	-4.075586318969727	-5.353249549865723	-5.334305763244629	-6.712192535400391	-10.45036506652832	-11.264801979064941	-15.319049835205078	-5.253849029541016
ENSG00000225630.1	2.6622865200042725	-1.3501032590866089	0.7616724371910095	0.30019083619117737	-2.016850709915161	0.8434998393058777	7.319672107696533	-1.5282272100448608	-1.6227738857269287	-2.815624713897705	-2.573620319366455	-3.195857048034668	-4.334776401519775	-4.569942951202393	-7.013184547424316	-2.3710289001464844
ENSG00000237973.1	2.0133914947509766	3.3033835887908936	1.4205442667007446	0.11237350106239319	-0.4123745560646057	-0.2175799310207367	7.825964450836182	3.135366439819336	-4.088690280914307	-4.803994655609131	-2.601264476776123	-4.312510967254639	-7.11444091796875	-6.619112968444824	-6.404060363769531	-1.8064279556274414
ENSG00000278791.1	-0.8457421064376831	4.916761875152588	3.252490520477295	-1.1489673852920532	0.48238688707351685	0.541431725025177	1.4091086387634277	3.540729284286499	-6.114068984985352	-6.531497955322266	-5.368711471557617	-8.135165214538574	-11.691397666931152	-12.76510238647461	-15.533763885498047	-5.846185207366943
ENSG00000229344.1	0.9905987977981567	-0.2921994626522064	-0.2778567671775818	3.3876829147338867	-0.03701029717922211	-1.1881005764007568	2.4855825901031494	-0.9788376092910767	-2.842663526535034	-2.935056209564209	-3.2546229362487793	-5.2485432624816895	-4.313601493835449	-8.798734664916992	-8.45812702178955	-3.551368236541748
ENSG00000248527.1	1.8261483907699585	0.7868973016738892	1.3506485223770142	0.710849404335022	-1.717508316040039	0.6398798823356628	9.53945541381836	-1.2064059972763062	-0.05120974779129028	-1.2824798822402954	-1.8962293863296509	-1.3135051727294922	-2.637451171875	-4.520015716552734	-4.188273906707764	-1.932239055633545
ENSG00000198744.5	2.0336663722991943	-0.7033568620681763	-0.999181866645813	1.0848814249038696	-0.6267340779304504	-1.7433816194534302	2.270913600921631	-2.5396673679351807	-2.5552942752838135	-0.9465014934539795	-4.282818794250488	-4.755110740661621	-4.710104942321777	-8.2611665725708	-9.969916343688965	-3.3759069442749023
ENSG00000228327.3	-0.22864539921283722	-0.13853511214256287	-0.5276196599006653	0.051475927233695984	-0.8264198899269104	0.4608234465122223	0.7236391305923462	-0.273278146982193	-3.7339389324188232	-2.639735221862793	-3.060629367828369	-4.368618011474609	-5.2610626220703125	-6.081737995147705	-8.448561668395996	-3.499871253967285
ENSG00000223181.1	0.03797997161746025	-0.060111019760370255	-1.7043160200119019	-0.1979295015335083	-0.48699265718460083	0.010448969900608063	0.16107113659381866	-0.9789079427719116	-3.0917794704437256	-2.6973133087158203	-2.819161891937256	-3.4695565700531006	-4.9052276611328125	-5.026036262512207	-7.523195743560791	-3.846668004989624
ENSG00000237491.8	-0.8278269171714783	-0.17404380440711975	-0.1950380802154541	0.1488358974456787	-0.10091577470302582	0.7867700457572937	0.9487466812133789	-0.3229779303073883	-3.4770801067352295	-2.2598044872283936	-2.8461484909057617	-4.1420135498046875	-5.371059417724609	-5.993511199951172	-8.423593521118164	-3.4036543369293213
ENSG00000230092.7	0.5394941568374634	-1.3646265268325806	-0.5154716968536377	-0.8622353076934814	-0.6584997773170471	0.14609280228614807	3.6104745864868164	-0.6542178392410278	-3.7235798835754395	-3.2260384559631348	-3.4545044898986816	-4.941825866699219	-5.754938125610352	-7.023526668548584	-8.98300838470459	-3.6438450813293457
ENSG00000228794.8	-0.42858052253723145	0.05815329775214195	0.10717486590147018	-0.1880762279033661	0.8608084917068481	-0.07337018102407455	2.80008602142334	0.3776256740093231	-3.497039556503296	-2.876563787460327	-2.782226085662842	-3.808091640472412	-4.792279243469238	-6.137613296508789	-7.248119354248047	-3.3184783458709717
ENSG00000225880.5	-0.5726385116577148	-0.20156356692314148	-0.4588785469532013	0.12228794395923615	-0.9554410576820374	0.35686948895454407	1.2148953676223755	0.16327711939811707	-4.059268951416016	-2.571167230606079	-3.2868881225585938	-4.322243690490723	-5.695439338684082	-6.544692039489746	-8.693451881408691	-2.9056079387664795
ENSG00000272438.1	-0.27714505791664124	-0.27560117840766907	-0.27658990025520325	-0.13477560877799988	0.02538570761680603	0.07383158057928085	0.34179621934890747	0.03918763995170593	-3.9161665439605713	-2.949084758758545	-3.0600314140319824	-4.416293144226074	-5.112401008605957	-5.598486423492432	-8.135814666748047	-3.0261523723602295
ENSG00000230699.2	-0.22954969108104706	-0.11453589797019958	-0.3771284818649292	-0.021473810076713562	-0.036771342158317566	0.13403958082199097	0.176193505525589	-0.236209899187088	-3.418375015258789	-2.4490249156951904	-2.8346920013427734	-3.9371206760406494	-4.879302024841309	-5.391931533813477	-7.504218578338623	-3.1526083946228027
ENSG00000223764.2	-0.3112017512321472	0.4410841166973114	-0.47250068187713623	-0.4642016887664795	-0.7296558022499084	-0.2592369019985199	0.051293596625328064	-0.39801955223083496	-3.1645476818084717	-2.4741225242614746	-3.1136856079101562	-4.005186080932617	-5.045724868774414	-5.307764053344727	-7.399933815002441	-3.3576488494873047
ENSG00000187634.11	-0.6273069381713867	-0.2596835196018219	-0.5664829611778259	0.061426013708114624	-1.0376776456832886	-0.64206463098526	0.6623055338859558	-0.9073822498321533	-4.333116054534912	-3.1097190380096436	-3.3199143409729004	-5.060530185699463	-5.719103813171387	-6.338326930999756	-8.802112579345703	-3.5525574684143066
ENSG00000188976.10	-0.8923535346984863	0.45924273133277893	-0.141401469707489	0.855317234992981	-0.37206047773361206	-1.486252784729004	3.5010757446289062	0.11518177390098572	-4.1635355949401855	-3.2888259887695312	-3.7255020141601562	-4.796108245849609	-5.766297340393066	-6.771856307983398	-8.174053192138672	-3.7311291694641113
ENSG00000187961.13	-0.46500056982040405	0.13110783696174622	-0.30914929509162903	1.1613394021987915	-0.14405281841754913	-0.19980522990226746	1.0393469333648682	-0.7613743543624878	-3.826052665710449	-2.5755913257598877	-3.1199450492858887	-4.013007640838623	-5.018510818481445	-5.699804306030273	-7.267114162445068	-3.0454866886138916
ENSG00000272512.1	0.31685179471969604	0.12048140168190002	0.6630250215530396	1.0538054704666138	-0.9757776856422424	0.5239900946617126	1.0668485164642334	-1.2606173753738403	-3.4666926860809326	-2.6412289142608643	-3.1695337295532227	-4.667977809906006	-5.479135513305664	-5.770331382751465	-8.309931755065918	-3.5859057903289795
ENSG00000188290.10	1.4267853498458862	-0.24964365363121033	-1.2466896772384644	2.4139626026153564	0.31066930294036865	-1.3587720394134521	2.749342918395996	-1.1030763387680054	-3.85622501373291	-3.612386703491211	-2.913881778717041	-4.804790496826172	-5.689300537109375	-7.155764579772949	-7.554236888885498	-3.634139060974121
ENSG00000187608.8	1.0948398113250732	1.282364010810852	0.2638065218925476	1.5633116960525513	-1.1507364511489868	-1.688145399093628	3.226297378540039	-0.045040518045425415	-3.4876391887664795	-4.377201080322266	-3.874697208404541	-5.583034992218018	-6.892119407653809	-7.097830772399902	-7.608465671539307	-4.3615403175354
ENSG00000188157.13	0.9017341136932373	0.9114313125610352	-1.478032112121582	1.598227858543396	-1.5322932004928589	0.1344607174396515	2.99111270904541	-0.903781533241272	-4.026438236236572	-2.638915538787842	-3.2104663848876953	-4.638215065002441	-5.256555557250977	-6.286300182342529	-7.1605024337768555	-3.316941499710083
ENSG00000217801.9	-0.32995712757110596	-0.27932485938072205	-0.33435332775115967	0.0935353934764862	0.08781497180461884	0.16543981432914734	0.6407034993171692	-0.2189830243587494	-4.011971473693848	-2.858792304992676	-2.946625232696533	-4.405282497406006	-5.395420074462891	-5.944824695587158	-7.82287073135376	-3.262444496154785
ENSG00000131591.17	0.29974162578582764	0.020844127982854843	-1.0969836711883545	0.5334441661834717	-0.8937696814537048	0.6140488386154175	1.5096373558044434	-0.500667929649353	-3.9690747261047363	-2.6096928119659424	-3.0359230041503906	-4.260870933532715	-5.56379508972168	-6.235049247741699	-8.156804084777832	-3.5615170001983643
ENSG00000078808.16	-0.12739859521389008	-0.11418899893760681	0.01454048603773117	1.0466026067733765	-1.4336966276168823	-0.6767399907112122	3.6108899116516113	-0.06906405091285706	-3.785684585571289	-3.2230513095855713	-3.522245407104492	-4.483471393585205	-5.612971305847168	-6.215497970581055	-7.768881797790527	-3.543715238571167
ENSG00000176022.4	0.06566597521305084	0.6859637498855591	-0.7419604659080505	0.16683897376060486	0.06489337980747223	-0.9583641886711121	2.4833016395568848	0.08355244994163513	-4.122010231018066	-3.126276969909668	-3.5528345108032227	-4.595242977142334	-5.566722869873047	-6.466581344604492	-7.956787586212158	-3.5211987495422363
ENSG00000260179.1	-0.26010042428970337	-0.23414725065231323	-0.21026873588562012	0.284793883562088	-0.2817419171333313	0.2268996238708496	0.09501619637012482	-0.3168509006500244	-3.5562386512756348	-2.470649242401123	-3.0569310188293457	-4.000921249389648	-4.964787483215332	-5.534794330596924	-7.895030498504639	-3.6756744384765625
ENSG00000160087.20	-0.4117717742919922	-0.27381429076194763	-0.11227411776781082	0.7163838148117065	-0.787148654460907	-0.21889224648475647	2.572679042816162	-0.679439902305603	-3.8306734561920166	-2.9485836029052734	-3.436448574066162	-4.549339771270752	-5.582974433898926	-6.2580885887146	-7.816333293914795	-3.685288667678833
ENSG00000230415.1	0.1610499769449234	0.2119523584842682	-1.6420228481292725	0.910916805267334	-1.3611226081848145	0.5260040163993835	2.225684642791748	-0.6896560192108154	-4.004128932952881	-2.9065966606140137	-3.384150981903076	-4.6577324867248535	-6.15853214263916	-6.919729709625244	-9.81021785736084	-4.084897041320801
ENSG00000162572.19	0.35692930221557617	-0.23591920733451843	-1.303024172782898	0.8957720994949341	-1.660756230354309	0.855135440826416	1.915334701538086	-0.6365690231323242	-4.2333903312683105	-2.657581090927124	-3.296517848968506	-4.275180339813232	-5.886909484863281	-6.4231791496276855	-8.893746376037598	-3.778850793838501
ENSG00000131584.18	0.6573714017868042	-0.5151704549789429	-1.7211546897888184	1.3734357357025146	-1.3961957693099976	0.38842692971229553	5.072771072387695	-0.7923208475112915	-4.111870288848877	-3.1994516849517822	-3.3940720558166504	-5.029992580413818	-6.236327171325684	-6.858637809753418	-8.995794296264648	-4.043715953826904
ENSG00000169972.11	0.03515608236193657	0.10192909836769104	-0.753120481967926	0.5209337472915649	-0.6474137306213379	-0.5708386898040771	1.2486287355422974	-0.7840002775192261	-4.065834999084473	-3.101180076599121	-3.253042697906494	-4.627896308898926	-5.373419761657715	-6.359442710876465	-7.624430179595947	-3.359008312225342
ENSG00000127054.19	-0.4815412759780884	-0.33599528670310974	-0.8850913643836975	0.7534807920455933	-1.5445600748062134	-0.3071283996105194	2.8416907787323	-0.044355541467666626	-4.109509468078613	-3.040996789932251	-3.5454611778259277	-4.719003677368164	-5.986817359924316	-6.75529670715332	-8.683035850524902	-3.84505033493042
ENSG00000240731.1	-1.1044707298278809	-0.48454245924949646	-1.6156927347183228	0.540142297744751	-2.4742729663848877	0.6912391185760498	2.3749799728393555	-0.67402184009552	-3.6220343112945557	-2.027827501296997	-2.9817605018615723	-4.4459099769592285	-5.037038803100586	-6.8134074211120605	-7.909318923950195	-3.4890520572662354
ENSG00000224051.6	0.6118314862251282	0.3255845606327057	-0.04241395741701126	1.2254509925842285	-0.6091030240058899	-0.5479110479354858	2.301262378692627	-0.550021767616272	-3.815048933029175	-3.080097198486328	-3.307957649230957	-4.4182634353637695	-5.214692115783691	-6.153670787811279	-7.606977462768555	-3.4887585639953613
ENSG00000107404.18	1.1464632749557495	-0.7536224126815796	-0.6031467318534851	1.4610906839370728	-0.8908138871192932	-0.6674856543540955	5.222866058349609	-0.7651528120040894	-4.2015204429626465	-3.526968002319336	-3.6971559524536133	-4.959133625030518	-6.052018165588379	-6.827641010284424	-8.361680030822754	-3.745076894760132
ENSG00000162576.16	0.2127610296010971	0.3654344379901886	1.0798300504684448	0.2442338764667511	-1.4981807470321655	-0.37631282210350037	1.3282454013824463	-0.6372132301330566	-3.6119706630706787	-3.2560367584228516	-3.562675952911377	-4.716192722320557	-6.0583086013793945	-6.745042324066162	-8.141546249389648	-3.985670328140259
ENSG00000175756.13	0.43300366401672363	-0.3809536397457123	-0.6171006560325623	0.9651755094528198	-0.27765828371047974	-1.7553383111953735	4.496830940246582	-0.6665216684341431	-3.7579567432403564	-3.0509884357452393	-3.142824649810791	-4.128286838531494	-5.3562164306640625	-5.978073596954346	-7.486236572265625	-3.1630656719207764
ENSG00000221978.11	-0.5149190425872803	-0.5283817052841187	-1.3558387756347656	0.14898023009300232	-2.1834566593170166	0.5807023644447327	3.8134970664978027	-0.1100250780582428	-4.3803391456604	-2.923330307006836	-3.4901294708251953	-4.757262706756592	-6.1060991287231445	-7.023830413818359	-8.92820930480957	-3.8012337684631348
ENSG00000224870.6	0.7640736103057861	0.18818703293800354	-0.9771031737327576	0.21950200200080872	-1.19925856590271	-1.0620875358581543	2.8777713775634766	-0.07589855790138245	-3.810171604156494	-3.427201986312866	-3.7794299125671387	-4.9692206382751465	-5.822957992553711	-6.615942478179932	-8.345504760742188	-3.8905036449432373
ENSG00000242485.5	0.12493278086185455	-0.5703548192977905	-0.3839642405509949	-0.03257670998573303	-0.14344973862171173	-2.0432004928588867	4.092486381530762	-0.22308936715126038	-3.491567850112915	-3.195183753967285	-3.288930892944336	-4.084465026855469	-5.552910804748535	-6.268983364105225	-7.741189956665039	-3.3068649768829346
ENSG00000272455.1	-0.5737797021865845	-0.49864843487739563	-0.22680151462554932	0.0191013365983963	-0.7330343723297119	0.4421449303627014	1.235644817352295	-0.3535706102848053	-3.924720525741577	-3.166771650314331	-3.7982678413391113	-4.740586757659912	-5.904616355895996	-6.815127849578857	-8.014928817749023	-4.009872913360596
ENSG00000235098.8	-0.499761164188385	-0.3810330331325531	-0.7659807205200195	-0.13560906052589417	-2.1654887199401855	-1.1014362573623657	1.9030003547668457	0.8387552499771118	-3.9832651615142822	-3.4292452335357666	-3.9892024993896484	-4.457448959350586	-6.219230651855469	-6.429959297180176	-8.762045860290527	-4.150096416473389
ENSG00000225905.1	-0.3959878981113434	-0.09307143092155457	-1.0425498485565186	-1.0139681100845337	-0.7268086075782776	-0.2795208692550659	0.45881912112236023	-0.34362486004829407	-4.342987537384033	-2.7513222694396973	-3.5831031799316406	-4.53140926361084	-6.0557661056518555	-6.7178144454956055	-9.272689819335938	-4.055699825286865
ENSG00000205116.3	-0.25177741050720215	0.8178198337554932	-2.905369520187378	0.9413682222366333	-2.9632725715637207	-1.7599319219589233	0.9141764044761658	-0.15196850895881653	-3.5212509632110596	-2.531376361846924	-3.8176722526550293	-4.402383327484131	-6.042184829711914	-6.342901229858398	-8.273494720458984	-4.201974391937256
ENSG00000225285.1	0.31466346979141235	-0.38230082392692566	-0.4423562288284302	0.0377943217754364	-0.9492823481559753	-0.24074211716651917	0.5595072507858276	0.4820152223110199	-3.559192180633545	-2.946113109588623	-3.1633973121643066	-4.448952674865723	-5.761130332946777	-5.865386009216309	-8.009236335754395	-3.6970067024230957
ENSG00000179403.11	-0.6812571287155151	0.5292264223098755	-1.2318872213363647	0.9489462375640869	-2.933917760848999	-2.342092990875244	2.7182095050811768	0.40937361121177673	-3.3420393466949463	-3.251251220703125	-4.159954071044922	-4.537327766418457	-6.172523498535156	-6.49921989440918	-7.388443470001221	-4.016456127166748
ENSG00000215915.9	-0.7909775972366333	-0.6297009587287903	-0.3752128481864929	0.5837280750274658	-0.8372421860694885	0.08642122894525528	0.34924250841140747	-0.5892897844314575	-3.4318411350250244	-2.709829330444336	-2.9584197998046875	-4.166681289672852	-4.749104022979736	-5.201362133026123	-7.004368305206299	-3.181488275527954
ENSG00000160072.19	-0.207866832613945	-0.904022216796875	-0.880967378616333	-0.09246715903282166	-1.0718004703521729	0.13656094670295715	1.6223242282867432	-0.8218744993209839	-4.3968505859375	-2.899430513381958	-3.4549522399902344	-4.687900543212891	-6.030920028686523	-6.722352027893066	-8.970280647277832	-3.943678140640259
ENSG00000197785.13	0.05789298936724663	0.16093960404396057	-0.6349368095397949	0.6935455799102783	-0.6793942451477051	-0.530765175819397	1.866025686264038	-0.35193803906440735	-4.058525562286377	-3.1670024394989014	-3.2114453315734863	-4.74142599105835	-5.372475624084473	-6.116328239440918	-7.83416748046875	-3.3707714080810547
ENSG00000205090.8	0.03178359195590019	0.1827179491519928	-0.9787718057632446	1.4205193519592285	0.5615023374557495	-0.7037447094917297	2.5935277938842773	-1.017189621925354	-3.932983636856079	-3.4158830642700195	-3.252333164215088	-4.672095775604248	-5.5923919677734375	-6.502931594848633	-8.129761695861816	-3.987419366836548
ENSG00000160075.11	-0.06324301660060883	-0.6865476369857788	-0.18056601285934448	0.5386987924575806	-0.028706029057502747	-1.1155306100845337	3.8207459449768066	-0.173854261636734	-3.6701459884643555	-3.0359740257263184	-3.240140438079834	-4.381023406982422	-5.449858665466309	-6.093254566192627	-7.703390121459961	-3.336840867996216
ENSG00000215014.4	-0.37400221824645996	-0.15131160616874695	-0.31755998730659485	-0.23090755939483643	0.0336289256811142	-0.3255694806575775	0.6941972374916077	-0.1316363513469696	-3.247894525527954	-3.148052453994751	-3.0452957153320312	-4.405239105224609	-5.170049667358398	-5.512824058532715	-7.970452785491943	-3.3223283290863037
ENSG00000228594.3	1.1977851390838623	-0.39907822012901306	-0.18111300468444824	0.6882498264312744	0.34062567353248596	0.23331382870674133	2.579831123352051	-0.29995492100715637	-3.3848040103912354	-2.819732189178467	-3.1850686073303223	-4.059110164642334	-4.993127822875977	-5.669973373413086	-7.4409003257751465	-3.4820027351379395
ENSG00000272106.1	0.4419964551925659	0.07080522179603577	-0.2649431824684143	0.16597691178321838	0.1538398712873459	-1.060691475868225	4.109657287597656	0.43046173453330994	-3.8273024559020996	-3.21327543258667	-3.6224589347839355	-4.173013687133789	-5.982651710510254	-6.643452167510986	-8.365137100219727	-3.7747013568878174
ENSG00000197530.12	0.47545433044433594	-0.2821517884731293	-0.6453039050102234	1.3412193059921265	-1.0637747049331665	0.17122378945350647	2.440237283706665	-0.6131105422973633	-4.130931377410889	-2.9688355922698975	-3.5032401084899902	-4.66066312789917	-5.679173469543457	-6.69296932220459	-8.502957344055176	-3.725470781326294
ENSG00000248333.8	-0.025890756398439407	0.1636303961277008	0.007731013000011444	0.5185915231704712	-1.185989260673523	-0.1641382873058319	2.969846248626709	-0.03125634789466858	-3.7234671115875244	-3.0282318592071533	-3.6224122047424316	-4.533340930938721	-5.481431007385254	-6.612817287445068	-8.176350593566895	-3.8295164108276367
ENSG00000272004.1	-0.5260840654373169	0.1647757589817047	-0.08728588372468948	-0.2375110536813736	-0.38398194313049316	-0.19497856497764587	0.3728097081184387	-0.6064890623092651	-4.055516242980957	-3.444742202758789	-4.0980329513549805	-5.84699821472168	-6.473056793212891	-7.471135139465332	-9.881383895874023	-4.618194580078125
ENSG00000189339.11	-0.04050349071621895	0.19217124581336975	-0.40284234285354614	0.10738196969032288	-0.9043833613395691	0.07423893362283707	3.8466405868530273	-0.4597379267215729	-4.108702659606934	-3.4730727672576904	-3.555014133453369	-5.027492523193359	-5.536235809326172	-6.602329254150391	-7.72387170791626	-3.7783875465393066
ENSG00000008128.22	-0.25556209683418274	-0.06543797254562378	-0.5336825251579285	0.1998235583305359	-0.5181977152824402	0.20816364884376526	0.33671215176582336	-0.05602338910102844	-3.3139257431030273	-2.519892454147339	-2.838169574737549	-3.6759610176086426	-4.829240798950195	-5.159979343414307	-7.262053966522217	-3.3848252296447754
ENSG00000268575.1	0.14415045082569122	-0.46312233805656433	-1.243011236190796	-0.010074853897094727	-0.009095251560211182	0.4465583860874176	1.7085497379302979	-0.8453443050384521	-3.8370490074157715	-3.0144383907318115	-3.2191896438598633	-4.407717227935791	-5.8801984786987305	-6.241811275482178	-8.711224555969238	-3.967801570892334
ENSG00000215790.6	0.4513716697692871	0.1982816755771637	-1.212323784828186	-0.16039803624153137	-0.18798331916332245	0.29503771662712097	2.4831109046936035	-0.7231879234313965	-3.6736552715301514	-2.52604603767395	-3.0842361450195312	-3.907878875732422	-5.003507614135742	-5.597831726074219	-6.971739768981934	-3.6404104232788086
ENSG00000008130.15	0.12136675417423248	0.22717085480690002	-0.40415579080581665	0.3927684724330902	-0.22829146683216095	-0.37084564566612244	3.240913152694702	-0.6419409513473511	-3.8694887161254883	-3.4494800567626953	-3.710361957550049	-4.685359477996826	-5.828120231628418	-6.480963706970215	-8.355020523071289	-4.109554767608643
ENSG00000078369.17	0.3144432306289673	-0.13253292441368103	-0.35206109285354614	-0.0919279158115387	-0.1529138833284378	-1.6100105047225952	7.976874828338623	-0.5424741506576538	-3.2707059383392334	-3.18149995803833	-3.050365924835205	-3.966494083404541	-5.345430374145508	-5.731645107269287	-6.929228782653809	-3.2136261463165283
ENSG00000231050.1	-0.4616950750350952	-0.22610828280448914	-0.5848426818847656	0.9520858526229858	-0.33371424674987793	0.17384591698646545	1.1248986721038818	-0.6054637432098389	-3.297215700149536	-3.040194272994995	-3.316682815551758	-4.21483850479126	-5.269661903381348	-6.191806793212891	-8.264744758605957	-3.663987874984741
ENSG00000169885.9	-0.24716715514659882	-0.26089078187942505	-0.15539002418518066	0.26027169823646545	-0.11216439306735992	0.5814879536628723	0.24524810910224915	-0.3001103401184082	-3.304227828979492	-2.33491587638855	-2.6052770614624023	-3.622338056564331	-4.901254653930664	-4.6898908615112305	-7.418007850646973	-3.1644339561462402
ENSG00000142609.17	0.15101094543933868	0.3399510085582733	-0.2471299171447754	-0.1717739999294281	-0.456379234790802	0.8899564146995544	1.0920476913452148	-1.381125569343567	-4.615557670593262	-2.839918375015259	-3.459869861602783	-4.629850387573242	-5.965719223022461	-7.101579666137695	-9.18411636352539	-3.8470616340637207
ENSG00000187730.7	-0.7717033624649048	0.9654451608657837	-0.7799312472343445	0.579495906829834	2.0815844535827637	-1.7330365180969238	5.870528221130371	-0.1728743612766266	-3.4048874378204346	-3.386582612991333	-3.027186393737793	-4.417270660400391	-5.528559684753418	-6.271109580993652	-7.817803859710693	-3.857407331466675
ENSG00000067606.16	0.04904450103640556	0.16600289940834045	-1.030705213546753	0.2940370738506317	0.4613809585571289	-0.7979815602302551	5.140981197357178	-0.1853746473789215	-3.467787981033325	-3.152156352996826	-3.1452159881591797	-4.321687698364258	-5.468880653381348	-6.074215888977051	-7.755605220794678	-3.3576695919036865
ENSG00000182873.5	-0.0891183465719223	-0.1697351634502411	0.14139407873153687	0.26322513818740845	-0.6921516060829163	0.056613482534885406	0.14347293972969055	-0.19960924983024597	-3.5044519901275635	-2.4476230144500732	-3.135791778564453	-3.8558294773101807	-4.761613368988037	-5.189768314361572	-7.276641845703125	-3.400254726409912
ENSG00000162585.16	-0.0036893077194690704	-0.20356401801109314	-0.2052992582321167	0.5823270082473755	-0.7782445549964905	-0.06430842727422714	0.6103233695030212	-0.7005782127380371	-3.36253023147583	-2.3812007904052734	-2.8335118293762207	-3.9419755935668945	-4.860176086425781	-5.4987921714782715	-7.14176607131958	-3.2219858169555664
ENSG00000234396.3	0.14947228133678436	0.44040340185165405	0.2475571632385254	0.2764362096786499	-0.17698903381824493	0.8243631720542908	0.2359548807144165	-0.5765422582626343	-3.6680054664611816	-2.5141372680664062	-3.061675548553467	-3.7796237468719482	-5.375438690185547	-5.025681495666504	-7.666731834411621	-3.0463461875915527
ENSG00000157933.9	-0.4551140069961548	-0.044002387672662735	-0.15655523538589478	1.5002762079238892	-1.2015081644058228	0.4082147181034088	4.6970319747924805	-1.022408366203308	-3.282989263534546	-2.3123538494110107	-3.1468825340270996	-4.041692733764648	-5.1738386154174805	-5.963807582855225	-7.2295050621032715	-3.392270803451538
ENSG00000116151.13	0.2450706511735916	0.10273829102516174	-0.4184455871582031	0.1394682228565216	-0.26617705821990967	0.5597572922706604	1.3746486902236938	-0.37190869450569153	-4.21546745300293	-3.147130250930786	-3.4415102005004883	-4.656794548034668	-5.910082817077637	-6.624177932739258	-8.703713417053223	-3.8030803203582764
ENSG00000269896.2	-0.24882547557353973	0.19998624920845032	-0.03852630406618118	0.12512600421905518	-0.37679195404052734	0.6997371315956116	1.0992553234100342	-1.0689475536346436	-4.104007244110107	-3.042603015899658	-3.355469226837158	-4.951267242431641	-5.860742568969727	-6.4336771965026855	-8.446824073791504	-3.513369083404541
ENSG00000272420.1	0.017099987715482712	-0.2523113191127777	-0.7316280007362366	-0.8898817300796509	0.8989548087120056	0.6127465963363647	2.4518659114837646	-0.3352058231830597	-3.5734989643096924	-2.896855115890503	-2.815742015838623	-4.541040897369385	-5.218235015869141	-5.846550941467285	-7.586174011230469	-3.4786577224731445
ENSG00000157916.19	-0.3580833673477173	0.05646243318915367	0.12152677029371262	0.22581639885902405	-1.241904854774475	-0.952821671962738	3.731353282928467	-0.21881571412086487	-4.119467258453369	-3.443251371383667	-3.60905122756958	-4.673126697540283	-5.961647987365723	-6.688085556030273	-8.035064697265625	-3.840423822402954
ENSG00000157911.9	0.6917295455932617	0.04121222719550133	-0.30980390310287476	0.3781408369541168	-0.9862076640129089	-1.1340783834457397	2.963402509689331	-0.5781978368759155	-3.9052388668060303	-3.215823173522949	-3.6539249420166016	-4.605443000793457	-5.659863471984863	-6.562546730041504	-7.717789173126221	-3.864046335220337
ENSG00000149527.17	-0.06965725123882294	0.9173421859741211	-1.810996651649475	0.4813084304332733	-2.2058258056640625	0.1258482038974762	1.468933343887329	-0.5292268991470337	-3.4960389137268066	-2.1918954849243164	-3.4252333641052246	-4.355305194854736	-5.454319953918457	-6.108524799346924	-7.987334251403809	-3.024956703186035
ENSG00000157881.13	-0.6098477840423584	0.01887669786810875	-0.7020568251609802	0.9255532026290894	-0.11369119584560394	-0.648530125617981	2.810959815979004	-0.3857060968875885	-4.021871566772461	-3.203701972961426	-3.43255615234375	-4.695784568786621	-5.485773086547852	-6.351595878601074	-7.784829139709473	-3.5921149253845215
ENSG00000197921.5	2.4739468097686768	1.1570162773132324	-0.3542214035987854	-0.12085354328155518	0.4409099221229553	0.24101683497428894	2.2155656814575195	-1.6853408813476562	-3.93987774848938	-2.58693790435791	-3.358767032623291	-4.707374572753906	-6.098708152770996	-7.171913146972656	-8.490720748901367	-4.001754283905029
ENSG00000272449.1	0.6682642102241516	-0.4580583870410919	0.08910568803548813	0.9117357730865479	-0.13586272299289703	0.6010945439338684	0.8028092980384827	-1.1177748441696167	-3.5738608837127686	-2.3411142826080322	-2.9790782928466797	-3.4771335124969482	-5.02352237701416	-5.250648021697998	-7.725160121917725	-3.44437575340271
ENSG00000157873.17	0.0899912565946579	-0.42842355370521545	0.2615097165107727	0.5644203424453735	-0.9877514243125916	-0.18076768517494202	0.8150233030319214	-0.6227816343307495	-3.784825563430786	-3.1040151119232178	-3.619983673095703	-4.481071949005127	-5.558748245239258	-6.518700122833252	-8.22384262084961	-3.7041876316070557
ENSG00000157870.14	0.468339204788208	-0.10589441657066345	-0.3394271731376648	0.5112686157226562	-0.1039734035730362	-0.42026349902153015	3.727771282196045	-0.4567398130893707	-3.6541528701782227	-2.9108870029449463	-3.0666403770446777	-4.37156343460083	-5.555234909057617	-6.098423957824707	-7.597723960876465	-3.368821382522583
ENSG00000215912.12	0.2002221792936325	0.1977127492427826	-0.14697468280792236	0.06886045634746552	-0.9594095349311829	0.6992957592010498	0.46014657616615295	-0.852664589881897	-3.8258841037750244	-2.8216540813446045	-3.2623510360717773	-4.400460720062256	-5.582831382751465	-6.181406021118164	-8.795829772949219	-3.4265222549438477
ENSG00000177133.10	2.499748706817627	0.24909034371376038	-0.23676639795303345	0.7878459692001343	-1.2305220365524292	0.2362392246723175	3.3690426349639893	-2.0553293228149414	-3.4165799617767334	-2.9616458415985107	-2.669874668121338	-4.153903007507324	-5.027082443237305	-5.360159873962402	-6.352017879486084	-3.233227252960205
ENSG00000142611.16	1.1889196634292603	0.06951609253883362	0.17739588022232056	0.7359366416931152	-1.6195632219314575	0.5308696627616882	1.5112156867980957	-1.0121723413467407	-3.1608335971832275	-2.5729031562805176	-3.098592758178711	-3.9523472785949707	-4.998697280883789	-5.390449523925781	-7.649538516998291	-3.447789430618286
ENSG00000283572.1	-0.4538991153240204	-0.6998323798179626	0.31725525856018066	0.5366216897964478	-1.5347645282745361	0.7254005074501038	0.7200032472610474	-1.3326923847198486	-2.6119778156280518	-2.330357074737549	-3.046207904815674	-3.6709609031677246	-5.196027755737305	-4.1378045082092285	-8.09607982635498	-3.572016954421997
ENSG00000279839.1	0.04955330863595009	-0.02300294116139412	-0.09667319804430008	0.21127426624298096	-0.5499642491340637	0.28373274207115173	0.13389769196510315	-0.3369053900241852	-3.3383281230926514	-2.528679370880127	-2.685260772705078	-3.7823076248168945	-4.964229583740234	-5.243027687072754	-7.254159927368164	-3.2073028087615967
ENSG00000130762.14	0.0032324306666851044	0.1832464337348938	-0.3839036226272583	0.04015690088272095	-0.6993312835693359	-0.060503385961055756	0.098552405834198	-0.30166059732437134	-3.376281499862671	-2.627265214920044	-3.1756339073181152	-4.022796630859375	-4.856195449829102	-5.583281993865967	-7.2395124435424805	-3.4678237438201904
ENSG00000162591.15	0.5860282182693481	0.14606043696403503	-0.2405017912387848	0.2823464274406433	-0.8272991180419922	0.05191416293382645	0.527228057384491	-0.4341149628162384	-3.9014856815338135	-2.989915132522583	-3.420961380004883	-4.490128993988037	-5.594466209411621	-6.371293544769287	-8.491083145141602	-3.7159221172332764
ENSG00000238260.1	-1.2669419050216675	-0.7208345532417297	-0.7734838128089905	0.7731688022613525	-1.1498583555221558	0.1788385808467865	0.8350731730461121	-0.7518576383590698	-3.4360909461975098	-2.3985066413879395	-2.5701749324798584	-4.14159631729126	-5.223130226135254	-5.706453323364258	-7.460021018981934	-3.3486862182617188
ENSG00000158109.14	0.4627166986465454	-0.44775089621543884	-0.162922203540802	-0.15100744366645813	0.3478308320045471	-1.0407942533493042	7.31135892868042	-0.23675766587257385	-2.894460439682007	-2.860915184020996	-2.6587915420532227	-3.840749979019165	-5.347817420959473	-5.133070945739746	-6.97178316116333	-3.134902238845825
ENSG00000116213.15	-0.5257893800735474	0.10783067345619202	-0.7032871246337891	0.39437136054039	-0.5885134339332581	-0.4090261161327362	1.2657780647277832	-0.391098290681839	-4.050532817840576	-3.268498659133911	-3.505617141723633	-4.800440788269043	-5.593436241149902	-6.625961780548096	-8.1065092086792	-3.8504509925842285
ENSG00000227372.11	-0.07901148498058319	0.10401454567909241	-1.2921292781829834	0.060639649629592896	-1.1962016820907593	-0.05979975312948227	2.38983154296875	-0.06553640961647034	-4.060739994049072	-2.8852479457855225	-3.4969873428344727	-4.339078426361084	-5.733124732971191	-6.235115051269531	-7.923668384552002	-3.627260208129883
ENSG00000235169.7	-0.08398771286010742	0.29704830050468445	-0.47838789224624634	0.12227761745452881	-0.6893904805183411	-0.24795415997505188	0.08392168581485748	-0.16940677165985107	-3.2925169467926025	-2.658526659011841	-3.344815731048584	-4.005265235900879	-4.844090461730957	-5.536302089691162	-7.272425174713135	-3.7588791847229004
ENSG00000130764.9	-0.3797910213470459	0.2250317633152008	-0.6778166890144348	0.6782882213592529	-0.3073006272315979	-1.6244643926620483	3.768462896347046	-0.12302890419960022	-3.7616939544677734	-3.1026077270507812	-3.2244462966918945	-4.344245910644531	-5.33005428314209	-6.1843581199646	-7.446197509765625	-3.3035318851470947
ENSG00000116198.12	-0.6413671970367432	0.3469604551792145	-0.4831475019454956	0.10877862572669983	-1.3380986452102661	-0.3880957067012787	3.2250845432281494	-0.3192669451236725	-3.5438637733459473	-2.856631278991699	-3.4146461486816406	-4.145086288452148	-4.989443778991699	-5.846584320068359	-7.310924053192139	-3.3642702102661133
ENSG00000169598.15	-0.6033889651298523	-0.2251783311367035	-0.9380167722702026	0.20113933086395264	-0.6556667685508728	0.7797622084617615	2.1551053524017334	-0.4683099091053009	-4.2085957527160645	-2.8436717987060547	-3.198298931121826	-4.329351425170898	-5.782977104187012	-6.422874450683594	-8.26559829711914	-3.746737241744995
ENSG00000198912.10	-0.2787688374519348	-0.1654735505580902	-0.8483015298843384	-0.20748931169509888	-0.4996538758277893	-0.6891329288482666	1.7950105667114258	-0.38083842396736145	-4.17013692855835	-2.9797489643096924	-3.198884963989258	-4.603806495666504	-5.694042205810547	-6.386578559875488	-8.486672401428223	-3.309389352798462
ENSG00000196581.10	-0.8262823820114136	0.41523900628089905	-0.26301807165145874	-0.04883435368537903	0.9976937174797058	-0.017304979264736176	4.62579870223999	-0.12783804535865784	-3.622001886367798	-2.9036741256713867	-3.0905466079711914	-4.158303260803223	-5.133020401000977	-6.096475124359131	-7.2567524909973145	-3.521080255508423
ENSG00000236948.2	0.1524091511964798	-0.17013147473335266	-0.1977684199810028	-0.3836030662059784	0.23953646421432495	0.20450320839881897	0.280105322599411	-0.10585404932498932	-3.5091896057128906	-2.6388230323791504	-2.8083109855651855	-3.9187700748443604	-4.95833683013916	-5.167268753051758	-7.905091762542725	-3.206033945083618
ENSG00000264101.1	0.6302181482315063	-0.47317585349082947	-0.21524512767791748	0.9495930671691895	0.19771945476531982	2.1409804821014404	1.6233502626419067	-0.07785633206367493	-4.057888031005859	-3.718485116958618	-2.537883758544922	-3.537722587585449	-4.541913032531738	-5.524404525756836	-9.081352233886719	-5.2272562980651855
ENSG00000131697.17	0.10735775530338287	-0.08625444769859314	-0.5854364037513733	0.4270566403865814	-0.3208843469619751	0.7036963105201721	2.508301019668579	-0.33848991990089417	-4.030956268310547	-3.093000650405884	-3.29050350189209	-4.398056507110596	-5.694758415222168	-6.850849151611328	-8.198287963867188	-3.8745243549346924
ENSG00000069424.14	0.7072509527206421	-0.7012156248092651	-0.584003746509552	0.6050724983215332	0.7668605446815491	0.08873144537210464	5.963860034942627	-0.4091304838657379	-3.233612060546875	-3.2075459957122803	-2.704923152923584	-4.324573040008545	-5.478052139282227	-6.194486618041992	-7.936727523803711	-3.6494760513305664
ENSG00000116254.17	0.42941439151763916	0.6094568967819214	-0.6326214671134949	0.17387938499450684	0.5871137380599976	0.8630948662757874	3.173766613006592	-0.3238307535648346	-3.949086904525757	-2.8532657623291016	-3.202853202819824	-4.355640411376953	-5.556949615478516	-6.910101890563965	-7.9484968185424805	-3.9087679386138916
ENSG00000116251.9	0.12348927557468414	-1.3545407056808472	-0.5921922326087952	-0.9334028959274292	-0.7930225133895874	-2.1171131134033203	6.031651973724365	-0.07031670212745667	-3.7936317920684814	-3.2247695922851562	-3.5019803047180176	-4.452136516571045	-5.8595170974731445	-6.77314567565918	-8.7365083694458	-3.4260642528533936
ENSG00000226944.1	0.05349064990878105	0.05581611022353172	-0.324783593416214	0.10204368829727173	-0.14555250108242035	0.16482120752334595	0.32076022028923035	-0.3793070912361145	-3.9728450775146484	-2.39811635017395	-2.555278778076172	-4.036624431610107	-5.800640106201172	-5.880006790161133	-8.273744583129883	-3.3984689712524414
ENSG00000158286.12	-0.0037877149879932404	-0.36820629239082336	-0.8215147852897644	0.7502789497375488	-0.15065766870975494	0.9480682015419006	1.1366479396820068	-0.3912879526615143	-3.9565091133117676	-2.4358811378479004	-2.69352388381958	-3.9224462509155273	-5.695403099060059	-5.857222557067871	-8.471126556396484	-3.483518362045288
ENSG00000116237.15	0.14357890188694	0.38140979409217834	-0.3280852437019348	-0.09935930371284485	0.580694854259491	-1.3030797243118286	5.452795028686523	0.281869500875473	-3.374859094619751	-3.510204792022705	-3.336008071899414	-4.220828533172607	-5.176700592041016	-6.0542707443237305	-7.106719970703125	-3.3943607807159424
ENSG00000158292.6	0.8450008630752563	-0.39463385939598083	-0.4593997597694397	0.38242682814598083	0.39470988512039185	0.07451454550027847	1.6603810787200928	-0.3542446196079254	-3.627077341079712	-2.457231283187866	-3.0122151374816895	-4.142793655395508	-5.249551773071289	-6.21628475189209	-8.086996078491211	-3.1568984985351562
ENSG00000097021.19	-0.9712692499160767	0.6436549425125122	-0.8045645356178284	0.6283488273620605	0.8534026741981506	-0.9506426453590393	4.393979549407959	0.13792762160301208	-3.6327970027923584	-3.2056872844696045	-3.014845371246338	-4.407090187072754	-5.346931457519531	-6.300928115844727	-7.85724401473999	-3.6947548389434814
ENSG00000271746.1	-0.5351952314376831	-0.03474128618836403	-0.06861134618520737	0.4767856299877167	-0.1475873738527298	-0.24944597482681274	0.15115982294082642	-0.44161564111709595	-3.077755928039551	-2.502162218093872	-3.056541919708252	-3.772243022918701	-5.143800735473633	-5.440060615539551	-7.765045642852783	-3.3218326568603516
ENSG00000215788.9	-0.05028187111020088	-1.2422035932540894	-0.1654421091079712	1.1846436262130737	-0.22946797311306	1.1305934190750122	1.5646311044692993	-0.47398725152015686	-4.478025913238525	-2.8949966430664062	-3.1458048820495605	-4.541290283203125	-5.985269546508789	-6.363483428955078	-9.527113914489746	-3.7045581340789795
ENSG00000171680.20	0.773765504360199	-0.7498856782913208	0.1623707413673401	1.0019820928573608	-0.16310565173625946	1.0715115070343018	2.6531131267547607	-0.04199901223182678	-4.621119976043701	-3.3656511306762695	-3.723905086517334	-4.766785621643066	-6.1741132736206055	-7.153788089752197	-9.668901443481445	-4.033205509185791
ENSG00000162408.10	-0.3858703374862671	0.02945723757147789	-0.3890154957771301	-0.12604257464408875	-0.306565523147583	-0.3464301526546478	3.5144906044006348	-0.5759531259536743	-3.8742055892944336	-3.2161312103271484	-3.2042150497436523	-4.689992904663086	-5.510900497436523	-6.543292045593262	-7.865126132965088	-3.514925479888916
ENSG00000204859.12	-0.11939100921154022	0.06539598107337952	-0.6870442628860474	0.2894008755683899	-0.7913684248924255	0.17176344990730286	2.381486415863037	-0.25569358468055725	-4.313518524169922	-3.4519336223602295	-3.6703314781188965	-5.115713119506836	-6.2320051193237305	-7.0324602127075195	-9.046164512634277	-3.9798970222473145
ENSG00000162413.16	-0.9637552499771118	-0.46917757391929626	1.0631239414215088	0.5157256126403809	-2.0429744720458984	-0.5595075488090515	3.3941450119018555	-0.564895749092102	-4.064945697784424	-3.4655632972717285	-3.989823341369629	-4.994209289550781	-6.310704231262207	-6.862865447998047	-8.21426773071289	-4.075451850891113
ENSG00000116273.5	-0.18901817500591278	0.5610591173171997	0.39440256357192993	0.014283418655395508	-0.8283447623252869	-0.7214115858078003	2.426142692565918	0.46986040472984314	-3.6349470615386963	-3.1601765155792236	-3.5498061180114746	-4.4263410568237305	-5.4928998947143555	-6.493014335632324	-7.644350528717041	-3.6906046867370605
ENSG00000041988.15	-0.7151789665222168	-0.5199886560440063	-0.32772624492645264	0.5463814735412598	-0.757318913936615	-0.8952720761299133	2.0090878009796143	-0.5716150999069214	-3.858903169631958	-3.042280912399292	-3.5167112350463867	-4.514751434326172	-5.740059852600098	-6.345692157745361	-8.208727836608887	-3.801259756088257
ENSG00000007923.15	0.06288661062717438	0.14282360672950745	-0.4490869641304016	0.30079981684684753	-0.24111111462116241	-0.5599489808082581	4.196675777435303	-0.20886483788490295	-4.119434356689453	-3.3612260818481445	-3.338022232055664	-4.623509883880615	-5.740472793579102	-6.602144241333008	-8.056638717651367	-3.521196126937866
ENSG00000237436.1	0.18961481750011444	-0.44512006640434265	-0.1952131688594818	-0.2561909258365631	0.2817155122756958	-0.4768373966217041	0.7447068095207214	0.02654382586479187	-3.1479532718658447	-2.4151859283447266	-2.8203635215759277	-3.9554567337036133	-5.095249176025391	-5.862620830535889	-6.822039604187012	-3.5267443656921387
ENSG00000171735.18	-0.8664819002151489	0.32625022530555725	-0.6980785727500916	-0.22693821787834167	0.9902377724647522	-0.8733391165733337	5.5566229820251465	0.1872769296169281	-3.32069993019104	-2.9615752696990967	-2.866133689880371	-3.9870173931121826	-4.969531059265137	-5.808255195617676	-7.167654514312744	-3.282273769378662
ENSG00000207056.1	0.053632210940122604	0.053954269737005234	-0.169979065656662	0.0654703676700592	-0.750627338886261	1.0347378253936768	0.2819930613040924	0.05459553003311157	-3.1187093257904053	-2.4605658054351807	-3.3221726417541504	-3.3324434757232666	-6.035340309143066	-5.437418460845947	-7.869377613067627	-3.8599250316619873
ENSG00000237402.1	-0.4968869686126709	0.7043808698654175	-0.7167465686798096	0.8286319971084595	-1.381858229637146	1.1560332775115967	1.3078429698944092	0.3141789138317108	-3.838944673538208	-1.7949533462524414	-3.1930794715881348	-3.851444721221924	-4.849864959716797	-5.505335807800293	-8.673099517822266	-2.9117136001586914
ENSG00000270171.1	-0.6776156425476074	-0.056399498134851456	-1.031516194343567	-0.3357700705528259	-0.6281370520591736	0.31803178787231445	0.7707719206809998	-0.40567538142204285	-3.897906541824341	-2.8703880310058594	-2.82565975189209	-4.496689796447754	-5.311959266662598	-6.293360710144043	-8.207437515258789	-3.1668646335601807
ENSG00000270035.1	-0.21257086098194122	0.00033321604132652283	-0.8228780627250671	-0.4146529734134674	-0.6977258324623108	0.4158760607242584	1.2428889274597168	-0.35207393765449524	-4.507217884063721	-3.6818580627441406	-3.7328567504882812	-4.973582744598389	-5.853914260864258	-6.85728645324707	-8.793037414550781	-3.61507248878479
ENSG00000269978.1	-0.5988101363182068	-0.7243280410766602	-2.1531500816345215	-0.7675975561141968	-0.8637892007827759	0.06036720424890518	1.9392311573028564	-0.4072624742984772	-5.0652313232421875	-3.444153070449829	-3.9477734565734863	-4.761331558227539	-7.192595481872559	-7.520489692687988	-9.914689064025879	-3.044837236404419
ENSG00000049245.12	-0.12840722501277924	-0.22420582175254822	-0.2575220465660095	-0.992129921913147	-3.0971953868865967	-1.6583709716796875	5.271520137786865	0.022013753652572632	-3.1314094066619873	-3.1170156002044678	-3.5689210891723633	-3.818798542022705	-5.393061637878418	-5.925806522369385	-7.375337600708008	-3.6345560550689697
ENSG00000269925.1	-2.106464147567749	-0.5419818162918091	0.17251938581466675	0.3211970031261444	-0.5867862105369568	-0.4126374423503876	2.1368472576141357	-1.0922318696975708	-2.8875815868377686	-2.2823030948638916	-2.6091184616088867	-3.673105239868164	-4.390433311462402	-5.337883949279785	-5.288835525512695	-2.721491575241089
ENSG00000049246.14	0.06143594905734062	0.1686054766178131	-0.36054450273513794	-0.39474722743034363	-1.5944122076034546	0.2489929497241974	4.0385355949401855	-0.21797314286231995	-3.624376058578491	-2.876206874847412	-3.4223246574401855	-4.232913017272949	-5.888057708740234	-5.672720909118652	-7.8162407875061035	-3.5760223865509033
ENSG00000116288.12	0.15666522085666656	-0.6423047780990601	-0.3071139454841614	-0.3613533079624176	-0.22091515362262726	-2.125258445739746	6.232188701629639	-0.33829012513160706	-3.6432559490203857	-3.5078985691070557	-3.3508477210998535	-4.329418182373047	-5.787895202636719	-6.426827907562256	-8.190347671508789	-3.5461909770965576
ENSG00000116285.12	-0.6972683668136597	-0.49232396483421326	1.1324522495269775	-0.07216182351112366	-0.6509023308753967	-0.6709376573562622	3.213303565979004	0.10757836699485779	-3.3656673431396484	-3.1586997509002686	-3.056936740875244	-3.884272813796997	-5.206299781799316	-5.852236270904541	-6.780371189117432	-3.6133358478546143
ENSG00000162426.14	-0.39706194400787354	1.006891131401062	-0.581631064414978	0.64378821849823	0.6587761640548706	-0.6801796555519104	2.82658314704895	0.25823530554771423	-3.976533889770508	-3.209301471710205	-3.3899641036987305	-4.667208194732666	-5.48415470123291	-6.512955665588379	-7.6352410316467285	-3.9664130210876465
ENSG00000252254.1	0.29561179876327515	0.0945301353931427	-0.3888087272644043	-0.4640398323535919	0.03904442489147186	1.1258066892623901	0.9769877791404724	0.6154018640518188	-4.234735012054443	-2.7018938064575195	-2.7160768508911133	-4.002531051635742	-5.954914093017578	-5.9509429931640625	-8.493002891540527	-3.9759793281555176
ENSG00000142599.17	0.3000485897064209	-1.1815584897994995	-0.28956085443496704	-0.07311537861824036	-1.307397484779358	0.3267423212528229	5.211822986602783	-0.38443461060523987	-3.858534574508667	-3.0156373977661133	-3.2332892417907715	-4.358088493347168	-5.5841779708862305	-5.953481674194336	-7.974280834197998	-3.3095414638519287
ENSG00000232912.5	-0.1604488044977188	-0.6572266817092896	-0.38286668062210083	0.09172265231609344	-0.1671660989522934	0.2411702573299408	0.2246316373348236	0.03161653131246567	-3.4546287059783936	-2.639899730682373	-3.0664377212524414	-4.105705261230469	-5.507169723510742	-5.812465667724609	-8.26933479309082	-3.478940725326538
ENSG00000221083.1	-0.9802911281585693	0.9534950852394104	-0.2678205370903015	0.9953938722610474	-1.3513314723968506	0.9791455864906311	1.482649564743042	-0.5544686317443848	-3.8447272777557373	-1.978395938873291	-3.2767233848571777	-4.433691024780273	-5.503572463989258	-6.296404838562012	-8.817381858825684	-4.139917850494385
ENSG00000224315.2	-0.7328313589096069	0.5798015594482422	-1.5493329763412476	-0.09085112810134888	-2.128329038619995	1.2760953903198242	1.6176016330718994	-0.4515548050403595	-4.086882591247559	-2.5278313159942627	-3.6035537719726562	-4.9689106941223145	-5.920862197875977	-7.038156032562256	-8.954699516296387	-3.859541416168213
ENSG00000222511.2	-1.6675161123275757	-0.07053062319755554	-0.9528883099555969	-1.3074805736541748	-2.3549911975860596	1.686888337135315	2.2949886322021484	-0.4363991320133209	-3.680593729019165	-3.3706915378570557	-3.4822583198547363	-4.636777877807617	-6.2951507568359375	-7.340035438537598	-9.483282089233398	-4.977621555328369
ENSG00000228423.2	0.10419668257236481	-0.039623234421014786	-1.054781198501587	-0.01830044388771057	-2.4226572513580322	1.453715443611145	1.9125235080718994	-0.35181739926338196	-3.261889696121216	-2.10502552986145	-3.705610752105713	-4.044461727142334	-6.032238006591797	-6.223530292510986	-9.388267517089844	-3.1370394229888916
ENSG00000074800.13	0.3967188596725464	0.47070613503456116	1.1412304639816284	0.28278443217277527	-1.3014167547225952	-2.284477949142456	8.781057357788086	-0.522213339805603	-3.8945324420928955	-3.89524507522583	-3.705369472503662	-4.765732288360596	-6.132822036743164	-6.801452159881592	-7.771263599395752	-3.900085687637329
ENSG00000274258.1	0.05411715433001518	0.11443829536437988	-0.2132989466190338	0.27662554383277893	-0.13232974708080292	0.42017707228660583	-0.052959926426410675	-0.1707015037536621	-3.524365186691284	-2.310123920440674	-2.4961366653442383	-4.150473594665527	-5.347892761230469	-5.259292125701904	-8.363297462463379	-3.0697195529937744
ENSG00000236269.1	0.07956431806087494	-0.32585397362709045	-0.49348875880241394	0.41988489031791687	-1.2446784973144531	0.1980525553226471	1.0031746625900269	0.08561238646507263	-2.7684924602508545	-2.4726696014404297	-2.657217502593994	-3.453284502029419	-4.435204982757568	-4.997146129608154	-6.648675441741943	-3.224464178085327
ENSG00000230679.1	0.13093818724155426	-0.17012283205986023	-0.22760111093521118	-0.1393028199672699	0.05076444149017334	-0.14212967455387115	0.4336313009262085	0.11015553772449493	-3.835670232772827	-2.871170997619629	-3.0992207527160645	-4.47101354598999	-5.305434226989746	-6.307523727416992	-8.517654418945312	-3.3379361629486084
ENSG00000142583.17	-0.8040297627449036	-2.0026371479034424	0.49352186918258667	-0.8939111232757568	-0.5239658951759338	-1.5700725317001343	1.2984522581100464	0.47233638167381287	-3.19368577003479	-3.36030912399292	-3.9018826484680176	-4.084715843200684	-5.411622047424316	-6.524011611938477	-8.435656547546387	-4.4326171875
ENSG00000180758.11	-0.10514481365680695	-0.027054939419031143	0.07772310823202133	0.08699598908424377	-0.05242982506752014	0.17100661993026733	0.3025062382221222	-0.11028188467025757	-3.7736339569091797	-2.8149008750915527	-3.214590549468994	-4.305490493774414	-5.360781669616699	-6.001261234283447	-8.009568214416504	-3.7126264572143555
ENSG00000228526.5	-0.06934089958667755	-0.30075255036354065	-0.196971595287323	0.32684728503227234	-0.14385981857776642	0.6110246777534485	1.0276145935058594	0.15396526455879211	-3.5982820987701416	-2.6921892166137695	-2.8797593116760254	-3.983448028564453	-5.21617317199707	-5.895451545715332	-7.729881286621094	-3.413742780685425
ENSG00000234546.3	-0.31816747784614563	-0.43814679980278015	-0.04468599706888199	-0.023047879338264465	-0.022634699940681458	0.20987778902053833	0.36117640137672424	-0.3364597260951996	-3.9034597873687744	-2.709815740585327	-3.0673928260803223	-4.2328104972839355	-5.380772590637207	-6.0864152908325195	-8.091808319091797	-3.643618583679199
ENSG00000281937.1	-0.3305647075176239	0.15837928652763367	-0.5609244108200073	0.32981815934181213	-0.10871179401874542	0.9435020685195923	0.5345319509506226	-0.12330561876296997	-3.251406669616699	-2.4251458644866943	-2.4716782569885254	-3.5819039344787598	-4.812122344970703	-5.038527011871338	-7.630614757537842	-3.326709508895874
ENSG00000049239.12	0.18473710119724274	0.08342424035072327	-0.03485281020402908	0.20637506246566772	-1.8283828496932983	0.36663058400154114	3.0266218185424805	0.5478566884994507	-3.73063063621521	-2.7916994094848633	-3.609201431274414	-4.279656410217285	-5.416914939880371	-6.12750244140625	-7.4927496910095215	-3.4037182331085205
ENSG00000171621.13	-0.5333306789398193	0.1840440332889557	0.5155653357505798	0.6027493476867676	-1.4264841079711914	-1.002517580986023	2.401197671890259	1.2304874658584595	-3.4952964782714844	-3.292158842086792	-3.770540237426758	-4.128791809082031	-5.634958267211914	-6.42810583114624	-7.577546119689941	-3.7727928161621094
ENSG00000171612.6	1.121354579925537	-0.0071772076189517975	1.2465803623199463	-0.9705544710159302	-0.27877479791641235	-0.5529002547264099	3.5648491382598877	-1.151725172996521	-2.91055965423584	-3.2205538749694824	-3.0464859008789062	-4.14286994934082	-4.952507019042969	-5.5779619216918945	-6.717532634735107	-3.5916879177093506
ENSG00000231181.1	0.3083209991455078	0.3055044710636139	0.03705134242773056	0.06761975586414337	-1.353466272354126	1.1040430068969727	1.2493364810943604	-0.4079214632511139	-4.188493728637695	-2.8965272903442383	-3.491827964782715	-4.359626770019531	-5.8517303466796875	-6.739011764526367	-9.070291519165039	-3.5589985847473145
ENSG00000188807.12	0.18018712103366852	0.48241832852363586	-0.46884745359420776	0.6902786493301392	-1.0199506282806396	0.30835410952568054	2.005659580230713	-0.13282278180122375	-3.9196527004241943	-3.0492372512817383	-3.4540810585021973	-4.700587749481201	-5.559720039367676	-6.422433853149414	-8.172490119934082	-3.7885701656341553
ENSG00000171608.15	-0.3395155072212219	-0.42084643244743347	-0.25430411100387573	0.0930710881948471	-0.7355203032493591	-0.39349979162216187	1.1161998510360718	-0.8826041221618652	-4.038036823272705	-3.2042558193206787	-3.532560348510742	-5.005411624908447	-5.7455034255981445	-6.7112531661987305	-8.848407745361328	-3.8103952407836914
ENSG00000171603.16	-0.8946932554244995	1.086692452430725	1.0599416494369507	0.7812204360961914	-0.6463741660118103	-1.615540623664856	7.321717739105225	0.023239225149154663	-3.947561264038086	-3.773712396621704	-3.9315295219421387	-4.712803363800049	-5.941120147705078	-6.5166730880737305	-7.760927200317383	-3.8497378826141357
ENSG00000178585.14	1.7584681510925293	0.18283167481422424	-0.7576481699943542	-0.332326740026474	-0.858616054058075	-0.38269004225730896	4.036466121673584	0.630081057548523	-3.345486879348755	-3.0309560298919678	-3.498307704925537	-4.075247287750244	-5.620981216430664	-6.176798343658447	-7.651022911071777	-3.572911024093628
ENSG00000223989.1	-0.3866186738014221	-0.49119871854782104	0.5277959704399109	0.3896225392818451	0.07258240133523941	0.13879069685935974	0.2365211844444275	-0.7763488292694092	-3.3122236728668213	-2.301522731781006	-2.752009391784668	-4.128825664520264	-4.935675621032715	-5.4274749755859375	-8.306891441345215	-3.7302260398864746
ENSG00000162441.11	0.06542541086673737	-0.29084572196006775	-0.27116960287094116	-0.8673114776611328	-1.6784135103225708	-1.1128970384597778	4.224310874938965	-0.8066054582595825	-3.6430912017822266	-3.033562183380127	-3.375412940979004	-4.371677398681641	-5.415148735046387	-6.1806640625	-7.678709983825684	-3.41190767288208
ENSG00000228150.1	-0.012386608868837357	-0.505828857421875	-0.33646127581596375	-0.5060993432998657	-0.21528135240077972	0.45205220580101013	0.8319290280342102	-0.6822936534881592	-3.1476407051086426	-2.301309823989868	-2.4510488510131836	-4.210371017456055	-3.8949620723724365	-5.7783203125	-6.838604927062988	-3.0152413845062256
ENSG00000173614.13	-0.15584634244441986	-0.1135006844997406	0.11427973955869675	-0.5768651962280273	-0.5393713116645813	-0.31918975710868835	2.0967836380004883	-0.6924854516983032	-3.9512670040130615	-3.268613815307617	-3.222832202911377	-4.517188549041748	-5.534775733947754	-6.275607585906982	-7.742495536804199	-3.7995870113372803
ENSG00000202415.1	-0.6767398118972778	0.1925753653049469	-0.00851476937532425	0.3873339593410492	-0.846278965473175	0.3796360194683075	0.8581187129020691	-0.5713778734207153	-3.5483601093292236	-2.2716362476348877	-2.9047980308532715	-3.9621806144714355	-5.204115867614746	-5.883617877960205	-7.944695472717285	-3.153925657272339
ENSG00000283611.1	-0.40672722458839417	0.048883017152547836	-0.4545206129550934	-0.40912628173828125	-0.3487141728401184	-0.04767850786447525	0.0038467124104499817	0.02936282753944397	-3.4245917797088623	-2.7668306827545166	-2.8222174644470215	-3.644054651260376	-4.881137847900391	-5.261804580688477	-7.8459272384643555	-3.67545747756958
ENSG00000265521.1	-0.3815987706184387	0.08225557208061218	-0.40359732508659363	0.5792323350906372	-1.532056450843811	0.9428132176399231	0.807576060295105	-0.6202081441879272	-3.680353879928589	-2.8677403926849365	-2.793600082397461	-4.186341762542725	-5.422541618347168	-6.013854503631592	-9.860671043395996	-4.3645806312561035
ENSG00000162444.11	0.15505023300647736	0.20889893174171448	-2.46597957611084	-1.1012712717056274	-2.590224504470825	-2.133927583694458	1.932706594467163	1.02729070186615	-2.9593331813812256	-2.7409377098083496	-3.14688777923584	-3.9766197204589844	-5.100025177001953	-6.397245407104492	-8.68270206451416	-4.654140949249268
ENSG00000130939.18	-1.132489562034607	-0.06554588675498962	-0.8181291222572327	0.21385779976844788	-1.0308786630630493	-0.3615756928920746	4.198633670806885	-0.06782689690589905	-3.553272008895874	-2.8602967262268066	-3.1526541709899902	-4.296882629394531	-5.389741897583008	-5.872310638427734	-7.288637161254883	-3.4443793296813965
ENSG00000233623.2	-0.3988124132156372	0.027395572513341904	-0.7659515142440796	0.3505205810070038	-1.0120718479156494	0.6740726828575134	0.7193830609321594	-0.1867736279964447	-3.212435483932495	-1.8454903364181519	-2.3423428535461426	-3.309576988220215	-4.693121910095215	-5.172787189483643	-6.947877407073975	-3.26935076713562
ENSG00000201746.1	0.1996777504682541	0.7444350719451904	-1.2279218435287476	0.4480215013027191	-1.7042027711868286	1.3433564901351929	1.7723160982131958	0.4101044833660126	-4.253381729125977	-2.7018964290618896	-2.963374614715576	-4.70822811126709	-5.639057159423828	-6.297215938568115	-8.284860610961914	-3.476513624191284
ENSG00000054523.17	-0.3889530897140503	0.31011930108070374	-0.36134248971939087	-0.24010732769966125	-1.3192921876907349	-0.8649035096168518	7.077067852020264	-0.1565040647983551	-3.6351640224456787	-3.043306350708008	-3.426267623901367	-4.1744065284729	-5.42929744720459	-5.870241165161133	-7.290653228759766	-3.4527246952056885
ENSG00000264881.1	-0.24492402374744415	-0.3360942304134369	0.24992835521697998	-0.1081542819738388	-1.5884629487991333	1.7126946449279785	1.3186461925506592	0.04832622408866882	-2.2481143474578857	-1.1721795797348022	-1.5736571550369263	-1.5177900791168213	-3.8527731895446777	-3.6442079544067383	-5.91930627822876	-2.0609002113342285
ENSG00000199562.1	-0.7235924005508423	0.6373807191848755	-1.9678313732147217	0.12978044152259827	-2.2578747272491455	2.30576491355896	3.3690621852874756	-0.42184439301490784	-3.70904803276062	-1.5756641626358032	-2.5943760871887207	-4.409863471984863	-5.742539405822754	-6.077079772949219	-8.683107376098633	-2.799525022506714
ENSG00000142657.20	-0.8670576810836792	-0.3708132207393646	1.1317204236984253	0.33810457587242126	-0.8095508813858032	-1.3805146217346191	4.247734546661377	0.44999703764915466	-3.7483503818511963	-3.4838144779205322	-3.48789119720459	-4.530995845794678	-5.55926513671875	-6.608743667602539	-7.635003566741943	-3.755322217941284
ENSG00000175279.21	-0.295264333486557	-0.46957746148109436	-0.2647106349468231	-0.7051124572753906	0.3897392749786377	-0.17380741238594055	0.6885311007499695	-0.36065199971199036	-3.9472928047180176	-3.1160268783569336	-3.189753532409668	-4.379596710205078	-5.371370315551758	-6.296867847442627	-8.166254997253418	-3.5746870040893555
ENSG00000241563.3	-0.3476048707962036	0.191432386636734	-1.466561198234558	0.6045300960540771	2.197556734085083	-1.8488024473190308	2.8288474082946777	0.14555034041404724	-3.710108995437622	-3.67740797996521	-2.557685136795044	-4.802475452423096	-5.0111589431762695	-6.458724021911621	-8.57514762878418	-3.8714470863342285
ENSG00000160049.11	-0.6778799295425415	-0.31739744544029236	0.13687723875045776	-0.13666686415672302	-1.3303650617599487	-1.019269585609436	3.721424102783203	-1.1009443998336792	-3.5851552486419678	-3.2770652770996094	-3.561464786529541	-4.355105400085449	-5.033618927001953	-6.0156707763671875	-7.509372711181641	-3.4877092838287354
ENSG00000142655.12	-0.3243030309677124	-0.09847459197044373	-0.4392893314361572	0.6867935657501221	-0.005292609333992004	-0.7272632122039795	3.1543726921081543	-0.10185447335243225	-3.8637287616729736	-3.2535383701324463	-3.150900363922119	-4.583259105682373	-5.604611396789551	-6.386979579925537	-8.033672332763672	-3.524590253829956
ENSG00000243267.3	-0.1317742019891739	-0.26089951395988464	-0.5941586494445801	0.34193703532218933	-0.4127897024154663	0.9147204756736755	0.7310551404953003	-0.4105042517185211	-2.7375354766845703	-2.095367193222046	-2.1615824699401855	-2.9665679931640625	-4.617544174194336	-4.402029991149902	-6.961826801300049	-3.073249101638794
ENSG00000130940.14	-0.2908044457435608	-0.06841421127319336	0.04806005209684372	0.16633570194244385	-0.09823335707187653	0.12352415174245834	0.24094745516777039	-0.15239104628562927	-3.5577447414398193	-2.6586222648620605	-3.0564260482788086	-4.081773281097412	-5.1146650314331055	-5.67031717300415	-7.427215576171875	-3.404831647872925
ENSG00000120948.15	-1.4911257028579712	-0.0926268994808197	0.10894756764173508	-0.3361051678657532	-0.8320807814598083	-0.8940410017967224	4.091284275054932	-0.4252428114414215	-3.4494876861572266	-2.7164649963378906	-3.0591511726379395	-3.9166109561920166	-5.358009338378906	-5.933279514312744	-7.2177510261535645	-3.5594489574432373
ENSG00000271895.2	-0.47485506534576416	0.0011776946485042572	-1.1030631065368652	-0.6512198448181152	-0.39060044288635254	0.29610374569892883	2.2651259899139404	0.8240829706192017	-3.888430595397949	-2.6712329387664795	-2.501842498779297	-3.5708491802215576	-5.5161285400390625	-5.899508476257324	-7.770627021789551	-2.8783974647521973
ENSG00000116649.9	0.222450390458107	-0.1481536328792572	-0.06401998549699783	0.9802199602127075	-0.002440229058265686	-0.796071469783783	4.644629001617432	-0.5022684335708618	-3.32096791267395	-2.9051475524902344	-2.9211835861206055	-4.001034259796143	-4.887430191040039	-5.608031272888184	-6.402894973754883	-3.0675628185272217
ENSG00000171824.13	-0.22004280984401703	0.18145886063575745	-0.8657802939414978	0.06293687224388123	-1.659152626991272	0.23564866185188293	3.5327725410461426	0.5236371755599976	-4.105825424194336	-3.3075709342956543	-3.677722930908203	-4.619900703430176	-5.902444839477539	-6.640790939331055	-8.507525444030762	-3.8359668254852295
ENSG00000226849.1	-0.5941821336746216	-0.1900443136692047	-0.22753560543060303	0.16953203082084656	-0.41646891832351685	0.552600622177124	0.5536694526672363	-0.5197140574455261	-3.748107671737671	-2.5821261405944824	-3.0160231590270996	-4.2165913581848145	-5.390932083129883	-6.113428115844727	-7.916024208068848	-3.6648600101470947
ENSG00000230337.1	-0.1901014894247055	-0.31603559851646423	-0.27347612380981445	0.2519485652446747	0.3816099762916565	-0.8077213168144226	0.45812559127807617	-0.43166717886924744	-3.6282432079315186	-3.0151314735412598	-2.882164478302002	-4.0727410316467285	-5.1806230545043945	-5.546975612640381	-7.904424667358398	-3.8316574096679688
ENSG00000198793.12	-0.30201613903045654	0.9161657094955444	0.06820493191480637	0.26377007365226746	-0.3797656297683716	-0.5710170865058899	4.765822887420654	-0.012237459421157837	-3.585242986679077	-3.1862218379974365	-3.3481082916259766	-4.389320373535156	-5.359037399291992	-6.093417167663574	-7.144354820251465	-3.50459361076355
ENSG00000120942.13	-0.21095047891139984	0.11874571442604065	-0.25922584533691406	0.022565007209777832	-0.7376351356506348	0.013856925070285797	2.7822799682617188	-0.1442343294620514	-3.8812994956970215	-3.085860013961792	-3.467592239379883	-4.425905704498291	-5.656181335449219	-6.289783954620361	-7.669896125793457	-3.784876585006714
ENSG00000204624.7	-0.16844622790813446	0.6620955467224121	-0.195392906665802	0.6980209350585938	-1.164505124092102	0.6125107407569885	2.8440542221069336	-0.7478116750717163	-3.203216314315796	-2.467177629470825	-2.8993287086486816	-4.206827640533447	-4.778672218322754	-5.6740641593933105	-7.291719436645508	-2.828564405441284
ENSG00000116661.9	0.9149755239486694	-0.39042600989341736	0.3619663119316101	0.7793502807617188	-0.5050480961799622	-1.812148928642273	6.4987287521362305	-0.9170035123825073	-3.5817370414733887	-3.5631771087646484	-3.6654281616210938	-4.456705570220947	-5.535120010375977	-6.248505592346191	-7.5621418952941895	-3.6693074703216553
ENSG00000132879.13	-0.01720963791012764	-0.1845916211605072	-0.4055982232093811	1.1676362752914429	0.3886412978172302	-1.3093661069869995	5.930241584777832	-0.30583325028419495	-3.5292463302612305	-3.4010772705078125	-3.1224637031555176	-4.58256196975708	-5.6317033767700195	-6.143568992614746	-7.7645697593688965	-3.5359244346618652
ENSG00000116663.10	-0.08878956735134125	-0.4004236161708832	0.5114871859550476	0.2958908677101135	0.022493883967399597	-0.858927309513092	2.5435950756073	-0.28180065751075745	-3.8443057537078857	-3.5395641326904297	-3.3861083984375	-4.701294422149658	-5.592741012573242	-6.113157272338867	-7.689871788024902	-3.465590238571167
ENSG00000116670.14	-0.3056172728538513	-0.3769255578517914	-0.044038720428943634	0.5673034191131592	-0.29454225301742554	-1.4997421503067017	2.2322120666503906	0.1703868806362152	-4.2105255126953125	-3.523392677307129	-3.6635351181030273	-4.909407138824463	-5.86398983001709	-7.272521495819092	-8.086112976074219	-3.729546070098877
ENSG00000162490.6	0.27793362736701965	-0.34919342398643494	0.1720219850540161	-0.20427992939949036	0.6683751344680786	-0.029693327844142914	1.2821234464645386	-0.33914878964424133	-4.153693675994873	-3.6634464263916016	-3.4236021041870117	-4.947330474853516	-5.5985918045043945	-7.335625171661377	-8.247913360595703	-3.873677968978882
ENSG00000177674.15	-0.3672999143600464	-0.6838599443435669	0.6939731240272522	-0.3303265869617462	-2.0145912170410156	-0.6735376715660095	1.8379082679748535	0.06578323245048523	-3.828228235244751	-3.708240032196045	-4.172459125518799	-4.605833053588867	-6.376347541809082	-6.704700469970703	-8.243800163269043	-4.128100395202637
ENSG00000177000.10	-0.13661466538906097	-0.11642441153526306	-0.4791637063026428	0.3712817132472992	-0.4855024218559265	0.19620969891548157	3.1960997581481934	-0.23173823952674866	-3.777482748031616	-2.9808623790740967	-3.1628689765930176	-4.416896343231201	-5.3834638595581055	-6.093807220458984	-7.687478542327881	-3.328813314437866
ENSG00000011021.21	-0.664942741394043	0.28451982140541077	-0.23875290155410767	0.441114217042923	-0.9478388428688049	-0.5117376446723938	3.9187521934509277	-0.0898531973361969	-3.586012363433838	-2.9738614559173584	-3.1943883895874023	-4.228169918060303	-5.103693008422852	-5.828948497772217	-7.040953636169434	-3.29105281829834
ENSG00000120937.8	-0.3576095700263977	-0.6420387029647827	-0.19309672713279724	0.0409964919090271	0.9723095297813416	-0.5264080762863159	1.2110682725906372	-0.08735981583595276	-3.435126543045044	-2.4429357051849365	-2.2679147720336914	-3.9671530723571777	-4.905892372131348	-4.775991916656494	-7.767571449279785	-2.7931272983551025
ENSG00000199347.1	0.31162798404693604	-1.0198677778244019	-0.2535657286643982	-1.0705156326293945	-0.27714693546295166	-2.470005989074707	2.8031859397888184	-1.9561704397201538	-2.672710657119751	-1.9112610816955566	-2.051722526550293	-2.861706495285034	-4.052004814147949	-4.304328918457031	-7.5001373291015625	-3.280498743057251
ENSG00000201801.1	-0.07998178899288177	-0.9760735034942627	0.7935104966163635	-0.3431912660598755	-0.4042138457298279	-0.5847363471984863	0.5091652870178223	-0.9883648157119751	-3.8944976329803467	-2.277766466140747	-1.8906095027923584	-4.166430473327637	-4.469083309173584	-5.896369934082031	-7.6655659675598145	-2.8630306720733643
ENSG00000116685.15	-0.499544620513916	0.7493160963058472	0.0021216198801994324	0.3204984962940216	-1.4841228723526	-1.2762843370437622	3.0383691787719727	0.1685238778591156	-3.6502673625946045	-3.3412392139434814	-3.783468246459961	-4.384096145629883	-5.575538635253906	-6.013501167297363	-7.681402206420898	-3.8651349544525146
ENSG00000083444.16	-2.12595534324646	-0.21501263976097107	1.8015410900115967	1.3775360584259033	-1.52920663356781	-0.8064696192741394	3.4434943199157715	-0.5352612733840942	-3.456245183944702	-3.4002668857574463	-3.806985378265381	-4.341002464294434	-5.330745697021484	-6.0521955490112305	-8.021799087524414	-3.9696359634399414
ENSG00000116688.16	0.4143413305282593	-0.023294303566217422	-0.16576582193374634	0.1861400306224823	-0.6900067925453186	-1.348515272140503	6.5816731452941895	-0.10165396332740784	-3.7026991844177246	-3.4838223457336426	-3.485626220703125	-4.5787882804870605	-5.892949104309082	-6.4724626541137695	-7.9375457763671875	-3.7184946537017822
ENSG00000116691.10	-0.39142704010009766	-0.8510810136795044	-0.45877712965011597	0.8944580554962158	-0.8664284944534302	-0.45655015110969543	2.943267822265625	0.09460005164146423	-3.7091171741485596	-3.014669418334961	-3.367849349975586	-4.60458517074585	-5.75161075592041	-5.984795570373535	-8.446983337402344	-3.3825318813323975
ENSG00000120949.14	-1.199166178703308	-0.11724528670310974	0.02898889034986496	0.6526515483856201	0.9814764261245728	0.6050595641136169	2.0814530849456787	1.7323129177093506	-3.2442219257354736	-3.3076114654541016	-3.6621298789978027	-5.46116828918457	-6.2325897216796875	-6.170285701751709	-9.871966361999512	-4.0869598388671875
ENSG00000028137.17	-0.6544238924980164	-0.9095202684402466	2.327540636062622	0.14474979043006897	-1.1618183851242065	-0.9432014226913452	1.816218376159668	1.0171639919281006	-3.8650009632110596	-3.6250720024108887	-3.863980770111084	-4.324513912200928	-5.892436981201172	-6.959893226623535	-8.145784378051758	-4.600137710571289
ENSG00000263676.1	-1.098880648612976	0.547991156578064	-0.1803266406059265	0.2544116675853729	-0.23900343477725983	-0.1868157982826233	0.016024015843868256	0.6080601215362549	-3.777456760406494	-2.789654493331909	-3.5676822662353516	-3.9721150398254395	-6.461606979370117	-5.424798011779785	-8.422138214111328	-4.016643047332764
ENSG00000048707.13	-0.23762987554073334	0.7439543008804321	0.15900498628616333	-0.21261075139045715	-0.9283053278923035	-0.13729652762413025	5.12936544418335	0.11043509840965271	-3.8485429286956787	-3.2674875259399414	-3.41898775100708	-4.517662525177002	-5.772783279418945	-6.36958122253418	-7.60273551940918	-3.6013972759246826
ENSG00000239149.1	0.31988632678985596	-0.3132112920284271	-1.3257286548614502	-1.6178251504898071	-0.6576698422431946	0.5246347784996033	2.633439064025879	-0.11779704689979553	-2.8250772953033447	-2.562314987182617	-2.4108386039733887	-3.2270894050598145	-4.294099807739258	-5.822530746459961	-6.64967155456543	-2.957322835922241
ENSG00000229484.1	-0.7698448896408081	-0.9993658065795898	-0.6745373606681824	0.02625313401222229	-0.040819451212882996	0.21683868765830994	0.6759832501411438	-1.2768136262893677	-3.1086952686309814	-2.5638697147369385	-2.7670068740844727	-3.8825483322143555	-5.127264976501465	-5.623694896697998	-7.672839641571045	-3.8076744079589844
ENSG00000162496.8	-0.3334449529647827	-1.0153740644454956	2.0477819442749023	0.20208269357681274	-1.3665046691894531	-0.43809017539024353	3.4628682136535645	-0.693445086479187	-2.9539544582366943	-3.2670328617095947	-3.391904354095459	-3.9000298976898193	-5.170372009277344	-5.628398895263672	-6.804302215576172	-3.6053686141967773
ENSG00000221340.1	0.4593234956264496	-0.8623335957527161	-0.25301578640937805	-0.15967661142349243	-1.1377125978469849	0.9594168066978455	0.5363491177558899	-0.6337316036224365	-3.947096586227417	-3.5806775093078613	-3.017394542694092	-4.5668416023254395	-6.419548988342285	-6.877295970916748	-10.223601341247559	-3.5380008220672607
ENSG00000276830.1	-0.5253567099571228	0.4459735155105591	-0.10698271542787552	0.36646488308906555	-1.3823615312576294	0.11598502844572067	0.19055086374282837	-0.6729899644851685	-2.798447847366333	-2.393585681915283	-3.4077930450439453	-3.189962387084961	-4.514544486999512	-3.5900208950042725	-6.165864944458008	-3.917163610458374
ENSG00000272482.1	-0.016570795327425003	0.0006727240979671478	0.5101979374885559	0.04347117245197296	0.12317688763141632	-0.15571054816246033	1.1876568794250488	-0.6838897466659546	-2.599670171737671	-2.868450880050659	-3.596574306488037	-3.675987482070923	-4.909448623657227	-5.469246864318848	-7.285323143005371	-3.5920207500457764
ENSG00000157330.9	-0.39056137204170227	-0.13805201649665833	0.09792547672986984	-0.865631103515625	-0.8827486634254456	0.10536790639162064	-0.01846187561750412	-1.8964226245880127	-3.793362855911255	-2.8505916595458984	-3.56398868560791	-4.847262382507324	-6.221619606018066	-6.404502868652344	-9.031611442565918	-4.193756580352783
ENSG00000162493.16	0.006075333803892136	-1.1925164461135864	1.7214752435684204	-0.47065261006355286	-1.6685326099395752	-0.9899111390113831	2.063255548477173	-0.8798813819885254	-3.6970813274383545	-2.914875030517578	-3.757918357849121	-4.578824996948242	-6.169641494750977	-6.773706436157227	-8.031513214111328	-3.918980360031128
ENSG00000116731.22	-0.9967696666717529	-0.0934360921382904	-0.38332003355026245	0.10606178641319275	-0.5208733081817627	0.29113641381263733	4.642500877380371	-0.1622115671634674	-3.5351758003234863	-2.6863372325897217	-3.1450371742248535	-4.202981948852539	-5.47001838684082	-6.068671703338623	-7.5192484855651855	-3.50968337059021
ENSG00000189337.16	-0.8446758985519409	0.28766384720802307	-0.672984778881073	0.455920547246933	-1.447843313217163	-0.22995135188102722	3.356354236602783	-0.1264292299747467	-3.6037850379943848	-2.9435365200042725	-3.325244903564453	-4.35645055770874	-5.427255630493164	-5.8513264656066895	-6.905271053314209	-3.4294660091400146
ENSG00000175147.11	0.05179586634039879	0.17369815707206726	-0.06421732157468796	0.16086357831954956	-0.4906961917877197	0.057632945477962494	0.3180004954338074	-0.7236255407333374	-3.354914426803589	-2.458258628845215	-2.9012327194213867	-4.157252311706543	-5.016898155212402	-5.6497721672058105	-8.206289291381836	-3.4398715496063232
ENSG00000171729.13	0.32329046726226807	0.4574109613895416	0.750933825969696	0.6444494724273682	-0.49118441343307495	-0.6462553143501282	1.285875678062439	-1.3363500833511353	-3.5486788749694824	-3.2404255867004395	-3.479118824005127	-4.6020827293396	-5.450801849365234	-6.121580123901367	-7.4955220222473145	-3.502443552017212
ENSG00000142621.19	-0.48286622762680054	0.019955504685640335	0.09658605605363846	-0.6295962333679199	-0.8105563521385193	0.2268781065940857	0.14258147776126862	-1.4246139526367188	-3.6030285358428955	-2.681295156478882	-3.423794746398926	-4.298893928527832	-5.606346130371094	-5.974547863006592	-8.340285301208496	-3.8396713733673096
ENSG00000142634.12	-0.31180423498153687	-1.0240675210952759	0.9271591901779175	0.5647153854370117	-1.0378402471542358	-0.5531871914863586	2.2706620693206787	0.20807227492332458	-3.941295862197876	-3.113842010498047	-3.9101247787475586	-4.838072299957275	-5.8893327713012695	-6.84636116027832	-8.580561637878418	-3.7431933879852295
ENSG00000132906.17	-0.4328846335411072	-0.11744722723960876	-0.48564594984054565	0.127364844083786	-0.8088622689247131	0.15466538071632385	2.537773847579956	-0.5760115385055542	-3.7531087398529053	-2.8281657695770264	-3.1002674102783203	-4.298407554626465	-5.406785011291504	-5.9548020362854	-7.9950385093688965	-3.4008328914642334
ENSG00000116138.12	-0.9018380641937256	0.31577053666114807	0.09605830162763596	-0.39956972002983093	-0.16873176395893097	-0.6325464844703674	3.419727087020874	-0.06027236580848694	-3.795909881591797	-3.252389669418335	-3.3264660835266113	-4.384108066558838	-5.473929405212402	-6.1251983642578125	-7.617297172546387	-3.6073873043060303
ENSG00000251866.1	-0.31154802441596985	0.10652962327003479	-1.1328760385513306	0.18557992577552795	-0.8239130973815918	1.3039257526397705	1.4820455312728882	0.24161556363105774	-2.9896347522735596	-2.077826499938965	-3.285224437713623	-2.9213056564331055	-5.442717552185059	-6.157622814178467	-7.517529010772705	-4.520423412322998
ENSG00000272510.1	-0.4701150059700012	0.4299297034740448	0.12710228562355042	-0.16422730684280396	0.13545432686805725	-0.23439177870750427	0.04540788382291794	-0.4377466142177582	-2.8568673133850098	-2.4134695529937744	-2.945158004760742	-4.048452854156494	-4.6691179275512695	-5.406123638153076	-7.223738193511963	-3.5414843559265137
ENSG00000116771.5	-0.4581151306629181	-0.07574906945228577	-0.25801318883895874	-0.18675479292869568	0.47261494398117065	-0.5065183639526367	0.6059613823890686	-0.5588498115539551	-3.9857985973358154	-2.9911460876464844	-3.287630081176758	-4.464723110198975	-5.378293037414551	-6.163856029510498	-8.471821784973145	-3.666764259338379
ENSG00000235084.3	-0.6095778346061707	0.04306032881140709	-0.8320454955101013	0.6203945875167847	-0.6437873244285583	-0.895414412021637	0.5625795125961304	-0.3458259403705597	-3.863898515701294	-2.6096010208129883	-2.8946361541748047	-4.215960502624512	-5.288176536560059	-5.83845329284668	-7.413121700286865	-3.711024284362793
ENSG00000197312.11	-0.4782368540763855	0.1677512228488922	-0.3513275384902954	-0.3296441435813904	-0.5768733620643616	0.016642965376377106	2.3399252891540527	0.024979442358016968	-3.8924953937530518	-2.98811936378479	-3.443814277648926	-4.537981986999512	-5.644680023193359	-6.402121543884277	-7.870486736297607	-3.5844407081604004
ENSG00000116786.11	0.9711519479751587	-1.1224864721298218	-0.1153913214802742	0.7632647752761841	-0.8414291739463806	-0.16213855147361755	6.249671936035156	-0.3686164915561676	-3.8469271659851074	-3.2316243648529053	-3.4311161041259766	-4.656745433807373	-5.798799514770508	-6.589027404785156	-8.252241134643555	-3.344224452972412
ENSG00000162461.7	0.04789544269442558	-0.5715083479881287	-0.18151283264160156	0.763943076133728	-0.6128125786781311	0.716998815536499	0.8985622525215149	-0.21499928832054138	-3.526759624481201	-2.5473928451538086	-3.074124336242676	-3.8932173252105713	-5.077485084533691	-5.488981246948242	-7.829295635223389	-3.6011645793914795
ENSG00000162458.12	0.03189747408032417	-0.2336989939212799	0.3164864778518677	0.10681173205375671	-0.3640674352645874	0.004895426332950592	0.2579594552516937	0.39040103554725647	-3.5832502841949463	-2.9199397563934326	-3.3749828338623047	-4.0103254318237305	-5.132040023803711	-5.776728630065918	-7.37110710144043	-3.5259201526641846
ENSG00000233954.6	-0.09360586106777191	-0.8790057897567749	-1.0671955347061157	0.8986165523529053	0.35221976041793823	-1.5510661602020264	2.301584243774414	-0.33898046612739563	-3.9801671504974365	-2.882718801498413	-2.9538140296936035	-4.42999792098999	-5.904267311096191	-6.090870380401611	-7.950655460357666	-3.4814672470092773
ENSG00000179743.4	-0.6701955795288086	-0.117529958486557	-0.38177740573883057	0.1239323765039444	-1.0813697576522827	-0.8166674971580505	1.2662317752838135	-0.7844094038009644	-3.7568581104278564	-2.8230881690979004	-3.422088623046875	-4.438372611999512	-5.809391021728516	-6.204997539520264	-8.64314079284668	-3.9364259243011475
ENSG00000065526.10	-1.3873860836029053	0.20184579491615295	0.3882060647010803	0.5626397132873535	-2.247730255126953	0.09246794134378433	4.393445014953613	-0.5359872579574585	-3.564166307449341	-2.5834429264068604	-3.4398813247680664	-4.237087726593018	-5.165306091308594	-5.810792922973633	-7.44563627243042	-3.3710949420928955
ENSG00000116809.11	-0.12263260781764984	0.1319984495639801	-0.9880662560462952	0.7194715738296509	-1.1394840478897095	-0.7802914977073669	3.0359041690826416	-0.4900123178958893	-3.758413553237915	-2.9667348861694336	-3.533900737762451	-4.595768451690674	-5.4981689453125	-6.360588073730469	-8.000527381896973	-3.5513041019439697
ENSG00000183888.4	1.0408483743667603	-0.8451969623565674	2.6074671745300293	0.4389732778072357	-1.0648752450942993	0.820563018321991	2.3046815395355225	1.2078732252120972	-3.181236982345581	-2.675680160522461	-2.734076499938965	-3.657327175140381	-4.701045513153076	-5.065493583679199	-6.733098983764648	-3.544517755508423
ENSG00000173641.17	0.044296007603406906	0.1480773687362671	-0.058150701224803925	-0.0770956352353096	-0.4552472233772278	-0.010720662772655487	0.11919672042131424	-0.1926472783088684	-3.37577223777771	-2.959472894668579	-3.0266246795654297	-4.322524547576904	-5.014655113220215	-5.825099468231201	-7.359118461608887	-3.4992129802703857
ENSG00000232456.1	0.3900219798088074	-0.22011440992355347	-0.6894086003303528	-0.0972224697470665	-1.2045170068740845	0.15413892269134521	0.30992764234542847	-0.40987327694892883	-3.076345682144165	-2.518789291381836	-2.6124215126037598	-3.788050889968872	-4.940984725952148	-5.04441499710083	-6.993232727050781	-3.160740613937378
ENSG00000185519.8	0.8115146160125732	0.16759160161018372	-0.5986385941505432	0.1001695841550827	-1.9937175512313843	-0.36879709362983704	1.1931061744689941	-0.0657598078250885	-3.3584046363830566	-2.497378349304199	-3.4235634803771973	-3.6656877994537354	-4.887479782104492	-4.864959716796875	-6.656601428985596	-2.837874174118042
ENSG00000142627.12	-0.023952070623636246	-0.4272761642932892	1.850380301475525	0.6591984033584595	-0.770311176776886	0.31293246150016785	0.9284738898277283	0.26456883549690247	-3.198662281036377	-2.2684807777404785	-3.0370283126831055	-3.375441789627075	-4.5934906005859375	-4.690351963043213	-7.187947750091553	-3.3129725456237793
ENSG00000142632.16	0.053586166352033615	-0.10527944564819336	0.1638261377811432	0.08454997837543488	-0.34259873628616333	0.07078950852155685	0.33281901478767395	-0.320468932390213	-3.4645516872406006	-2.7836852073669434	-3.1787800788879395	-4.251070976257324	-5.101136207580566	-5.882686614990234	-7.565709590911865	-3.4352807998657227
ENSG00000237276.8	0.2255633920431137	-0.020717237144708633	-0.2549300491809845	0.17613717913627625	-0.11155234277248383	0.5427408814430237	0.8122463226318359	-0.5208214521408081	-3.4274842739105225	-2.863070249557495	-2.8006787300109863	-4.181563854217529	-5.014804840087891	-5.533010482788086	-7.501772403717041	-3.525095224380493
ENSG00000132881.11	1.2553313970565796	-0.7397304773330688	-0.5108651518821716	0.05725935101509094	0.16696636378765106	-0.13589951395988464	3.4291586875915527	-1.4214743375778198	-3.6345980167388916	-3.0820677280426025	-2.8204469680786133	-4.362944602966309	-5.165340423583984	-6.000606536865234	-7.724630355834961	-3.314815044403076
ENSG00000233929.1	-0.10051576793193817	-0.7488924264907837	0.6571058630943298	1.1053444147109985	-0.23767070472240448	-0.017033778131008148	0.9068204760551453	0.0845663845539093	-2.0659053325653076	-2.183454990386963	-1.9792134761810303	-3.0592026710510254	-3.6990301609039307	-5.519041538238525	-5.263049125671387	-2.915170431137085
ENSG00000037637.10	-0.681171178817749	-0.2710019052028656	0.055777840316295624	0.15211376547813416	-0.2324981838464737	-0.13476011157035828	2.935305118560791	-0.3761855661869049	-4.046530246734619	-3.2683310508728027	-3.339029312133789	-4.663026809692383	-5.7331647872924805	-6.556143283843994	-7.746544361114502	-3.8860745429992676
ENSG00000055070.16	0.5839135646820068	-0.28824958205223083	0.47259634733200073	0.39117881655693054	-1.4179165363311768	-0.7073178887367249	3.949054718017578	-0.29386940598487854	-3.5905702114105225	-3.1240334510803223	-3.2400288581848145	-4.123680591583252	-5.2364959716796875	-5.850364685058594	-7.110510349273682	-3.312091112136841
ENSG00000157191.19	-0.716046154499054	-0.5565961599349976	0.6238609552383423	0.05028921365737915	-1.7512396574020386	-0.9650995135307312	2.1765403747558594	-1.0556820631027222	-3.685387134552002	-3.2856028079986572	-3.545866012573242	-4.699216365814209	-5.700152397155762	-6.743757724761963	-8.2190580368042	-3.9220659732818604
ENSG00000226029.1	-0.7536190748214722	-0.3123050928115845	0.12098539620637894	0.22464510798454285	-0.6266591548919678	0.13888347148895264	0.3018205761909485	-0.8016952276229858	-3.5338079929351807	-2.185576915740967	-2.8877248764038086	-3.9046106338500977	-4.768856048583984	-5.645116806030273	-7.7851457595825195	-3.319363832473755
ENSG00000080947.14	-0.4079170823097229	-0.03882989659905434	-1.0937780141830444	0.6502346992492676	-1.3098711967468262	1.5917028188705444	2.811452627182007	-0.9614853858947754	-3.8053696155548096	-2.342219114303589	-2.9782981872558594	-4.33854341506958	-5.478060722351074	-6.508554935455322	-8.385811805725098	-3.572991371154785
ENSG00000206652.1	-0.8541035652160645	0.17403843998908997	0.5380935072898865	-0.46230435371398926	-0.78044593334198	-0.784687340259552	1.2172582149505615	-1.7277733087539673	-4.041465759277344	-2.186383008956909	-2.983412742614746	-4.899937629699707	-6.091756820678711	-4.599359035491943	-8.241841316223145	-1.8156206607818604
ENSG00000261135.1	-0.12274695932865143	-0.1849781572818756	-0.37226158380508423	-0.22063663601875305	0.06276586651802063	-0.33952388167381287	0.26007911562919617	-0.006279677152633667	-3.3720362186431885	-2.5826971530914307	-3.032233715057373	-4.336896896362305	-5.383424758911133	-5.637580871582031	-8.157064437866211	-3.521566152572632
ENSG00000224174.2	-0.2596800923347473	0.28563392162323	0.2355065941810608	-0.10640379041433334	0.437605619430542	-0.3172300159931183	0.08024794608354568	-0.27305513620376587	-3.9370577335357666	-3.2119600772857666	-3.6590123176574707	-4.874571800231934	-5.595185279846191	-6.968756675720215	-9.3438720703125	-4.3304595947265625
ENSG00000233421.4	-0.6228556632995605	-0.2833804786205292	0.610091507434845	0.6888302564620972	0.13586552441120148	-0.30093032121658325	0.1739232838153839	-0.45423999428749084	-3.574167490005493	-2.756819486618042	-3.1776981353759766	-4.27616024017334	-4.9054107666015625	-6.126377582550049	-8.811979293823242	-3.2119574546813965
ENSG00000219481.10	-0.503629207611084	0.14915886521339417	-0.5550140738487244	-0.2824511229991913	-1.3178246021270752	-0.08372034877538681	2.059051752090454	-0.2108485996723175	-4.480053424835205	-3.199733018875122	-4.202582836151123	-4.834609031677246	-6.311969757080078	-6.972405433654785	-9.329938888549805	-3.8181872367858887
ENSG00000215908.9	-0.4012875556945801	0.3849426805973053	-0.6504166722297668	1.3342175483703613	-1.7568672895431519	0.5893324017524719	3.3971476554870605	0.4395972192287445	-4.072719097137451	-2.2920379638671875	-3.6440443992614746	-4.387822151184082	-5.944653511047363	-6.2386932373046875	-8.600439071655273	-3.139958381652832
ENSG00000186301.8	0.06872697174549103	-0.189975768327713	-0.8154274821281433	-0.3380557894706726	-0.8638573288917542	0.46184536814689636	0.8407406806945801	-0.40459492802619934	-4.530986785888672	-3.090254783630371	-3.440732002258301	-4.6367597579956055	-6.326087951660156	-6.729975700378418	-8.712335586547852	-3.7385308742523193
ENSG00000207513.1	-0.13063944876194	0.5431100130081177	-0.06547844409942627	-0.29057037830352783	-0.037166789174079895	0.28031447529792786	-0.01882828027009964	-0.5629067420959473	-2.576448917388916	-2.2623815536499023	-2.5699260234832764	-3.0869922637939453	-4.363766193389893	-4.387282848358154	-6.080815315246582	-3.389378309249878
ENSG00000236698.1	-0.6749701499938965	-0.618982195854187	-0.22256392240524292	-0.6187191009521484	-0.1241312175989151	-2.3097996711730957	4.103283405303955	0.28280767798423767	-3.8275787830352783	-3.671184778213501	-3.6969223022460938	-3.9681084156036377	-6.24410343170166	-7.046695709228516	-8.9873628616333	-4.166438579559326
ENSG00000058453.16	-0.1461365669965744	0.47640863060951233	-0.7104695439338684	1.0575658082962036	-1.7142812013626099	0.43103066086769104	1.9491181373596191	-0.7675687074661255	-4.516249179840088	-2.9058547019958496	-4.042675971984863	-5.400427341461182	-6.450821876525879	-7.3205413818359375	-9.851436614990234	-4.128415107727051
ENSG00000207389.1	-0.4605928659439087	-0.9112404584884644	-1.8709105253219604	2.8377845287323	-1.315428614616394	-3.6950511932373047	3.7773349285125732	-2.67970609664917	-6.404764175415039	-3.085028648376465	-4.286428928375244	-6.241311550140381	-8.143150329589844	-8.253520965576172	-12.083775520324707	-2.976790189743042
ENSG00000228549.3	-0.46800145506858826	-0.01894751563668251	0.5329350829124451	0.6125291585922241	-0.05522806942462921	-0.32656070590019226	0.024584054946899414	-0.5698385238647461	-3.1139729022979736	-2.571657657623291	-3.236626625061035	-3.9792401790618896	-4.554235458374023	-5.451651573181152	-7.990684986114502	-3.109590530395508
ENSG00000238142.1	-0.24166689813137054	-1.5641785860061646	-0.07450509816408157	0.044192761182785034	-0.14504189789295197	-1.5892218351364136	2.043686866760254	-1.0829442739486694	-5.443537712097168	-4.939881324768066	-5.00723123550415	-6.3660569190979	-7.589590072631836	-8.90340518951416	-11.561995506286621	-5.620201110839844
ENSG00000207005.1	0.6975661516189575	-1.3838213682174683	-3.7651524543762207	3.7604944705963135	-1.7080148458480835	-3.7421438694000244	4.888404369354248	-1.6401599645614624	-3.7040841579437256	-3.507347583770752	-1.6672332286834717	-4.362483024597168	-5.57591438293457	-6.912528038024902	-11.676057815551758	-3.6438753604888916
ENSG00000272426.1	-0.3485437333583832	-0.26462432742118835	-0.2365369200706482	-0.2754663825035095	-0.3542456030845642	-0.039245471358299255	0.1679827868938446	-0.70711350440979	-4.262035369873047	-3.07316517829895	-3.368469715118408	-4.664560794830322	-6.124889373779297	-6.51746940612793	-9.188885688781738	-3.493239164352417
ENSG00000159363.17	0.2542896270751953	-0.11706718802452087	-0.33807986974716187	0.981596827507019	-0.24903501570224762	-0.35242900252342224	5.369259834289551	-0.07242622971534729	-3.94467830657959	-3.3120288848876953	-3.501178741455078	-4.801721096038818	-5.851629257202148	-6.515215873718262	-8.174382209777832	-3.6787242889404297
ENSG00000117118.9	0.29496681690216064	-0.28590092062950134	-0.4547491669654846	-0.4351326525211334	-0.11461986601352692	-1.855379343032837	4.9615044593811035	-0.2486051619052887	-3.504286289215088	-3.177809238433838	-3.314774513244629	-4.070972442626953	-5.491341590881348	-6.105862617492676	-7.873929977416992	-3.4139907360076904
ENSG00000117115.12	0.7664304971694946	0.4677845537662506	-1.4820295572280884	-0.948501467704773	-4.164177894592285	-1.5397523641586304	5.654403209686279	0.6045747995376587	-2.4425253868103027	-2.2934062480926514	-3.0212011337280273	-3.48819899559021	-4.531046390533447	-5.045825958251953	-7.499366760253906	-2.9785139560699463
ENSG00000179051.13	-0.7052872180938721	0.4969159662723541	-0.06326062232255936	0.34722253680229187	-0.7175723314285278	-1.4739590883255005	3.883434534072876	-0.8573459386825562	-3.873425245285034	-3.031090497970581	-3.40399169921875	-4.453247547149658	-4.996489524841309	-6.264246940612793	-7.872954845428467	-3.536771059036255
ENSG00000074964.16	0.73929762840271	0.17280665040016174	0.06247179955244064	0.4975433051586151	-1.110542893409729	0.17859259247779846	3.316406726837158	-0.837081789970398	-3.768303155899048	-2.9397618770599365	-3.1725854873657227	-4.528303146362305	-5.576358795166016	-6.26557731628418	-8.08200454711914	-3.3777687549591064
ENSG00000117154.11	-0.5180025696754456	0.047910477966070175	0.1624234914779663	0.4860735237598419	-0.7067460417747498	-0.7395116686820984	1.5100960731506348	0.0647495687007904	-3.599191427230835	-2.8952476978302	-3.5266613960266113	-4.014864921569824	-5.271465301513672	-6.214598655700684	-7.681135654449463	-3.8071365356445312
ENSG00000280222.1	-0.3334495425224304	-0.13452306389808655	-0.4850814938545227	0.05121973156929016	-0.550773561000824	0.02656146138906479	0.23756417632102966	-0.29678258299827576	-3.3360607624053955	-2.336940050125122	-2.8652310371398926	-3.8467330932617188	-4.930356979370117	-5.412161350250244	-7.16110372543335	-3.222045421600342
ENSG00000159423.16	1.2192610502243042	-0.528467059135437	1.7718416452407837	0.398377388715744	-1.328212857246399	0.14812377095222473	4.482245445251465	-0.5976954698562622	-3.6014811992645264	-3.270223617553711	-3.636678695678711	-4.391358852386475	-5.3296356201171875	-5.9318084716796875	-7.085188865661621	-3.3407399654388428
ENSG00000221662.1	-0.11985856294631958	-0.06107599660754204	0.004758160561323166	-0.1553177684545517	0.08287392556667328	0.18604528903961182	-0.060894303023815155	-0.36115697026252747	-3.505930185317993	-3.3335185050964355	-3.114619255065918	-4.826044082641602	-5.720638275146484	-5.448566913604736	-8.40176010131836	-3.2085189819335938
ENSG00000169991.10	-0.26188236474990845	-0.20198854804039001	1.3116083145141602	0.2859077453613281	-1.0235981941223145	-0.23117992281913757	2.121000289916992	0.21233484148979187	-3.5147812366485596	-2.891033887863159	-3.0514721870422363	-3.7558746337890625	-5.549980163574219	-5.804729461669922	-7.326509952545166	-3.6560606956481934
ENSG00000272084.1	-0.1352691501379013	-0.07397058606147766	-0.15851342678070068	0.24853649735450745	-0.12556903064250946	0.5120086073875427	0.5859469175338745	-0.4023250639438629	-3.650735378265381	-2.6386547088623047	-2.817037582397461	-4.073686122894287	-5.052776336669922	-5.4875688552856445	-7.8547868728637695	-3.3900773525238037
ENSG00000127481.14	-0.595657229423523	0.5454140901565552	-0.06777066737413406	0.34247085452079773	-1.188858151435852	0.14337459206581116	4.8823957443237305	0.08859309554100037	-3.8935601711273193	-3.127607583999634	-3.3882408142089844	-4.551136016845703	-5.697497367858887	-6.33397912979126	-7.646239757537842	-3.551482915878296
ENSG00000230424.1	-0.6671046018600464	-0.6469299793243408	-0.2897639274597168	0.2294984757900238	-1.5068848133087158	-0.36331015825271606	1.2018475532531738	-0.4483819305896759	-3.6743733882904053	-2.759864330291748	-3.336986541748047	-4.472122669219971	-5.668567657470703	-6.722580909729004	-8.734904289245605	-4.177923679351807
ENSG00000127463.13	-0.6259282827377319	0.5154410600662231	0.22623127698898315	0.07281479239463806	-0.30198609828948975	-0.7485695481300354	3.8683204650878906	0.017525047063827515	-3.982015609741211	-3.3533735275268555	-3.4284191131591797	-4.702810287475586	-5.520593643188477	-6.232826232910156	-7.582818031311035	-3.482339382171631
ENSG00000053372.4	0.45373475551605225	0.11291423439979553	-0.49689799547195435	-0.24535849690437317	0.348516583442688	-1.1316535472869873	3.9441237449645996	0.033550113439559937	-4.195409774780273	-3.375823974609375	-3.561155319213867	-4.57008695602417	-5.907229423522949	-6.38694953918457	-8.182446479797363	-3.622570753097534
ENSG00000211454.13	0.17702968418598175	-0.208126038312912	-0.7036705017089844	0.1177079975605011	-0.4872050881385803	0.5328107476234436	0.6545549631118774	-0.04044875502586365	-3.489607334136963	-2.6288301944732666	-3.0212159156799316	-4.217075824737549	-5.20504093170166	-5.8647565841674805	-7.5836100578308105	-3.260918378829956
ENSG00000162482.4	0.8320450782775879	0.6564530730247498	-0.7092068195343018	-0.05999350547790527	-0.7347404956817627	0.2250688374042511	1.769275188446045	-1.4696232080459595	-3.0333306789398193	-2.3081345558166504	-2.8103885650634766	-4.119605541229248	-4.479254722595215	-5.791521072387695	-7.100837707519531	-3.495096206665039
ENSG00000053371.12	0.7243558168411255	0.015552666038274765	0.14743393659591675	-0.10281619429588318	-1.7971856594085693	-0.8564057946205139	4.703357219696045	-1.41512930393219	-3.6205554008483887	-3.1438512802124023	-3.3997678756713867	-4.210846424102783	-5.482714653015137	-5.77674674987793	-7.955329418182373	-3.443671941757202
ENSG00000200403.1	0.008308183401823044	-0.570153534412384	-0.8762791156768799	0.1674138307571411	-0.7404339909553528	1.3379865884780884	1.4867924451828003	-1.0906968116760254	-2.428684711456299	-2.2683396339416504	-2.1921892166137695	-3.345435380935669	-3.896996259689331	-4.426184177398682	-6.2279887199401855	-2.294898271560669
ENSG00000040487.12	-0.18723009526729584	-0.08268055319786072	-0.5753404498100281	0.9005039930343628	-0.9579339623451233	-0.36338183283805847	2.22658634185791	-0.15723195672035217	-3.766146659851074	-2.9008615016937256	-3.2684383392333984	-4.340569496154785	-5.061886787414551	-6.215327739715576	-7.485379695892334	-3.2673962116241455
ENSG00000077549.17	-0.3445192575454712	0.0896855890750885	-0.2266424298286438	0.07246133685112	-0.99555903673172	-1.6404961347579956	5.165653228759766	-0.09149113297462463	-4.056921005249023	-3.540299892425537	-3.656017303466797	-4.776668071746826	-6.185998916625977	-6.968029975891113	-8.448651313781738	-3.983440637588501
ENSG00000235185.1	-0.1467253863811493	0.2747689187526703	-0.9512999653816223	-0.06166224181652069	-0.363633394241333	-0.07375115901231766	0.13425913453102112	-0.6508840322494507	-2.0938587188720703	-2.215101957321167	-2.281691551208496	-3.8560805320739746	-3.561286687850952	-4.8561320304870605	-6.2448601722717285	-2.859642505645752
ENSG00000173436.13	0.49027812480926514	-0.23663243651390076	-0.2273293137550354	-0.8402076959609985	0.2308400720357895	-0.8946236968040466	2.9975547790527344	-0.6647235155105591	-3.2910077571868896	-2.924870491027832	-2.734431743621826	-4.019522666931152	-4.71026086807251	-5.836042404174805	-7.024936199188232	-3.083322763442993
ENSG00000226396.1	-0.6182078123092651	-0.2626459300518036	-0.6402007937431335	-0.4452052712440491	-0.8027397394180298	0.8939005136489868	1.2841095924377441	-0.5315432548522949	-4.063863754272461	-2.1944732666015625	-2.689140796661377	-4.739780902862549	-5.576282501220703	-6.945476531982422	-8.941346168518066	-3.645463466644287
ENSG00000158747.13	1.35518217086792	0.33026018738746643	0.5464721322059631	0.20909079909324646	0.03248618543148041	-0.6480295062065125	3.04927396774292	-0.8832219839096069	-4.1212544441223145	-3.0231330394744873	-2.976132392883301	-4.2616167068481445	-5.230001449584961	-6.092658042907715	-7.843226909637451	-3.2287354469299316
ENSG00000158748.3	0.138332799077034	0.4020790159702301	-0.9855374693870544	0.9301763772964478	0.982776939868927	0.7368921637535095	3.0845398902893066	-0.639372706413269	-2.9483890533447266	-2.350431442260742	-2.384887933731079	-3.749073028564453	-4.900147438049316	-5.381182670593262	-6.779534339904785	-3.4026975631713867
ENSG00000162542.13	0.010157208889722824	-0.0721268355846405	0.16429057717323303	0.045656993985176086	-0.759158730506897	0.0975511446595192	1.0882097482681274	-0.8312327861785889	-3.5981245040893555	-2.9961116313934326	-3.2512917518615723	-4.33606481552124	-5.501446723937988	-6.11670446395874	-7.894604682922363	-3.6872799396514893
ENSG00000169914.5	-0.743238091468811	0.4327222406864166	-0.3096364140510559	-0.43344101309776306	0.5816702842712402	0.059419192373752594	3.769125461578369	-0.15220442414283752	-3.3460381031036377	-2.895948886871338	-2.872694492340088	-4.183257102966309	-5.475277900695801	-6.225534915924072	-6.803010940551758	-3.4978342056274414
ENSG00000127472.10	1.2229551076889038	0.624242901802063	0.4987560510635376	0.1138773262500763	-0.15720055997371674	-0.04356958717107773	1.8734607696533203	-2.165546178817749	-3.5014235973358154	-3.0390374660491943	-2.7317566871643066	-4.675551414489746	-4.898674011230469	-6.698774814605713	-7.530519485473633	-3.4005961418151855
ENSG00000225986.1	0.14178825914859772	-0.4246017634868622	0.23604577779769897	-0.502466082572937	0.005924493074417114	-0.3515961766242981	0.5029522776603699	-1.0763863325119019	-2.822252035140991	-2.609466314315796	-2.8001699447631836	-4.137903690338135	-4.828425407409668	-5.463601589202881	-7.259327411651611	-3.624093532562256
ENSG00000162543.5	-0.48475420475006104	0.11341646313667297	1.4356223344802856	-1.4274311065673828	-1.7052425146102905	-0.04780205339193344	1.2806795835494995	-1.9706398248672485	-3.593256711959839	-2.9715516567230225	-3.479374408721924	-4.8414626121521	-6.045326232910156	-6.662104606628418	-8.991945266723633	-4.286192417144775
ENSG00000158816.15	-0.2220209389925003	-0.22266744077205658	-0.12667548656463623	-0.5302144289016724	-0.9567552208900452	0.3842470347881317	0.024574637413024902	-1.7411099672317505	-3.6643145084381104	-2.648552179336548	-3.1744041442871094	-4.303168296813965	-5.653746604919434	-5.7156829833984375	-8.53030776977539	-3.5044286251068115
ENSG00000236963.6	-0.351881206035614	0.4336108863353729	-1.9863215684890747	-0.7362544536590576	-0.241002157330513	-0.7632290124893188	0.5635511875152588	-1.4100384712219238	-3.755613327026367	-2.5283663272857666	-3.034879207611084	-4.7545061111450195	-5.513201713562012	-5.952645778656006	-8.594722747802734	-3.2649357318878174
ENSG00000226487.1	-0.4851357340812683	0.5784834623336792	-1.3608369827270508	-0.7198638916015625	-0.06131263077259064	-0.36516422033309937	0.4194364845752716	-1.278780221939087	-3.3566596508026123	-2.6419200897216797	-3.30021333694458	-5.211419105529785	-5.207236289978027	-6.358240127563477	-8.82883071899414	-3.7198078632354736
ENSG00000162545.5	0.6565903425216675	0.3226453363895416	-2.300811767578125	-1.029887080192566	-0.4221234917640686	-1.6968008279800415	7.447730541229248	-1.3266834020614624	-3.1433722972869873	-2.8223705291748047	-2.6077823638916016	-3.876152753829956	-5.325569152832031	-5.767673492431641	-7.1334333419799805	-2.94514799118042
ENSG00000090432.6	-0.4737074375152588	0.6579962968826294	0.20879727602005005	0.4474945366382599	-0.5759209990501404	-1.4037084579467773	3.392458438873291	0.3457389771938324	-3.675290822982788	-3.225083112716675	-3.5606937408447266	-4.428721904754639	-5.3917036056518555	-6.503058910369873	-7.33174467086792	-3.893764019012451
ENSG00000183114.7	-0.5396072864532471	0.004346515983343124	1.033847451210022	1.0824350118637085	0.5787522792816162	-0.23214516043663025	2.5007433891296387	-1.2597731351852417	-3.4740793704986572	-2.7513887882232666	-3.002450942993164	-3.912292957305908	-4.974662780761719	-5.670938014984131	-7.167943477630615	-3.4152514934539795
ENSG00000158825.5	0.13765670359134674	-0.4169699251651764	0.887392520904541	0.7754075527191162	-0.7014270424842834	0.06425640732049942	0.42196372151374817	-0.171995609998703	-3.4108479022979736	-2.762361764907837	-3.2713775634765625	-3.5615928173065186	-4.77473258972168	-5.5603742599487305	-7.723760604858398	-3.3275399208068848
ENSG00000158828.6	0.9452172517776489	-0.250175803899765	0.026296071708202362	0.27910420298576355	-0.4217960238456726	-1.6983562707901	7.171874046325684	-0.5147446393966675	-3.5854439735412598	-3.473605155944824	-3.4405717849731445	-4.312965393066406	-5.336391448974609	-6.070748805999756	-7.526556015014648	-3.405029058456421
ENSG00000117242.7	-0.25687944889068604	0.11471405625343323	0.15892717242240906	0.18116280436515808	-0.6130399703979492	-0.05167096108198166	0.9581395983695984	-0.37530097365379333	-4.1683125495910645	-2.7063562870025635	-3.6336922645568848	-5.12074613571167	-6.369145393371582	-7.674458980560303	-9.480072975158691	-4.554997444152832
ENSG00000244038.9	-0.6430729627609253	0.26081910729408264	0.6501820683479309	0.3034727871417999	-0.28782224655151367	-2.116549015045166	4.793949604034424	0.18271932005882263	-4.065035820007324	-3.7861902713775635	-3.7995896339416504	-4.872600078582764	-5.978262901306152	-7.050930976867676	-8.010883331298828	-3.9684360027313232
ENSG00000117245.12	0.11927737295627594	0.019644882529973984	-0.06016851216554642	0.3699961006641388	0.9137860536575317	0.07053665071725845	2.756596803665161	-0.6548925638198853	-4.304060459136963	-3.2621190547943115	-3.2439017295837402	-4.289112091064453	-6.007307052612305	-6.901392936706543	-8.374786376953125	-3.9031317234039307
ENSG00000235432.1	0.711382269859314	0.22884979844093323	-0.5198600888252258	0.4928247630596161	-0.510068953037262	1.882788896560669	0.7683375477790833	-0.8638497591018677	-3.609386444091797	-2.291443347930908	-2.4886841773986816	-3.4940338134765625	-4.576058387756348	-5.159053325653076	-7.862016677856445	-3.3198790550231934
ENSG00000189410.11	0.8973942995071411	-0.058281753212213516	-0.784770667552948	0.1981353461742401	1.6618670225143433	-0.3619717061519623	5.886397361755371	-0.18208876252174377	-3.869440793991089	-3.660963773727417	-3.1163597106933594	-4.85209321975708	-5.891661643981934	-6.970874309539795	-8.155826568603516	-3.8893003463745117
ENSG00000233069.1	-0.38142451643943787	0.03819521889090538	0.06557566672563553	-0.026772230863571167	0.29476600885391235	-0.2732457220554352	0.11616217344999313	-0.21277111768722534	-3.5757830142974854	-2.5095207691192627	-2.7709922790527344	-3.85727858543396	-4.801809310913086	-5.478363037109375	-7.745594501495361	-3.107720375061035
ENSG00000127483.17	-0.8689929246902466	-0.6064671277999878	0.0018016621470451355	-0.2626917064189911	-1.4931174516677856	-0.49515923857688904	5.859011650085449	-0.49980297684669495	-4.025843620300293	-3.2040135860443115	-3.598097324371338	-4.373763561248779	-5.947501182556152	-6.300786018371582	-7.873025894165039	-3.6749417781829834
ENSG00000075151.20	-0.4359647035598755	0.32934728264808655	-0.33640187978744507	-0.12858566641807556	-0.8050441741943359	-0.6408236622810364	5.505676746368408	-0.375418096780777	-3.735966444015503	-3.074918508529663	-3.430187225341797	-4.304192543029785	-5.4185895919799805	-6.321595191955566	-7.722703456878662	-3.5503861904144287
ENSG00000221808.1	-1.0718895196914673	-0.7829996347427368	-1.3637369871139526	-0.7627173662185669	-0.3635444641113281	1.296195387840271	2.4222590923309326	-0.24488380551338196	-3.0815789699554443	-1.3794891834259033	-2.360567092895508	-3.380794048309326	-3.7884113788604736	-4.19282865524292	-5.321375846862793	-2.3491289615631104
ENSG00000233072.1	-0.8056819438934326	0.23862388730049133	-0.5767051577568054	-0.3402808904647827	-1.1989250183105469	1.2168031930923462	1.608719825744629	-0.10104897618293762	-3.5483815670013428	-1.8624906539916992	-2.903461456298828	-3.539076328277588	-4.881521224975586	-5.930673599243164	-7.202051639556885	-3.6158738136291504
ENSG00000236073.2	-1.4764665365219116	-0.15781435370445251	-0.3123452067375183	0.13708966970443726	-1.1276799440383911	1.0263845920562744	2.0936944484710693	-1.142805814743042	-3.3113911151885986	-2.101231813430786	-2.2828369140625	-3.8781018257141113	-5.207120895385742	-5.1601243019104	-6.542221546173096	-3.140892744064331
ENSG00000117298.14	-0.25193703174591064	0.34269586205482483	0.9382804036140442	0.6175155639648438	-2.249610185623169	0.16725125908851624	3.738593816757202	0.8401607275009155	-3.92313814163208	-3.468210220336914	-3.9517226219177246	-4.655032634735107	-5.929642677307129	-6.690384864807129	-8.596131324768066	-3.9869556427001953
ENSG00000227001.3	0.02018500491976738	-0.1383935511112213	-1.134975790977478	-0.6875393390655518	-0.45309174060821533	0.2680526077747345	0.8792799115180969	-0.11106893420219421	-4.5171217918396	-3.03826904296875	-3.140700340270996	-4.580912113189697	-5.466679573059082	-7.06733512878418	-9.500700950622559	-3.330400228500366
ENSG00000187952.9	0.5611655712127686	-0.2570098340511322	-0.07151065021753311	0.9910352230072021	-0.5796107649803162	-0.011678002774715424	1.105657696723938	-0.2412862479686737	-3.7781405448913574	-2.3644909858703613	-3.4312219619750977	-3.848212242126465	-5.122668266296387	-5.7327494621276855	-6.945033550262451	-3.362778902053833
ENSG00000142794.18	0.15947182476520538	0.2678608000278473	0.03771191090345383	-0.1047467291355133	-0.27181190252304077	0.49667325615882874	1.6087427139282227	-0.1724088490009308	-2.930506944656372	-2.3530454635620117	-3.0226545333862305	-3.397988796234131	-4.802227973937988	-5.168121337890625	-6.266841411590576	-3.3022732734680176
ENSG00000162551.13	0.820568859577179	0.5872975587844849	1.8942009210586548	0.844913125038147	-0.7686066031455994	0.155191570520401	2.183821201324463	0.004407018423080444	-4.02365779876709	-3.402125120162964	-4.5297675132751465	-4.212209701538086	-5.437756538391113	-6.537827491760254	-7.614649295806885	-4.475467681884766
ENSG00000076864.19	0.17018689215183258	0.3663555681705475	-0.8839743733406067	0.43567416071891785	0.3841302990913391	0.2989265024662018	8.365097045898438	-0.12471714615821838	-3.585277557373047	-3.3855931758880615	-2.9145383834838867	-4.493309020996094	-5.850740432739258	-6.536057949066162	-8.120500564575195	-3.888134479522705
ENSG00000090686.15	-0.9642480611801147	-0.019652221351861954	-0.5747250914573669	-0.5231505036354065	-0.6234278678894043	-0.02702554315328598	4.351395606994629	0.22490105032920837	-3.554091453552246	-2.918954610824585	-3.221010208129883	-4.223413944244385	-5.364409446716309	-5.979681015014648	-7.236704349517822	-3.5639848709106445
ENSG00000142798.17	0.012788306921720505	-0.1052754819393158	0.23321223258972168	0.6195676326751709	-1.4722996950149536	0.20588091015815735	0.8695892691612244	0.27443727850914	-3.9250898361206055	-3.1416499614715576	-4.253913879394531	-4.802492618560791	-5.765445709228516	-6.814786911010742	-9.159944534301758	-4.189062118530273
ENSG00000218510.6	-0.6101857423782349	-0.7154823541641235	-0.8352416157722473	-0.31190913915634155	-0.7032270431518555	-0.7396222949028015	1.8289239406585693	-0.41119566559791565	-3.8891055583953857	-3.2231035232543945	-3.129446506500244	-4.083281993865967	-5.32529354095459	-6.084083557128906	-8.925810813903809	-3.6008009910583496
ENSG00000070831.15	0.06270016729831696	-0.21325907111167908	-0.4914296269416809	-1.0369880199432373	-1.3125807046890259	-2.3599042892456055	5.925260066986084	0.2699509561061859	-3.7261626720428467	-3.583228826522827	-3.4576120376586914	-4.219647407531738	-5.856499671936035	-6.849560737609863	-8.276936531066895	-3.7908318042755127
ENSG00000230068.2	-0.580167293548584	-0.06057438626885414	-0.21166998147964478	-0.25590112805366516	-1.0574642419815063	1.1757360696792603	1.3965470790863037	-0.3499046862125397	-3.66483736038208	-2.141193389892578	-2.9557132720947266	-4.281680107116699	-5.388007164001465	-5.947576522827148	-7.21278715133667	-3.4963788986206055
ENSG00000271840.1	-1.2272257804870605	0.05623784288764	0.036490730941295624	-0.0651693046092987	-0.39019066095352173	0.7442878484725952	1.1787185668945312	-0.041489750146865845	-3.9163978099823	-2.3869080543518066	-2.8783316612243652	-4.166860103607178	-5.525662422180176	-6.337910175323486	-8.521937370300293	-3.389233350753784
ENSG00000162552.14	-0.005287308245897293	0.2983207702636719	-0.16405466198921204	-0.04255354404449463	-0.06674341857433319	-0.1333620250225067	0.13740170001983643	-0.10146242380142212	-3.375180721282959	-2.5797650814056396	-3.0364575386047363	-4.113180637359619	-5.078901290893555	-5.590667247772217	-7.380636692047119	-3.435006856918335
ENSG00000184677.16	-1.500537395477295	0.35101595520973206	0.07844381779432297	0.25481632351875305	-1.0863476991653442	-0.46385177969932556	3.0883688926696777	-1.3508132696151733	-4.142580032348633	-3.3456690311431885	-3.539872169494629	-4.853329181671143	-5.5445356369018555	-6.596806526184082	-7.919834136962891	-3.8182568550109863
ENSG00000237200.1	-1.5654630661010742	-0.6424702405929565	-0.4387391209602356	0.30878210067749023	-0.7131755352020264	0.6741237044334412	1.1547751426696777	-1.124401569366455	-3.5048394203186035	-2.1856191158294678	-2.376951217651367	-3.2472431659698486	-5.589076995849609	-5.243846416473389	-7.704794883728027	-3.429187774658203
ENSG00000070886.11	0.10739006102085114	-0.21980437636375427	-0.3368184566497803	0.07098248600959778	0.2296728491783142	0.14138442277908325	0.2821754515171051	-0.13673830032348633	-3.527726888656616	-2.4231832027435303	-2.7246313095092773	-3.8063249588012695	-4.847923278808594	-5.386312484741211	-7.1802077293396	-3.196305274963379
ENSG00000173372.16	-3.294931173324585	-2.563962459564209	1.198793649673462	0.05490237474441528	-0.4031221866607666	-5.069939136505127	2.438894748687744	0.5295268297195435	-2.464362382888794	-4.177605628967285	-4.149021625518799	-3.8512561321258545	-4.757489204406738	-6.652525901794434	-8.354366302490234	-4.038551330566406
ENSG00000159189.11	-3.3926494121551514	-3.290273427963257	1.3732906579971313	0.5355538129806519	-0.7096238136291504	-4.332625865936279	2.975588798522949	1.198017954826355	-2.182785749435425	-3.5004167556762695	-3.974928855895996	-3.454024314880371	-4.423360824584961	-5.937147617340088	-7.303032875061035	-3.8898284435272217
ENSG00000173369.15	-3.7869160175323486	-3.6301701068878174	1.3041354417800903	-0.1357116401195526	-0.5424033403396606	-4.487236499786377	3.2816715240478516	1.6228867769241333	-2.1165966987609863	-3.8276476860046387	-4.110539436340332	-3.623457908630371	-4.707249641418457	-6.055262565612793	-7.4523820877075195	-4.071858882904053
ENSG00000133216.16	-0.1250428408384323	1.1756325960159302	-0.6885726451873779	0.07480436563491821	-0.9026493430137634	-0.55111163854599	1.134953498840332	-0.6755285263061523	-3.467463731765747	-2.668015241622925	-3.1549344062805176	-3.9768941402435303	-4.656031131744385	-5.674952983856201	-6.544773101806641	-3.2215280532836914
ENSG00000265422.1	-1.1408512592315674	1.2337075471878052	-1.2689472436904907	0.23204216361045837	-1.0737186670303345	0.30897605419158936	0.03169534355401993	-0.3792310059070587	-2.389475107192993	-2.132385492324829	-2.133692741394043	-3.7650530338287354	-4.142112731933594	-4.876726150512695	-7.633782863616943	-3.1618077754974365
ENSG00000227868.5	-0.32879823446273804	-0.09976986050605774	-0.5838510394096375	0.03349843621253967	-0.47139424085617065	0.1800171434879303	0.2969672679901123	-0.1684916913509369	-4.010601043701172	-2.897294044494629	-3.4125094413757324	-4.418549537658691	-5.717434883117676	-6.286389350891113	-9.103382110595703	-4.056159973144531
ENSG00000004487.15	-0.11968253552913666	-0.2359970510005951	0.2452349066734314	-0.2776636779308319	-0.2532644271850586	-0.7485458254814148	4.524545192718506	0.014947980642318726	-3.8801846504211426	-3.302011013031006	-3.3753676414489746	-4.433294296264648	-5.762530326843262	-6.386196136474609	-7.984074592590332	-3.6741600036621094
ENSG00000263793.1	-0.37739717960357666	-0.1726101040840149	0.19353610277175903	-0.6676946878433228	-0.048515886068344116	0.9176743030548096	0.13522130250930786	-0.06264813244342804	-3.8803863525390625	-2.1842565536499023	-2.284860134124756	-4.511950492858887	-4.876364707946777	-6.005764484405518	-8.446480751037598	-3.321453332901001
ENSG00000169641.13	-0.17256008088588715	0.46698489785194397	0.8288652300834656	-0.020114213228225708	0.5371448993682861	-0.09935422986745834	4.524098873138428	-0.24354878067970276	-3.9852590560913086	-3.566492795944214	-3.6387033462524414	-4.707159519195557	-5.681218147277832	-6.706564903259277	-8.014737129211426	-3.923513412475586
ENSG00000179546.4	-0.2443225234746933	-0.44651731848716736	0.15448147058486938	-0.011488556861877441	1.9494696855545044	-0.3350324332714081	3.2524852752685547	-0.10717383027076721	-3.73665452003479	-2.9074461460113525	-2.799833297729492	-4.0506911277771	-4.775152206420898	-6.13177490234375	-7.302252292633057	-3.5847599506378174
ENSG00000261326.2	-1.3475062847137451	-0.03982362523674965	-0.4449607729911804	-0.5983247756958008	-1.0097094774246216	1.1514097452163696	1.709059715270996	-0.6525523662567139	-3.776923894882202	-1.8850796222686768	-2.828214645385742	-3.6829333305358887	-4.962530136108398	-5.943492889404297	-7.397101879119873	-3.306953191757202
ENSG00000125944.18	-0.7965443134307861	0.07169166207313538	-0.19936424493789673	-0.6008352041244507	-0.9526765942573547	-1.247841477394104	4.627673625946045	0.05719861388206482	-3.716265916824341	-3.2320785522460938	-3.3952808380126953	-4.37372350692749	-5.675236701965332	-6.2405548095703125	-7.784667491912842	-3.5971755981445312
ENSG00000125945.14	-0.7746429443359375	0.2990235388278961	0.17894190549850464	-0.2988363206386566	-0.12071473896503448	-1.3953068256378174	3.920903205871582	-0.49008622765541077	-3.593626022338867	-3.2486836910247803	-3.343142032623291	-4.536208629608154	-5.4365434646606445	-6.140645503997803	-8.028080940246582	-3.6027162075042725
ENSG00000249087.6	-0.6840780973434448	-1.0180639028549194	-0.6509419679641724	0.021832138299942017	-0.6703923344612122	0.12950143218040466	1.9048759937286377	-0.5358231067657471	-4.52800989151001	-3.144883155822754	-3.6692795753479004	-5.168374538421631	-6.449260711669922	-6.722887992858887	-9.337910652160645	-3.861524820327759
ENSG00000204219.9	0.10053129494190216	-0.5252723693847656	0.1435088813304901	-0.4230822026729584	-0.8116921186447144	-0.03756897896528244	0.9939480423927307	-0.6829326152801514	-3.7131831645965576	-2.7783803939819336	-3.0015811920166016	-4.0431976318359375	-5.560480117797852	-5.762900352478027	-8.004168510437012	-3.8085367679595947
ENSG00000088280.18	-0.13111154735088348	-0.8909581899642944	1.2994648218154907	0.31904634833335876	-2.113595724105835	-0.2414698302745819	2.6588735580444336	-0.6661185026168823	-3.8264453411102295	-3.5364742279052734	-3.574953079223633	-4.777735233306885	-6.37623405456543	-6.516279697418213	-8.400147438049316	-4.011289119720459
ENSG00000117318.8	-0.6524698734283447	-0.9622472524642944	1.5000017881393433	-0.17937138676643372	-3.776458740234375	-1.1244953870773315	2.8476459980010986	-2.0269463062286377	-3.839956521987915	-3.2603397369384766	-4.842595100402832	-6.1159515380859375	-6.622237205505371	-7.61570405960083	-9.834482192993164	-5.1016435623168945
ENSG00000142676.12	0.30609047412872314	-1.403924822807312	-0.19335442781448364	-0.3948611915111542	-1.6840840578079224	-2.2788968086242676	7.660999774932861	-0.12988653779029846	-3.464181661605835	-3.2654170989990234	-3.4911246299743652	-4.351753234863281	-5.703545570373535	-6.7979559898376465	-8.478442192077637	-3.451066255569458
ENSG00000011007.12	-0.49879205226898193	0.029285576194524765	0.506538450717926	-0.16189423203468323	-0.7920094728469849	-0.9766526818275452	3.620711088180542	-0.181497722864151	-3.7488114833831787	-3.003323554992676	-3.447604179382324	-4.433481216430664	-5.487658500671387	-6.299172401428223	-7.702307224273682	-3.385071277618408
ENSG00000236810.5	-0.5691827535629272	-0.5130829811096191	-1.2469991445541382	-0.40431758761405945	-0.7384159564971924	0.018524326384067535	1.8451664447784424	-0.7318998575210571	-4.95729923248291	-3.1330840587615967	-3.4319558143615723	-5.056563854217529	-6.455867767333984	-7.677455902099609	-8.855589866638184	-4.237069606781006
ENSG00000057757.9	-0.6705449819564819	-0.2617362439632416	-0.4726027846336365	-0.32027778029441833	-0.20612551271915436	-2.484121799468994	5.6331987380981445	0.5234619379043579	-3.825392961502075	-3.4192044734954834	-3.632561683654785	-4.527965068817139	-5.986886978149414	-6.8585309982299805	-8.336944580078125	-3.867445707321167
ENSG00000011009.10	0.31330299377441406	0.22712627053260803	-0.5225078463554382	0.5011577606201172	0.3795238733291626	-1.1623854637145996	4.151751518249512	-0.7075701951980591	-4.0924601554870605	-3.5717077255249023	-3.2951035499572754	-4.769107818603516	-5.931997299194336	-6.559362411499023	-7.971405982971191	-3.7972192764282227
ENSG00000117308.14	0.038849007338285446	0.20919504761695862	-0.17023813724517822	0.33876121044158936	0.24620147049427032	-0.4872702658176422	2.121189594268799	0.3803083598613739	-4.052414417266846	-3.2950093746185303	-3.4391798973083496	-4.6562724113464355	-5.713705062866211	-6.642731189727783	-8.283098220825195	-3.847222328186035
ENSG00000117305.14	0.35442179441452026	-0.44620904326438904	0.07237421721220016	-0.5066298842430115	-1.0381511449813843	-0.4006047546863556	2.139340877532959	0.1434827744960785	-3.7792415618896484	-3.337961196899414	-3.5488715171813965	-4.578881740570068	-5.982054710388184	-6.414575576782227	-8.188506126403809	-3.680535316467285
ENSG00000179163.11	-0.14496777951717377	0.8853036165237427	0.31250256299972534	-0.637183666229248	-0.012992873787879944	-1.4266196489334106	2.656604051589966	1.0021132230758667	-4.020336627960205	-3.432107925415039	-3.420279026031494	-4.753663063049316	-5.813079833984375	-7.003288269042969	-8.121478080749512	-3.8670969009399414
ENSG00000189266.11	-0.2963172197341919	-0.8524020910263062	1.1523984670639038	-0.7077685594558716	-1.0622069835662842	-1.565820336341858	5.559171199798584	-0.9164484739303589	-3.307548999786377	-3.312286615371704	-3.255751609802246	-4.048726558685303	-5.144129753112793	-5.766621112823486	-7.02138090133667	-3.1538896560668945
ENSG00000188529.14	-0.8902847766876221	-0.2570284307003021	0.21497207880020142	-0.8897576332092285	-0.6406341195106506	-0.4728996455669403	3.4824118614196777	-0.22714224457740784	-3.7025108337402344	-3.2134413719177246	-3.2761197090148926	-4.424684524536133	-5.500448226928711	-6.377842903137207	-7.5354461669921875	-3.670961856842041
ENSG00000185436.11	-0.29766297340393066	-0.45568814873695374	0.7875351309776306	-0.15977317094802856	-0.29863226413726807	0.22565019130706787	0.8263000249862671	0.10558685660362244	-3.7845242023468018	-2.987975597381592	-3.392965316772461	-4.102482795715332	-5.710275650024414	-6.1081438064575195	-8.24531364440918	-4.032990455627441
ENSG00000158055.15	0.11928249895572662	-0.5232505798339844	0.37998461723327637	-0.10038089752197266	-0.40822166204452515	0.14681237936019897	0.21674853563308716	0.2963002026081085	-2.779951572418213	-2.2226474285125732	-2.6571226119995117	-3.0376930236816406	-4.535691261291504	-4.891324043273926	-6.858092784881592	-3.262685537338257
ENSG00000001460.17	-0.8653597235679626	0.21737173199653625	-0.1875104308128357	-0.24551932513713837	-0.23013807833194733	-0.49307942390441895	1.523606300354004	-0.19032350182533264	-3.7719407081604004	-2.8970165252685547	-3.375408172607422	-4.216896057128906	-5.321834564208984	-5.914057731628418	-7.459482192993164	-3.526073694229126
ENSG00000001461.16	-0.9536577463150024	0.49492231011390686	-1.1313656568527222	-0.3787441551685333	-1.5083526372909546	-1.6478092670440674	5.144381999969482	0.34135112166404724	-3.590337038040161	-3.314375877380371	-3.745530605316162	-4.484920978546143	-5.484226226806641	-6.068855285644531	-7.640020370483398	-3.9192347526550293
ENSG00000117602.11	-0.7522035241127014	0.07462206482887268	-1.0041959285736084	-0.7332205772399902	-0.5167604684829712	-0.8104628324508667	1.8564904928207397	0.25017043948173523	-3.839851140975952	-2.9993226528167725	-3.325897216796875	-4.537376403808594	-5.422538757324219	-6.390746116638184	-7.599365711212158	-3.664885997772217
ENSG00000184454.6	-0.2884310483932495	0.2448153793811798	-0.34249475598335266	-0.42740944027900696	-0.4431453347206116	-0.3951168656349182	-0.07790786772966385	-0.2214163839817047	-3.4357192516326904	-2.8979251384735107	-3.2498531341552734	-4.254602432250977	-5.2111358642578125	-5.675439834594727	-7.851757049560547	-3.789057731628418
ENSG00000133226.16	-0.67490553855896	0.19696775078773499	-0.9967687726020813	-0.23400560021400452	-2.0562472343444824	0.49741318821907043	3.9420928955078125	0.18129977583885193	-3.6578762531280518	-2.444378614425659	-3.360241413116455	-4.0310378074646	-5.568389892578125	-6.0654296875	-7.78699254989624	-3.4912912845611572
ENSG00000169504.14	-0.36600983142852783	-0.5882562398910522	0.5406789183616638	-1.5142098665237427	-3.3262851238250732	-2.0127038955688477	6.110517501831055	0.5795208215713501	-3.857363700866699	-3.8724658489227295	-3.9303321838378906	-4.451211929321289	-6.609734535217285	-7.28128719329834	-8.319737434387207	-4.153626441955566
ENSG00000117614.9	0.15160752832889557	-0.20585641264915466	0.31582874059677124	-0.693618893623352	-0.6454068422317505	-1.3030985593795776	3.6846203804016113	-0.37625256180763245	-3.4372918605804443	-3.1354258060455322	-3.2920799255371094	-3.9946250915527344	-5.252453804016113	-6.099493026733398	-7.483417510986328	-3.4942517280578613
ENSG00000117616.17	-1.5082733631134033	-0.042364928871393204	-2.00687837600708	0.12313255667686462	-1.6734580993652344	0.26738861203193665	3.9565415382385254	-0.7712069749832153	-3.8469395637512207	-2.792541027069092	-2.987057685852051	-4.555110454559326	-6.139967918395996	-6.254543304443359	-8.204144477844238	-3.278353691101074
ENSG00000272432.1	-0.21862685680389404	-0.12079906463623047	-0.3645630478858948	0.2972591817378998	0.01818929612636566	-0.10474639385938644	0.29113006591796875	-0.25316429138183594	-4.00739860534668	-3.043510913848877	-3.1278862953186035	-4.335148334503174	-5.683612823486328	-5.819213390350342	-8.099458694458008	-3.6784684658050537
ENSG00000261349.1	-1.9431147575378418	-0.258789986371994	0.4908062219619751	0.39410051703453064	-0.43950027227401733	0.8281511664390564	1.6288151741027832	-0.17814496159553528	-2.267688274383545	-1.973555326461792	-3.052018165588379	-3.1415154933929443	-5.050012588500977	-4.957916736602783	-7.535821437835693	-3.7652058601379395
ENSG00000224183.1	-0.29038798809051514	-0.642263650894165	0.33616605401039124	-0.5113964676856995	0.4267951250076294	-0.18001332879066467	1.610891342163086	-0.09166648983955383	-3.9969136714935303	-4.055212020874023	-3.937018871307373	-4.5338921546936035	-6.474627494812012	-6.87898063659668	-10.092080116271973	-4.6224751472473145
ENSG00000259984.1	-0.6360692381858826	-0.4846402704715729	-0.5953680276870728	0.311705082654953	-0.28991442918777466	0.3391876518726349	0.6663138270378113	-0.4079064130783081	-3.6439521312713623	-3.1322243213653564	-3.6080822944641113	-3.9841885566711426	-5.727362632751465	-6.249577045440674	-7.911194324493408	-4.228947162628174
ENSG00000183726.10	-0.803391695022583	0.46150699257850647	-0.04262704402208328	-0.41521790623664856	-0.33947300910949707	-1.7090377807617188	5.063735485076904	0.36019763350486755	-3.4114930629730225	-3.2418549060821533	-3.26220703125	-4.315155982971191	-5.295682907104492	-6.280336380004883	-7.359280109405518	-3.5097851753234863
ENSG00000188672.17	-0.5378698706626892	0.13009998202323914	-0.037448592483997345	-0.34150949120521545	-0.26439976692199707	-0.15190696716308594	0.8021108508110046	0.04338851571083069	-3.5607426166534424	-2.5554425716400146	-3.4016385078430176	-4.277557849884033	-5.128891944885254	-5.863641262054443	-7.125721454620361	-2.866713047027588
ENSG00000238084.4	-0.5281041264533997	-0.775458812713623	-0.06411341577768326	-0.021193325519561768	0.17581245303153992	-0.22709110379219055	0.39262843132019043	-0.6025339365005493	-3.731151580810547	-2.1484172344207764	-3.055075168609619	-4.367685794830322	-6.061014175415039	-6.004981994628906	-8.487369537353516	-3.479740619659424
ENSG00000204178.9	-1.185914158821106	0.012153532356023788	0.12405114620923996	-0.07381317019462585	-0.61468905210495	-0.6630383133888245	3.8708133697509766	0.289233535528183	-3.7958052158355713	-3.1932601928710938	-3.5089802742004395	-4.567468166351318	-5.441033363342285	-6.476212501525879	-7.80779504776001	-3.690897226333618
ENSG00000157978.11	-1.13581120967865	0.5854660272598267	-1.9154778718948364	0.13515588641166687	-2.9741554260253906	-1.1321585178375244	1.8326903581619263	-0.3129498064517975	-3.42128586769104	-2.2859244346618652	-3.258455276489258	-3.820993423461914	-5.134442329406738	-5.601709842681885	-6.915895462036133	-3.3548662662506104
ENSG00000225643.1	-0.12805069983005524	-0.16846248507499695	-0.5068065524101257	-0.292414128780365	-1.140376329421997	-0.05426790565252304	0.37012240290641785	-0.046029120683670044	-3.704932928085327	-2.310755729675293	-3.1974825859069824	-3.689060926437378	-5.085050582885742	-5.633562088012695	-7.496697902679443	-3.4430301189422607
ENSG00000117643.14	-1.2729109525680542	-0.032404158264398575	0.41826456785202026	-0.5796278715133667	-1.6826180219650269	-0.21121665835380554	1.4955470561981201	-0.8133053779602051	-4.350973606109619	-3.1136181354522705	-3.9371485710144043	-4.6606597900390625	-5.840536117553711	-7.056214809417725	-8.596129417419434	-3.985460042953491
ENSG00000162430.16	0.48383355140686035	-0.06110081449151039	0.9037813544273376	0.5375699996948242	-1.7789371013641357	0.1894778311252594	4.510794162750244	-0.45093002915382385	-4.13095760345459	-3.5634877681732178	-3.7790417671203613	-5.086002826690674	-6.008044242858887	-6.795637130737305	-8.1956148147583	-3.788007974624634
ENSG00000228172.5	0.12066763639450073	-0.10660579800605774	-0.6261007189750671	-0.2624891996383667	-0.19421876966953278	0.13934454321861267	0.34071996808052063	-0.014701545238494873	-3.908104181289673	-2.807664394378662	-3.1086983680725098	-4.50813102722168	-5.55753231048584	-6.312746047973633	-8.366363525390625	-3.6894030570983887
ENSG00000117640.17	0.4521327018737793	-0.4234655797481537	-0.24601417779922485	-0.3091263771057129	-0.119450643658638	-0.4314592778682709	4.432469844818115	-0.6259387731552124	-3.7182185649871826	-3.1253714561462402	-3.098781108856201	-4.17896842956543	-5.41526985168457	-6.1010637283325195	-7.6734395027160645	-3.3226916790008545
ENSG00000182749.5	-0.0580814965069294	0.657962441444397	-0.124687559902668	-0.1331981122493744	-0.5148516297340393	-0.4555828273296356	2.07436203956604	-0.11945071816444397	-4.152405738830566	-3.4307422637939453	-3.6400561332702637	-4.524813652038574	-5.997933387756348	-7.153285503387451	-8.483651161193848	-3.8609790802001953
ENSG00000117632.21	-1.0532804727554321	0.03459801897406578	-2.166811466217041	-1.5270100831985474	-2.793092966079712	-2.132211923599243	4.158815860748291	0.3583761155605316	-2.7448058128356934	-2.7471442222595215	-3.302072525024414	-3.338618278503418	-4.9846343994140625	-5.510222911834717	-7.153223514556885	-3.5996854305267334
ENSG00000158006.13	-0.6213601231575012	0.16621747612953186	0.0064580366015434265	-0.2838408946990967	-1.2305926084518433	-0.3949868381023407	2.2186388969421387	-0.5224477052688599	-3.949948310852051	-3.139247179031372	-3.541703701019287	-4.537409782409668	-5.697762489318848	-6.442031383514404	-8.139372825622559	-3.7827491760253906
ENSG00000158008.9	0.7650812864303589	-0.2453370988368988	-1.1766352653503418	0.00539824366569519	0.29831379652023315	0.7143046259880066	2.9259731769561768	-0.6854394674301147	-3.1691722869873047	-2.683732509613037	-2.775102138519287	-4.035999774932861	-4.977307319641113	-5.906688690185547	-7.020752906799316	-3.3942208290100098
ENSG00000175087.9	-0.6652752161026001	-0.01529679074883461	-0.16201019287109375	-0.8984918594360352	0.1422216147184372	-0.9186543822288513	2.6292576789855957	0.010395139455795288	-3.6938557624816895	-3.0336647033691406	-3.239837169647217	-4.072086811065674	-5.358122825622559	-6.280267715454102	-7.506728172302246	-3.7223236560821533
ENSG00000197245.5	0.11791236698627472	-0.24833810329437256	0.6689222455024719	0.24226409196853638	-0.1968555599451065	-0.23064708709716797	0.38255995512008667	-0.20177173614501953	-4.08762264251709	-3.1766390800476074	-3.5184388160705566	-4.811697006225586	-5.909096717834473	-6.661083221435547	-8.998233795166016	-4.074973106384277
ENSG00000142684.8	0.0017523877322673798	-1.0216442346572876	-0.41621094942092896	0.7180436849594116	-0.27207887172698975	-1.2996982336044312	2.927642822265625	-0.6005774736404419	-3.337890625	-3.122227668762207	-3.030613899230957	-4.023205757141113	-5.256588935852051	-5.943663597106934	-7.296298980712891	-3.028493881225586
ENSG00000142675.17	-1.0800143480300903	-0.4921198785305023	-0.8724938035011292	0.47356894612312317	-0.7172035574913025	0.5208269953727722	0.7901185154914856	-0.5477110147476196	-3.6681206226348877	-1.7703882455825806	-2.4814329147338867	-3.6491827964782715	-4.617952823638916	-5.270459175109863	-8.020186424255371	-3.0905208587646484
ENSG00000236155.6	0.060017284005880356	0.052262600511312485	-0.14825984835624695	-0.3246206045150757	-0.08889874815940857	0.04536460340023041	0.19945475459098816	-0.32278013229370117	-3.4229226112365723	-2.638481855392456	-2.9798622131347656	-4.081873893737793	-4.980409622192383	-5.590256690979004	-7.329101085662842	-3.4831295013427734
ENSG00000130695.13	-0.8385378122329712	0.027231838554143906	-1.2382169961929321	-0.4153600335121155	-1.3275216817855835	-0.5286739468574524	3.1034631729125977	0.511543869972229	-3.8869001865386963	-3.1032156944274902	-3.494353771209717	-4.338000297546387	-5.892114639282227	-6.348071098327637	-8.274885177612305	-3.7932450771331787
ENSG00000142669.14	-0.4045974016189575	-0.2725594937801361	-0.45676666498184204	0.503612756729126	-0.48012495040893555	-2.0989184379577637	4.970345973968506	-0.8761366605758667	-3.4780571460723877	-3.1063382625579834	-3.3438596725463867	-3.909656286239624	-5.192364692687988	-6.137880325317383	-7.515064716339111	-3.474234104156494
ENSG00000158062.20	0.27994561195373535	-0.7135645151138306	-0.5173093676567078	0.06781771779060364	-0.2898486256599426	0.2811180651187897	3.343702793121338	-1.0343173742294312	-3.835071325302124	-2.9068119525909424	-2.8914127349853516	-4.690995693206787	-5.782901763916016	-6.238823413848877	-8.246687889099121	-3.635817766189575
ENSG00000169442.8	0.08581359684467316	-0.581771731376648	-1.489102840423584	-0.05922585725784302	0.8861962556838989	-1.2695046663284302	1.3932631015777588	-1.0420423746109009	-3.877176523208618	-3.092778205871582	-2.967679977416992	-4.549103736877441	-5.175919532775879	-6.421180248260498	-8.76740550994873	-3.350640058517456
ENSG00000117682.16	0.03176058456301689	0.028504755347967148	-0.3651556372642517	0.24161532521247864	-0.20641107857227325	-0.2821337878704071	3.1258363723754883	-0.13071218132972717	-3.6101582050323486	-3.260875940322876	-3.2035436630249023	-4.577575206756592	-5.636492729187012	-6.498966217041016	-7.783593654632568	-3.7856006622314453
ENSG00000223583.1	-0.31377744674682617	-0.1875210702419281	-0.6706342101097107	-0.26077529788017273	-0.2186724692583084	0.09016875922679901	0.23780444264411926	-0.4591023623943329	-3.2943904399871826	-2.3710789680480957	-2.839146137237549	-3.8855490684509277	-4.895209312438965	-5.286886692047119	-7.102231502532959	-3.063558578491211
ENSG00000225891.1	-0.5382605791091919	-0.6524254083633423	-1.0446581840515137	-0.8769924640655518	-1.5627638101577759	0.2650488317012787	1.58647620677948	-0.908077597618103	-4.428976058959961	-3.2402257919311523	-3.5867714881896973	-4.7794036865234375	-6.189349174499512	-6.773009300231934	-9.457825660705566	-4.525736331939697
ENSG00000198830.10	0.015540730208158493	-1.3637298345565796	-0.3139711022377014	-0.7995710372924805	-1.9822138547897339	-1.6227360963821411	5.471169948577881	-0.2754653990268707	-4.221785068511963	-3.529791831970215	-3.9070329666137695	-4.980875015258789	-6.515986442565918	-7.061410427093506	-8.705670356750488	-3.5922389030456543
ENSG00000117676.13	-0.71021568775177	-0.7065994739532471	-1.2691115140914917	-0.15826082229614258	-1.5189167261123657	-1.5855382680892944	1.4629755020141602	0.7343608140945435	-3.501070261001587	-3.0216457843780518	-3.4938907623291016	-4.127743244171143	-5.096736907958984	-6.333523750305176	-7.894642353057861	-4.096818923950195
ENSG00000260063.1	-0.05381162837147713	0.016301121562719345	-0.36392372846603394	-0.13202297687530518	0.024842485785484314	0.014670513570308685	0.1703726053237915	-0.10948723554611206	-3.397655487060547	-2.6918270587921143	-2.955684185028076	-4.0484161376953125	-5.201154708862305	-5.494601249694824	-7.374150276184082	-3.4385104179382324
ENSG00000117713.18	-0.7198864221572876	0.737388014793396	-0.3112567067146301	0.4948693811893463	-1.5008301734924316	0.16228237748146057	3.4845619201660156	-0.2765134871006012	-3.5311758518218994	-2.6691060066223145	-3.3823766708374023	-4.217475414276123	-5.270934104919434	-5.762673377990723	-7.335501194000244	-3.3418161869049072
ENSG00000060642.10	-0.7257970571517944	0.21716824173927307	0.610450804233551	-0.19970965385437012	-0.8491087555885315	-0.7131035327911377	2.475661516189575	-0.6796928644180298	-4.2353196144104	-3.4528450965881348	-3.7974042892456055	-4.761250019073486	-5.790876388549805	-6.841169834136963	-8.175619125366211	-3.976057529449463
ENSG00000204160.11	-0.7741998434066772	-0.2729381024837494	0.6112012267112732	0.7898228168487549	-0.23230521380901337	0.18235090374946594	2.895505428314209	-0.3689974844455719	-3.895160436630249	-3.122178077697754	-3.3457627296447754	-4.689619541168213	-5.3491621017456055	-6.510465145111084	-8.427504539489746	-3.938828468322754
ENSG00000175793.11	-0.17254327237606049	-0.00612172856926918	-0.5467111468315125	0.23730790615081787	0.6963554620742798	-0.7479987144470215	1.0018630027770996	0.36849233508110046	-3.691596508026123	-3.181057929992676	-2.9945926666259766	-4.545536994934082	-5.731740951538086	-6.611403942108154	-8.71363353729248	-3.6359407901763916
ENSG00000142751.14	-0.5774788856506348	-0.28806647658348083	0.07948999851942062	0.3897126615047455	-0.6157389879226685	-0.5477350354194641	3.0362448692321777	-0.04021468758583069	-3.7495453357696533	-3.201824426651001	-3.3057494163513184	-4.408246040344238	-5.357419967651367	-6.141648292541504	-7.624639511108398	-3.445577621459961
ENSG00000198746.12	0.2130885273218155	0.20483675599098206	-0.9519514441490173	-0.08136555552482605	-0.7939662933349609	-0.7533901333808899	2.927520275115967	0.4723881185054779	-3.785698890686035	-3.0783166885375977	-3.463944435119629	-4.735395431518555	-5.8665771484375	-6.32373046875	-8.196927070617676	-3.57358717918396
ENSG00000090273.13	-1.1904469728469849	-0.8241065740585327	0.4662327170372009	0.6521468162536621	-0.8739065527915955	-1.6536591053009033	5.177389621734619	-0.6838697195053101	-3.3885343074798584	-3.1172428131103516	-3.5139498710632324	-4.31878662109375	-5.485815048217773	-6.217905044555664	-7.4984307289123535	-3.576383352279663
ENSG00000253368.3	-0.30272865295410156	-0.3127492368221283	-1.2916266918182373	-0.3024200201034546	1.8606289625167847	-1.269576072692871	4.011854648590088	-0.9433618783950806	-3.3744699954986572	-3.172212600708008	-2.9775867462158203	-4.261716842651367	-5.352893829345703	-6.375463485717773	-8.472894668579102	-3.227912425994873
ENSG00000090020.10	-1.0929999351501465	1.3994978666305542	-0.837386965751648	0.7091469764709473	0.44926947355270386	0.37036827206611633	4.171826362609863	-0.2963973581790924	-3.1158299446105957	-2.8115525245666504	-2.9433789253234863	-3.9537243843078613	-5.204805374145508	-5.56539249420166	-6.907762050628662	-3.466383457183838
ENSG00000214973.3	-0.1998686045408249	0.3248625695705414	-0.14200976490974426	0.7434220314025879	-0.10104422271251678	-0.7247227430343628	0.5830383896827698	-0.18227443099021912	-3.4640634059906006	-2.661597967147827	-3.2955899238586426	-4.035651206970215	-4.608689308166504	-6.520009517669678	-6.99647331237793	-3.4272241592407227
ENSG00000142784.15	0.03699566051363945	-0.3907392919063568	-0.6111788153648376	0.5310195684432983	-0.8240771889686584	0.16578641533851624	4.994838237762451	-0.4461185038089752	-3.4980952739715576	-2.966747283935547	-3.247990608215332	-4.370333671569824	-5.479819297790527	-5.825868129730225	-7.507300853729248	-3.4354465007781982
ENSG00000243659.1	-0.7569829821586609	-1.0815733671188354	-0.3675052523612976	-0.9054495096206665	0.01504470407962799	0.30545225739479065	2.45440673828125	-0.36207762360572815	-4.678340911865234	-3.35148286819458	-3.2943592071533203	-4.812960147857666	-5.590473175048828	-6.669633865356445	-8.979783058166504	-3.155031681060791
ENSG00000186501.14	0.5286608934402466	0.28228631615638733	-0.2470833659172058	0.24953332543373108	-0.7082791328430176	-0.8626301884651184	3.4644827842712402	0.22704920172691345	-3.750438690185547	-3.2859277725219727	-3.2866382598876953	-4.597009658813477	-5.901693344116211	-6.3371734619140625	-7.823740005493164	-3.7970173358917236
ENSG00000206888.1	-1.6282423734664917	0.17225536704063416	-1.040160059928894	0.2706753611564636	-0.09038566052913666	-0.08261805027723312	0.6187427043914795	-0.6778745651245117	-2.7865798473358154	-1.816559910774231	-1.1726804971694946	-3.6121745109558105	-4.131612777709961	-4.834218978881836	-7.958695411682129	-2.1859257221221924
ENSG00000241547.1	-0.5552611351013184	-0.38255831599235535	-1.0110505819320679	0.2630709707736969	-1.0768390893936157	1.0064278841018677	1.4818334579467773	-0.2862500250339508	-3.8691422939300537	-2.0123531818389893	-2.6823596954345703	-3.6653735637664795	-5.222263336181641	-5.881296634674072	-9.150781631469727	-3.5396931171417236
ENSG00000142733.14	-0.02838616445660591	-1.1306594610214233	1.4190995693206787	0.5400359630584717	-1.2580175399780273	0.3533341586589813	1.1159918308258057	0.12758418917655945	-3.971169948577881	-3.2945570945739746	-4.106450080871582	-4.388213634490967	-5.843817710876465	-6.603085994720459	-8.926366806030273	-4.040916919708252
ENSG00000181773.6	0.279182106256485	-0.14362743496894836	0.9449418187141418	0.3699837625026703	-0.05906058847904205	-0.21216514706611633	0.5125381946563721	-0.5956571102142334	-3.172647476196289	-2.4471096992492676	-2.378641366958618	-3.3362233638763428	-4.417606353759766	-4.654169082641602	-5.939657688140869	-3.048701047897339
ENSG00000158195.10	-0.34754908084869385	-0.7133530378341675	0.8212937712669373	0.03560259938240051	-3.060612440109253	-0.41610726714134216	4.350935935974121	0.1235266625881195	-3.602283000946045	-3.301954746246338	-3.857921600341797	-4.188573360443115	-5.817312240600586	-6.160536289215088	-7.755825519561768	-3.718261957168579
ENSG00000237429.1	-0.22879616916179657	-0.6837227940559387	-0.8121741414070129	-0.2505878210067749	-0.22798354923725128	0.0289786234498024	0.5362861752510071	-0.25224146246910095	-3.4293696880340576	-2.752955198287964	-3.2740612030029297	-3.929373025894165	-5.415444374084473	-6.531928062438965	-8.258325576782227	-3.432953119277954
ENSG00000126705.13	0.16534478962421417	0.599685549736023	0.028826646506786346	1.759968638420105	-1.1154011487960815	0.7601564526557922	3.304152488708496	-0.8132234811782837	-3.592541217803955	-2.44174861907959	-3.2352256774902344	-4.028836250305176	-5.1029157638549805	-5.872977256774902	-7.560170650482178	-3.3141393661499023
ENSG00000000938.12	0.12169171869754791	-0.7723241448402405	1.7503060102462769	0.3612540066242218	-0.9746959805488586	0.41203781962394714	1.0403238534927368	0.11065182089805603	-3.983469247817993	-3.2678396701812744	-3.829732894897461	-4.5052080154418945	-5.46553897857666	-6.2786054611206055	-8.621633529663086	-4.003079414367676
ENSG00000235912.1	-0.4811170697212219	-0.2528911530971527	-1.0109237432479858	2.361910581588745	-0.28190261125564575	-1.5017398595809937	2.1860408782958984	-0.3660651743412018	-2.14399790763855	-2.7776403427124023	-3.3413357734680176	-3.9941999912261963	-5.373533248901367	-6.2059736251831055	-6.645579814910889	-4.259196758270264
ENSG00000126709.14	0.057858120650053024	1.1356230974197388	0.7137776017189026	2.2084102630615234	-1.474263072013855	-2.9640305042266846	5.132552623748779	0.18574771285057068	-3.657151937484741	-4.27859354019165	-4.31791877746582	-5.303335666656494	-7.333182334899902	-7.839484691619873	-7.941291809082031	-4.9001336097717285
ENSG00000009780.15	0.15254898369312286	0.24344006180763245	-0.6376556754112244	-0.6578543186187744	-0.5886128544807434	-0.5659658312797546	2.5590567588806152	0.32502731680870056	-3.660154342651367	-3.117844343185425	-3.272097587585449	-4.377004146575928	-5.518985748291016	-6.030210971832275	-7.4091057777404785	-3.5199666023254395
ENSG00000231344.1	0.11283011734485626	0.2073228657245636	-0.5249266028404236	-0.3158058226108551	-0.31559044122695923	0.6090019941329956	0.5757289528846741	0.07661435008049011	-3.8945329189300537	-2.4711031913757324	-3.0275425910949707	-3.64815092086792	-5.854532241821289	-5.859918594360352	-8.368541717529297	-4.047801971435547
ENSG00000230833.1	0.3008077144622803	0.3539523184299469	-0.5835455060005188	-0.0764019638299942	-0.15185381472110748	0.6353318095207214	0.5461910963058472	0.010068118572235107	-3.7879858016967773	-2.8829762935638428	-2.997767925262451	-4.050465106964111	-5.359410285949707	-5.705391883850098	-7.445965766906738	-3.5036849975585938
ENSG00000117758.13	-0.16919384896755219	-0.3480618894100189	0.2914127707481384	-1.0013432502746582	-0.9790295958518982	-1.3281056880950928	5.579723834991455	0.3890596330165863	-3.5568482875823975	-3.3111777305603027	-3.3751487731933594	-4.156663417816162	-5.5125274658203125	-6.245632171630859	-7.674752712249756	-3.4579880237579346
ENSG00000269971.1	-0.3224884867668152	-1.7006222009658813	-0.2602441906929016	-0.18438971042633057	-0.9478388428688049	1.8232442140579224	2.607348918914795	-0.3528365194797516	-3.994323492050171	-2.9195852279663086	-3.841063976287842	-4.440284729003906	-7.311221122741699	-6.838371753692627	-8.798304557800293	-3.701713800430298
ENSG00000270031.1	-1.223882794380188	-0.5193917751312256	0.19815531373023987	-0.6138991117477417	-0.47449302673339844	1.1359401941299438	1.2443197965621948	-0.24661752581596375	-3.767653226852417	-3.1331775188446045	-2.91326904296875	-4.066750526428223	-5.799528121948242	-5.899324893951416	-7.742541313171387	-4.1332268714904785
ENSG00000117751.17	-0.4659203290939331	-0.09582743048667908	-0.05314631015062332	-0.533461332321167	-0.7302916049957275	-1.935937762260437	4.323540687561035	-0.17887011170387268	-3.5672991275787354	-3.3459911346435547	-3.502957344055176	-4.402782440185547	-5.365203857421875	-6.371081829071045	-7.616503715515137	-3.5902702808380127
ENSG00000252947.1	-0.29913461208343506	-0.5464593172073364	-2.492615222930908	1.2035903930664062	-0.4034147262573242	-1.6797209978103638	2.3572511672973633	-0.26677563786506653	-3.0579440593719482	-2.712130308151245	-2.6803441047668457	-4.343636989593506	-5.492461204528809	-5.861433982849121	-8.568290710449219	-2.98294997215271
ENSG00000130775.15	-1.0674004554748535	-0.5817999839782715	-0.12913286685943604	-0.683279275894165	-2.0936219692230225	-0.7679281234741211	1.0678367614746094	0.918554425239563	-3.0703554153442383	-2.9314541816711426	-3.045701026916504	-3.363983154296875	-5.138582229614258	-5.423996448516846	-7.034144401550293	-4.112033367156982
ENSG00000117748.9	-0.5368614196777344	-0.27010664343833923	0.1266041398048401	-0.5923738479614258	-0.2273954302072525	-2.1122255325317383	4.339413166046143	-0.25384727120399475	-4.215158462524414	-3.8653604984283447	-3.6691198348999023	-5.145740032196045	-5.9605865478515625	-7.276641845703125	-8.606776237487793	-4.262299060821533
ENSG00000130768.14	-0.4565109610557556	-0.20439493656158447	-0.007626578211784363	-0.11344549804925919	0.40565526485443115	0.11657200008630753	0.30496370792388916	-0.2053849846124649	-3.8486342430114746	-2.855653762817383	-3.175570487976074	-4.155738353729248	-5.202700614929199	-5.885566234588623	-7.869960784912109	-3.814440965652466
ENSG00000158156.7	-0.377000093460083	0.1558873951435089	-0.13359898328781128	0.3114604949951172	-0.699404776096344	-0.3602154552936554	1.8034944534301758	-0.05026426911354065	-4.167872428894043	-3.3914194107055664	-3.269883155822754	-4.680166244506836	-5.849531173706055	-6.645662784576416	-8.091288566589355	-3.822777271270752
ENSG00000158161.15	-1.2040579319000244	-0.2525993287563324	0.3383944630622864	-0.12550100684165955	-0.8780251145362854	0.0676441565155983	3.0791420936584473	-0.7221163511276245	-3.948132038116455	-3.2909045219421387	-3.5719642639160156	-4.75431489944458	-5.7310686111450195	-6.383967399597168	-7.9657158851623535	-3.7320468425750732
ENSG00000238231.2	-0.9291967749595642	0.2019340693950653	-0.6779987215995789	0.22911083698272705	-0.38040614128112793	0.5261538028717041	0.6974106431007385	-0.5154820680618286	-3.7556467056274414	-2.0623621940612793	-2.122013568878174	-3.8315773010253906	-5.107572555541992	-5.740015029907227	-7.528476715087891	-3.2839255332946777
ENSG00000240750.3	-0.637731671333313	-0.12608447670936584	-0.9355672001838684	0.2744967043399811	-0.6212128400802612	0.7224370241165161	1.0550674200057983	-0.5408302545547485	-3.1123223304748535	-2.181016683578491	-3.1561102867126465	-3.9641425609588623	-5.55190372467041	-5.873288154602051	-8.109235763549805	-3.369713306427002
ENSG00000228589.3	-0.5247894525527954	-0.5567318201065063	0.15109074115753174	0.5820389986038208	-0.7303214073181152	-1.27571702003479	2.8924062252044678	-0.9877594709396362	-3.0393524169921875	-1.641871690750122	-1.3257853984832764	-3.5579395294189453	-3.737183094024658	-3.187136173248291	-5.03753662109375	-0.36385804414749146
ENSG00000214812.3	-0.16844239830970764	-0.15981650352478027	-0.7624567747116089	-0.3988514244556427	-0.04317335784435272	-0.09935066848993301	0.09291025251150131	-0.7992969751358032	-3.3254756927490234	-2.702104091644287	-2.7438807487487793	-4.049498558044434	-4.871585845947266	-5.50855016708374	-7.6254496574401855	-3.5167267322540283
ENSG00000169403.11	-1.2109638452529907	-0.5734174251556396	-0.24862846732139587	-0.4330836832523346	-0.5833549499511719	-1.7620508670806885	0.63906329870224	-0.8641754388809204	-3.2243094444274902	-3.1554837226867676	-3.5522713661193848	-4.590328693389893	-5.375011444091797	-6.530679225921631	-8.39731502532959	-4.318220138549805
ENSG00000126698.10	0.3595508337020874	-0.3506554067134857	0.014382295310497284	-0.8143711090087891	-0.5687140822410583	-1.6686679124832153	5.293574810028076	-0.14518490433692932	-3.538557291030884	-3.1830508708953857	-3.3115286827087402	-4.143826007843018	-5.541446685791016	-6.281022071838379	-7.654507637023926	-3.4242348670959473
ENSG00000130770.17	-0.14390741288661957	-1.573229193687439	-1.4619560241699219	0.5067179203033447	0.28430789709091187	-2.1193933486938477	5.193050384521484	-0.737014651298523	-3.6856133937835693	-3.4365949630737305	-3.576446533203125	-4.626373767852783	-5.701113700866699	-6.671030521392822	-8.735313415527344	-3.531589984893799
ENSG00000270605.1	-0.0822785496711731	-0.4289478063583374	-0.8203772902488708	-0.2795320749282837	-0.36227893829345703	0.30398643016815186	0.21428540349006653	-0.5644856691360474	-4.1015520095825195	-3.035247564315796	-3.3152074813842773	-4.5996599197387695	-5.398943901062012	-6.413991451263428	-8.494961738586426	-3.758338212966919
ENSG00000130766.4	-1.2369974851608276	-0.6496893167495728	1.9359239339828491	1.4436942338943481	-0.15662775933742523	-0.8185839653015137	1.8664047718048096	-0.4849400818347931	-4.438392162322998	-3.454559564590454	-3.8341140747070312	-5.0205206871032715	-5.70050048828125	-7.486730098724365	-8.881803512573242	-3.8437938690185547
ENSG00000130772.13	-0.7494308948516846	-0.25994953513145447	-0.3660600781440735	0.1771221160888672	-0.385922372341156	-1.3181639909744263	2.1440205574035645	-0.5027250051498413	-3.668898820877075	-3.5741727352142334	-3.2434921264648438	-4.662797451019287	-5.5202836990356445	-6.413095951080322	-8.1046781539917	-3.8839426040649414
ENSG00000204138.12	-0.48007911443710327	-0.3524228036403656	-0.545430064201355	-0.09382760524749756	-1.8923207521438599	0.4112098515033722	2.3994178771972656	-0.5817941427230835	-3.7536065578460693	-2.6738462448120117	-3.2291078567504883	-4.118852138519287	-5.526242256164551	-6.10744047164917	-8.262633323669434	-3.5321993827819824
ENSG00000229820.2	-0.09754385054111481	-0.05608085170388222	-0.7068455219268799	-0.24004897475242615	-0.872628927230835	1.05215585231781	0.926485002040863	-0.6922578811645508	-3.9610648155212402	-2.4042422771453857	-2.70501708984375	-3.9280154705047607	-4.770477294921875	-5.9931793212890625	-7.362090110778809	-3.6699583530426025
ENSG00000221216.1	-0.5059360265731812	-0.11327549815177917	0.08661331981420517	-0.3755844533443451	-0.8894196152687073	1.3158713579177856	1.0890861749649048	-0.6192494630813599	-3.827633857727051	-2.790822744369507	-2.8989553451538086	-5.038888454437256	-5.162330627441406	-6.123800277709961	-8.110127449035645	-4.641115665435791
ENSG00000180198.15	-1.6241878271102905	-0.7477337121963501	0.5771262645721436	0.5277227163314819	-0.10443131625652313	-0.6282610297203064	1.427585482597351	-1.0179851055145264	-3.944934368133545	-2.9879117012023926	-3.2364773750305176	-4.522298336029053	-5.028694152832031	-5.8291168212890625	-7.453489780426025	-3.1265153884887695
ENSG00000242125.3	-0.8382260799407959	-1.6420916318893433	0.4588112235069275	0.1464044153690338	-0.49640005826950073	0.14537957310676575	2.09804105758667	0.19960996508598328	-3.57429838180542	-2.612779140472412	-3.0872578620910645	-4.027587890625	-5.539081573486328	-5.688572883605957	-7.467813491821289	-3.1303653717041016
ENSG00000200087.1	1.4070149660110474	-1.8515070676803589	-3.8102025985717773	3.810429811477661	-3.1979293823242188	-2.7055253982543945	10.497269630432129	-1.7620395421981812	-3.4450151920318604	-4.58378791809082	-4.255092144012451	-7.03816032409668	-7.973766326904297	-8.73561954498291	-11.482823371887207	-5.548542022705078
ENSG00000180098.9	-0.493145227432251	-1.017361044883728	-0.65447998046875	-0.24551841616630554	-1.107143759727478	-0.22018644213676453	2.2546496391296387	0.06892189383506775	-3.9668078422546387	-3.0316545963287354	-3.3550310134887695	-4.37033748626709	-5.7067060470581055	-6.396574020385742	-8.454648971557617	-3.71804141998291
ENSG00000197989.13	-0.4924837350845337	-0.8818070888519287	-0.4766708016395569	-0.133122518658638	-0.8257718682289124	-0.1642875373363495	1.2582757472991943	0.07759395241737366	-3.6615359783172607	-2.7429451942443848	-2.990795612335205	-3.8462395668029785	-5.456762313842773	-6.256036758422852	-7.526998996734619	-3.4138545989990234
ENSG00000221539.1	-0.4208471179008484	-0.617540717124939	0.5083796977996826	-0.08835041522979736	-1.808115005493164	0.5842240452766418	1.503321886062622	-0.21736827492713928	-5.185902118682861	-3.511018991470337	-4.3590779304504395	-5.923208713531494	-7.1321868896484375	-7.927618503570557	-10.939271926879883	-4.134944438934326
ENSG00000120656.11	-0.7402522563934326	-0.3084963262081146	-0.02706129103899002	-0.0197104811668396	-0.7278604507446289	-1.2389386892318726	2.3252086639404297	-1.248231291770935	-3.8186094760894775	-3.327313184738159	-3.551609516143799	-4.8436455726623535	-5.792359352111816	-6.586544990539551	-8.05225658416748	-3.740614175796509
ENSG00000229388.1	-0.35157090425491333	-0.25409647822380066	-0.8165273666381836	-0.2568383812904358	-0.6184796094894409	-0.5505415201187134	0.6998217701911926	-0.6402534246444702	-3.5357654094696045	-2.847581148147583	-3.064444065093994	-4.456575870513916	-5.433122634887695	-6.322848320007324	-8.314360618591309	-3.2912466526031494
ENSG00000274978.1	-0.014913950115442276	-0.23729023337364197	0.18191200494766235	-0.568003237247467	0.08967778086662292	0.03868446499109268	0.06985188275575638	-0.4152713716030121	-2.91031551361084	-2.0346367359161377	-1.8269727230072021	-3.420949697494507	-4.534995079040527	-4.381582736968994	-6.333390712738037	-3.1179802417755127
ENSG00000162419.12	-0.41340458393096924	0.07158985733985901	-0.3408622741699219	-0.15273961424827576	-0.1344004124403	-0.37245050072669983	1.97560453414917	0.020490258932113647	-3.8625662326812744	-3.018045663833618	-3.1451339721679688	-4.493975639343262	-5.374575614929199	-6.2367448806762695	-7.61794900894165	-3.525188684463501
ENSG00000252777.1	-0.6837855577468872	0.2330491840839386	-0.17131692171096802	0.3670752942562103	-0.11258435249328613	0.9794673323631287	0.41345861554145813	0.14355283975601196	-2.7692227363586426	-2.909104824066162	-2.2152209281921387	-3.3510427474975586	-3.9437501430511475	-4.411706924438477	-7.09591817855835	-3.0146896839141846
ENSG00000198492.15	-0.8165045976638794	0.26817479729652405	0.26614266633987427	-0.3135913610458374	-0.2735533118247986	-1.394208312034607	4.129196643829346	0.18632039427757263	-3.6586568355560303	-3.395235538482666	-3.5010852813720703	-4.475125789642334	-5.642817497253418	-6.533442974090576	-7.867094993591309	-3.8318991661071777
ENSG00000116329.10	-0.8872017860412598	0.8879406452178955	-0.13268625736236572	-0.038312554359436035	1.3255256414413452	0.24361351132392883	2.733860969543457	-0.37428537011146545	-3.2837579250335693	-2.972935438156128	-2.705232620239258	-4.25602912902832	-4.702182292938232	-5.954960823059082	-6.869619369506836	-3.4252207279205322
ENSG00000233427.1	0.10100288689136505	-0.20630362629890442	-0.41304081678390503	-0.32647639513015747	0.5896585583686829	-0.04667263478040695	0.6324380040168762	-0.0042746663093566895	-3.5777552127838135	-3.2841081619262695	-2.939059257507324	-4.485454559326172	-5.647220611572266	-5.861689567565918	-8.399419784545898	-3.7343368530273438
ENSG00000159023.19	-0.5898463726043701	0.08551087975502014	-0.6949488520622253	-0.5344915390014648	0.870339035987854	1.2781997919082642	5.595821857452393	0.24972209334373474	-3.147723436355591	-3.1310410499572754	-2.741252899169922	-4.199857711791992	-5.771498680114746	-5.827520370483398	-7.64596700668335	-3.7104480266571045
ENSG00000206704.1	-1.0131800174713135	0.2659798264503479	-0.029614068567752838	-0.1977768987417221	0.5184494256973267	1.0934090614318848	0.5265194773674011	-0.9091213941574097	-2.2364180088043213	-1.4791237115859985	-1.3098758459091187	-3.316077709197998	-4.201731204986572	-4.160280704498291	-5.4325103759765625	-2.4051005840301514
ENSG00000277958.1	0.7722757458686829	0.08581742644309998	-0.6692436337471008	0.11219929158687592	-1.1349425315856934	2.4162135124206543	1.0119234323501587	-0.44030097126960754	-2.858398675918579	-1.7591581344604492	-2.2599263191223145	-2.414698362350464	-3.948246717453003	-3.2607240676879883	-5.421807289123535	-3.1369853019714355
ENSG00000253304.1	-0.7646583318710327	-0.023359868675470352	-0.46502482891082764	0.4149264991283417	1.4410935640335083	-0.9560930132865906	2.6949782371520996	-0.16981306672096252	-3.5892140865325928	-2.9779276847839355	-2.744131565093994	-4.157327175140381	-5.4358673095703125	-5.920472621917725	-7.711886882781982	-3.4583630561828613
ENSG00000225750.1	-0.3118022084236145	-0.3251620829105377	-0.28190818428993225	0.4560316503047943	-0.199456587433815	1.044930338859558	0.6731114387512207	-0.38580140471458435	-3.3454177379608154	-1.8241304159164429	-2.0635199546813965	-3.242781162261963	-4.273382186889648	-4.54719877243042	-6.7152934074401855	-3.0198230743408203
ENSG00000116350.16	-0.6698912382125854	-0.0680151879787445	0.2066226601600647	-0.10425177216529846	-1.1361033916473389	0.09372822195291519	3.313495397567749	-0.06066432595252991	-3.802973508834839	-2.9176132678985596	-3.396937847137451	-4.39917516708374	-5.625170707702637	-6.3126726150512695	-7.812262058258057	-3.8349783420562744
ENSG00000116353.15	0.3536454439163208	-0.31611499190330505	-1.069085717201233	-0.20288994908332825	0.148260697722435	0.0012827292084693909	3.5275397300720215	0.15211734175682068	-4.031898498535156	-3.149765729904175	-3.4384779930114746	-4.548219203948975	-5.8141889572143555	-6.5118818283081055	-8.506214141845703	-4.0317702293396
ENSG00000060656.19	-0.8403455018997192	0.2651856243610382	0.2534133791923523	0.02494417130947113	-1.4439427852630615	-0.3310387432575226	1.3357046842575073	0.04748782515525818	-3.731147050857544	-2.8956587314605713	-3.4399471282958984	-3.918569564819336	-5.364545822143555	-5.826274394989014	-7.637582302093506	-3.360074996948242
ENSG00000186056.9	-0.5420559048652649	0.21777155995368958	-1.2313621044158936	-0.2690199613571167	-1.2259879112243652	-0.23146873712539673	0.42805448174476624	0.6250561475753784	-3.3503029346466064	-2.351027488708496	-3.059701919555664	-3.738584041595459	-5.183966636657715	-5.987703800201416	-7.48974609375	-3.70729660987854
ENSG00000162511.7	-1.8016750812530518	-1.8671129941940308	0.601015031337738	-1.150006651878357	-0.949166476726532	-4.284525394439697	2.589890956878662	0.0387021005153656	-2.909940481185913	-3.4125795364379883	-3.55025053024292	-3.7594220638275146	-5.2371063232421875	-6.868473529815674	-8.664100646972656	-4.076417922973633
ENSG00000264773.1	-0.800715446472168	0.12756329774856567	-0.5882985591888428	-0.5579801797866821	0.07149171829223633	-0.24396485090255737	0.023041270673274994	-0.4824999272823334	-3.1923940181732178	-1.522140383720398	-1.4300382137298584	-2.604464530944824	-3.6820476055145264	-4.333555698394775	-6.2648844718933105	-2.3104395866394043
ENSG00000162512.15	0.7539268732070923	0.11606994271278381	1.0477041006088257	0.4643828570842743	-1.785272479057312	-0.14755281805992126	6.378971576690674	-0.5259660482406616	-3.278459310531616	-3.1269819736480713	-3.445781707763672	-4.299592018127441	-5.583670616149902	-6.048617362976074	-7.686381816864014	-3.6529531478881836
ENSG00000134644.15	-0.7454656362533569	0.1114436686038971	0.2975742220878601	0.021328002214431763	-0.6265419125556946	-1.2434390783309937	5.4377923011779785	-0.34605923295021057	-3.77139949798584	-3.317093849182129	-3.516683578491211	-4.351778030395508	-5.609253883361816	-6.3158698081970215	-7.523182392120361	-3.6256263256073
ENSG00000084628.9	0.014861833304166794	0.10057726502418518	-0.8893111944198608	-0.12980163097381592	-0.848578691482544	-0.7520700097084045	1.097459316253662	-0.42380622029304504	-3.753917694091797	-2.548985481262207	-2.940645217895508	-3.4800021648406982	-5.3096160888671875	-5.846096515655518	-8.00222396850586	-3.1146838665008545
ENSG00000060688.12	-0.5435725450515747	-0.058095309883356094	-0.6803063750267029	-0.33901628851890564	-1.1063209772109985	-1.048862099647522	2.7583813667297363	0.05529603362083435	-3.8306884765625	-3.232893943786621	-3.406731128692627	-4.277684688568115	-5.5369462966918945	-6.5371623039245605	-8.093521118164062	-3.6355526447296143
ENSG00000229447.2	-0.819292426109314	-0.5762957334518433	-1.2162693738937378	-0.7085834741592407	-1.2021032571792603	0.7856115102767944	1.2676265239715576	0.1675632894039154	-3.821106433868408	-2.526348352432251	-2.9311399459838867	-3.8524837493896484	-4.568373680114746	-5.909998416900635	-7.017548561096191	-3.4232912063598633
ENSG00000121766.15	0.27835071086883545	-0.7761677503585815	-0.09684652835130692	-0.6378189325332642	-0.4779844284057617	-1.3506523370742798	5.501248359680176	-0.10973110795021057	-3.9311916828155518	-3.323843240737915	-3.432168960571289	-4.500927448272705	-5.825496673583984	-6.633950233459473	-8.40600299835205	-3.442049741744995
ENSG00000229044.1	-0.6016290783882141	-0.4113292992115021	0.3086928427219391	0.23786845803260803	0.4040371775627136	-0.2628241181373596	0.604369580745697	-0.2720327079296112	-4.04997444152832	-2.991529941558838	-3.1992344856262207	-5.108619213104248	-5.618745803833008	-6.684854984283447	-9.499218940734863	-3.996880054473877
ENSG00000121769.7	-0.6769920587539673	-0.7777303457260132	-1.528321623802185	0.003333181142807007	1.6698533296585083	-2.2909576892852783	4.7158589363098145	-0.17787423729896545	-3.0847160816192627	-3.115727424621582	-2.896162509918213	-4.1304707527160645	-5.5231428146362305	-6.497210502624512	-8.687125205993652	-3.2390384674072266
ENSG00000142910.15	0.7188660502433777	-0.07199546694755554	1.6534423828125	1.0580809116363525	-0.7271965742111206	0.2271880805492401	1.423405408859253	0.3046313226222992	-3.5435688495635986	-3.1663761138916016	-3.681959629058838	-4.051280975341797	-5.27031135559082	-5.7604546546936035	-7.362643718719482	-3.7828052043914795
ENSG00000162517.12	-0.15484128892421722	-0.5593909025192261	-0.2056482434272766	0.16059687733650208	-0.04435087740421295	-2.058560848236084	5.549096584320068	-0.24175921082496643	-3.659945249557495	-3.163048267364502	-3.239579677581787	-4.327296257019043	-5.581587791442871	-6.344825744628906	-7.818902969360352	-3.257258892059326
ENSG00000084636.17	-0.16727493703365326	0.020702984184026718	-2.2011520862579346	-0.04850301146507263	-3.01326584815979	0.16686692833900452	3.6827192306518555	0.08892259001731873	-4.212913513183594	-2.453303813934326	-3.6139869689941406	-4.197231292724609	-6.24205207824707	-6.641672134399414	-9.190835952758789	-4.296262741088867
ENSG00000121753.12	1.013696551322937	0.6922174692153931	-0.9678006768226624	0.8894027471542358	-0.04746837913990021	-0.025161348283290863	6.276922702789307	-1.3168033361434937	-3.8899190425872803	-3.372709274291992	-3.2315444946289062	-4.779018878936768	-5.588977813720703	-6.744808197021484	-7.699589252471924	-3.7758591175079346
ENSG00000266580.1	-0.14512436091899872	0.5599695444107056	-2.2817721366882324	1.036913514137268	-0.7720018029212952	1.1740378141403198	2.631822109222412	-1.6059165000915527	-3.276109218597412	-2.432162046432495	-1.5899759531021118	-4.804029941558838	-5.922515869140625	-7.551416873931885	-8.447463035583496	-3.660567045211792
ENSG00000134668.12	-0.4255402684211731	-0.5514830350875854	0.06897144764661789	0.0183427631855011	-0.4221177101135254	0.12021926790475845	0.13430964946746826	0.04085241258144379	-3.305692672729492	-2.880124568939209	-3.1634507179260254	-4.271297454833984	-5.4681854248046875	-6.378808975219727	-8.347338676452637	-3.980952262878418
ENSG00000269967.1	-2.58246111869812	-0.6502385139465332	-0.4605863690376282	-0.04185039550065994	-2.117929458618164	0.49964025616645813	1.5777158737182617	-0.6843465566635132	-3.2622506618499756	-1.835227370262146	-3.1752967834472656	-3.905571222305298	-5.184731483459473	-5.575652122497559	-7.698980331420898	-3.425387382507324
ENSG00000184007.18	0.6365920305252075	-0.9576724767684937	-1.1943596601486206	-0.8620520830154419	-2.732210636138916	-1.3578733205795288	6.711869239807129	0.16943654417991638	-3.2741987705230713	-3.007627010345459	-3.365719795227051	-4.004903793334961	-5.445934295654297	-5.5492262840271	-7.810480117797852	-3.2529261112213135
ENSG00000121774.17	-0.6746886968612671	0.23260989785194397	-0.3211439251899719	-0.5466389656066895	-0.8570654988288879	-1.3583780527114868	5.680119037628174	-0.05532732605934143	-3.837317705154419	-3.501652956008911	-3.655583381652832	-4.796789169311523	-6.154997825622559	-6.7598114013671875	-8.452301979064941	-3.861914873123169
ENSG00000121775.17	-0.5345417857170105	0.5766929388046265	-0.6566966772079468	0.6856056451797485	-0.49197930097579956	-0.12639591097831726	2.1084492206573486	-0.22068455815315247	-3.9647834300994873	-3.0785586833953857	-3.3338279724121094	-4.532513618469238	-5.5406293869018555	-6.348259925842285	-7.8085455894470215	-3.7516379356384277
ENSG00000266203.1	0.5612319707870483	-1.4031379222869873	-0.7860613465309143	0.0774354338645935	-2.0338919162750244	1.8469101190567017	1.8561996221542358	-1.0500621795654297	-3.8592913150787354	-2.870110034942627	-4.118102073669434	-4.355708599090576	-6.158846855163574	-5.638554096221924	-8.454279899597168	-4.040754795074463
ENSG00000025800.13	-0.7120579481124878	0.33612409234046936	0.5800144076347351	-0.016114145517349243	-0.5007665753364563	-1.0745818614959717	4.7981486320495605	0.019382566213607788	-3.606837511062622	-3.367103338241577	-3.4352011680603027	-4.363556861877441	-5.346014022827148	-6.259759902954102	-7.1818437576293945	-3.7222342491149902
ENSG00000084652.15	-0.5562050342559814	-0.31925663352012634	0.40493398904800415	0.4913152754306793	-1.444224238395691	-0.6289134621620178	4.176510810852051	0.2746375501155853	-4.069396495819092	-3.3685336112976074	-3.678189277648926	-4.755166053771973	-6.010427474975586	-6.577883720397949	-7.990379810333252	-3.753401279449463
ENSG00000160050.14	0.26022475957870483	0.17753866314888	-0.2830362319946289	-0.12699826061725616	-0.005125358700752258	-0.6832782626152039	1.486632227897644	-0.9290692806243896	-3.583479166030884	-3.084890365600586	-3.265239715576172	-4.4904937744140625	-5.267294883728027	-6.063711643218994	-7.69393253326416	-3.7185888290405273
ENSG00000224066.1	0.3443034887313843	0.019422080367803574	-0.8063961267471313	-0.08280935883522034	-0.7674573063850403	1.5299489498138428	2.0607259273529053	-0.4708789885044098	-4.638872146606445	-2.703331232070923	-3.440840244293213	-4.796922206878662	-6.379604339599609	-7.436739921569824	-9.690387725830078	-4.273148059844971
ENSG00000160051.11	-0.49158352613449097	0.40992429852485657	-0.4019838571548462	0.0707552433013916	-0.0631691962480545	-0.552115261554718	1.5109198093414307	-0.7228826284408569	-3.415881395339966	-2.9465420246124268	-3.213897228240967	-4.641421318054199	-5.109892845153809	-6.368326187133789	-7.609399318695068	-3.2380738258361816
ENSG00000160055.19	-0.15714727342128754	-0.6644915342330933	-0.921809732913971	0.07989758253097534	-0.9810847640037537	0.49450913071632385	2.6363015174865723	-0.7153505086898804	-4.6100382804870605	-3.247649908065796	-3.368553638458252	-5.008510112762451	-6.30909538269043	-7.36838436126709	-9.132936477661133	-3.7747933864593506
ENSG00000084623.11	-0.38119518756866455	-0.6099504232406616	0.2435256838798523	-0.01350221037864685	-0.5895496606826782	-2.309460163116455	5.777328968048096	-0.011637598276138306	-3.95819354057312	-3.5254249572753906	-3.483527183532715	-4.45565128326416	-5.801642417907715	-6.733183860778809	-8.275689125061035	-3.4822797775268555
ENSG00000220785.7	-0.020285774022340775	-0.3599909245967865	-1.2273932695388794	0.3909672200679779	-1.4646133184432983	-0.1082250103354454	1.4101672172546387	-1.047227144241333	-4.293765068054199	-2.9081451892852783	-3.316753387451172	-4.50195837020874	-5.667046546936035	-6.834567546844482	-8.753931999206543	-3.3287463188171387
ENSG00000183615.5	-0.5068584680557251	-0.6022742390632629	0.5391989946365356	0.4335780441761017	-0.3170066475868225	0.038818903267383575	0.2689480483531952	-0.49905237555503845	-3.9651834964752197	-2.6879045963287354	-3.351925849914551	-3.927865982055664	-5.242053031921387	-5.309800148010254	-8.16489315032959	-3.516462802886963
ENSG00000116478.11	-0.418315589427948	-0.5975147485733032	0.1682766079902649	-0.3031634986400604	-2.0770881175994873	-0.43774768710136414	2.712310791015625	-0.8163686990737915	-4.0352935791015625	-3.260009527206421	-3.5634918212890625	-4.575895309448242	-5.634294509887695	-6.487776756286621	-8.253885269165039	-3.694664239883423
ENSG00000175130.6	0.05325378105044365	0.25570884346961975	-1.5684574842453003	-0.39323851466178894	-4.287193298339844	-2.4120073318481445	6.209892272949219	-0.2161659300327301	-2.8353490829467773	-2.7315101623535156	-3.69728946685791	-3.4462311267852783	-5.133640289306641	-5.4815897941589355	-6.673508167266846	-3.4934146404266357
ENSG00000233775.1	-0.36408013105392456	-0.05829969421029091	-0.3802620768547058	-0.041500404477119446	-0.4695451855659485	0.030296914279460907	0.12098664045333862	-0.5090599656105042	-3.453578472137451	-2.795631170272827	-2.900395393371582	-4.222853660583496	-4.99576473236084	-5.754773139953613	-7.373860836029053	-3.362847089767456
ENSG00000162526.6	-0.026815135031938553	0.06481906771659851	-0.7760758996009827	-0.05723200738430023	-0.7739080786705017	0.598362922668457	0.6478054523468018	0.175306499004364	-3.5574440956115723	-2.318272352218628	-2.8859047889709473	-3.5716660022735596	-5.200281143188477	-5.6877593994140625	-7.366112232208252	-3.2588486671447754
ENSG00000225828.1	-0.3234248161315918	-0.2790764272212982	-0.6145399808883667	0.692225456237793	-1.035373330116272	0.6825609803199768	1.20360267162323	-0.06308361887931824	-3.8663926124572754	-2.2138373851776123	-2.9840383529663086	-3.712123394012451	-5.28059196472168	-5.758370876312256	-8.09642219543457	-3.4923582077026367
ENSG00000160058.18	-0.10197626054286957	0.09305873513221741	0.00671570748090744	-0.06691280007362366	-0.9209969639778137	-0.756214439868927	4.807638645172119	-0.21462765336036682	-3.827681303024292	-3.3686747550964355	-3.546133518218994	-4.59739351272583	-5.708044052124023	-6.521385192871094	-7.961920738220215	-3.7928688526153564
ENSG00000273274.1	-0.41644030809402466	-0.21681591868400574	-0.04979989677667618	-0.2159072458744049	-0.28071337938308716	0.046277277171611786	0.2797638773918152	-0.35527631640434265	-3.5054798126220703	-2.5990688800811768	-3.0932531356811523	-3.9429187774658203	-4.942808151245117	-5.5965962409973145	-7.312841892242432	-3.52553653717041
ENSG00000160062.14	0.06861729919910431	0.14877226948738098	-0.46628454327583313	-0.49433761835098267	0.23190809786319733	-0.16663819551467896	1.148653268814087	0.3033962547779083	-3.5913078784942627	-3.077057361602783	-3.279438018798828	-4.5296478271484375	-5.458418846130371	-6.1069746017456055	-7.894716262817383	-3.6631016731262207
ENSG00000176261.15	0.20608915388584137	-0.9707940816879272	-0.6569892764091492	-0.3915201723575592	-0.5225523710250854	-0.08988066762685776	3.207508087158203	-0.13815823197364807	-4.014528751373291	-3.221341609954834	-3.3683857917785645	-4.469282627105713	-5.712674140930176	-6.329190731048584	-8.727261543273926	-3.5652215480804443
ENSG00000162521.18	-0.14187048375606537	0.01631179079413414	0.2933834195137024	-0.9169178009033203	-1.0749181509017944	-0.7350228428840637	4.745311737060547	-0.10829058289527893	-3.5784523487091064	-3.176316261291504	-3.325590133666992	-4.0760722160339355	-5.404529571533203	-5.950406074523926	-7.502151012420654	-3.5803091526031494
ENSG00000162520.14	-0.5054579377174377	-0.2824661433696747	1.0823596715927124	-1.2758744955062866	-1.7224370241165161	-0.02766343206167221	1.4339163303375244	-1.5280967950820923	-3.7408649921417236	-3.0418787002563477	-3.7757740020751953	-4.768136024475098	-6.220166206359863	-7.106817245483398	-9.25441837310791	-4.205189228057861
ENSG00000162522.10	0.20587314665317535	-0.8261295557022095	0.502614438533783	0.8756794929504395	-0.38307827711105347	1.336815595626831	3.0253443717956543	-0.7955077886581421	-3.483125925064087	-2.407674551010132	-3.00227689743042	-4.333221435546875	-5.287042617797852	-6.0522871017456055	-8.017536163330078	-3.2576258182525635
ENSG00000134684.10	-1.3637982606887817	0.2865888178348541	-0.9452194571495056	0.19635197520256042	1.1366702318191528	-1.74404776096344	5.05626916885376	0.27702245116233826	-3.234031915664673	-3.070687770843506	-2.5799756050109863	-3.8534774780273438	-4.88824462890625	-5.507717609405518	-7.040996074676514	-3.0337252616882324
ENSG00000116497.17	-1.1184017658233643	-0.4129980504512787	-0.7703303694725037	-0.4393649995326996	-0.48285502195358276	0.7908753752708435	4.045569896697998	-0.243953138589859	-3.834638833999634	-2.9541432857513428	-2.903613567352295	-4.214736461639404	-5.817456245422363	-6.322113037109375	-7.793551921844482	-3.595139741897583
ENSG00000160097.15	0.5243203639984131	-0.10031017661094666	0.45812588930130005	0.19119206070899963	0.5505743622779846	-0.19668027758598328	3.3496017456054688	-0.7712661027908325	-3.983999013900757	-3.4171199798583984	-3.314955711364746	-4.669229507446289	-5.189414024353027	-6.394549369812012	-7.627136707305908	-3.6698367595672607
ENSG00000121905.9	0.10974802076816559	0.111337810754776	-2.3610596656799316	0.563561201095581	1.4279569387435913	-2.940687656402588	10.984919548034668	-0.6725143194198608	-2.4472243785858154	-3.2915239334106445	-2.384007215499878	-3.606720447540283	-5.446748733520508	-5.29536247253418	-7.735459804534912	-3.261583089828491
ENSG00000121900.18	-0.011038530617952347	-1.0399199724197388	0.5812099575996399	0.3305288851261139	-1.8313220739364624	-0.8059383630752563	2.911593437194824	-1.3744770288467407	-3.7992351055145264	-3.0608561038970947	-3.5886263847351074	-4.407218933105469	-5.923372268676758	-6.454401969909668	-8.148892402648926	-3.6439144611358643
ENSG00000116514.16	-0.7433613538742065	-0.5624741315841675	0.3052552342414856	0.41619983315467834	-0.3894766569137573	-1.5106306076049805	3.6817445755004883	-0.40952005982398987	-3.819679021835327	-3.2611019611358643	-3.484316825866699	-4.8182854652404785	-5.58512020111084	-6.604562759399414	-7.916703701019287	-3.587953567504883
ENSG00000004455.16	-0.4721583127975464	-0.8586660623550415	-0.4168253540992737	-0.4350365698337555	-1.8938392400741577	-0.45795223116874695	3.5088894367218018	-0.20515838265419006	-3.910418748855591	-3.12902569770813	-3.366366386413574	-4.5684967041015625	-5.936801910400391	-6.580211162567139	-8.394563674926758	-3.5514113903045654
ENSG00000276645.1	-0.17986758053302765	-0.16646268963813782	-0.6348161101341248	-0.11200505495071411	-0.48303163051605225	0.7002958655357361	0.7605685591697693	-0.26726582646369934	-3.856981039047241	-3.333339214324951	-3.153578281402588	-5.0667314529418945	-6.757458686828613	-6.343454360961914	-9.314201354980469	-3.9038450717926025
ENSG00000142920.16	-0.49987149238586426	1.061962366104126	-2.169978380203247	-0.3595053553581238	-1.2812433242797852	-0.5996482968330383	2.7048285007476807	-0.8509267568588257	-3.9488513469696045	-3.015324592590332	-3.324991226196289	-4.741217136383057	-5.623559951782227	-6.447273254394531	-8.317425727844238	-3.7670459747314453
ENSG00000278997.1	-1.3204238414764404	-0.17237892746925354	-0.804954469203949	0.006461501121520996	-1.7640126943588257	0.5386272072792053	0.8000015616416931	-0.34690114855766296	-3.69592022895813	-2.3869211673736572	-3.2357258796691895	-4.600391387939453	-5.367891311645508	-5.66386079788208	-8.160185813903809	-3.700249195098877
ENSG00000116525.13	-0.7644377946853638	0.595885157585144	-0.9715692400932312	0.027532964944839478	-2.383355140686035	-0.46106603741645813	1.9916725158691406	0.13904210925102234	-3.500964641571045	-2.6583807468414307	-3.5966663360595703	-3.945099353790283	-5.222113609313965	-6.230508804321289	-7.738692760467529	-3.657968044281006
ENSG00000279179.1	-0.3794294595718384	0.1248399019241333	-0.17390301823616028	0.6005223989486694	-0.6062507629394531	0.724141538143158	0.4615152180194855	-0.27228033542633057	-3.374119281768799	-2.406379461288452	-2.714395046234131	-3.635082721710205	-5.032998085021973	-5.165747165679932	-7.865776538848877	-3.2019193172454834
ENSG00000160094.14	0.01424623653292656	-0.20110520720481873	-0.28075987100601196	0.8443584442138672	-0.8348673582077026	-0.13695892691612244	3.6697745323181152	-0.5055476427078247	-3.864711046218872	-3.158341884613037	-3.3919677734375	-4.522468090057373	-5.784904479980469	-6.442631721496582	-8.068367958068848	-3.812349796295166
ENSG00000270115.1	-0.6146379113197327	0.3931894600391388	-0.21624797582626343	0.36067768931388855	-1.3586783409118652	1.5636391639709473	1.9582350254058838	-0.6983135938644409	-3.463435173034668	-1.98392653465271	-2.997795581817627	-3.9438016414642334	-5.213658332824707	-5.2984795570373535	-7.621964931488037	-3.3905045986175537
ENSG00000134686.17	-0.275066614151001	-0.34782251715660095	-0.04890985041856766	0.4592759907245636	-1.4960401058197021	-0.32748934626579285	4.799663066864014	1.047620177268982	-3.8358843326568604	-3.341864585876465	-3.4785361289978027	-4.212893962860107	-5.800902366638184	-6.479320526123047	-7.961264133453369	-3.754434823989868
ENSG00000222112.1	-0.9984078407287598	-0.8746041059494019	-1.1281061172485352	0.10955879092216492	-1.8833321332931519	1.3887364864349365	2.9249041080474854	0.4088030755519867	-3.9302775859832764	-2.788242816925049	-3.0356717109680176	-4.487473964691162	-5.3503570556640625	-6.419066429138184	-9.12868595123291	-3.431976318359375
ENSG00000121903.14	-0.8191652297973633	0.1596161425113678	-0.275238037109375	-0.16069084405899048	-0.8026465773582458	-0.23952952027320862	1.9052553176879883	-0.5759377479553223	-3.8076930046081543	-3.036215305328369	-3.51339054107666	-4.734174728393555	-5.484565734863281	-6.254687786102295	-7.459564208984375	-3.76464581489563
ENSG00000121904.17	-0.5686280131340027	0.9701143503189087	-1.267162561416626	0.21582111716270447	0.011256709694862366	0.9418147206306458	2.7077555656433105	-0.50334632396698	-3.9941399097442627	-2.576819896697998	-2.5301318168640137	-4.262397766113281	-5.5356245040893555	-6.386061191558838	-7.6664934158325195	-3.540841817855835
ENSG00000207941.1	-1.1217681169509888	-0.24663051962852478	-0.6610730290412903	0.18535968661308289	0.8615872859954834	0.8674702048301697	0.9832757115364075	-0.22986075282096863	-2.094909429550171	-1.453270435333252	-2.461671829223633	-3.292983293533325	-4.0371198654174805	-5.353108882904053	-5.886125087738037	-2.0309555530548096
ENSG00000163866.8	-0.1339850276708603	-0.6866077184677124	-0.39970993995666504	0.1500982642173767	0.46896207332611084	-0.1827920377254486	3.3292126655578613	-0.053002744913101196	-3.9933395385742188	-3.1089067459106445	-3.0406484603881836	-4.67671537399292	-5.509742736816406	-6.425337314605713	-7.943411350250244	-3.4298460483551025
ENSG00000255811.1	-0.6347362995147705	-0.6434917449951172	0.11902623623609543	0.6764775514602661	-0.4800296425819397	1.3009233474731445	0.8537344932556152	-0.7078845500946045	-3.739633083343506	-2.3796334266662598	-2.3673958778381348	-3.862205982208252	-5.004929542541504	-5.149939060211182	-8.024560928344727	-2.859518527984619
ENSG00000187513.8	0.2555668354034424	0.2718048393726349	1.8454965353012085	0.8023389577865601	-0.5963016748428345	0.001345314085483551	1.3555971384048462	1.2533363103866577	-3.975919008255005	-3.299079418182373	-3.2134451866149902	-3.6662561893463135	-5.286869049072266	-6.286653518676758	-6.9116387367248535	-3.899777412414551
ENSG00000116544.11	1.3250328302383423	0.2120911180973053	-1.1683849096298218	0.8937569856643677	0.42919570207595825	0.39094558358192444	7.236927509307861	-2.11790132522583	-3.053480625152588	-2.8755874633789062	-2.43632435798645	-4.293906211853027	-5.231832504272461	-5.890616416931152	-7.22286319732666	-3.162998676300049
ENSG00000241014.1	0.5361866354942322	-0.05979034677147865	-0.3065498173236847	-0.3827808201313019	-0.4069961905479431	0.6503416895866394	0.8505492806434631	0.7965421676635742	-3.748598337173462	-2.7902259826660156	-3.2973861694335938	-4.03558349609375	-5.8447771072387695	-6.123894214630127	-8.275684356689453	-4.002677917480469
ENSG00000243749.1	-0.2435101419687271	0.1450638473033905	0.014161460101604462	-0.41441860795021057	0.042633697390556335	-0.20826438069343567	0.12600865960121155	-0.41548952460289	-3.9240634441375732	-2.8439781665802	-2.998849391937256	-4.345486640930176	-5.5306901931762695	-6.153746128082275	-7.439833164215088	-3.6718454360961914
ENSG00000163867.16	-0.4792720079421997	-0.2370513379573822	-0.5144808292388916	-0.7223070859909058	-0.1756618469953537	0.28541818261146545	2.0788402557373047	-0.1478157341480255	-3.687934160232544	-3.0830564498901367	-3.1060476303100586	-4.371735572814941	-5.533851623535156	-6.027578353881836	-7.488641262054443	-3.626485586166382
ENSG00000197056.9	-0.40759873390197754	-0.1313823163509369	0.0241539403796196	-0.8669642210006714	-0.9896358847618103	-0.055966101586818695	2.048090934753418	-0.367147833108902	-3.819214105606079	-3.1220510005950928	-3.4050564765930176	-4.256242752075195	-5.369958877563477	-6.326511383056641	-7.336091041564941	-3.513723850250244
ENSG00000116560.10	-1.0826529264450073	-0.05061039701104164	-0.4335981011390686	-0.42506828904151917	-1.9775563478469849	0.10756603628396988	5.716883182525635	-0.7240461111068726	-3.8043205738067627	-2.873716115951538	-3.2306642532348633	-4.634985446929932	-5.628073692321777	-6.382533550262451	-7.991601467132568	-3.4632527828216553
ENSG00000146463.11	-0.08273838460445404	-0.416705459356308	-0.12192768603563309	-0.662223219871521	-0.4959653615951538	-0.6636434197425842	5.041182994842529	-0.6446312665939331	-3.5527737140655518	-2.998901128768921	-3.13602352142334	-4.216248989105225	-5.182428359985352	-5.892419338226318	-7.416157245635986	-3.1733062267303467
ENSG00000201542.1	-0.8546328544616699	-0.3144572079181671	-0.9520382285118103	-0.17959988117218018	-0.3102654218673706	0.9219951033592224	0.9133895635604858	-0.3556987941265106	-4.635155200958252	-2.8897764682769775	-2.97243070602417	-4.606996059417725	-5.533324241638184	-6.6610188484191895	-9.155740737915039	-4.008424282073975
ENSG00000229994.1	-0.6952223777770996	-0.10624286532402039	-0.5914078950881958	0.2922360301017761	-1.2023075819015503	1.419392466545105	1.3157804012298584	-0.5800968408584595	-3.8477067947387695	-2.2595252990722656	-2.9416956901550293	-4.15707540512085	-5.351973533630371	-5.528957843780518	-8.583906173706055	-3.315155267715454
ENSG00000142687.17	-0.16259203851222992	0.17999044060707092	0.1254153847694397	0.20286038517951965	-0.5066720843315125	-0.11894913762807846	4.47252082824707	0.3378623425960541	-3.9450278282165527	-3.2990055084228516	-3.4691500663757324	-4.525975704193115	-5.6322431564331055	-6.476881980895996	-7.594971656799316	-3.789433717727661
ENSG00000020129.15	-0.6752139329910278	-0.596298098564148	-1.2138522863388062	0.9537012577056885	0.9466454386711121	-1.7283443212509155	10.298198699951172	-0.17989292740821838	-3.130915403366089	-3.2275447845458984	-2.760356903076172	-3.835930347442627	-5.2548418045043945	-5.637614727020264	-7.325226783752441	-3.3307206630706787
ENSG00000239636.1	-0.9717562198638916	-0.275221586227417	-0.16165590286254883	0.45843443274497986	-0.26103365421295166	0.12448614090681076	0.33676281571388245	-0.6958928108215332	-4.203421592712402	-2.861821174621582	-2.912436008453369	-4.361628532409668	-5.20479679107666	-6.218484401702881	-8.741595268249512	-3.5176990032196045
ENSG00000116819.6	-0.4811064600944519	-0.2668564021587372	-1.3760462999343872	0.3407200574874878	-0.8888247609138489	0.7380585670471191	1.6624783277511597	0.8941147327423096	-4.070550441741943	-2.3684046268463135	-2.8088784217834473	-3.8843650817871094	-5.491091728210449	-5.896020412445068	-8.331775665283203	-3.5959553718566895
ENSG00000126067.11	-0.14616845548152924	0.37801995873451233	-0.43606263399124146	-0.20997831225395203	-0.3131101131439209	-1.453192114830017	3.9646215438842773	0.4970570504665375	-3.83341383934021	-3.4027891159057617	-3.398745059967041	-4.548680305480957	-5.653165817260742	-6.583281517028809	-7.841078758239746	-3.6356213092803955
ENSG00000142686.7	-0.32165277004241943	-0.3586810529232025	-0.20530015230178833	-0.03965166211128235	1.1365755796432495	-1.8901469707489014	4.849219799041748	0.264852374792099	-3.3736464977264404	-3.2060439586639404	-3.072512626647949	-4.074011325836182	-5.193572044372559	-5.898934364318848	-7.12904691696167	-3.3947391510009766
ENSG00000092853.13	-0.34070929884910583	-0.2842300236225128	0.12948748469352722	-0.2556351125240326	0.11277882009744644	-0.15563341975212097	0.18629351258277893	-0.043146371841430664	-3.6652214527130127	-2.8514626026153564	-3.254757881164551	-4.274913787841797	-5.168387413024902	-5.7710957527160645	-7.677188396453857	-3.3879201412200928
ENSG00000134698.10	0.06921912729740143	0.02377333864569664	-0.35024958848953247	-0.5491453409194946	-1.0202189683914185	0.3514513075351715	3.5981926918029785	0.1518000066280365	-3.890413284301758	-3.165537118911743	-3.588355541229248	-4.669901371002197	-5.922476768493652	-6.621529579162598	-8.081257820129395	-3.842475414276123
ENSG00000092847.11	0.06100834533572197	0.2895626127719879	0.08099465817213058	-0.18609657883644104	-1.0973364114761353	0.05160311609506607	4.311980247497559	-0.6293977499008179	-3.8308916091918945	-3.1080410480499268	-3.423790454864502	-4.554399490356445	-5.504390716552734	-6.1972737312316895	-7.612097263336182	-3.568516731262207
ENSG00000271914.1	0.007581900805234909	0.044620331376791	-0.6603299975395203	-0.15782415866851807	-0.20690344274044037	-0.06787725538015366	0.14889484643936157	0.18908396363258362	-3.375577449798584	-2.33627986907959	-3.0549025535583496	-4.059248924255371	-5.367861747741699	-5.553155422210693	-7.576822757720947	-3.5750608444213867
ENSG00000126070.19	-1.1239222288131714	-0.08631095290184021	-0.2127426266670227	-0.6143311262130737	-1.3279852867126465	0.2825031578540802	3.069689989089966	-0.2440449297428131	-3.960139274597168	-2.913527250289917	-3.38311767578125	-4.316771984100342	-5.428211212158203	-6.282491683959961	-7.642887115478516	-3.6356098651885986
ENSG00000092850.11	-0.5813625454902649	0.14876647293567657	-0.1545226275920868	-1.1540924310684204	-1.8254886865615845	0.3061773478984833	0.7175549864768982	-2.248168706893921	-4.584441661834717	-3.590597152709961	-4.1669111251831055	-5.870373249053955	-7.173314094543457	-8.256577491760254	-10.737876892089844	-4.749688148498535
ENSG00000116863.10	-1.0342351198196411	0.4148968756198883	-0.397361695766449	0.17723509669303894	-1.133903980255127	-2.0458922386169434	3.309295892715454	-0.238138347864151	-3.823157548904419	-3.281784772872925	-3.5582332611083984	-4.71115255355835	-5.6758222579956055	-6.664002418518066	-8.212541580200195	-3.8621060848236084
ENSG00000171812.11	-0.8200494647026062	-0.06808391213417053	0.11500989645719528	-0.38619542121887207	-0.9124352335929871	-0.9788446426391602	0.2893555760383606	-0.9008371829986572	-3.75122332572937	-3.0985560417175293	-3.8065648078918457	-5.0587477684021	-5.852482795715332	-6.859679222106934	-8.636065483093262	-4.6574931144714355
ENSG00000054116.11	-0.011005986481904984	-0.4096549451351166	-0.35702627897262573	-0.19522079825401306	-0.03776450455188751	-1.504921555519104	3.7394309043884277	-0.37528195977211	-3.8471741676330566	-3.464033603668213	-3.4089932441711426	-4.620596885681152	-5.706717491149902	-6.599815368652344	-8.353160858154297	-3.5555341243743896
ENSG00000116871.15	-0.2035120576620102	0.15910688042640686	-1.0723854303359985	0.997411847114563	-1.9550172090530396	-1.1849299669265747	5.334604740142822	-0.005748182535171509	-3.583887815475464	-3.0988364219665527	-3.642606735229492	-4.37562894821167	-5.540390968322754	-6.323793888092041	-7.4733452796936035	-3.6473615169525146
ENSG00000054118.13	0.00493539497256279	0.38414159417152405	0.13791579008102417	-0.2679186761379242	-1.233389973640442	-1.0620845556259155	5.7494635581970215	0.46535786986351013	-3.8455872535705566	-3.4421792030334473	-3.802814483642578	-4.64088249206543	-6.063885688781738	-6.8407745361328125	-8.378121376037598	-3.880711793899536
ENSG00000214193.9	0.3804463744163513	-0.6217081546783447	-0.22705447673797607	0.7069838047027588	-0.4105760455131531	1.090451717376709	1.9134647846221924	0.10793396830558777	-4.015964508056641	-2.425246000289917	-2.955214500427246	-3.90069317817688	-5.36530876159668	-6.1639723777771	-8.582083702087402	-3.585155725479126
ENSG00000142694.6	0.09040401875972748	-0.17815926671028137	0.6301776170730591	1.3393760919570923	-0.8183713555335999	-0.5685423016548157	0.6632022261619568	-0.3868330419063568	-3.1925559043884277	-3.06268572807312	-3.3496932983398438	-4.567169189453125	-4.930403709411621	-5.893901824951172	-7.1056084632873535	-3.735219717025757
ENSG00000116883.8	0.015536259859800339	-0.5048679113388062	-0.4778352379798889	0.2924356162548065	0.27048808336257935	0.7912453413009644	1.9485857486724854	-0.06872358918190002	-4.010250091552734	-2.574057102203369	-3.108025074005127	-4.41087532043457	-5.013269424438477	-6.466266632080078	-8.085968017578125	-3.6132965087890625
ENSG00000196182.10	-0.19803331792354584	-0.3580363690853119	0.93470698595047	0.9462404251098633	-0.9169068932533264	-0.31047919392585754	2.530453681945801	-0.7703942060470581	-4.065885066986084	-2.99629545211792	-3.389108657836914	-4.633996963500977	-5.508546829223633	-6.704349994659424	-7.884546279907227	-3.621375322341919
ENSG00000181817.5	0.21179868280887604	-0.9190396070480347	-0.5138499140739441	0.5743323564529419	0.06171505153179169	-1.3542612791061401	3.166701316833496	-0.8505121469497681	-3.7863659858703613	-2.865544557571411	-2.9862046241760254	-4.274095058441162	-5.407486915588379	-6.03957462310791	-7.886203289031982	-3.1929678916931152
ENSG00000116885.18	-0.5247365236282349	0.3384222090244293	0.15852826833724976	-0.29399117827415466	0.4354954957962036	-1.0464459657669067	3.250476360321045	-0.6330057382583618	-4.270163059234619	-3.49888277053833	-3.5615997314453125	-4.76204252243042	-6.137297630310059	-7.132082939147949	-8.728079795837402	-3.6808135509490967
ENSG00000201448.1	-0.611142635345459	-0.5253664255142212	-2.529694080352783	0.3001693785190582	0.1120857447385788	-1.6830600500106812	3.4913411140441895	-1.3161803483963013	-4.333858966827393	-4.069027900695801	-4.262368202209473	-6.931532382965088	-8.458456993103027	-8.603737831115723	-10.809161186218262	-5.388925552368164
ENSG00000116898.11	0.11118866503238678	-0.6684318780899048	-0.6936464905738831	-0.3911261260509491	0.20515672862529755	-0.9602667689323425	3.789490222930908	-0.464956670999527	-3.813642740249634	-3.1535592079162598	-3.1500988006591797	-4.200430870056152	-5.362909317016602	-6.507476806640625	-8.015693664550781	-3.370732307434082
ENSG00000119535.17	-0.32178428769111633	-1.4266955852508545	-0.8144362568855286	-0.37930211424827576	-1.0097496509552002	-0.5977957844734192	0.8422713875770569	-0.28074607253074646	-3.638568639755249	-2.963954210281372	-3.3018345832824707	-4.4026079177856445	-5.492036819458008	-6.120859146118164	-8.364696502685547	-3.8116328716278076
ENSG00000163873.9	-0.2940429449081421	1.0041664838790894	-0.7766287922859192	-0.18007490038871765	0.08551205694675446	-0.18186435103416443	2.7884669303894043	-0.3389226496219635	-3.170659065246582	-2.9380805492401123	-3.1841630935668945	-4.063903331756592	-5.091983795166016	-5.53751277923584	-6.877558708190918	-3.2388155460357666
ENSG00000223944.1	-0.6753702163696289	-0.11462071537971497	-0.6994145512580872	-0.1850677728652954	-0.05094228684902191	0.12512201070785522	0.6260016560554504	-0.3864302933216095	-2.970249891281128	-3.1829590797424316	-2.7114672660827637	-4.022461891174316	-4.741113662719727	-5.751155853271484	-8.08916187286377	-3.8141427040100098
ENSG00000252368.1	-0.8307607173919678	-0.6392475366592407	-0.8292750120162964	0.09721079468727112	-0.07531414926052094	0.7499642372131348	0.18372517824172974	-0.5718213319778442	-3.0538840293884277	-2.2091424465179443	-3.475407600402832	-4.648679733276367	-4.933282852172852	-5.406735420227051	-8.8217191696167	-4.532513618469238
ENSG00000233621.1	-0.2091882973909378	0.27954956889152527	-0.06733227521181107	-0.20198944211006165	-1.2244805097579956	-0.03835081309080124	0.8114454746246338	0.10379722714424133	-3.597740888595581	-2.7660069465637207	-3.298412322998047	-3.9781041145324707	-5.380246162414551	-6.2214131355285645	-8.345146179199219	-3.63801646232605
ENSG00000163874.9	-0.05066891387104988	-0.753440260887146	1.1731454133987427	0.6069588661193848	-0.7328723669052124	0.056359000504016876	0.45074376463890076	-0.010018080472946167	-3.698047161102295	-2.459552049636841	-3.0312376022338867	-3.895540475845337	-4.875130653381348	-5.183557987213135	-7.365444660186768	-3.155460834503174
ENSG00000163875.15	-0.7955708503723145	-0.709246039390564	-0.5041407942771912	-0.7041674852371216	0.41349560022354126	-1.5128395557403564	4.768200397491455	0.08564075827598572	-3.8866934776306152	-3.270322561264038	-3.287334442138672	-4.517820835113525	-5.816644668579102	-6.811282157897949	-8.617742538452148	-3.6406378746032715
ENSG00000263675.1	-2.5859501361846924	-0.8172518014907837	-1.668765664100647	-0.7297135591506958	-2.1774678230285645	0.6595162749290466	3.0296406745910645	-1.2504161596298218	-4.136488437652588	-3.371448040008545	-4.361927509307861	-4.663683891296387	-6.6214752197265625	-7.782168865203857	-10.326333999633789	-5.596992492675781
ENSG00000163877.9	-0.47989851236343384	0.10829034447669983	0.3530762195587158	-0.03249436616897583	-0.31112009286880493	-0.8334408402442932	2.281111478805542	0.06833943724632263	-3.5051393508911133	-3.3165159225463867	-3.4929046630859375	-4.730037212371826	-5.545261383056641	-6.641481399536133	-7.984662055969238	-3.7985477447509766
ENSG00000237749.4	-0.02158992365002632	0.15212002396583557	-0.7610110640525818	2.02209734916687	0.13552825152873993	-0.9736084938049316	0.5446547865867615	-0.233502596616745	-3.9093549251556396	-3.1493375301361084	-3.674182891845703	-5.089385986328125	-6.343296051025391	-6.5697102546691895	-9.83485221862793	-4.347918510437012
ENSG00000163879.10	-0.9044904708862305	-0.5018571615219116	1.1988189220428467	-1.4468492269515991	-2.6101441383361816	0.22600606083869934	1.8715258836746216	-2.324997901916504	-3.8731229305267334	-2.7507309913635254	-3.6309738159179688	-5.28385066986084	-6.466353416442871	-6.530246734619141	-9.683972358703613	-4.603724479675293
ENSG00000134697.12	-0.46662312746047974	0.15447106957435608	0.1127282902598381	-0.35755953192710876	-0.541874349117279	-0.8698416352272034	2.242781639099121	0.30437788367271423	-3.7039172649383545	-3.171053409576416	-3.365818500518799	-4.44890022277832	-5.501309394836426	-6.462190628051758	-8.058053970336914	-3.6229350566864014
ENSG00000116922.14	-0.12806819379329681	0.09716430306434631	0.1159888431429863	-0.464827299118042	0.29786813259124756	-0.7815008759498596	2.2867212295532227	-0.09379139542579651	-4.143139362335205	-3.530198574066162	-3.380185604095459	-4.798573017120361	-6.016078948974609	-6.947490692138672	-8.718341827392578	-3.8197548389434814
ENSG00000134690.10	-0.4464840888977051	0.03899019584059715	-0.39193421602249146	-0.039912253618240356	-0.18181820213794708	-0.1827700138092041	0.3104604482650757	-0.15147873759269714	-3.382202625274658	-2.809751510620117	-3.074233055114746	-4.262600898742676	-5.05119514465332	-5.595861434936523	-7.072516441345215	-3.5669286251068115
ENSG00000183317.16	-0.253379225730896	0.2431110441684723	-0.6496205925941467	0.5516573190689087	0.6494095921516418	0.633627712726593	3.1585888862609863	-0.6453984975814819	-3.5387613773345947	-2.972458839416504	-2.790255546569824	-4.402352809906006	-5.225767135620117	-6.464878559112549	-7.343631744384766	-4.011366844177246
ENSG00000200421.1	-1.7225226163864136	0.14889129996299744	-0.23858821392059326	-0.9656887054443359	-0.1888994723558426	2.3501150608062744	1.080217719078064	-1.266334891319275	-3.407193183898926	-1.8956360816955566	-1.9956330060958862	-3.7018954753875732	-4.5887675285339355	-4.462704181671143	-6.988269805908203	-4.162271499633789
ENSG00000227416.2	0.07537190616130829	-0.18881869316101074	-0.17147955298423767	0.0119495689868927	0.27225440740585327	0.5743422508239746	0.34154582023620605	-0.41087231040000916	-4.033330917358398	-2.7566769123077393	-2.776240825653076	-4.029829978942871	-5.411375999450684	-5.267905235290527	-7.878118515014648	-3.648841619491577
ENSG00000185090.14	-0.49769389629364014	0.9708670377731323	-0.05682487040758133	0.09635737538337708	0.921721339225769	-0.7492788434028625	3.7348086833953857	-0.3164133131504059	-3.675022840499878	-3.4840776920318604	-3.2840871810913086	-4.381634712219238	-5.38261604309082	-5.926025390625	-7.43389368057251	-3.642893075942993
ENSG00000196449.3	-0.40437638759613037	-0.37911257147789	0.020053498446941376	-0.268436998128891	-0.22273750603199005	-1.5122512578964233	2.1327733993530273	-0.3647531569004059	-4.170149326324463	-3.203934669494629	-3.33516788482666	-4.768078327178955	-5.779609680175781	-6.992151260375977	-8.387716293334961	-3.6512768268585205
ENSG00000197982.13	1.3570839166641235	-0.7252899408340454	-0.8204280734062195	0.35174664855003357	-1.5959893465042114	-1.631388545036316	3.8430545330047607	-0.465052992105484	-3.462989568710327	-3.0577027797698975	-3.344273567199707	-4.1331024169921875	-5.409825325012207	-5.458315372467041	-7.233316898345947	-3.236191511154175
ENSG00000188786.9	-0.5120479464530945	0.12686005234718323	0.3401305079460144	-0.23369371891021729	-1.2936159372329712	-0.2926945388317108	2.6993985176086426	-0.37000933289527893	-3.7558648586273193	-3.1010639667510986	-3.6158103942871094	-4.587393760681152	-5.716732978820801	-6.386525630950928	-7.9753546714782715	-3.8431880474090576
ENSG00000204084.12	-0.39746105670928955	-0.3593115508556366	-0.3917009234428406	-0.05592775344848633	-1.779585599899292	0.05847910791635513	1.9681557416915894	-0.22553375363349915	-4.205857753753662	-3.02522873878479	-3.627932548522949	-4.6374616622924805	-5.988226890563965	-6.888305187225342	-8.898761749267578	-4.003807067871094
ENSG00000183431.11	-0.4719730615615845	0.2665688097476959	0.15332823991775513	-0.1771622598171234	-0.20077939331531525	-1.4693230390548706	3.9736227989196777	0.27067074179649353	-3.690899610519409	-3.4610981941223145	-3.3800549507141113	-4.425774097442627	-5.612178802490234	-6.505342960357666	-7.994221210479736	-3.773998737335205
ENSG00000212541.1	0.13558578491210938	-0.39793652296066284	-0.13056576251983643	-0.6157526969909668	0.3244587779045105	-0.03052596189081669	0.03580055385828018	-0.24445423483848572	-2.5165700912475586	-1.530441403388977	-2.692267417907715	-2.9124462604522705	-3.819230556488037	-4.053582191467285	-6.018886089324951	-3.098048210144043
ENSG00000183386.9	-0.1906978338956833	-0.1995973289012909	0.24695760011672974	0.386944979429245	-1.218475103378296	-0.45097091794013977	0.9209754467010498	-0.26804688572883606	-3.1955227851867676	-3.0292084217071533	-3.143998146057129	-4.419848442077637	-5.515522003173828	-6.074956893920898	-8.299623489379883	-3.7812910079956055
ENSG00000183520.11	-0.0982733815908432	0.13733449578285217	-0.458313524723053	-0.47113046050071716	-0.2578763961791992	-1.0948656797409058	3.0156702995300293	0.02251395583152771	-4.117755889892578	-3.3741135597229004	-3.3647255897521973	-4.756640911102295	-5.978745460510254	-6.989163875579834	-8.960806846618652	-3.7746341228485107
ENSG00000185668.7	0.3019557595252991	0.9496910572052002	-0.5345468521118164	1.0741199254989624	0.8214980959892273	-0.433001309633255	1.9664249420166016	-1.1595505475997925	-3.637110948562622	-2.962714195251465	-3.0224828720092773	-3.911208152770996	-5.064688682556152	-5.767240047454834	-6.761168479919434	-3.538414239883423
ENSG00000224592.5	-0.01721750572323799	-0.6477724313735962	-0.7280312180519104	0.10464045405387878	1.0745593309402466	0.2535213530063629	3.2436492443084717	-0.5620397329330444	-3.544748067855835	-2.799886465072632	-2.768535614013672	-4.039012432098389	-5.042003631591797	-5.846679210662842	-7.405402660369873	-3.6296839714050293
ENSG00000265596.1	-0.9464299082756042	-0.2388065755367279	-2.512660026550293	0.8960119485855103	0.3235301971435547	0.8520137667655945	1.4266016483306885	-0.3566652834415436	-4.802842617034912	-3.4515490531921387	-3.3881630897521973	-5.089015007019043	-8.224326133728027	-8.381688117980957	-11.814374923706055	-5.521123886108398
ENSG00000275350.1	-0.3410441279411316	-0.19686856865882874	-0.02108028531074524	0.08608782291412354	-0.37163448333740234	0.5385221838951111	0.1532822549343109	-0.5064581632614136	-3.0980796813964844	-2.4330062866210938	-2.503251075744629	-3.4601731300354004	-4.210898399353027	-4.481274604797363	-6.8119893074035645	-3.260782480239868
ENSG00000116954.7	-0.4863440990447998	-0.07692942023277283	0.38687700033187866	-0.7055748701095581	-0.13302136957645416	-0.8833044767379761	2.1286933422088623	-0.14814940094947815	-3.6084682941436768	-3.0886945724487305	-3.2344555854797363	-4.225276470184326	-5.169066429138184	-5.937346935272217	-6.947707176208496	-3.4290578365325928
ENSG00000228436.2	-0.2242557853460312	-0.6588774919509888	-0.5125848650932312	0.5647052526473999	-1.0509910583496094	0.761655867099762	3.0984039306640625	-0.9567402601242065	-3.5253000259399414	-2.438843250274658	-3.1017823219299316	-4.3399434089660645	-5.579217910766602	-5.924769401550293	-8.41262435913086	-3.7636353969573975
ENSG00000214114.8	-0.21098670363426208	-0.2063380777835846	0.7936469316482544	-0.9246134757995605	-0.622742235660553	0.0036365464329719543	0.6246021389961243	-0.8656866550445557	-4.0814127922058105	-3.506000518798828	-3.8622026443481445	-5.015206336975098	-6.1430768966674805	-7.023787498474121	-9.073205947875977	-4.440607070922852
ENSG00000158315.10	-0.11183981597423553	0.7911041975021362	-2.0194814205169678	-1.2108060121536255	-2.1773133277893066	-1.245954155921936	1.5091829299926758	0.21546420454978943	-3.003354072570801	-2.8037774562835693	-3.5290470123291016	-4.4446611404418945	-5.205599784851074	-5.668315887451172	-7.2877702713012695	-3.979268789291382
ENSG00000199963.1	-0.5120141506195068	-0.8881677389144897	-0.4023645520210266	0.9983631372451782	-0.4441838264465332	0.8664363026618958	0.7841724753379822	-1.0557142496109009	-2.177610397338867	-1.2937064170837402	-1.9389145374298096	-2.6262574195861816	-3.0544371604919434	-4.185695171356201	-6.231053829193115	-2.274214744567871
ENSG00000174574.15	0.02849043533205986	-0.34376606345176697	0.47092288732528687	-0.7015914916992188	-1.2450846433639526	-1.182639479637146	5.480148792266846	-0.3165678083896637	-3.467674493789673	-3.268625497817993	-3.19553279876709	-4.014315128326416	-5.318370819091797	-6.102413654327393	-7.153598308563232	-3.4640300273895264
ENSG00000168653.10	0.662979006767273	-1.3724106550216675	-1.4859522581100464	-0.217264324426651	-0.16929860413074493	-2.3942341804504395	9.10071849822998	0.2091260850429535	-3.2452590465545654	-3.452157497406006	-3.101809024810791	-3.892289638519287	-5.5329389572143555	-6.278014659881592	-8.185958862304688	-3.0234122276306152
ENSG00000127603.23	-0.2534445524215698	0.02369990572333336	0.531117856502533	0.1983107626438141	-2.541609287261963	0.3976062834262848	6.09311580657959	-0.393179327249527	-3.6285603046417236	-3.0232200622558594	-3.3701353073120117	-4.488809108734131	-5.851164817810059	-6.117315292358398	-7.747364044189453	-3.464376449584961
ENSG00000270040.1	-0.38912642002105713	-0.17192545533180237	0.21359485387802124	-0.7337311506271362	-0.8120343685150146	1.1885756254196167	0.9919161200523376	-0.09063467383384705	-3.889763593673706	-3.3977973461151123	-3.26627254486084	-5.269149303436279	-5.974327087402344	-6.068076133728027	-8.414741516113281	-3.614008665084839
ENSG00000183682.7	0.11438451707363129	-0.7493940591812134	-0.038296349346637726	0.3543976843357086	-0.5725122094154358	0.39293375611305237	1.4663825035095215	0.23915550112724304	-3.7446672916412354	-3.0244288444519043	-3.4367198944091797	-4.348047256469727	-5.498291969299316	-6.228801727294922	-7.734854221343994	-3.278686285018921
ENSG00000237624.1	-0.21691270172595978	-0.5077748894691467	-0.26525962352752686	0.14228790998458862	-0.3072311282157898	0.2548331916332245	0.30209779739379883	-0.1438584327697754	-3.790592908859253	-2.320481538772583	-3.2061495780944824	-3.957029104232788	-5.404753684997559	-5.380842685699463	-8.061288833618164	-3.2469582557678223
ENSG00000182109.7	-0.6617724299430847	-0.09588393568992615	-0.769826352596283	0.36977291107177734	-1.2637031078338623	0.7018653154373169	1.633345603942871	-0.3843672573566437	-4.453555107116699	-2.741673707962036	-3.200039863586426	-4.627301216125488	-5.661210060119629	-6.799582481384277	-9.372339248657227	-3.7930705547332764
ENSG00000243970.1	-0.9130974411964417	-0.23935768008232117	-0.5170838236808777	0.04013422131538391	-1.5260772705078125	1.0222986936569214	2.3556196689605713	-0.38987329602241516	-4.713022232055664	-2.5761547088623047	-3.475935935974121	-4.574002265930176	-6.507746696472168	-7.658061981201172	-9.620551109313965	-4.246301651000977
ENSG00000090621.13	-0.5581709146499634	-0.9183007478713989	-0.44240325689315796	0.09122833609580994	-0.6729581952095032	-1.060949683189392	3.352712631225586	-0.16542163491249084	-4.085500240325928	-3.244819402694702	-3.5255227088928223	-4.711668491363525	-5.9981279373168945	-6.981653690338135	-8.413307189941406	-3.722384214401245
ENSG00000201457.1	-0.6940898299217224	0.4274400770664215	-1.1545653343200684	-1.0479798316955566	-1.2298715114593506	0.853330671787262	1.907088041305542	0.133246511220932	-4.16015625	-3.688286781311035	-3.923398494720459	-5.466175556182861	-7.14510440826416	-7.635234832763672	-9.460400581359863	-4.964061737060547
ENSG00000163909.7	1.6267186403274536	0.08163991570472717	0.900120735168457	0.10314401984214783	-0.8329644799232483	0.8494033813476562	2.276520013809204	0.4336378276348114	-2.463357448577881	-2.414222478866577	-2.9878759384155273	-3.062690258026123	-5.0193071365356445	-5.557415962219238	-7.206729888916016	-3.0580990314483643
ENSG00000116981.3	0.6708222031593323	0.9267847537994385	-0.6405009627342224	-0.17494148015975952	-0.8355435132980347	0.02516017109155655	1.6808797121047974	-1.137658715248108	-3.324084520339966	-2.2911200523376465	-2.926316738128662	-4.257480144500732	-5.780576705932617	-5.884063720703125	-8.195743560791016	-3.1640028953552246
ENSG00000116983.12	0.02141965553164482	-0.9791287183761597	0.3632435202598572	-0.22784867882728577	0.9282726645469666	-0.9636645913124084	6.9634575843811035	-1.5812796354293823	-3.431878089904785	-2.896923780441284	-2.9682741165161133	-4.524023056030273	-6.064601898193359	-6.24269962310791	-8.374285697937012	-3.349562168121338
ENSG00000084072.16	-0.1784304827451706	0.16367104649543762	-0.6646519899368286	-0.31115472316741943	-0.6877428293228149	-0.8355110287666321	1.8879594802856445	-0.02121320366859436	-3.822129964828491	-2.8920862674713135	-3.419823169708252	-4.577143669128418	-5.352411270141602	-6.304021835327148	-7.752132415771484	-3.396284818649292
ENSG00000225333.6	-0.3457164466381073	0.22568988800048828	0.024101965129375458	-0.33483123779296875	-0.36142849922180176	0.6074252128601074	0.37900158762931824	-0.7058768272399902	-3.322953462600708	-2.36576771736145	-3.0301904678344727	-3.83262038230896	-4.971493721008301	-5.549990177154541	-7.692918300628662	-3.3782382011413574
ENSG00000116985.11	-0.4685005843639374	-0.0767880380153656	-0.5161715149879456	-0.1627502143383026	-0.8517314791679382	-0.3813227415084839	1.0950380563735962	0.3302450478076935	-3.6603996753692627	-2.951275110244751	-3.6234631538391113	-4.530828475952148	-5.434587478637695	-6.468644142150879	-7.706134796142578	-3.9274208545684814
ENSG00000198754.5	-0.13561555743217468	-0.4611589312553406	-0.6379653811454773	0.0745629072189331	-0.5919839143753052	0.14310669898986816	0.2807117998600006	0.05385732650756836	-3.619584560394287	-2.7631001472473145	-3.2855582237243652	-4.162808418273926	-5.290105819702148	-5.899631977081299	-7.639523983001709	-3.645949125289917
ENSG00000043514.15	-0.5263698101043701	-0.5188411474227905	-0.6769101023674011	-0.7314275503158569	-0.2731781005859375	0.24635031819343567	3.869136333465576	0.6296910047531128	-3.9009203910827637	-2.9761931896209717	-3.2673897743225098	-4.540525913238525	-6.026348114013672	-6.64198112487793	-8.329544067382812	-3.5016801357269287
ENSG00000202222.1	-1.3386539220809937	0.3465849459171295	-0.16889172792434692	-0.23850956559181213	-1.4041398763656616	1.8162999153137207	2.962236166000366	0.44013962149620056	-4.007603168487549	-2.5949230194091797	-3.082488536834717	-4.0099287033081055	-5.269505500793457	-5.713830471038818	-7.585021018981934	-3.700895309448242
ENSG00000116990.10	-0.23770113289356232	0.1456754505634308	0.06331145018339157	0.1089804470539093	0.5918406844139099	-0.3883441090583801	0.9581500887870789	0.05283799767494202	-3.797034502029419	-3.2890548706054688	-3.3406763076782227	-4.637134075164795	-5.681724548339844	-6.4519171714782715	-8.000585556030273	-3.726497173309326
ENSG00000168389.17	1.2030235528945923	1.0787287950515747	1.7474852800369263	0.4237256944179535	-1.2692290544509888	0.05174211412668228	2.7736575603485107	-0.10085740685462952	-4.219757080078125	-3.356618881225586	-3.4473252296447754	-5.125680446624756	-6.476454734802246	-6.78969669342041	-8.662052154541016	-3.9522132873535156
ENSG00000228477.1	0.262234091758728	-0.07833877205848694	0.4102475047111511	0.6692742109298706	-0.7256848216056824	0.4687514007091522	0.6986452341079712	-1.090344786643982	-3.4886927604675293	-2.167848587036133	-3.1885643005371094	-3.8672873973846436	-5.146166801452637	-5.4275641441345215	-8.566143035888672	-3.1449146270751953
ENSG00000131236.16	-0.32689154148101807	1.1839734315872192	-0.7223616242408752	-0.2552424967288971	0.18330316245555878	-3.1998729705810547	6.80124044418335	-1.0867069959640503	-3.15767240524292	-3.2234907150268555	-2.6846137046813965	-3.6012701988220215	-4.639373779296875	-5.8815083503723145	-6.58134126663208	-3.060030221939087
ENSG00000131238.16	-0.3535507917404175	0.0018106959760189056	0.6070274710655212	-0.8741660118103027	-0.46331995725631714	-2.1246399879455566	6.001319885253906	-0.4907630980014801	-3.3030245304107666	-3.394355058670044	-3.3992257118225098	-4.069137096405029	-5.323675155639648	-6.224129676818848	-7.297860622406006	-3.5424060821533203
ENSG00000117000.8	-0.2789198160171509	-0.3026922643184662	-0.2124829888343811	-0.9821420907974243	-0.468813955783844	-0.34846433997154236	4.782795429229736	-0.0923408567905426	-3.2650701999664307	-2.8667376041412354	-2.9130544662475586	-3.874373435974121	-4.963113784790039	-5.747718811035156	-7.311318397521973	-2.9826488494873047
ENSG00000207508.1	-1.6746577024459839	-0.43062326312065125	-0.9732160568237305	-0.5200530290603638	-1.0556055307388306	0.034208692610263824	1.2808341979980469	-0.6878424882888794	-3.2893333435058594	-1.7076122760772705	-2.8189821243286133	-3.9515364170074463	-5.4644269943237305	-6.368293762207031	-8.213329315185547	-3.587676763534546
ENSG00000259943.1	0.2806229591369629	-0.5403536558151245	-1.1201703548431396	-1.475016713142395	-0.10692735016345978	-1.3165775537490845	3.5693109035491943	0.8715053796768188	-3.678293466567993	-2.658364772796631	-3.017143726348877	-3.8592350482940674	-6.053577423095703	-6.214479446411133	-8.612435340881348	-3.446892738342285
ENSG00000084073.8	-0.6721713542938232	0.2566916048526764	0.7861890196800232	-1.071816086769104	-0.787578821182251	-1.19053316116333	4.381545066833496	-0.7751888036727905	-3.4438467025756836	-3.2004783153533936	-3.0665364265441895	-4.152578830718994	-5.143008232116699	-5.8168745040893555	-6.787841796875	-3.3699586391448975
ENSG00000049089.13	0.7314786911010742	0.9568356275558472	-2.8678531646728516	-0.1505521833896637	-3.0646088123321533	-1.2670719623565674	3.994565010070801	0.3349517285823822	-2.830474615097046	-2.305506944656372	-3.0152549743652344	-3.516021490097046	-4.87995719909668	-5.040373802185059	-7.12694787979126	-2.9021830558776855
ENSG00000084070.11	-0.4138439893722534	0.18937650322914124	-0.8841968178749084	0.20818307995796204	0.8460171818733215	-1.9452234506607056	5.881278991699219	-0.051576048135757446	-3.2024757862091064	-2.8955655097961426	-2.573686361312866	-3.5129923820495605	-4.6724700927734375	-5.842365264892578	-6.766146183013916	-3.129079818725586
ENSG00000187801.14	-0.8385008573532104	-0.010980937629938126	-0.576551616191864	-0.10166135430335999	0.9992457032203674	0.48755016922950745	3.867156744003296	-0.5742417573928833	-3.7455050945281982	-3.183786392211914	-3.1712851524353027	-4.533830165863037	-5.321382522583008	-6.7298078536987305	-8.278984069824219	-3.818157434463501
ENSG00000260920.2	-1.49739408493042	-0.12293276190757751	-0.1986227035522461	-0.3142383098602295	1.257464051246643	0.31915250420570374	2.971771717071533	-0.5528725385665894	-3.0404746532440186	-2.3623368740081787	-2.5450499057769775	-3.833589553833008	-4.679745674133301	-5.786598205566406	-7.1513543128967285	-3.144826650619507
ENSG00000279667.1	-0.9387472867965698	0.09242066740989685	0.00038280338048934937	-0.17187851667404175	0.37786227464675903	0.5412725806236267	0.7630414366722107	0.21082735061645508	-3.5984926223754883	-2.298698902130127	-2.477069616317749	-3.624920129776001	-5.303808212280273	-5.500588417053223	-7.9854230880737305	-3.296513080596924
ENSG00000187815.9	0.040508102625608444	0.8895914554595947	-0.45622551441192627	-0.5772799849510193	0.35691457986831665	-0.6006917357444763	1.7909576892852783	-0.730520486831665	-3.921966075897217	-3.465546131134033	-3.4045491218566895	-4.56088924407959	-5.840299606323242	-6.597241401672363	-8.441351890563965	-3.914792776107788
ENSG00000238287.1	-0.4568871855735779	-0.27862104773521423	-1.0155397653579712	-0.19980865716934204	-0.5919500589370728	0.28171488642692566	1.346394419670105	-0.6328707933425903	-4.28645133972168	-3.151947021484375	-3.3472847938537598	-4.770962238311768	-5.551575660705566	-6.13193416595459	-8.386360168457031	-3.685004472732544
ENSG00000164002.11	-0.030254829674959183	-0.13291463255882263	0.10751669853925705	-0.2641027569770813	0.6662148833274841	-0.4531550109386444	2.6745591163635254	0.39577850699424744	-3.8196709156036377	-2.776613235473633	-3.5132622718811035	-4.248578071594238	-6.057297706604004	-6.408914566040039	-8.186741828918457	-3.375070095062256
ENSG00000117010.15	-0.031060505658388138	0.12451568245887756	-0.8094696402549744	-0.9079265594482422	-0.5139234662055969	-0.0773935541510582	1.8808836936950684	-0.4758770763874054	-3.8291471004486084	-3.0906076431274414	-3.2164926528930664	-4.592566013336182	-5.517711639404297	-6.543606281280518	-8.354960441589355	-3.7835772037506104
ENSG00000236505.1	-0.3555511236190796	0.2622739374637604	-0.5537952780723572	0.027261704206466675	0.03707042336463928	0.18865802884101868	1.3970415592193604	0.7454777956008911	-2.9240548610687256	-2.281219005584717	-2.029667854309082	-3.8303840160369873	-4.324396133422852	-5.727041721343994	-7.645547866821289	-3.590574026107788
ENSG00000117016.9	0.4770897626876831	-0.9918221235275269	-0.15583068132400513	0.023778527975082397	1.2838629484176636	-0.14152154326438904	6.574706554412842	0.22112759947776794	-3.344604015350342	-3.2495956420898438	-3.033169746398926	-4.193536758422852	-5.584382057189941	-6.26284122467041	-7.99948263168335	-3.232412815093994
ENSG00000237899.1	-0.42646878957748413	-0.08520439267158508	-0.7555608153343201	0.12263448536396027	0.050370797514915466	0.005567707121372223	0.2331376075744629	0.00926104187965393	-4.134876251220703	-2.79233980178833	-2.948979377746582	-4.376469612121582	-5.305930137634277	-6.471421718597412	-8.966005325317383	-4.12766695022583
ENSG00000272145.1	-0.07435755431652069	-0.3971874415874481	-1.6889649629592896	-0.31413859128952026	-0.8287210464477539	0.30715247988700867	1.7343180179595947	-0.02207806706428528	-3.6247570514678955	-2.6650032997131348	-2.716200351715088	-4.024106502532959	-5.2249755859375	-5.998974800109863	-7.63964319229126	-3.2877197265625
ENSG00000066136.20	-0.7228704690933228	0.08201208710670471	-0.3101562261581421	0.35921594500541687	-0.43402373790740967	-0.4690491855144501	2.7156524658203125	-0.5488990545272827	-3.8320043087005615	-3.0957608222961426	-3.3351378440856934	-4.45286750793457	-5.5009355545043945	-5.8917999267578125	-7.658397674560547	-3.620326280593872
ENSG00000198974.3	-0.4833625853061676	-0.14599648118019104	0.8111066222190857	-0.21986599266529083	-0.7231675386428833	0.3498589098453522	1.041210412979126	-1.2212759256362915	-3.1535141468048096	-2.149148941040039	-3.139158248901367	-3.2197041511535645	-5.403042793273926	-6.268190383911133	-8.258115768432617	-4.306609630584717
ENSG00000207962.1	-0.6830825209617615	-0.25053486227989197	-0.10020292550325394	0.4059379994869232	0.03857502341270447	-0.662395179271698	0.8823410868644714	-0.13292351365089417	-1.7733466625213623	-2.1365506649017334	-1.1087696552276611	-3.2442808151245117	-4.0589823722839355	-3.9596612453460693	-5.004441738128662	-2.3038175106048584
ENSG00000117013.14	0.22592712938785553	0.0362333320081234	-0.4369601011276245	0.5051488876342773	-0.0714651495218277	0.9408231973648071	1.680588722229004	-0.6485692262649536	-3.4627621173858643	-2.3190879821777344	-2.681774616241455	-3.9993555545806885	-4.977377891540527	-5.556955337524414	-7.39376163482666	-3.2706801891326904
ENSG00000179862.6	-0.274597704410553	-0.01921055093407631	0.19081825017929077	-0.06540143489837646	-0.6030446887016296	-0.9436795711517334	1.1649014949798584	0.1742320954799652	-3.1408121585845947	-2.6923108100891113	-3.1644186973571777	-3.421273708343506	-4.6910319328308105	-5.506907939910889	-6.837889671325684	-3.5947844982147217
ENSG00000171793.13	-0.3950469493865967	0.32516947388648987	-0.6698493957519531	-0.22716006636619568	0.2315746396780014	-0.2814888656139374	2.581589937210083	0.6137012243270874	-3.8989274501800537	-3.0077028274536133	-3.12929630279541	-4.180576801300049	-5.199497222900391	-6.055882453918457	-7.695757865905762	-3.4344160556793213
ENSG00000281207.1	-0.01493646577000618	-0.029745671898126602	-0.25547879934310913	0.43978485465049744	-0.6104189157485962	0.7958439588546753	0.5289191007614136	-0.06598767638206482	-3.5206868648529053	-2.6874887943267822	-3.047412395477295	-3.9924426078796387	-5.082376480102539	-5.3238348960876465	-7.704031944274902	-3.398238182067871
ENSG00000171790.15	-0.572482705116272	-0.36969467997550964	-0.2776389718055725	0.4437585175037384	-0.19400475919246674	0.3420816957950592	0.24518969655036926	-0.6198527812957764	-3.524683713912964	-2.4571759700775146	-2.6470937728881836	-3.829981803894043	-4.9863176345825195	-5.078218936920166	-7.76930570602417	-3.0337064266204834
ENSG00000010803.16	0.7713770866394043	-0.7238303422927856	-0.0370681956410408	-0.17784461379051208	-0.307358980178833	0.45043888688087463	4.195189952850342	-0.1466614305973053	-3.6406333446502686	-2.940877676010132	-2.8481602668762207	-4.258241653442383	-5.481645584106445	-6.1658735275268555	-7.555708885192871	-3.1898977756500244
ENSG00000235358.1	-0.01371227577328682	-0.12413090467453003	0.016997821629047394	0.15781614184379578	-0.20622111856937408	0.44920119643211365	0.23587745428085327	-0.34028199315071106	-3.2087035179138184	-2.48547101020813	-2.668449878692627	-3.708179235458374	-4.493528366088867	-5.0779314041137695	-6.711914539337158	-2.75134539604187
ENSG00000204060.6	0.21908985078334808	0.5000717639923096	-0.49791219830513	0.9421852827072144	0.0698491558432579	0.016228802502155304	0.7728360295295715	-0.3067447245121002	-3.295060157775879	-2.5743372440338135	-3.0124902725219727	-4.007680892944336	-4.915589332580566	-5.785940647125244	-7.370450019836426	-3.49068021774292
ENSG00000127124.14	-0.24850378930568695	-0.006770346313714981	-0.20142114162445068	0.5987762212753296	-0.6249020099639893	1.0249966382980347	2.122225284576416	-0.8014892339706421	-3.598198413848877	-2.1796250343322754	-2.8313684463500977	-4.071423530578613	-5.447404861450195	-5.898687839508057	-8.199539184570312	-3.2788569927215576
ENSG00000198815.8	-0.840829610824585	-0.1856454312801361	0.32036811113357544	-0.3297538459300995	-0.16147871315479279	-0.6489408612251282	4.611495494842529	0.17088112235069275	-3.8522660732269287	-3.2092268466949463	-3.276533603668213	-4.458775997161865	-5.616006851196289	-6.421467304229736	-7.588603973388672	-3.6664962768554688
ENSG00000177181.14	0.25540077686309814	-0.023024890571832657	-1.036820650100708	-0.6331332921981812	1.6639394760131836	-0.6551432013511658	3.826087713241577	-0.44540563225746155	-3.1049554347991943	-2.818469524383545	-2.4920921325683594	-4.094747066497803	-4.9800825119018555	-5.771572113037109	-7.257835865020752	-3.2896134853363037
ENSG00000066185.12	-0.17287732660770416	-0.20200762152671814	0.49780088663101196	-1.2161084413528442	-1.0218828916549683	-0.12706202268600464	1.3374884128570557	-1.9889458417892456	-3.6262547969818115	-2.984736442565918	-3.337771415710449	-4.575263023376465	-5.577363014221191	-6.359287261962891	-8.086172103881836	-3.5678720474243164
ENSG00000127125.8	0.6273219585418701	-0.5675960779190063	-0.18773680925369263	-0.8344990015029907	-0.22709961235523224	-1.2845882177352905	3.3351073265075684	-0.44397392868995667	-3.5957462787628174	-2.907843589782715	-3.3715829849243164	-4.399560451507568	-5.343279838562012	-6.391873359680176	-8.01444149017334	-3.169182538986206
ENSG00000186409.14	-0.3569977879524231	-0.5250805616378784	0.024755112826824188	-0.7138534784317017	-0.24703125655651093	0.786390483379364	2.4327211380004883	-0.9020838737487793	-3.9525909423828125	-3.041010856628418	-3.225233554840088	-4.531189918518066	-5.749527931213379	-6.6902289390563965	-8.721043586730957	-3.667501926422119
ENSG00000230116.1	-0.5089161396026611	0.27127012610435486	-0.19273307919502258	-0.01960211992263794	-0.6223533749580383	1.2728416919708252	0.6792808771133423	-0.7317103147506714	-3.098191499710083	-2.315819025039673	-2.4770755767822266	-3.4077680110931396	-4.7468695640563965	-5.139352798461914	-7.334549427032471	-3.2405052185058594
ENSG00000236876.3	1.3825491666793823	-1.3308194875717163	-0.30555397272109985	-2.5681841373443604	-0.7156998515129089	-2.0685784816741943	5.50790548324585	0.34191712737083435	-3.2572154998779297	-3.188445568084717	-2.719379425048828	-3.9616682529449463	-4.3308868408203125	-6.262476921081543	-8.1019287109375	-2.8233909606933594
ENSG00000200254.1	-0.9051764011383057	-0.2579318583011627	-0.3754756450653076	-0.0820663571357727	-0.7593750357627869	2.00791072845459	1.1924092769622803	-0.11907175183296204	-3.1539881229400635	-1.8989287614822388	-2.3173961639404297	-2.79436993598938	-5.188624382019043	-4.549765586853027	-6.9427876472473145	-2.711434841156006
ENSG00000236180.2	-0.7545499801635742	0.023977424949407578	-0.414470911026001	-0.3625184893608093	-0.17966009676456451	1.428234338760376	0.7505378127098083	-0.36190780997276306	-3.1172797679901123	-2.0339205265045166	-2.110752582550049	-3.100543975830078	-4.492481231689453	-4.388739585876465	-6.696968078613281	-3.299687385559082
ENSG00000171960.10	0.017293822020292282	-0.3933621346950531	-1.0330289602279663	-0.21789884567260742	0.21998558938503265	-1.5235846042633057	3.078348159790039	0.2480076253414154	-3.8933234214782715	-3.4335153102874756	-3.2222328186035156	-4.357222557067871	-5.965909957885742	-6.7447075843811035	-8.830974578857422	-3.548647403717041
ENSG00000234917.2	-0.14095322787761688	0.18386784195899963	-0.5939467549324036	-0.4820621609687805	0.5207594037055969	-0.1040969118475914	0.9158238768577576	-0.09798136353492737	-3.3996145725250244	-2.8291468620300293	-2.8557281494140625	-4.621898174285889	-4.741864204406738	-5.641594409942627	-7.670321941375732	-3.6817288398742676
ENSG00000065978.18	0.02849210426211357	-0.46792635321617126	0.45642226934432983	-0.11193469166755676	-2.1741952896118164	-1.7650134563446045	6.027431011199951	-0.33961859345436096	-3.9221527576446533	-3.327057361602783	-3.76291561126709	-4.555367946624756	-6.020912170410156	-6.950217247009277	-8.610136032104492	-3.6643307209014893
ENSG00000117385.15	-0.3736622929573059	-0.18196997046470642	-0.5801163911819458	0.2992192804813385	-0.8450816869735718	0.42394933104515076	1.4749765396118164	0.13097235560417175	-4.136998653411865	-2.870738983154297	-3.392207622528076	-4.367429733276367	-5.660750389099121	-6.516202926635742	-8.390191078186035	-3.688499927520752
ENSG00000164008.14	0.23610271513462067	-0.6059081554412842	-0.22738772630691528	-0.9690942764282227	0.09393720328807831	-0.0019503459334373474	1.5831879377365112	0.06440183520317078	-3.91359543800354	-3.3071610927581787	-3.2097043991088867	-4.644726276397705	-5.608366012573242	-6.349278926849365	-8.51298999786377	-3.6287338733673096
ENSG00000274386.5	-0.13301919400691986	-0.039280716329813004	-0.03621266037225723	-0.18315976858139038	0.03197823464870453	0.24821323156356812	0.280635803937912	0.08470286428928375	-3.6846179962158203	-2.5951836109161377	-2.9263601303100586	-4.090371608734131	-5.263235092163086	-5.817929267883301	-7.648088455200195	-3.483767509460449
ENSG00000177868.11	0.2925962209701538	-0.8018842935562134	-1.023048996925354	-0.2672424018383026	-0.6607854962348938	-1.4597599506378174	3.031524419784546	-0.47885528206825256	-3.836273670196533	-2.8867485523223877	-3.2031097412109375	-4.607857704162598	-5.7588043212890625	-6.719009876251221	-8.212584495544434	-3.708155632019043
ENSG00000164010.13	0.24503876268863678	-0.1322854459285736	0.005188159644603729	-0.8144245147705078	-0.39664024114608765	-0.3565174639225006	2.3813469409942627	-0.6022652387619019	-3.8796229362487793	-2.875227212905884	-3.056847095489502	-4.436322212219238	-5.285093307495117	-6.451154708862305	-7.8980278968811035	-3.5561816692352295
ENSG00000228192.7	-0.038251716643571854	-0.2310751974582672	-0.15880408883094788	-0.2083551585674286	-0.43609243631362915	-0.25757360458374023	0.2064472734928131	-0.20408350229263306	-3.801130533218384	-3.281604290008545	-3.463041305541992	-4.602799415588379	-5.4687957763671875	-6.7145562171936035	-8.2885160446167	-4.0839128494262695
ENSG00000164011.17	-0.4887886643409729	0.24130740761756897	-0.5725151896476746	-0.24582520127296448	-1.081488013267517	-0.4198194444179535	2.1616439819335938	-0.3459080755710602	-3.9054906368255615	-3.345348596572876	-3.579537868499756	-4.779464244842529	-5.660755157470703	-6.894554138183594	-8.076601028442383	-3.9747774600982666
ENSG00000225099.1	-0.38144856691360474	0.2719574272632599	-0.4981025159358978	-0.17686809599399567	0.45072025060653687	-0.5164194703102112	0.40616899728775024	0.4389210641384125	-3.3976194858551025	-3.1002485752105713	-2.509861946105957	-3.9230449199676514	-4.879360198974609	-5.445192337036133	-7.275175094604492	-4.160257816314697
ENSG00000117394.19	1.5263592004776	0.7615581750869751	2.3719630241394043	0.7662798166275024	-1.9223383665084839	0.04100839048624039	5.408013820648193	1.654126763343811	-3.377445936203003	-3.710681915283203	-3.6225905418395996	-3.8330631256103516	-5.537919998168945	-6.313998222351074	-6.978447437286377	-4.127350807189941
ENSG00000227533.5	0.024588655680418015	-0.14178165793418884	-0.17323285341262817	-0.1487671285867691	-0.3987380862236023	1.0345841646194458	1.519421100616455	-0.2857990562915802	-3.3759610652923584	-2.9349586963653564	-3.0919203758239746	-4.2001729011535645	-5.5415544509887695	-5.794618129730225	-7.8654680252075195	-3.694270610809326
ENSG00000207256.1	-0.8207492232322693	-0.8021553754806519	-1.2183023691177368	-0.08186592906713486	-0.32610565423965454	0.8324537873268127	0.60580974817276	0.2970711886882782	-4.802659034729004	-2.79364275932312	-2.7868871688842773	-4.061733722686768	-6.097667694091797	-5.744844913482666	-8.740336418151855	-4.054577350616455
ENSG00000186973.10	-0.44148480892181396	-0.16372397541999817	0.8826140761375427	-2.5239672660827637	-2.776151418685913	0.104057677090168	0.7385777831077576	-4.45982551574707	-5.078427314758301	-4.029394149780273	-5.071307182312012	-7.4913201332092285	-9.525225639343262	-9.849213600158691	-14.383087158203125	-6.650976657867432
ENSG00000117395.11	-0.15085993707180023	0.0566503070294857	-0.812267005443573	-0.33172672986984253	0.48112213611602783	-1.955011010169983	3.889460325241089	0.015279144048690796	-3.672771453857422	-3.2331581115722656	-3.1230506896972656	-4.384765625	-5.676313400268555	-6.575587749481201	-8.091381072998047	-3.2834692001342773
ENSG00000243710.7	-0.6152200698852539	1.1178637742996216	-0.18738743662834167	-0.8035888671875	-0.07451623678207397	-0.0014862045645713806	1.3565183877944946	-1.5011142492294312	-4.640812397003174	-3.4071240425109863	-3.4979400634765625	-5.196141719818115	-6.44734001159668	-7.716371059417725	-9.426115989685059	-3.9131619930267334
ENSG00000179178.10	-0.2225632518529892	1.3487006425857544	-3.203380584716797	-0.9137016534805298	-2.5034728050231934	-2.8743770122528076	2.41947078704834	0.21615633368492126	-2.5982918739318848	-3.085923671722412	-3.4257431030273438	-4.45808219909668	-5.764761924743652	-6.386240482330322	-7.480339527130127	-3.9206347465515137
ENSG00000066056.13	0.8704097270965576	0.37297001481056213	1.7221788167953491	1.0708409547805786	-1.016312837600708	-0.21874818205833435	1.8265793323516846	0.16517934203147888	-4.251064300537109	-3.6700448989868164	-3.776510238647461	-4.840849876403809	-6.113337516784668	-6.602729797363281	-8.89027214050293	-4.129297733306885
ENSG00000234694.1	-0.7391313314437866	0.3325498402118683	-1.338700294494629	-0.31150177121162415	-0.9139266610145569	-0.14366701245307922	0.6085636019706726	-0.13304927945137024	-3.970735788345337	-2.7428250312805176	-3.193686008453369	-4.779298782348633	-5.594130516052246	-6.454213619232178	-8.429010391235352	-3.479379415512085
ENSG00000117399.13	-0.23809631168842316	0.6285722255706787	-0.8938724994659424	-0.18963375687599182	-0.896047055721283	-0.7441523671150208	0.09816262125968933	0.08739784359931946	-3.298788070678711	-2.6857194900512695	-3.2969613075256348	-4.476221084594727	-4.825335502624512	-5.573959827423096	-7.5444722175598145	-3.589021682739258
ENSG00000066322.13	-0.7725404500961304	1.2022563219070435	-2.0257463455200195	-1.146435022354126	-3.7559444904327393	-2.6816341876983643	3.9324069023132324	0.6341515779495239	-3.11592698097229	-3.2945990562438965	-3.8925886154174805	-4.31508731842041	-5.890049934387207	-6.723647117614746	-7.8329691886901855	-4.204329013824463
ENSG00000159479.16	-0.2833735942840576	-0.1963272988796234	-0.5131650567054749	-0.22958716750144958	-0.6466143131256104	-0.7460091710090637	3.3543543815612793	-0.17835941910743713	-3.9941132068634033	-3.145336627960205	-3.2316794395446777	-4.277896881103516	-5.476595878601074	-6.423138618469238	-7.864930629730225	-3.5833230018615723
ENSG00000198198.14	-0.5177215933799744	0.24729838967323303	-1.3593738079071045	0.387291818857193	-1.730992078781128	0.43759503960609436	2.8265538215637207	0.1202753484249115	-4.034689426422119	-2.7265377044677734	-3.370487689971924	-4.381422996520996	-5.577703475952148	-6.47842264175415	-7.912166118621826	-3.6102707386016846
ENSG00000229372.1	-0.23551037907600403	-0.28912970423698425	-0.8357495069503784	-0.09642574191093445	-0.9002971053123474	0.028635628521442413	0.20977827906608582	-0.7083388566970825	-4.10902738571167	-2.509395122528076	-3.0945396423339844	-4.37520694732666	-5.402351379394531	-6.334122180938721	-8.604430198669434	-3.4489448070526123
ENSG00000178922.16	-0.05392216518521309	0.1059063971042633	-0.9704203009605408	0.06535625457763672	-1.4064955711364746	-0.9198780655860901	2.2247190475463867	-0.5210603475570679	-4.157317161560059	-3.156370162963867	-3.434933662414551	-4.792813301086426	-6.205233573913574	-6.63784122467041	-8.43072509765625	-3.9230799674987793
ENSG00000229348.1	-0.2448473423719406	0.06501564383506775	-0.21181654930114746	0.4308154284954071	-0.668246328830719	0.5593448281288147	0.8524406552314758	-0.011014968156814575	-4.149672508239746	-2.8572428226470947	-3.709988594055176	-4.875667572021484	-6.192597389221191	-6.58687162399292	-8.375988006591797	-4.169805526733398
ENSG00000142949.16	-0.5440578460693359	0.5288077592849731	0.1680123209953308	0.6801832914352417	-1.5472058057785034	-0.666657030582428	4.930456638336182	-0.48474350571632385	-3.9692418575286865	-3.476081371307373	-3.629739284515381	-4.593931198120117	-5.551130294799805	-6.417172908782959	-7.189265251159668	-3.6903533935546875
ENSG00000066135.12	-0.9516671895980835	0.598281979560852	-0.4015970826148987	0.12257006764411926	-0.47287726402282715	-0.4852848947048187	4.359121799468994	-0.12491598725318909	-4.04486083984375	-3.557370901107788	-3.402909278869629	-4.809540271759033	-5.878401756286621	-6.682251453399658	-7.94753360748291	-3.9085190296173096
ENSG00000236200.5	-0.5426211357116699	-0.15855258703231812	-0.28601357340812683	0.017790451645851135	0.14849098026752472	0.004502303898334503	0.19519594311714172	-0.5673242807388306	-3.5158910751342773	-2.6926679611206055	-2.8175487518310547	-4.2950029373168945	-5.404256820678711	-5.744099140167236	-7.998463153839111	-3.6594414710998535
ENSG00000126091.19	0.8795585632324219	-0.3283708989620209	-0.12528365850448608	0.01568669080734253	0.033514782786369324	0.041307009756565094	3.6630468368530273	-0.0912412703037262	-3.755312442779541	-3.189859390258789	-3.1507492065429688	-4.571769714355469	-5.588008880615234	-6.4219584465026855	-7.858403205871582	-3.5702383518218994
ENSG00000283414.1	-1.3357778787612915	-1.0947222709655762	1.1397043466567993	-0.1682632565498352	0.022826462984085083	0.8851966857910156	1.495368480682373	-1.3354920148849487	-4.035759449005127	-2.2848727703094482	-3.3510289192199707	-4.003361701965332	-4.871962547302246	-7.10386323928833	-10.354602813720703	-3.2629730701446533
ENSG00000233674.2	-0.8049286007881165	-0.32229170203208923	-1.211258053779602	0.04986186325550079	-0.4718879461288452	1.3543096780776978	1.6820355653762817	-0.5097352266311646	-3.2058351039886475	-1.9894392490386963	-2.212815284729004	-3.1851582527160645	-4.109714984893799	-5.608290672302246	-8.146190643310547	-3.678410530090332
ENSG00000283477.1	-0.06835208833217621	0.5076372623443604	-0.1045798733830452	-0.24717774987220764	-1.1147891283035278	1.9637295007705688	2.4412505626678467	-0.6153719425201416	-4.5325775146484375	-2.200671434402466	-3.195403575897217	-5.260561466217041	-7.26540470123291	-7.975192546844482	-8.786423683166504	-4.173218727111816
ENSG00000117407.16	-0.04488985612988472	-0.13561367988586426	-0.12701573967933655	0.1488085389137268	-0.17141462862491608	0.30493107438087463	0.19341805577278137	-0.15802578628063202	-3.5294113159179688	-2.581202507019043	-2.869495391845703	-3.9418694972991943	-5.028836250305176	-5.484426498413086	-7.402003288269043	-3.191436529159546
ENSG00000237950.1	-0.16408489644527435	0.21278026700019836	-1.4340389966964722	0.22876203060150146	-1.415121078491211	0.6437280774116516	1.787529468536377	-0.6579571962356567	-3.542541742324829	-2.3884854316711426	-2.8561415672302246	-3.7028424739837646	-5.0467119216918945	-5.5308837890625	-7.250093936920166	-3.3726069927215576
ENSG00000117408.10	-0.23456989228725433	0.5885320901870728	-1.910263180732727	0.23605594038963318	-2.0219500064849854	-1.633784532546997	5.454798221588135	0.14080533385276794	-3.543999671936035	-3.03256893157959	-3.3402304649353027	-4.177876949310303	-5.441173553466797	-5.976737022399902	-7.552460670471191	-3.3016855716705322
ENSG00000132768.13	0.2969924211502075	-0.13058003783226013	-0.6345532536506653	0.16376394033432007	-0.17751260101795197	-1.0197198390960693	3.2110705375671387	0.05309852957725525	-4.033783912658691	-3.4922327995300293	-3.331610679626465	-4.819821834564209	-5.802473068237305	-6.617740154266357	-8.633625984191895	-3.603424310684204
ENSG00000117410.13	-0.5868703126907349	-0.4860480725765228	-0.9581908583641052	0.323018878698349	-0.11007560789585114	-2.6751294136047363	4.542103290557861	-0.13343706727027893	-3.5379638671875	-3.514108180999756	-3.1354126930236816	-4.34538459777832	-5.444276809692383	-6.26267671585083	-7.571352958679199	-3.4855055809020996
ENSG00000117411.16	1.227803349494934	-0.3114705979824066	-0.5267530083656311	0.2624838054180145	-0.5143545269966125	-0.6366538405418396	4.119339466094971	-0.7034059762954712	-3.811180353164673	-3.1939244270324707	-3.2731986045837402	-4.230147838592529	-5.239283561706543	-6.114527702331543	-7.452245712280273	-3.220050573348999
ENSG00000159214.12	-0.002662796527147293	-0.5737966299057007	-0.0056206658482551575	0.08990107476711273	-0.9479677081108093	0.22070500254631042	1.4630475044250488	-0.8423197269439697	-4.127664566040039	-3.339715003967285	-3.643348217010498	-5.125672340393066	-6.361066818237305	-7.1737542152404785	-9.474100112915039	-4.10936164855957
ENSG00000196517.11	-1.1128954887390137	0.9347329139709473	-1.0977975130081177	-0.03936389088630676	-3.0507967472076416	-1.2170095443725586	2.0146210193634033	-0.4276498854160309	-2.9277970790863037	-2.5983893871307373	-3.555941104888916	-3.9506664276123047	-4.878491401672363	-5.927984714508057	-7.363446235656738	-3.845778226852417
ENSG00000230615.6	-0.10334591567516327	0.09518086910247803	-0.5017700791358948	-0.34163618087768555	-0.3274984359741211	-0.033040136098861694	0.202395498752594	-0.3555056154727936	-3.7017111778259277	-2.8308019638061523	-3.326775550842285	-4.312251091003418	-5.342514991760254	-6.038372039794922	-7.850069522857666	-3.7117831707000732
ENSG00000178028.13	-0.5512387752532959	0.02426328882575035	-0.9234623312950134	0.42346546053886414	-0.5660825371742249	-0.29031047224998474	3.139814853668213	-0.34048572182655334	-4.098988056182861	-3.297574758529663	-3.587906837463379	-4.718516826629639	-6.0792036056518555	-6.844748497009277	-8.66254711151123	-3.818800926208496
ENSG00000117419.14	0.9011126756668091	-0.5803707838058472	-0.06748492270708084	-0.04111418128013611	-0.6950184106826782	-1.0335265398025513	6.046672344207764	-0.3434981405735016	-3.6553280353546143	-3.1550710201263428	-3.134431838989258	-4.077528476715088	-5.4367876052856445	-5.862584114074707	-7.6828508377075195	-3.2191267013549805
ENSG00000233602.1	-1.4590791463851929	0.4955841600894928	-0.6389727592468262	0.7560113668441772	-1.871733546257019	1.1262112855911255	2.4243621826171875	-0.9619780778884888	-3.9766509532928467	-2.305569648742676	-2.8229331970214844	-4.070873737335205	-5.131564140319824	-5.602822303771973	-7.950433731079102	-2.957138776779175
ENSG00000187147.17	-0.7603247165679932	0.2266654074192047	-1.9303512573242188	0.13065692782402039	-1.8932245969772339	-1.1116597652435303	3.8930130004882812	-0.03060808777809143	-3.861361026763916	-2.824869155883789	-3.420126438140869	-4.433260440826416	-5.637134552001953	-6.398643493652344	-8.176011085510254	-3.402686357498169
ENSG00000263381.1	-2.62609601020813	0.6979924440383911	-4.426547050476074	-0.07445958256721497	-3.020644187927246	-0.13755634427070618	1.754224181175232	0.019936412572860718	-3.1705024242401123	-1.9538345336914062	-2.328474998474121	-4.758887767791748	-6.043703079223633	-6.761216640472412	-10.872905731201172	-3.0533077716827393
ENSG00000126106.13	-0.1949814409017563	0.22306469082832336	-0.03701145201921463	0.23583897948265076	-0.3230961561203003	-0.6743627190589905	1.3264365196228027	0.004552692174911499	-3.7876932621002197	-3.037949562072754	-3.263784885406494	-4.414230823516846	-5.497332572937012	-6.130913734436035	-7.585108280181885	-3.454244613647461
ENSG00000198520.10	0.13501079380512238	-0.21004125475883484	-0.40887051820755005	0.03163844347000122	-1.208890676498413	0.9982295632362366	1.7184154987335205	-0.7076396942138672	-4.461533069610596	-2.64229679107666	-3.0003504753112793	-4.417202949523926	-5.8838701248168945	-6.443212985992432	-8.996306419372559	-3.6104812622070312
ENSG00000199377.1	-0.23579977452754974	-0.08978274464607239	-0.8480818867683411	-0.5952428579330444	0.11707782745361328	-2.8926498889923096	-0.1339077353477478	-0.3685164749622345	-4.462457180023193	-3.0982959270477295	-2.566446304321289	-3.0255322456359863	-6.850429534912109	-6.698637008666992	-8.868819236755371	-3.2039787769317627
ENSG00000200169.1	1.898410677909851	-0.9976742267608643	-0.4980751872062683	-1.688886284828186	-2.0067811012268066	-2.5980758666992188	1.5093430280685425	-1.7533284425735474	-3.5211853981018066	-2.2453556060791016	-2.7595419883728027	-4.617952346801758	-5.163852691650391	-6.585306167602539	-7.742215156555176	-3.627159833908081
ENSG00000225721.5	-0.3459862470626831	-0.3047008216381073	-0.05335376411676407	0.3207385838031769	-0.29897016286849976	0.014974065124988556	0.27758312225341797	-0.1017332524061203	-3.8092241287231445	-2.4465174674987793	-3.3970766067504883	-4.409946441650391	-6.091583251953125	-6.780493259429932	-9.461499214172363	-4.579132556915283
ENSG00000142937.11	0.42046844959259033	-2.1887247562408447	-0.6938231587409973	-0.38546326756477356	-1.345077633857727	-2.1706740856170654	7.24087381362915	-0.10003796219825745	-3.7366905212402344	-3.1855270862579346	-3.4171581268310547	-4.186995506286621	-5.855755805969238	-6.687953472137451	-8.589058876037598	-3.2369654178619385
ENSG00000200913.1	-0.8384889960289001	0.31516411900520325	0.5584251880645752	-0.13520145416259766	-0.4273671507835388	-0.2635243833065033	1.4117308855056763	-0.5498942136764526	-4.226324558258057	-3.665149211883545	-3.4213685989379883	-3.595231533050537	-6.208950996398926	-6.673851013183594	-9.567227363586426	-4.164607524871826
ENSG00000142959.4	0.11467574536800385	-0.21073296666145325	-0.36994194984436035	-0.15446709096431732	0.5159186720848083	-0.22761574387550354	1.0050628185272217	-0.3961375057697296	-3.6306896209716797	-2.8988003730773926	-2.8332509994506836	-4.296712398529053	-5.361021041870117	-6.254392623901367	-8.354452133178711	-3.5484890937805176
ENSG00000173846.12	-0.42509716749191284	-0.922247052192688	0.8090733885765076	0.215419203042984	-1.2016445398330688	-0.48169249296188354	1.4948583841323853	-0.007172971963882446	-4.381299018859863	-2.9226083755493164	-3.390389919281006	-4.594022750854492	-6.383719444274902	-7.048488140106201	-9.129695892333984	-4.2242536544799805
ENSG00000222009.8	-0.2662799060344696	-0.7660551071166992	0.590690553188324	0.31311360001564026	-1.1076409816741943	0.33259034156799316	0.7126433253288269	-0.4928533732891083	-3.7179765701293945	-2.7135932445526123	-3.07564115524292	-4.365228176116943	-5.761667251586914	-6.286272048950195	-8.701105117797852	-3.5600168704986572
ENSG00000117425.13	-0.31966084241867065	0.13821831345558167	-0.7259580492973328	0.829249382019043	-0.252231240272522	0.9181438088417053	1.5524585247039795	-0.6725404262542725	-3.8847029209136963	-2.3185477256774902	-2.8033385276794434	-3.988950252532959	-5.291501045227051	-5.881324291229248	-8.543975830078125	-3.239177942276001
ENSG00000226499.1	-0.31619077920913696	-0.05386338010430336	-0.9351534843444824	0.16627082228660583	-0.6684752106666565	1.7051427364349365	1.4947614669799805	-0.5281940698623657	-3.46877121925354	-2.4365146160125732	-2.193241596221924	-3.5811989307403564	-5.203189849853516	-5.550967693328857	-8.917496681213379	-3.986814260482788
ENSG00000070785.16	-0.6595203876495361	-0.05294594541192055	-0.5726320147514343	-0.4253772497177124	-0.15760205686092377	-0.9679147601127625	3.0617027282714844	0.09828338027000427	-3.9916012287139893	-3.414461612701416	-3.4048008918762207	-4.500722885131836	-5.653620719909668	-6.703316688537598	-8.24940299987793	-3.73002028465271
ENSG00000126107.14	-0.7559300065040588	0.5610514879226685	-0.6500213742256165	0.6025794744491577	-1.1656078100204468	-0.6222231984138489	2.455282211303711	-0.24534264206886292	-3.7137610912323	-2.9808003902435303	-3.315978527069092	-4.264540195465088	-5.311615943908691	-6.075413227081299	-7.486085414886475	-3.586893081665039
ENSG00000126088.13	0.41820859909057617	-0.1926191747188568	-0.44587427377700806	0.03678444027900696	-0.024307265877723694	-1.934706687927246	4.724025249481201	0.15121802687644958	-3.5911848545074463	-3.4227395057678223	-3.2294769287109375	-4.417553901672363	-5.470450401306152	-6.438243389129639	-7.584421634674072	-3.4874167442321777
ENSG00000162415.6	-0.17553459107875824	-0.02025875821709633	-0.37807321548461914	0.06440609693527222	-0.13163815438747406	0.016657032072544098	2.8548572063446045	-0.38722577691078186	-3.9629857540130615	-3.0644311904907227	-3.0003042221069336	-4.547303676605225	-5.551419258117676	-6.228212356567383	-7.632245063781738	-3.4203550815582275
ENSG00000234315.1	-0.6907700300216675	0.08414396643638611	-0.4872925877571106	0.3112778663635254	-0.2211941033601761	1.130871295928955	0.6723269820213318	-0.6773426532745361	-3.170511484146118	-2.14921498298645	-2.247159481048584	-3.52409029006958	-4.886011123657227	-4.501438617706299	-6.8229265213012695	-3.0632474422454834
ENSG00000281912.1	-0.09131185710430145	0.15034976601600647	-0.4701095223426819	0.010249733924865723	-0.4417818784713745	-0.37764763832092285	0.3110652267932892	-0.16026845574378967	-3.4359569549560547	-2.904461622238159	-3.131546974182129	-4.3115234375	-5.328513145446777	-5.8336405754089355	-7.9335126876831055	-3.5053038597106934
ENSG00000186603.5	1.2401801347732544	1.188601016998291	-0.1173974946141243	-0.250492662191391	-0.20729409158229828	-0.24644705653190613	0.7612026333808899	-0.526038646697998	-3.603695869445801	-2.6060566902160645	-3.3469042778015137	-4.142587661743164	-5.442439079284668	-6.166263103485107	-7.6333088874816895	-3.4363138675689697
ENSG00000132781.17	-0.3067436218261719	-0.294554203748703	-1.1265314817428589	0.2595427632331848	-1.609576940536499	-0.10741367191076279	2.035081148147583	-0.45548370480537415	-3.949080228805542	-2.867064952850342	-3.3492698669433594	-4.562851428985596	-5.595115661621094	-6.467361927032471	-8.196026802062988	-3.328702211380005
ENSG00000132773.11	-0.2302907556295395	-0.04162559285759926	-0.4346524477005005	0.20581290125846863	-0.3095433712005615	-0.7545223236083984	1.88084077835083	0.18343672156333923	-4.2695136070251465	-3.2594504356384277	-3.4154844284057617	-4.938431262969971	-6.026274681091309	-7.055183410644531	-8.830820083618164	-3.6945302486419678
ENSG00000070759.16	0.20551587641239166	0.1547565758228302	-1.3726245164871216	-0.6314276456832886	-2.4142444133758545	-0.6657366752624512	1.9668296575546265	0.02880820631980896	-3.4155712127685547	-2.439378023147583	-3.4310407638549805	-3.8178553581237793	-5.259334564208984	-5.928062438964844	-7.467099666595459	-3.5627593994140625
ENSG00000280670.2	0.061418186873197556	0.02658858522772789	-0.24786671996116638	-1.546370506286621	-1.607898473739624	-0.3576602637767792	1.2095398902893066	-1.1945877075195312	-2.9001052379608154	-2.376443862915039	-3.549248218536377	-4.102064609527588	-5.022787094116211	-4.615677833557129	-6.993829727172852	-3.685129165649414
ENSG00000132763.14	-0.23744319379329681	0.37751665711402893	-0.8636075258255005	0.0317821204662323	-0.6894068121910095	-1.1259715557098389	2.045586109161377	-0.423857718706131	-3.713346004486084	-3.0818567276000977	-3.1910128593444824	-4.465116500854492	-5.408041000366211	-6.108296871185303	-7.976242542266846	-3.6490719318389893
ENSG00000117450.13	-0.5068992376327515	-0.44438251852989197	0.7535180449485779	-0.8127310276031494	-2.349644422531128	-2.367509365081787	7.464019298553467	-0.43414297699928284	-3.5068724155426025	-3.623157501220703	-3.8642196655273438	-4.190329074859619	-5.760049819946289	-6.548244476318359	-8.061312675476074	-3.7792980670928955
ENSG00000117448.13	-0.051261890679597855	0.02552046999335289	-0.9072045683860779	-0.29711249470710754	-0.36826127767562866	-1.9336644411087036	3.6827268600463867	0.06476745009422302	-3.6743199825286865	-3.3325133323669434	-3.3683485984802246	-4.4980034828186035	-5.843667984008789	-6.495687484741211	-8.222737312316895	-3.734492063522339
ENSG00000281133.1	-0.027673859149217606	0.3601592481136322	-1.0083773136138916	-0.04483450949192047	-0.4626201391220093	0.04798576980829239	0.6485851407051086	-0.2275659143924713	-2.5333123207092285	-1.6476519107818604	-1.8194040060043335	-2.9111223220825195	-4.2171783447265625	-4.506347179412842	-6.311587333679199	-2.752748966217041
ENSG00000280836.1	-0.08155642449855804	1.3234779834747314	-0.6465053558349609	-0.637321949005127	0.21666420996189117	-0.42347583174705505	0.8727188110351562	-0.1890057623386383	-3.9456639289855957	-2.03863525390625	-2.618732452392578	-3.5246505737304688	-4.363820552825928	-6.100698471069336	-7.417669296264648	-3.2379462718963623
ENSG00000132780.16	-1.0070549249649048	-0.021379563957452774	-1.3556996583938599	-0.5744590759277344	-2.9632232189178467	0.13368287682533264	3.3212673664093018	-0.42082586884498596	-3.5685572624206543	-2.441545248031616	-3.2982940673828125	-3.9873905181884766	-5.410771369934082	-6.280550956726074	-7.988560199737549	-3.6124696731567383
ENSG00000159588.14	-0.42495298385620117	0.03043961152434349	-0.43354615569114685	0.05173361301422119	-1.1595786809921265	0.4221538007259369	0.5627611875534058	-0.7106736898422241	-3.9901163578033447	-2.729635715484619	-3.401304244995117	-4.033136367797852	-5.4521636962890625	-6.454370021820068	-8.319244384765625	-3.4959464073181152
ENSG00000159592.10	-0.3059234619140625	-0.04757866635918617	-0.09957785159349442	-0.3359685242176056	-0.942902147769928	-0.9520247578620911	4.399746417999268	-0.37588825821876526	-3.602987289428711	-3.2159337997436523	-3.4736380577087402	-4.291868686676025	-5.392683029174805	-6.170069694519043	-7.435292720794678	-3.6521687507629395
ENSG00000225447.1	-1.1295193433761597	-0.20142361521720886	-0.3631358742713928	-0.21562734246253967	-1.373449444770813	1.2629178762435913	2.2642626762390137	-0.9253064393997192	-3.2584400177001953	-1.5320937633514404	-2.3647546768188477	-3.321692705154419	-4.410154342651367	-5.655637264251709	-6.744420528411865	-2.88694429397583
ENSG00000234329.1	-1.096462607383728	0.3022841513156891	-0.5792787075042725	-0.1878807246685028	-1.4925305843353271	1.3167760372161865	2.2234044075012207	-0.8744741678237915	-4.005866527557373	-2.1725432872772217	-3.153944492340088	-4.208659648895264	-5.929056167602539	-6.791291236877441	-8.588719367980957	-3.336648464202881
ENSG00000159596.6	-0.21507810056209564	0.1294342577457428	-0.0074413493275642395	-0.771714448928833	-0.3143976330757141	-0.6975505948066711	2.7741482257843018	-0.6599267721176147	-3.9994924068450928	-3.2350378036499023	-3.4306845664978027	-4.825649738311768	-5.744111061096191	-6.7447309494018555	-8.213136672973633	-3.756704568862915
ENSG00000197429.10	0.07389725744724274	-0.03385481610894203	0.026303939521312714	-1.0293790102005005	-0.9986292719841003	-0.3050179183483124	3.04911732673645	-0.13520923256874084	-3.46049427986145	-3.0461063385009766	-3.204153060913086	-4.131426811218262	-5.389159202575684	-5.889519691467285	-7.330519676208496	-3.539308786392212
ENSG00000230896.1	0.33888834714889526	0.1901966631412506	0.04943554848432541	-0.9189409017562866	-0.7123616337776184	-0.08808817714452744	2.308238983154297	-0.24629607796669006	-3.876974105834961	-3.1415505409240723	-3.5768814086914062	-4.4239654541015625	-5.585081100463867	-6.369936943054199	-7.770646095275879	-3.7286832332611084
ENSG00000086015.20	-0.11949048936367035	-0.31040582060813904	0.12232082337141037	0.37531790137290955	-0.8911846280097961	0.1002974882721901	2.9980435371398926	-0.5256279706954956	-4.2643609046936035	-3.1129748821258545	-3.664158821105957	-4.689818859100342	-5.85774040222168	-6.726737022399902	-8.369206428527832	-3.6348140239715576
ENSG00000117461.14	0.28800976276397705	-0.5194908380508423	1.7761008739471436	0.0008157193660736084	0.46201765537261963	0.11026398092508316	3.2214746475219727	0.9044793844223022	-3.522780179977417	-3.456745147705078	-3.1199445724487305	-4.40054178237915	-5.300829887390137	-5.762853622436523	-7.316078186035156	-3.2805802822113037
ENSG00000085998.13	0.17305053770542145	0.2721339762210846	-1.061441421508789	0.0002104341983795166	-1.226509690284729	-1.148199439048767	4.14602518081665	-0.208672434091568	-3.6861517429351807	-3.1120522022247314	-3.2108988761901855	-4.227481365203857	-5.393280982971191	-6.010437965393066	-7.537693500518799	-3.5358293056488037
ENSG00000171357.5	-0.4393186569213867	-0.463275283575058	-1.387337565422058	0.3507581055164337	-0.7694158554077148	0.2454393208026886	4.487004280090332	0.008668750524520874	-3.4967262744903564	-3.0269289016723633	-3.2715964317321777	-4.269880294799805	-5.669581413269043	-6.095772743225098	-7.739787578582764	-3.6445977687835693
ENSG00000085999.11	-1.0713603496551514	-0.707984983921051	-0.8345841765403748	0.44299736618995667	-0.0620771199464798	0.9637771248817444	1.1655685901641846	-0.6283884048461914	-3.75957989692688	-2.217313766479492	-2.678295612335205	-3.822810649871826	-5.4119110107421875	-5.863534927368164	-8.42750072479248	-3.288236141204834
ENSG00000132128.16	-0.339491605758667	0.05461325868964195	-0.1440989375114441	0.28655877709388733	-0.8237264752388	-0.5083141922950745	3.3164610862731934	0.15428385138511658	-3.8738207817077637	-3.312498092651367	-3.462707996368408	-4.559561729431152	-5.66438102722168	-6.459890365600586	-7.76128625869751	-3.688368082046509
ENSG00000173660.11	0.5867017507553101	-1.4950278997421265	-1.3210991621017456	-0.32637664675712585	0.5957794785499573	-3.246056079864502	6.715721607208252	-0.6798347234725952	-3.521034002304077	-3.4286744594573975	-3.1978492736816406	-4.3497443199157715	-5.765753746032715	-6.62028169631958	-8.757515907287598	-3.2049801349639893
ENSG00000117481.10	-0.6635676622390747	-0.002408597618341446	-0.19435328245162964	0.0731341540813446	-0.507032573223114	-0.26110461354255676	1.902618408203125	-0.06371322274208069	-3.8690884113311768	-2.9294495582580566	-3.1431055068969727	-4.345884323120117	-5.460780143737793	-6.171591758728027	-7.644321918487549	-3.5245797634124756
ENSG00000225779.1	-1.0536977052688599	-0.5479288697242737	-0.283546507358551	0.06239183247089386	-0.8305298089981079	0.4692247211933136	0.5343659520149231	-0.5316740274429321	-3.551959753036499	-1.881759524345398	-2.6505331993103027	-3.635511636734009	-5.254547119140625	-5.488579750061035	-7.159635066986084	-3.0367591381073
ENSG00000117480.15	-1.1642444133758545	0.4515506327152252	-2.2396140098571777	-0.03275015950202942	-1.9247246980667114	-0.7807491421699524	4.5551862716674805	0.35438475012779236	-3.942793607711792	-3.1279449462890625	-3.5643129348754883	-4.4430832862854	-6.202664375305176	-6.473532199859619	-8.755642890930176	-3.7886695861816406
ENSG00000232022.7	-1.6807724237442017	-0.977450966835022	-0.23810985684394836	0.9605718851089478	-0.5767421722412109	1.351481556892395	1.193769097328186	0.06146368384361267	-3.61371111869812	-2.138559103012085	-3.0771703720092773	-4.092979431152344	-5.485431671142578	-5.522563934326172	-8.940394401550293	-3.014188528060913
ENSG00000162456.9	-0.00930868461728096	-0.25467243790626526	-0.008051760494709015	-0.26051074266433716	0.6225539445877075	0.32299625873565674	0.9347459077835083	0.04381111264228821	-4.129835605621338	-3.2866101264953613	-3.315354824066162	-4.747750282287598	-6.169366836547852	-6.600050449371338	-9.234114646911621	-3.7621428966522217
ENSG00000079277.19	-0.4185246229171753	-1.1859296560287476	-0.36312198638916016	0.01398739218711853	-0.8698914051055908	0.48899784684181213	2.267493963241577	-0.03015759587287903	-4.070032596588135	-3.034221649169922	-3.2695322036743164	-4.664786338806152	-5.996332168579102	-6.4769792556762695	-8.806808471679688	-3.712507963180542
ENSG00000142961.14	-0.6220409870147705	-1.1995102167129517	1.3661693334579468	0.213262140750885	-0.9346490502357483	0.28186216950416565	2.186018466949463	0.019429892301559448	-3.480443239212036	-3.179889440536499	-3.5320472717285156	-4.486286163330078	-5.563101768493652	-6.042043685913086	-7.8993706703186035	-3.7825632095336914
ENSG00000123472.12	0.11909307539463043	-0.5918692350387573	0.707779586315155	-0.2802028954029083	0.1284322589635849	-0.9040630459785461	5.548780918121338	-0.30062857270240784	-3.3970947265625	-3.2087206840515137	-3.413534641265869	-4.020651817321777	-5.170108795166016	-5.672048568725586	-6.968373775482178	-3.3031692504882812
ENSG00000233647.2	-0.2525186240673065	-0.06578126549720764	-0.1683548390865326	-0.03966927528381348	-0.4697079658508301	1.2940661907196045	1.1709907054901123	0.7350852489471436	-3.2872116565704346	-2.468841791152954	-2.8730850219726562	-4.060275077819824	-5.144528388977051	-5.637568950653076	-7.634645938873291	-3.588097095489502
ENSG00000159658.10	-0.10690842568874359	-0.008508536964654922	0.8505381941795349	-0.5840457677841187	-2.0315067768096924	-1.0766510963439941	5.714000225067139	-0.49453917145729065	-3.351105213165283	-3.081692934036255	-3.747084140777588	-4.091563701629639	-5.302817344665527	-5.783998489379883	-6.841212272644043	-3.5321426391601562
ENSG00000261196.1	0.4234802722930908	-0.20808276534080505	-0.26100337505340576	-0.2374214231967926	-0.011593356728553772	1.0671569108963013	0.09482624381780624	-0.11294389516115189	-4.037744045257568	-2.4691858291625977	-2.5968332290649414	-4.032555103302002	-5.297937393188477	-6.29342794418335	-7.687587261199951	-3.368149757385254
ENSG00000261290.1	-0.15011276304721832	-0.1943025290966034	-1.231988549232483	-0.5000650882720947	0.2507938742637634	0.8081867098808289	0.4167502820491791	-0.031111091375350952	-4.783291339874268	-2.5691568851470947	-2.892300605773926	-4.380655288696289	-6.100869178771973	-6.321460247039795	-8.984089851379395	-3.6092689037323
ENSG00000186377.7	-0.8802269697189331	0.1965269148349762	-0.7339895367622375	-0.3130658268928528	1.6842089891433716	-0.2959727942943573	3.1286699771881104	-0.4320499002933502	-3.8235089778900146	-3.0960235595703125	-2.7845849990844727	-4.239108085632324	-5.435154914855957	-6.4780592918396	-8.159463882446289	-3.5992681980133057
ENSG00000186160.4	0.19541646540164948	-0.9070696830749512	-0.15959712862968445	-0.2147500067949295	0.40900570154190063	0.4239090383052826	1.5585963726043701	-0.5994665622711182	-3.7465555667877197	-2.907510757446289	-2.966827392578125	-4.016971588134766	-5.116711616516113	-5.892427921295166	-7.772363185882568	-3.1305112838745117
ENSG00000225506.2	-0.011056531220674515	-0.26758334040641785	-0.9681193232536316	-0.22585296630859375	0.45006173849105835	0.4952773153781891	0.7678347229957581	0.3782869875431061	-3.8569812774658203	-2.800152540206909	-3.231259822845459	-4.691713809967041	-5.507246017456055	-6.232336044311523	-8.301372528076172	-3.784169912338257
ENSG00000224805.2	0.6650724411010742	-0.2218768298625946	0.10617757588624954	-0.22350382804870605	0.21032831072807312	0.07369668036699295	0.6579719185829163	-0.18578919768333435	-3.234832525253296	-2.3959670066833496	-3.146646022796631	-4.024113178253174	-4.645478248596191	-5.455844402313232	-7.667033672332764	-3.235698938369751
ENSG00000162367.11	-0.6595072150230408	-0.3934262692928314	0.055293969810009	-0.1007598340511322	-0.5508604645729065	-0.927644670009613	0.7818865776062012	-1.2186146974563599	-3.5747838020324707	-2.7099480628967285	-3.1618881225585938	-4.44210958480835	-5.248711585998535	-5.756109237670898	-7.721538543701172	-3.907548666000366
ENSG00000123473.15	0.0736979991197586	-0.2927689254283905	-0.16659045219421387	-0.3442155420780182	0.08813643455505371	0.008246220648288727	1.2466331720352173	-0.020534664392471313	-3.8163394927978516	-3.0969228744506836	-3.1788830757141113	-4.5023579597473145	-5.353263854980469	-6.310177326202393	-8.073732376098633	-3.4032013416290283
ENSG00000162368.13	0.786367654800415	-0.3108442723751068	0.012500457465648651	-1.661253809928894	-0.9508780837059021	-0.9208374619483948	5.727056980133057	-0.47905436158180237	-3.833681344985962	-3.471719264984131	-3.4588794708251953	-4.369501113891602	-5.910371780395508	-6.471580982208252	-8.191073417663574	-3.6768112182617188
ENSG00000272491.1	0.5239913463592529	-0.05914450064301491	-0.9509672522544861	-0.04811166226863861	-0.7488230466842651	0.51462322473526	0.429799348115921	0.013424307107925415	-3.499634027481079	-2.5173840522766113	-2.859158992767334	-3.561593770980835	-5.189487457275391	-5.535430908203125	-7.678757667541504	-3.323702573776245
ENSG00000279214.1	-0.08505025506019592	0.2389131486415863	-0.3411948084831238	-0.35042479634284973	-0.24693773686885834	0.20858389139175415	0.16145843267440796	-0.27819889783859253	-3.6557633876800537	-2.6259548664093018	-3.1781177520751953	-3.9170114994049072	-5.1500749588012695	-5.557559013366699	-7.431341171264648	-3.49161958694458
ENSG00000132122.11	0.04924739524722099	-0.4295078217983246	-0.6321200728416443	-1.0594192743301392	-2.0175535678863525	0.09829167276620865	2.93900203704834	-0.4542171061038971	-3.5835723876953125	-2.5454397201538086	-3.0006418228149414	-3.780323028564453	-5.340808868408203	-5.8185296058654785	-7.368622779846191	-3.2976746559143066
ENSG00000224986.2	-0.4494079053401947	-0.22915884852409363	-1.1995524168014526	-0.17648392915725708	-1.9096137285232544	1.0943137407302856	1.5179696083068848	-0.2892080843448639	-3.9406096935272217	-1.879262089729309	-3.231677532196045	-3.8386480808258057	-5.305023193359375	-6.012564659118652	-7.841907024383545	-3.534226894378662
ENSG00000235105.1	-0.19852767884731293	0.2989513576030731	-0.18909668922424316	-0.3594101667404175	-0.3873409628868103	-0.4876370429992676	0.9075614213943481	-0.32930508255958557	-4.127334117889404	-3.0402019023895264	-3.6377220153808594	-4.284103870391846	-5.443490028381348	-5.995859622955322	-7.443693161010742	-3.466742992401123
ENSG00000232514.1	-0.40948814153671265	-0.13297554850578308	-0.8582240343093872	-0.08361934125423431	0.24771644175052643	1.0012810230255127	0.5017987489700317	-0.08345401287078857	-3.529797315597534	-2.7089107036590576	-2.7354321479797363	-3.7432117462158203	-5.102689743041992	-5.215383052825928	-7.596612453460693	-3.847506284713745
ENSG00000186094.16	-0.30924803018569946	0.060813095420598984	-0.27324768900871277	-0.33698442578315735	0.3713686466217041	0.4811987578868866	1.903382658958435	-0.5076069831848145	-3.6273605823516846	-2.8243327140808105	-2.937995433807373	-4.293093681335449	-5.454313278198242	-6.052818775177002	-7.87205696105957	-3.464601755142212
ENSG00000162373.12	-0.03014146164059639	-0.3504248559474945	-0.7946146726608276	-0.028975993394851685	-0.16457216441631317	-0.07751371711492538	2.1155788898468018	-0.031043797731399536	-3.4591872692108154	-2.8168230056762695	-3.0087180137634277	-4.14750337600708	-5.236283302307129	-5.907244682312012	-7.527526378631592	-3.367323637008667
ENSG00000225623.1	-0.8058983087539673	0.2683230936527252	0.3146783709526062	-0.7627580165863037	-0.17834670841693878	2.385073661804199	1.855019450187683	-0.8352344036102295	-1.9099552631378174	-1.9792516231536865	-2.0681192874908447	-2.9104466438293457	-4.602597236633301	-4.380402088165283	-7.622349739074707	-2.8068833351135254
ENSG00000237478.2	-0.13279514014720917	0.2039390504360199	-0.7706981897354126	0.28406962752342224	-0.590627908706665	2.0889713764190674	1.8400349617004395	-0.7393530607223511	-2.1454386711120605	-1.488539457321167	-1.454317569732666	-3.1481008529663086	-4.085234642028809	-4.343297958374023	-6.712201118469238	-2.386018991470337
ENSG00000162374.16	-0.6197131872177124	0.0806492269039154	-0.46512889862060547	-0.3469710350036621	0.15409943461418152	-0.2213243842124939	0.728216290473938	-0.36424657702445984	-3.6828062534332275	-2.8802919387817383	-3.133040428161621	-4.174510478973389	-4.993098258972168	-5.825872898101807	-7.474179267883301	-3.5801773071289062
ENSG00000185104.19	-0.04919706657528877	-0.5037442445755005	-0.5120696425437927	-0.5696876049041748	-0.9629330039024353	-0.3411496579647064	3.780470371246338	0.11893591284751892	-3.7219808101654053	-2.9410178661346436	-3.115811347961426	-4.129967212677002	-5.341716766357422	-5.906949996948242	-7.601443290710449	-3.357933282852173
ENSG00000123080.10	-0.4181126654148102	-0.46430811285972595	0.24815833568572998	-0.059541452676057816	-1.2918719053268433	-0.6796429753303528	1.0714040994644165	-0.29319193959236145	-3.3697097301483154	-3.1546781063079834	-3.4828743934631348	-4.201982498168945	-5.186051368713379	-5.498043060302734	-7.5369343757629395	-3.7170302867889404
ENSG00000203356.2	-0.17504067718982697	0.061165209859609604	-0.36025470495224	-0.15163114666938782	0.13734832406044006	0.02067958563566208	0.17387765645980835	-0.23526562750339508	-3.5444958209991455	-2.6334774494171143	-2.9135193824768066	-3.9630446434020996	-4.932751655578613	-5.595403671264648	-7.504538059234619	-3.2893412113189697
ENSG00000123091.4	0.6072338819503784	-0.7851542234420776	0.35693567991256714	-1.284095287322998	-0.3795453906059265	-1.104735016822815	7.485336780548096	-0.5729116201400757	-3.583706855773926	-3.3941731452941895	-3.248997211456299	-4.099830150604248	-5.606048583984375	-6.23124361038208	-7.641992568969727	-3.5015857219696045
ENSG00000085831.15	-0.5604050755500793	-0.3728909194469452	-0.1811266839504242	0.19307896494865417	0.7634465098381042	0.28347083926200867	1.384331464767456	0.29794755578041077	-3.5136759281158447	-2.785245656967163	-2.897246837615967	-4.040978908538818	-5.009980201721191	-5.499471664428711	-7.237870693206787	-3.3773865699768066
ENSG00000261664.5	-0.06000291183590889	-0.4005962908267975	-0.32405853271484375	-0.00693049281835556	0.36489179730415344	0.15962064266204834	0.3083004057407379	-0.08688697218894958	-3.252657890319824	-2.666423797607422	-2.5771617889404297	-3.6932637691497803	-4.827402114868164	-5.177143096923828	-7.327747821807861	-3.3264999389648438
ENSG00000085832.16	0.16422511637210846	0.06806626915931702	-0.2792733311653137	-1.0198936462402344	-1.4900668859481812	-1.1669774055480957	5.823619365692139	-0.3957737982273102	-3.4709157943725586	-3.1591429710388184	-3.33646297454834	-4.02277946472168	-5.346713066101074	-5.866900444030762	-7.39475154876709	-3.43147349357605
ENSG00000227070.1	-0.03578333929181099	-0.466558575630188	-0.18260958790779114	-0.425412118434906	-0.621505618095398	0.1762363314628601	0.24260443449020386	0.1148851066827774	-3.716214895248413	-2.732283115386963	-3.7133750915527344	-4.401521682739258	-5.745706558227539	-6.177566051483154	-8.383728981018066	-4.015613079071045
ENSG00000227742.1	0.07422883808612823	0.11107370257377625	-0.6962496638298035	-0.4446670711040497	-0.3118986487388611	0.2890769839286804	0.24755415320396423	-0.45277708768844604	-3.5260562896728516	-2.648151159286499	-3.0327301025390625	-4.017105579376221	-5.354212760925293	-5.7696027755737305	-8.190808296203613	-3.823164939880371
ENSG00000117859.18	-0.5298342704772949	-0.15432795882225037	-0.6394422650337219	-0.7169078588485718	-1.246512770652771	-0.32553526759147644	3.3998332023620605	0.38442572951316833	-3.8366997241973877	-3.111421585083008	-3.3688931465148926	-4.3666157722473145	-5.683643341064453	-6.450786113739014	-8.031516075134277	-3.6341943740844727
ENSG00000232846.1	-0.3826584219932556	-0.008657071739435196	-0.3869858384132385	-0.008347302675247192	-0.7938979268074036	0.5562887787818909	0.3098572790622711	0.0521317720413208	-3.881530284881592	-2.710928201675415	-3.204845428466797	-4.026578903198242	-5.226657867431641	-5.6011176109313965	-8.083808898925781	-3.4891128540039062
ENSG00000078618.20	-0.6301596164703369	0.18058553338050842	-0.05912894755601883	-0.43124309182167053	-0.7510444521903992	-0.6955961585044861	5.053513050079346	0.1195889413356781	-3.908442974090576	-3.3663690090179443	-3.43864107131958	-4.451770305633545	-5.561226844787598	-6.351814270019531	-7.609050750732422	-3.59952712059021
ENSG00000266993.3	-0.1399543583393097	-0.0027834512293338776	-0.18342718482017517	-0.11146391928195953	-0.21349261701107025	0.15794029831886292	0.15557417273521423	-0.15969078242778778	-3.5891408920288086	-2.482800006866455	-2.8377861976623535	-4.02199649810791	-4.687243461608887	-5.499870300292969	-7.659543514251709	-3.188537836074829
ENSG00000169213.6	-1.0346026420593262	1.320425271987915	0.0336790606379509	-0.08300581574440002	2.0591259002685547	-0.7103899717330933	2.2129571437835693	0.3487134873867035	-5.127347946166992	-4.0535054206848145	-3.231135845184326	-5.054076671600342	-5.3588104248046875	-7.8753204345703125	-8.618212699890137	-4.250225067138672
ENSG00000117862.11	-0.37449681758880615	-0.01964578405022621	0.42843836545944214	-0.0987372100353241	-0.2992459535598755	-1.2663626670837402	3.1514651775360107	-0.1296345293521881	-3.6648879051208496	-3.2418439388275146	-3.3671388626098633	-4.234079360961914	-5.437255859375	-6.53120231628418	-7.671874046325684	-3.7038042545318604
ENSG00000198841.3	-0.4175182580947876	0.09047821164131165	0.09485345333814621	-0.053179383277893066	0.3431655764579773	-1.1275622844696045	1.7627971172332764	-0.08371725678443909	-4.2017822265625	-3.5128746032714844	-3.605348587036133	-4.876098155975342	-6.125365257263184	-7.104833602905273	-9.147315979003906	-4.142087459564209
ENSG00000134717.17	-0.3276350498199463	-0.5234776735305786	-0.43705981969833374	-1.0616755485534668	-0.1279347687959671	-1.187412977218628	3.8188834190368652	0.2505267560482025	-3.6804113388061523	-3.1115288734436035	-3.028287410736084	-4.024460315704346	-5.504917144775391	-5.983630657196045	-7.413893222808838	-3.343691825866699
ENSG00000157077.14	-0.6256188154220581	0.06909480690956116	0.25059086084365845	-0.3870581090450287	0.29942381381988525	-1.062511682510376	5.377302646636963	-0.5289491415023804	-3.846750020980835	-3.3282244205474854	-3.3382954597473145	-4.546150207519531	-5.47513484954834	-6.422890663146973	-7.781587600708008	-3.4541070461273193
ENSG00000241745.3	-0.5036539435386658	-0.770566999912262	-0.7714271545410156	0.34504005312919617	-0.24929530918598175	0.7886446118354797	0.819281280040741	-1.1335062980651855	-3.204838991165161	-1.6349692344665527	-2.3803913593292236	-2.8443782329559326	-3.5593788623809814	-4.690021991729736	-6.251089096069336	-2.9725217819213867
ENSG00000224255.2	-0.5029176473617554	0.12172666192054749	-0.17138373851776123	0.35927218198776245	-0.4557240605354309	1.274783968925476	0.8479785323143005	-0.9260085821151733	-3.398435115814209	-1.7666144371032715	-2.439955234527588	-2.914776563644409	-4.078047275543213	-4.689699172973633	-7.121265411376953	-2.7094051837921143
ENSG00000213735.2	-0.8556336760520935	0.20036819577217102	-0.3605000376701355	0.44920018315315247	-0.0838485062122345	0.8573190569877625	0.7737690806388855	-0.4127222001552582	-2.6205523014068604	-1.410034418106079	-1.8850795030593872	-3.1236209869384766	-3.952594757080078	-4.342765808105469	-6.309220790863037	-2.8139255046844482
ENSG00000154222.14	0.0013989917933940887	0.12596097588539124	-1.039306402206421	0.0416623055934906	-1.7384892702102661	-0.48203417658805847	2.371586799621582	0.38183602690696716	-3.370439052581787	-2.7615158557891846	-3.0629844665527344	-3.9779820442199707	-5.218502998352051	-5.722373008728027	-7.270507335662842	-3.505795955657959
ENSG00000272100.1	-0.9403005242347717	-0.4352726638317108	0.32155513763427734	0.8725664615631104	0.12389467656612396	0.6227373480796814	0.9930197596549988	-0.5823996067047119	-4.051896095275879	-2.789612054824829	-2.804952621459961	-4.462506294250488	-5.677735328674316	-5.964400768280029	-9.20765209197998	-3.510939121246338
ENSG00000224680.4	-0.501946747303009	-0.07316562533378601	0.20613247156143188	-0.25099673867225647	0.30805444717407227	-0.10461395233869553	0.643977701663971	-0.1959904134273529	-3.7637460231781006	-2.979243516921997	-3.0439720153808594	-4.392880439758301	-5.153445243835449	-5.936983108520508	-7.518702507019043	-3.641946792602539
ENSG00000134748.12	-0.3015897274017334	-0.06752309203147888	0.8318731188774109	-0.7382532358169556	-1.5154879093170166	-0.23517093062400818	3.557680606842041	-0.7748464345932007	-3.5320117473602295	-3.07220458984375	-3.5836129188537598	-4.378005504608154	-5.516425132751465	-6.3036017417907715	-7.778953552246094	-3.815213918685913
ENSG00000134744.13	-0.4229285717010498	-0.21705064177513123	-0.21836918592453003	-0.5386871099472046	-1.4976812601089478	0.7946110367774963	3.074213743209839	-0.06741157174110413	-3.8305017948150635	-2.911479949951172	-3.5365705490112305	-4.4187164306640625	-5.577223777770996	-6.398977756500244	-8.385924339294434	-3.817624807357788
ENSG00000272371.1	-0.010338012129068375	0.03017517551779747	-0.24755525588989258	-0.3014642000198364	-0.16573013365268707	0.1601671576499939	0.29596981406211853	-0.36662426590919495	-4.447162628173828	-2.9509117603302	-3.6932411193847656	-4.966490745544434	-5.645227432250977	-6.577142238616943	-8.602113723754883	-4.067541122436523
ENSG00000116157.5	-0.17261938750743866	-0.14734229445457458	-0.06478691846132278	-0.038182079792022705	-0.49599689245224	-0.27032220363616943	1.5345144271850586	-0.33753278851509094	-4.110896110534668	-3.0429205894470215	-3.4708404541015625	-4.354493618011475	-5.793805122375488	-6.829357147216797	-8.438438415527344	-3.6707539558410645
ENSG00000162377.5	-0.4481792449951172	0.45398393273353577	-0.10099310427904129	-0.25390446186065674	0.2559783458709717	-1.2278571128845215	2.982922077178955	-0.06592407822608948	-3.667701244354248	-3.2148778438568115	-3.322533130645752	-4.517550468444824	-5.36036491394043	-6.688234806060791	-7.872576713562012	-3.4793975353240967
ENSG00000162378.12	-0.6000220775604248	0.1349884569644928	0.42854422330856323	-0.8112163543701172	0.18457095324993134	-1.33689546585083	4.90900182723999	0.018457502126693726	-3.6375396251678467	-3.290121078491211	-3.2603421211242676	-4.122685432434082	-5.101003646850586	-6.148745536804199	-6.997614860534668	-3.442625045776367
ENSG00000252018.1	0.005484487861394882	-0.13165515661239624	0.04474533721804619	-0.14676395058631897	-0.09542104601860046	0.47306549549102783	0.3263835906982422	-0.06780530512332916	-3.026557445526123	-2.2842040061950684	-2.85738468170166	-3.3152449131011963	-4.856237411499023	-4.865756511688232	-6.662364959716797	-3.1248159408569336
ENSG00000228929.1	-0.19768749177455902	-0.8551031351089478	-0.359238862991333	-0.9643064737319946	-0.018298491835594177	-0.4953339993953705	2.289478302001953	0.5797128677368164	-3.169497013092041	-2.672868251800537	-2.9386210441589355	-3.9804577827453613	-4.344031810760498	-5.62624979019165	-7.124459266662598	-2.7757039070129395
ENSG00000121310.16	0.14598502218723297	-0.7242789268493652	-0.3387962579727173	0.4227788746356964	-1.7201064825057983	1.301619291305542	2.4950387477874756	-1.0126551389694214	-3.4114198684692383	-2.5779826641082764	-2.8728280067443848	-4.3456621170043945	-5.5509796142578125	-5.7685980796813965	-8.517770767211914	-3.586422920227051
ENSG00000231866.2	-0.3596119284629822	-0.20731660723686218	-0.40549272298812866	-1.0366559028625488	0.03471539169549942	1.4543447494506836	1.7561088800430298	-0.9982181787490845	-2.9838554859161377	-2.143374443054199	-2.1068897247314453	-3.4845097064971924	-4.759749412536621	-4.559798717498779	-7.703124523162842	-3.4251935482025146
ENSG00000116171.16	0.12429584562778473	0.05760255083441734	0.26922136545181274	-1.015349268913269	-0.668461799621582	-0.8849056363105774	3.9702906608581543	-0.18303361535072327	-3.531198740005493	-3.317256450653076	-3.374485969543457	-4.260498523712158	-5.665459632873535	-6.257793426513672	-7.728516101837158	-3.7162327766418457
ENSG00000264834.1	-0.337765097618103	-0.9274684190750122	-0.6652681231498718	0.4533229172229767	-0.1861504465341568	0.7867239713668823	1.9959425926208496	0.17899367213249207	-4.313150405883789	-3.5832138061523438	-3.7662816047668457	-5.151416301727295	-8.174965858459473	-8.05180549621582	-9.105862617492676	-5.312558174133301
ENSG00000265815.1	-0.22055618464946747	1.0152065753936768	-0.5049450397491455	-0.11343182623386383	-0.7722986340522766	1.5776852369308472	0.864255964756012	-0.805984616279602	-3.4575693607330322	-1.9461095333099365	-2.8767566680908203	-3.7784690856933594	-5.355162620544434	-5.511536598205566	-7.629595756530762	-3.3195254802703857
ENSG00000236360.2	-0.17825628817081451	0.13762220740318298	0.5221980810165405	0.13843220472335815	0.09571366012096405	-0.3130125403404236	0.6047855019569397	-0.2667655646800995	-3.4108173847198486	-3.4516477584838867	-3.553514003753662	-4.457377910614014	-5.857964515686035	-6.4855217933654785	-7.353752613067627	-3.946563482284546
ENSG00000174348.13	-0.31351083517074585	-0.2582775056362152	0.6560251116752625	0.40432462096214294	-0.931627094745636	0.013760246336460114	0.6691843867301941	-0.573788046836853	-3.602567434310913	-2.6782655715942383	-3.349980354309082	-4.047110557556152	-5.009483337402344	-5.793376445770264	-7.940767765045166	-3.506804943084717
ENSG00000157184.6	0.040133845061063766	0.23691383004188538	0.26844796538352966	-0.23696930706501007	-0.8477982878684998	-0.23900440335273743	1.1413309574127197	-0.037513524293899536	-3.7195546627044678	-3.3188865184783936	-3.5353336334228516	-4.253364562988281	-5.565871238708496	-6.110695838928223	-7.3961286544799805	-3.6992735862731934
ENSG00000236723.2	-0.8246028423309326	-0.09655210375785828	-0.540961742401123	0.08694091439247131	-0.46976321935653687	0.4180210530757904	1.2708981037139893	-0.6014182567596436	-3.4722988605499268	-2.848924160003662	-2.839967727661133	-4.636762619018555	-5.109487533569336	-5.500669479370117	-7.631471157073975	-3.501038074493408
ENSG00000162384.13	-0.2520698308944702	-0.40479859709739685	-1.2379792928695679	0.04482182860374451	-0.5895785093307495	-1.0171643495559692	3.2455191612243652	-0.11987391114234924	-4.005155086517334	-3.2681944370269775	-3.2311840057373047	-4.633413791656494	-5.8276872634887695	-6.556511878967285	-8.39395809173584	-3.5194456577301025
ENSG00000162385.10	-0.7440580129623413	-0.3587068021297455	-0.6342093348503113	0.07219851016998291	-0.3345205783843994	-1.1013959646224976	3.241802930831909	-0.30992284417152405	-3.5010008811950684	-3.1763107776641846	-3.0439939498901367	-4.574565410614014	-5.857492446899414	-6.414560317993164	-8.417890548706055	-3.6760900020599365
ENSG00000226754.1	-0.4781418442726135	-0.04679575935006142	-0.32528185844421387	-0.20602375268936157	-0.514009416103363	-0.4610483944416046	0.5875404477119446	-0.6858431100845337	-3.3630597591400146	-2.7302331924438477	-3.1677656173706055	-4.270731449127197	-5.3061323165893555	-6.383883953094482	-7.904742240905762	-3.6412346363067627
ENSG00000157193.15	0.8076562881469727	1.3552733659744263	0.6013599038124084	-0.35077330470085144	0.03255920112133026	0.27519574761390686	2.665548801422119	-0.4750737249851227	-3.9999616146087646	-3.3014190196990967	-3.360581874847412	-4.587856292724609	-5.584861755371094	-6.472086429595947	-7.618819713592529	-3.7304508686065674
ENSG00000225030.1	0.033824142068624496	0.7895199060440063	-0.10548052936792374	-0.06178659200668335	-0.3906043767929077	0.46011558175086975	0.5116286873817444	-0.6224352121353149	-3.8668155670166016	-2.705286979675293	-3.417509078979492	-5.144158363342285	-5.202353477478027	-6.922459125518799	-7.3628034591674805	-3.823169708251953
ENSG00000225675.2	-0.40667998790740967	-0.0946144163608551	-0.09931773692369461	-0.13692842423915863	0.3489697277545929	0.30282241106033325	0.7794679999351501	-0.8694751262664795	-4.1526713371276855	-2.981902599334717	-3.4374895095825195	-4.49847412109375	-5.706378936767578	-6.347616195678711	-8.68526840209961	-3.6418261528015137
ENSG00000174332.5	0.3670642673969269	-0.8393791913986206	-0.054430313408374786	1.2392234802246094	-0.04262523353099823	0.6042417287826538	1.1898891925811768	-0.44260379672050476	-3.7198894023895264	-2.2826006412506104	-2.9332528114318848	-3.7143502235412598	-4.929418563842773	-5.425251007080078	-8.249220848083496	-3.402611494064331
ENSG00000239007.1	-0.6736104488372803	-0.31397590041160583	-0.8272364139556885	1.1218098402023315	-0.6467249989509583	1.3845994472503662	0.49320271611213684	-0.8019276857376099	-3.4732398986816406	-2.1647536754608154	-2.402864456176758	-3.327958106994629	-5.413407325744629	-5.422119140625	-8.678878784179688	-3.7661352157592773
ENSG00000058804.11	-0.1745002120733261	0.4243833124637604	-0.03251654654741287	-1.0562607049942017	-0.4702377915382385	-0.765048623085022	2.282747983932495	-0.1718708574771881	-4.257101535797119	-3.283982753753662	-3.5747857093811035	-4.7278733253479	-5.873373985290527	-6.851423263549805	-8.491170883178711	-3.7988386154174805
ENSG00000058799.13	-1.0796098709106445	-0.43153199553489685	0.4571623206138611	0.028220683336257935	-0.5578005909919739	-1.4852668046951294	3.1576507091522217	-0.7232588529586792	-3.8320462703704834	-3.2371273040771484	-3.311192035675049	-4.43294620513916	-5.579567909240723	-6.408116340637207	-7.631819725036621	-3.60827374458313
ENSG00000081870.11	-0.20045046508312225	-0.8016539812088013	-1.0428823232650757	-0.5690668821334839	-0.35679173469543457	-0.7417722344398499	2.3901965618133545	-0.6020969152450562	-4.1284685134887695	-3.1489627361297607	-3.4208006858825684	-4.657717704772949	-5.976825714111328	-6.878070831298828	-8.625076293945312	-3.59455943107605
ENSG00000116212.14	-0.5385327339172363	-0.05677590146660805	0.3396749496459961	-0.03267627954483032	-0.1767461746931076	-0.7685328722000122	2.5084617137908936	-0.29971423745155334	-3.8489277362823486	-3.545813798904419	-3.4329934120178223	-4.423060894012451	-5.615398406982422	-6.488773345947266	-7.506516933441162	-3.888270854949951
ENSG00000116209.11	-0.7456413507461548	-0.07659849524497986	-0.28589147329330444	-0.8977161645889282	-1.3711298704147339	-1.9700231552124023	4.341794967651367	0.0717984139919281	-3.646900177001953	-3.316986083984375	-3.297822952270508	-4.144382953643799	-5.4951171875	-6.201953411102295	-7.778792858123779	-3.5751490592956543
ENSG00000280378.1	-1.1381150484085083	0.02026056870818138	-0.47060367465019226	0.17794343829154968	-0.9583432078361511	0.38347750902175903	0.43374088406562805	-0.21310031414031982	-3.7529184818267822	-2.4933581352233887	-3.2056102752685547	-4.076554775238037	-5.359996795654297	-5.765791416168213	-8.277896881103516	-3.689527988433838
ENSG00000116205.11	-0.08472143113613129	-0.3269610106945038	-0.2958097457885742	-0.545622706413269	-1.2908244132995605	-0.018920622766017914	1.8429696559906006	-0.49897220730781555	-3.6145224571228027	-2.9469993114471436	-3.5778040885925293	-4.388138771057129	-5.334074974060059	-6.097051620483398	-8.08420467376709	-3.636524200439453
ENSG00000225183.1	-0.288044273853302	-0.25839298963546753	0.06185544282197952	-0.8917768001556396	0.0031992122530937195	0.5340890884399414	0.29314297437667847	-0.5128887891769409	-4.348928451538086	-2.833453893661499	-3.7177295684814453	-4.58798360824585	-5.784758567810059	-6.606060981750488	-8.88648796081543	-4.0370306968688965
ENSG00000215883.10	-0.26534977555274963	0.122582346200943	-0.4706137478351593	-0.24164804816246033	-0.4574737548828125	0.1227927878499031	0.9492020010948181	-0.5523185729980469	-3.8698480129241943	-2.901902675628662	-3.3360118865966797	-4.561583995819092	-5.526651382446289	-6.0975775718688965	-8.006916046142578	-3.543727159500122
ENSG00000116221.15	0.011818062514066696	-0.2593277394771576	-0.2902781367301941	0.12684562802314758	-0.01059587299823761	-1.1873637437820435	3.828155517578125	-0.17024651169776917	-3.7377467155456543	-3.2330477237701416	-3.2828617095947266	-4.326638698577881	-5.635438919067383	-6.496379852294922	-7.981655597686768	-3.5159683227539062
ENSG00000157216.15	-0.5575151443481445	-0.10319647192955017	-0.6401501297950745	0.04358157515525818	-0.215367391705513	-0.4630163609981537	4.2175679206848145	-0.1283680498600006	-3.3964810371398926	-2.807939291000366	-3.1698198318481445	-4.127448558807373	-5.501375198364258	-5.768403053283691	-7.533483028411865	-3.3972597122192383
ENSG00000162390.17	0.8003820180892944	0.34056785702705383	-0.8011736273765564	0.16996386647224426	-2.390300989151001	0.8830662369728088	2.3467931747436523	-1.7729829549789429	-3.0626227855682373	-2.3581607341766357	-2.8471593856811523	-4.2774858474731445	-5.069833755493164	-5.368731498718262	-7.28899621963501	-3.3330204486846924
ENSG00000184313.19	0.4596256613731384	0.19420254230499268	-0.41685107350349426	0.024534881114959717	-1.2821059226989746	0.6220311522483826	0.5540132522583008	-0.9078284502029419	-2.982348918914795	-2.2678298950195312	-2.7435460090637207	-3.7805256843566895	-4.762479782104492	-5.106125354766846	-7.3896260261535645	-3.0469398498535156
ENSG00000243725.6	-0.5162909030914307	0.19058528542518616	-0.13958996534347534	-0.39495763182640076	-0.09243740141391754	-0.4814629852771759	0.8451249003410339	-0.1682763397693634	-3.7535459995269775	-3.072601556777954	-3.0998482704162598	-4.4576616287231445	-5.35504150390625	-6.04746675491333	-7.884803295135498	-3.455461263656616
ENSG00000162396.5	-0.5950675010681152	0.5750342607498169	-0.5157557129859924	-0.003952652215957642	0.009408310055732727	-0.7308191657066345	1.8808228969573975	-0.35186710953712463	-3.987996816635132	-3.1961185932159424	-3.2992348670959473	-4.753635883331299	-5.301060676574707	-6.413101673126221	-8.006912231445312	-3.6942408084869385
ENSG00000006555.10	-0.6981245279312134	-0.09723111987113953	0.11911561340093613	0.4799366891384125	0.7051525712013245	0.16322854161262512	0.9598349928855896	-0.6207040548324585	-3.3571736812591553	-2.6650609970092773	-2.574277877807617	-3.980438232421875	-4.686659336090088	-5.351107597351074	-7.252343654632568	-3.2939651012420654
ENSG00000162398.11	-0.5842646956443787	0.22104349732398987	-0.764197587966919	0.0006221532821655273	1.1584597826004028	0.27260783314704895	1.6347253322601318	-0.6017946004867554	-3.500054121017456	-3.0415709018707275	-2.7060413360595703	-4.007662296295166	-5.150312423706055	-5.719017028808594	-7.2970380783081055	-3.298938512802124
ENSG00000116133.11	-2.6592016220092773	1.237230896949768	-1.0458569526672363	0.18563053011894226	-1.9978045225143433	-2.8138699531555176	5.398199558258057	-0.02490130066871643	-3.178248643875122	-3.6590194702148438	-3.619309902191162	-4.73948335647583	-4.972842216491699	-6.40821647644043	-7.2866597175598145	-3.962702989578247
ENSG00000233203.6	-0.4244983196258545	-0.034246090799570084	-0.4285404086112976	-0.2929500639438629	0.23358072340488434	0.3826950490474701	0.26710301637649536	-0.3366418182849884	-3.40714168548584	-2.5644538402557373	-2.614044189453125	-3.954970121383667	-5.015708923339844	-5.513905048370361	-7.823216915130615	-3.3671019077301025
ENSG00000143001.4	-0.3818438649177551	-0.6702979803085327	0.09588649123907089	0.18231233954429626	0.1536417007446289	0.056089453399181366	0.2963675260543823	0.044744789600372314	-3.924604654312134	-2.671851396560669	-3.136547088623047	-3.7641234397888184	-5.696674346923828	-5.758947849273682	-7.962191104888916	-3.6377551555633545
ENSG00000162402.13	-0.4025089740753174	0.2014237940311432	0.10558205097913742	-0.391361266374588	-1.0051709413528442	0.03844586759805679	4.5606207847595215	-0.07920899987220764	-4.062711238861084	-3.3681387901306152	-3.5154061317443848	-4.665529727935791	-5.891349792480469	-6.886932373046875	-7.888179302215576	-3.887507677078247
ENSG00000162407.8	0.6372746229171753	0.6406084299087524	2.149954319000244	-0.7648365497589111	-2.1460564136505127	-0.853898823261261	5.908288955688477	-1.2720831632614136	-3.038501501083374	-3.27797794342041	-3.404928207397461	-4.151655673980713	-5.36811637878418	-5.627317428588867	-6.579929351806641	-3.7281460762023926
ENSG00000162409.10	-0.6509205102920532	0.6552799940109253	-0.2683883309364319	-1.2610021829605103	1.2124618291854858	-0.43738099932670593	3.5006790161132812	-0.49055638909339905	-3.7120110988616943	-3.245447874069214	-2.8978376388549805	-4.507203578948975	-5.542862892150879	-6.2452545166015625	-7.551499366760254	-3.5473594665527344
ENSG00000173406.15	-0.2387724667787552	0.2911618649959564	-0.17931747436523438	-0.2734246850013733	0.03553684055805206	0.055003948509693146	0.9314749240875244	-0.7207056283950806	-3.6404287815093994	-2.8355112075805664	-3.185845375061035	-4.210054397583008	-5.2020463943481445	-6.208366870880127	-7.770251274108887	-4.019276142120361
ENSG00000236888.1	-0.41044121980667114	-0.00308213010430336	-0.5646466612815857	-0.09062011539936066	0.030823297798633575	0.7037839293479919	0.3640231192111969	-0.4944266676902771	-3.743671417236328	-3.0421440601348877	-2.7981438636779785	-4.533270835876465	-5.164397239685059	-5.560542583465576	-8.399036407470703	-3.6899139881134033
ENSG00000223416.3	-0.012997407466173172	0.21405357122421265	-0.3284141719341278	-0.32335060834884644	0.12740014493465424	-0.14192116260528564	0.33895576000213623	-1.089278221130371	-3.9851574897766113	-2.6204464435577393	-2.809166431427002	-4.484434604644775	-5.375018119812012	-6.4971232414245605	-8.361973762512207	-3.396378993988037
ENSG00000233216.1	-0.17106463015079498	-0.07396760582923889	-0.31826505064964294	0.07734227180480957	-0.25074124336242676	0.4405466318130493	0.44383499026298523	-0.8545955419540405	-3.7414820194244385	-2.370607376098633	-2.5565972328186035	-3.7082738876342773	-4.089620590209961	-5.437480449676514	-5.924578666687012	-3.581199884414673
ENSG00000162600.11	-0.0364827997982502	-1.2203642129898071	-0.7509215474128723	-0.8108395338058472	-1.472185492515564	-0.19432386755943298	3.0286142826080322	-0.6902004480361938	-3.292912006378174	-2.7073307037353516	-2.717996597290039	-4.431966781616211	-4.61343240737915	-5.138184070587158	-7.180389881134033	-3.1920673847198486
ENSG00000185839.3	-0.39863133430480957	-0.8908106088638306	-0.03262946754693985	-0.14720353484153748	-0.7803386449813843	-0.5202853679656982	1.001518964767456	-0.31705883145332336	-2.936762809753418	-2.324585437774658	-2.642228603363037	-3.6766648292541504	-4.421603202819824	-5.153811454772949	-6.841644763946533	-2.6961915493011475
ENSG00000162601.9	-0.5137007236480713	0.14498916268348694	-0.9071808457374573	-1.0181946754455566	-0.9062194228172302	0.8522992730140686	3.667632579803467	0.24105843901634216	-3.8500053882598877	-2.87554931640625	-3.111003875732422	-4.227465629577637	-5.819780349731445	-6.208826065063477	-7.580294132232666	-3.8044068813323975
ENSG00000177606.6	-0.8185553550720215	-0.08458265662193298	2.894378662109375	1.1408278942108154	-3.427410840988159	-1.4856418371200562	2.9865617752075195	-1.7213925123214722	-4.2312774658203125	-2.3997974395751953	-4.093603134155273	-5.095982074737549	-6.597451210021973	-7.016116619110107	-10.196309089660645	-4.479806900024414
ENSG00000234807.5	-0.6363668441772461	-0.36689886450767517	-1.3366459608078003	-0.7317507266998291	-2.1233086585998535	-0.3740810751914978	1.1614809036254883	-0.16669586300849915	-3.8303401470184326	-2.6923296451568604	-4.308220386505127	-4.482375144958496	-5.938675880432129	-6.773744106292725	-9.310822486877441	-4.671731948852539
ENSG00000232453.6	0.3588772416114807	-0.2505722641944885	-0.036468081176280975	-0.39420294761657715	-0.5552468299865723	0.026888109743595123	0.33498501777648926	-0.45599237084388733	-3.454906463623047	-2.5848073959350586	-3.1650819778442383	-4.016932010650635	-5.082819938659668	-5.926971912384033	-7.454610824584961	-3.4594666957855225
ENSG00000270457.1	0.1394542008638382	0.16795948147773743	-0.467519074678421	-0.5941752195358276	0.3790552616119385	-0.05439729243516922	0.3522900640964508	0.14094096422195435	-3.7276227474212646	-2.863152265548706	-2.9844918251037598	-4.354759693145752	-5.779196739196777	-6.135379791259766	-8.405374526977539	-3.3776299953460693
ENSG00000172456.17	0.5408738851547241	-0.9336488246917725	-0.048717208206653595	-0.39257290959358215	-0.6277732849121094	-0.06607826799154282	1.9917759895324707	-0.1346321403980255	-3.5661001205444336	-2.6481587886810303	-2.8751444816589355	-4.093923091888428	-5.283090591430664	-5.672043323516846	-7.782699108123779	-3.204984426498413
ENSG00000134709.10	-1.3586355447769165	-0.101813405752182	-0.762441098690033	-0.9650676250457764	1.8391679525375366	-0.1912512481212616	3.8771276473999023	-0.5793343782424927	-3.412012815475464	-3.186182975769043	-2.7401156425476074	-4.333467483520508	-5.391816139221191	-6.111917495727539	-7.925747394561768	-3.547832489013672
ENSG00000134716.9	-0.5734401941299438	-0.2743929326534271	-0.41013747453689575	-0.5604093074798584	-2.490661144256592	-0.5555424094200134	3.4495320320129395	-0.053903013467788696	-3.4357006549835205	-2.4541094303131104	-2.802912712097168	-3.852705955505371	-5.489789962768555	-5.70020866394043	-7.1532063484191895	-3.262533187866211
ENSG00000162598.13	-0.4805838465690613	-0.3994046151638031	1.3466078042984009	-1.4960147142410278	-1.611684799194336	0.6092686057090759	0.6769403219223022	-1.7655552625656128	-3.8247904777526855	-2.7913620471954346	-3.2612557411193848	-4.360330581665039	-6.888331413269043	-6.761143207550049	-9.630805015563965	-3.9831278324127197
ENSG00000226476.3	-0.28600919246673584	0.5400537252426147	-0.37390556931495667	-0.6676241159439087	0.10985006392002106	0.6532341241836548	1.8740192651748657	-0.8888536691665649	-3.288067102432251	-2.4707489013671875	-2.5077972412109375	-3.8817453384399414	-4.8078155517578125	-5.390380382537842	-6.878761291503906	-3.3287062644958496
ENSG00000231252.2	0.5053393840789795	0.24078026413917542	-0.2737613320350647	-0.38522350788116455	-1.5060749053955078	0.5949596762657166	1.271152377128601	-1.3765685558319092	-3.340083599090576	-2.644345760345459	-2.924976348876953	-4.3087663650512695	-5.327300071716309	-5.586161136627197	-8.217876434326172	-3.4567172527313232
ENSG00000162599.15	0.7029519081115723	0.2228647768497467	1.413057804107666	-0.6632192134857178	-2.4413254261016846	-0.24162539839744568	5.153438568115234	-1.2898176908493042	-3.3124115467071533	-2.8847298622131348	-3.668682098388672	-4.155325889587402	-5.641119003295898	-5.91976261138916	-7.216503620147705	-3.7135579586029053
ENSG00000237928.5	-0.05592508986592293	-0.22504441440105438	-0.18947932124137878	-1.242199182510376	-1.132959008216858	-0.3390602469444275	0.2825968265533447	-1.1714521646499634	-3.431576728820801	-2.9265189170837402	-3.5479397773742676	-4.720182418823242	-6.12693977355957	-6.097517967224121	-8.861909866333008	-4.130384922027588
ENSG00000270742.1	0.03147980198264122	0.12693622708320618	0.3115638494491577	0.08761496841907501	-3.032055616378784	1.0999075174331665	1.9914993047714233	-0.6757920980453491	-3.052431106567383	-2.1386008262634277	-3.5677547454833984	-4.40742301940918	-4.741902828216553	-5.984416484832764	-7.988924026489258	-3.824028730392456
ENSG00000162604.12	-0.07081900537014008	-0.39317092299461365	-0.14494246244430542	-1.1417604684829712	-0.332522451877594	-0.7456526756286621	3.1083903312683105	-0.3733769953250885	-3.45574688911438	-3.1096067428588867	-3.1266355514526367	-4.160987854003906	-5.451949119567871	-6.040528297424316	-7.419098854064941	-3.7016451358795166
ENSG00000271200.1	-0.06282667815685272	-0.7454183101654053	-0.5520426630973816	0.40351709723472595	0.046524494886398315	-0.14421415328979492	0.8247054219245911	-0.2449418604373932	-4.606130123138428	-3.178191661834717	-3.656494140625	-5.071970462799072	-6.185137748718262	-6.694182395935059	-8.163881301879883	-3.4952101707458496
ENSG00000132849.19	-0.360376238822937	-0.3476315438747406	-0.25638920068740845	-0.6308964490890503	-0.10111846029758453	0.9684928059577942	3.195464611053467	0.3288632333278656	-4.076437950134277	-3.3160316944122314	-3.2593436241149902	-4.57106876373291	-5.999422073364258	-6.759331703186035	-8.942889213562012	-4.087777614593506
ENSG00000200575.1	-0.6745977401733398	0.329585999250412	-0.33780550956726074	-0.12202227115631104	0.2382712960243225	1.1846352815628052	0.7851065397262573	0.2444646954536438	-2.7971444129943848	-2.6565585136413574	-1.5373554229736328	-2.6117286682128906	-5.094320297241211	-4.934485912322998	-7.64317512512207	-3.568411111831665
ENSG00000212360.1	-0.6386499404907227	-0.26172080636024475	-0.2299957275390625	-0.2254563570022583	0.14214825630187988	1.260825514793396	0.8105385899543762	0.592802882194519	-3.500580072402954	-2.5079643726348877	-1.8124449253082275	-2.9186158180236816	-4.663003444671631	-3.4721732139587402	-6.370748996734619	-3.5275192260742188
ENSG00000236646.1	-0.30338868498802185	-0.10189220309257507	-0.7270775437355042	0.005487807095050812	-0.055295124650001526	0.9489731192588806	0.6373935341835022	0.44968029856681824	-3.35341215133667	-2.546046495437622	-2.646711826324463	-3.5141634941101074	-4.912235260009766	-5.118037223815918	-7.095118522644043	-3.345299482345581
ENSG00000242860.3	-0.7298736572265625	-0.049298737198114395	-0.7838620543479919	-0.12777894735336304	-0.30561602115631104	0.7675386071205139	0.19828686118125916	-0.21324774622917175	-3.638927936553955	-2.4098048210144043	-2.3251595497131348	-3.434462308883667	-5.257159233093262	-5.211606502532959	-7.9523515701293945	-3.3069427013397217
ENSG00000263908.1	-0.06801669299602509	0.211857870221138	-0.4506886601448059	-0.5249190330505371	-0.25566625595092773	2.1052334308624268	0.5423516631126404	0.08567111194133759	-2.2609386444091797	-2.311380386352539	-2.97922420501709	-2.4488930702209473	-4.534131050109863	-4.159669399261475	-6.601058483123779	-3.1935441493988037
ENSG00000240563.1	-0.29472994804382324	-0.0014629103243350983	0.01455535739660263	-0.23979440331459045	0.4341546893119812	0.22831657528877258	0.22581768035888672	-0.006987646222114563	-3.189379930496216	-2.2453393936157227	-2.7324328422546387	-3.678636312484741	-4.717333793640137	-5.342022895812988	-7.278327941894531	-3.5495080947875977
ENSG00000132854.18	-1.036230206489563	0.21641042828559875	-0.7248886227607727	0.12017585337162018	-1.035214900970459	-0.501660168170929	0.43048280477523804	-0.29236647486686707	-3.2988221645355225	-2.9163763523101807	-3.4098057746887207	-4.135273456573486	-5.254240036010742	-5.649225234985352	-7.558745861053467	-3.695342540740967
ENSG00000162607.12	-0.002624262124300003	-0.00568065419793129	0.2923765778541565	-1.261083960533142	-1.2250694036483765	-0.8646144270896912	3.9400267601013184	0.2255156934261322	-3.578650712966919	-3.333456516265869	-3.451213836669922	-4.251254558563232	-5.474912643432617	-6.23561429977417	-7.4596452713012695	-3.54585337638855
ENSG00000116641.17	-0.015474606305360794	0.20633402466773987	1.0046571493148804	-0.7253010272979736	-1.0031514167785645	0.43656280636787415	3.278543710708618	-1.170366644859314	-3.497802257537842	-3.0779852867126465	-3.2215709686279297	-4.503901958465576	-5.248854637145996	-5.826650619506836	-7.055339336395264	-3.4773733615875244
ENSG00000213703.2	-0.10652737319469452	-0.21839556097984314	-0.6095226407051086	0.1173902153968811	-1.1738550662994385	0.9312810897827148	1.3709816932678223	-0.487922340631485	-3.0088508129119873	-2.435512065887451	-2.4460864067077637	-3.7788665294647217	-4.220948219299316	-5.034139156341553	-6.8318891525268555	-3.120007038116455
ENSG00000235545.1	-0.17238934338092804	-0.08209154009819031	0.7648730874061584	-0.1556626856327057	-1.0118448734283447	0.9530227184295654	1.5268628597259521	-1.6851253509521484	-3.761488676071167	-2.592275857925415	-3.0628981590270996	-4.703020095825195	-5.403969764709473	-6.033217430114746	-7.973487377166748	-3.4855525493621826
ENSG00000125703.14	-0.6527531147003174	-0.014707420021295547	-1.046725869178772	-1.684845209121704	-2.4750237464904785	-0.9050368666648865	4.36714506149292	-0.571377158164978	-3.656538486480713	-2.9795241355895996	-3.3153438568115234	-3.9862146377563477	-5.274829864501953	-6.0324506759643555	-7.572855472564697	-3.651885509490967
ENSG00000234318.1	-1.1094287633895874	0.22847461700439453	-0.15321749448776245	-0.2526390552520752	-0.35619795322418213	-0.33190393447875977	0.17911887168884277	-0.8192480802536011	-3.0791406631469727	-2.1587350368499756	-2.667508125305176	-3.6688051223754883	-4.5614471435546875	-5.057765007019043	-6.720465183258057	-3.331566333770752
ENSG00000088035.15	-0.812964916229248	0.30994537472724915	-0.6398623585700989	-0.8339047431945801	-0.4014328718185425	0.2357787787914276	1.9170194864273071	-0.1421903669834137	-4.107794761657715	-3.111492156982422	-3.4797825813293457	-4.745595932006836	-5.895702362060547	-6.738086223602295	-8.496369361877441	-3.973130226135254
ENSG00000142856.16	-0.13634155690670013	-0.8212893009185791	-0.1858159303665161	-0.8585593700408936	-0.2613287568092346	0.23609164357185364	1.6633085012435913	-0.7866746187210083	-4.184051513671875	-2.735748291015625	-3.039616107940674	-3.9539546966552734	-5.299654960632324	-5.9418439865112305	-7.7621893882751465	-2.739267110824585
ENSG00000203965.12	-1.3470113277435303	-0.539394736289978	-0.004607982933521271	-0.5742923021316528	0.05446608364582062	-0.00783749669790268	2.703568935394287	-1.1593917608261108	-3.7160117626190186	-3.3179755210876465	-3.170179843902588	-4.457366466522217	-5.43704891204834	-6.397486209869385	-8.413651466369629	-3.6439034938812256
ENSG00000251720.1	-0.008225921541452408	-0.12677690386772156	-0.05966193228960037	-0.33581990003585815	-0.23399530351161957	0.4563283622264862	-0.09774332493543625	-0.3122996687889099	-1.838245153427124	-1.436191201210022	-2.0894036293029785	-3.273850440979004	-3.2518515586853027	-3.8677966594696045	-5.819406032562256	-2.5242018699645996
ENSG00000116652.6	-1.2891415357589722	-0.24014410376548767	-0.09699226170778275	-0.3715352416038513	-0.11429068446159363	1.1592687368392944	1.5133579969406128	-0.4608074724674225	-3.5193593502044678	-2.085986375808716	-2.4146556854248047	-3.8261494636535645	-4.896059989929199	-5.845698833465576	-8.116312980651855	-3.306241750717163
ENSG00000079739.15	0.7763901948928833	0.30027785897254944	1.147682547569275	-0.08388349413871765	-0.8073235750198364	-0.6292106509208679	4.421734809875488	-0.5561341047286987	-3.732916831970215	-3.36103892326355	-3.4513468742370605	-4.66756534576416	-5.878243446350098	-6.504488945007324	-7.818813323974609	-3.7921125888824463
ENSG00000244256.3	-0.3095496594905853	-0.172922283411026	0.1273329257965088	0.06245237588882446	-0.612212598323822	0.5033201575279236	0.7172346115112305	-0.8221782445907593	-3.8584816455841064	-2.775555372238159	-2.6854143142700195	-4.295956611633301	-5.15921688079834	-6.123624801635742	-8.498348236083984	-4.102480411529541
ENSG00000185483.11	0.18035994470119476	0.11333563923835754	0.044705234467983246	-0.14847776293754578	-0.5736530423164368	-0.07294365018606186	0.6483626365661621	-0.6628035306930542	-3.9314913749694824	-2.922666549682617	-3.4962592124938965	-4.717859745025635	-5.8181562423706055	-6.5360846519470215	-8.37021255493164	-3.723872423171997
ENSG00000158966.13	-0.5286810398101807	-0.5819658041000366	1.3310939073562622	0.10181930661201477	-0.08820672333240509	-0.09282811731100082	5.273465633392334	-0.42880573868751526	-3.434070110321045	-3.1716527938842773	-2.832756996154785	-4.304537296295166	-5.189703941345215	-5.797157287597656	-6.837859630584717	-3.2017595767974854
ENSG00000264470.1	-0.9770057201385498	0.6346673965454102	0.8818904161453247	0.2142494022846222	0.15241554379463196	0.5710238814353943	0.9041210412979126	-0.7083967924118042	-2.9167165756225586	-3.025052309036255	-3.391942024230957	-3.5867841243743896	-5.057792663574219	-5.401461601257324	-7.206161975860596	-4.016440391540527
ENSG00000162437.14	-0.23612426221370697	-0.04088244214653969	0.9674840569496155	-0.515254020690918	-0.08668626844882965	0.2924833595752716	3.7652196884155273	-0.9017394781112671	-3.513720750808716	-3.0468292236328125	-3.102266788482666	-4.158253192901611	-5.309447288513184	-5.894095420837402	-7.266209125518799	-3.524193525314331
ENSG00000162434.11	-0.3304232358932495	0.5257726907730103	1.3853497505187988	-0.23738345503807068	-1.0329962968826294	-0.8843715786933899	5.151944637298584	0.005169957876205444	-3.8791399002075195	-3.616886854171753	-3.7079672813415527	-4.516312599182129	-5.856808662414551	-6.5403242111206055	-7.838608264923096	-3.8248443603515625
ENSG00000226891.7	1.2199279069900513	0.15550628304481506	-1.3733476400375366	-0.8501589298248291	-0.9182136654853821	1.6061370372772217	1.710820198059082	0.42279282212257385	-3.881666421890259	-2.4443514347076416	-3.009559154510498	-4.194924831390381	-5.213174819946289	-6.229756832122803	-7.805516242980957	-4.006610870361328
ENSG00000185031.6	1.1816232204437256	0.711882472038269	-1.5136220455169678	-0.8285584449768066	-0.7710206508636475	1.7515209913253784	1.885796308517456	0.638970136642456	-3.677417516708374	-2.6721129417419434	-2.9745702743530273	-4.161791801452637	-5.449970245361328	-6.610368728637695	-7.958315849304199	-4.162497043609619
ENSG00000272506.1	1.216169834136963	0.5738312602043152	-1.6762222051620483	-0.32149291038513184	-1.4700018167495728	1.7565584182739258	1.792129397392273	0.5749531984329224	-3.416797399520874	-2.285597562789917	-2.833529472351074	-3.7965123653411865	-4.80438232421875	-6.220638275146484	-7.57321310043335	-4.366905689239502
ENSG00000212257.1	1.2326323986053467	0.4061647951602936	-2.6130008697509766	-0.8710238933563232	-1.9650672674179077	2.7142481803894043	3.362541913986206	1.4443223476409912	-4.669347763061523	-2.534480333328247	-3.8951587677001953	-3.2033305168151855	-5.6347856521606445	-6.931156158447266	-9.844752311706543	-4.602872848510742
ENSG00000265996.1	0.8543044924736023	-0.09597429633140564	-3.1162824630737305	-1.7698367834091187	-1.194373607635498	-1.0408744812011719	2.9617960453033447	-1.5979236364364624	-2.0546958446502686	-2.7156689167022705	-0.9050958156585693	-3.0504045486450195	-4.082756042480469	-4.233883857727051	-6.425500392913818	-0.9402430653572083
ENSG00000199135.1	-0.8521497249603271	-0.2053050696849823	-0.564211905002594	-1.0295910835266113	-0.7497515082359314	0.5702998638153076	2.0362727642059326	0.53734290599823	-2.5308046340942383	-2.317507266998291	-2.618666648864746	-4.307173252105713	-5.442058563232422	-5.701506614685059	-7.844802379608154	-3.026825189590454
ENSG00000231485.1	-0.6581895351409912	0.6624516248703003	-1.2247779369354248	0.6984220743179321	-0.9145188927650452	-0.6347610950469971	1.021366834640503	-0.31014636158943176	-4.753279209136963	-3.2622008323669434	-4.020787715911865	-4.4910888671875	-6.23463249206543	-6.2979230880737305	-8.988100051879883	-3.9391496181488037
ENSG00000162433.14	1.0280460119247437	0.2618462145328522	1.931119680404663	-0.6778764724731445	-0.31494951248168945	-0.08900841325521469	4.880117416381836	-1.3657711744308472	-3.0384714603424072	-2.9261419773101807	-3.089564323425293	-3.6112430095672607	-4.56968879699707	-5.109710693359375	-4.985008716583252	-3.0992307662963867
ENSG00000231622.1	-0.0559224970638752	0.25539544224739075	0.0227198526263237	-0.06531539559364319	-0.35138511657714844	1.1871533393859863	1.2306783199310303	-1.207375407218933	-3.3742940425872803	-2.5114011764526367	-2.7748851776123047	-4.20684289932251	-5.29957389831543	-5.623140811920166	-7.670216083526611	-3.8000152111053467
ENSG00000116675.15	-1.156915545463562	0.39595046639442444	-1.3996530771255493	-0.6443817615509033	-0.9533351063728333	-2.30958890914917	6.53158712387085	0.5960985422134399	-3.737295150756836	-3.288707733154297	-3.335142135620117	-4.135192394256592	-5.519402503967285	-6.1490983963012695	-7.530845642089844	-3.445019483566284
ENSG00000222624.1	-0.7501083612442017	0.05489971861243248	-1.6165975332260132	0.5158118009567261	-0.8116402626037598	0.6485480666160583	0.6409990787506104	-0.03435733914375305	-2.7749316692352295	-1.5317203998565674	-1.9679639339447021	-2.623721122741699	-3.841599702835083	-5.07802152633667	-6.984409809112549	-3.3346164226531982
ENSG00000213625.8	0.6586625576019287	-0.2383788526058197	1.258864164352417	-1.1676276922225952	-1.3829842805862427	-0.0015391930937767029	3.9531989097595215	0.5216759443283081	-3.513432264328003	-3.4189999103546143	-3.5677108764648438	-4.086560249328613	-5.7731828689575195	-6.27370548248291	-7.512143135070801	-4.003945350646973
ENSG00000116678.18	0.1596677452325821	-0.25154682993888855	0.8547799587249756	-0.32741042971611023	-0.34966063499450684	0.13529470562934875	2.036013603210449	0.028436630964279175	-3.943776845932007	-3.5882537364959717	-3.7539191246032715	-5.030104160308838	-5.816171646118164	-6.719657897949219	-8.364535331726074	-4.1761474609375
ENSG00000237852.1	-0.301369845867157	-0.8594589829444885	-0.0794006809592247	-0.0932731032371521	-0.5782648921012878	0.6292278170585632	0.7156310081481934	-0.34048596024513245	-3.4861018657684326	-2.7821974754333496	-3.3513846397399902	-4.126479148864746	-5.47120475769043	-6.068140983581543	-8.422117233276367	-4.131353855133057
ENSG00000184588.17	-0.6578236818313599	-0.3341878354549408	-0.10260910540819168	-0.5168846845626831	-1.4219441413879395	-1.1975806951522827	5.023531436920166	0.4659522473812103	-3.7724578380584717	-3.2260422706604004	-3.4974794387817383	-4.2126898765563965	-5.672031402587891	-6.517401218414307	-7.850754737854004	-3.676957368850708
ENSG00000118473.21	-1.2568832635879517	0.37500014901161194	-1.3153809309005737	-0.9341859817504883	1.0770008563995361	-0.6037047505378723	5.614426136016846	-0.2558263838291168	-3.314326047897339	-2.8636271953582764	-2.40272855758667	-3.791672706604004	-5.135444641113281	-5.717362403869629	-7.11074161529541	-3.226576566696167
ENSG00000264720.3	-1.6785696744918823	-0.20879825949668884	-0.9890691637992859	-1.0141286849975586	-0.8834829926490784	1.9582167863845825	5.287912368774414	0.6282294988632202	-4.724825382232666	-3.417423725128174	-3.938382625579834	-5.352288246154785	-7.455719947814941	-8.012833595275879	-9.809891700744629	-4.006294250488281
ENSG00000152760.9	-0.9610080718994141	-0.2357029914855957	0.5140865445137024	-2.317622184753418	-1.9938288927078247	0.33202219009399414	1.1788791418075562	-3.2959203720092773	-4.515314102172852	-3.2943356037139893	-4.113681316375732	-6.0220255851745605	-7.417111396789551	-8.151284217834473	-10.520094871520996	-5.047645568847656
ENSG00000152763.16	0.09701664745807648	-1.374658226966858	0.35145217180252075	-2.2192821502685547	-2.036559581756592	0.060678042471408844	2.607165813446045	-1.978256344795227	-3.8852250576019287	-2.828540325164795	-3.090183734893799	-4.560701370239258	-5.725986480712891	-6.609926223754883	-8.960519790649414	-3.5834169387817383
ENSG00000198160.14	-0.40975868701934814	-0.5621989965438843	0.34937018156051636	-1.1358667612075806	-0.9332018494606018	-0.23735591769218445	3.545300245285034	-0.13899770379066467	-3.7974703311920166	-3.058588981628418	-3.405280590057373	-4.144227981567383	-5.467567443847656	-6.242031097412109	-7.653071880340576	-3.5847702026367188
ENSG00000116704.7	-1.2077443599700928	0.0313047431409359	-0.19123953580856323	-0.5419281721115112	-0.9144924283027649	0.23523059487342834	2.8189809322357178	-0.2928084433078766	-4.221491813659668	-3.2598180770874023	-3.398360252380371	-4.631208896636963	-5.902671813964844	-6.730484485626221	-8.30152416229248	-3.9320051670074463
ENSG00000203963.11	-0.19079074263572693	0.0015451721847057343	-0.00443924218416214	-0.786126971244812	-0.44104331731796265	-0.005662158131599426	0.055140458047389984	-0.9010477066040039	-3.568532705307007	-2.918843984603882	-3.449880599975586	-4.346848011016846	-5.580619812011719	-6.171353340148926	-7.927402973175049	-4.0645551681518555
ENSG00000275678.1	-0.3741726875305176	-0.1239607036113739	0.5969953536987305	-0.9162067174911499	-0.4488787055015564	0.11835124343633652	0.3009783923625946	-1.206329584121704	-3.833719491958618	-3.1195693016052246	-3.343430519104004	-4.379981517791748	-6.032062530517578	-6.348631381988525	-8.2848482131958	-3.9817955493927
ENSG00000081985.10	0.2650814354419708	-0.11734256148338318	-0.25025156140327454	-0.40896737575531006	0.18573617935180664	0.050123922526836395	0.5223947167396545	-0.5248415470123291	-3.5804312229156494	-2.7666733264923096	-2.8962326049804688	-4.195713043212891	-5.235736846923828	-6.036689758300781	-7.7877197265625	-3.4016854763031006
ENSG00000142864.14	-0.468544602394104	-0.003319118171930313	0.6259822249412537	-0.8021821975708008	-1.1651219129562378	-1.2756892442703247	5.048088550567627	-0.8346723318099976	-3.5881993770599365	-3.31929087638855	-3.486727237701416	-4.3143391609191895	-5.530247688293457	-6.224362373352051	-7.55294942855835	-3.536592721939087
ENSG00000116717.11	-0.06910179555416107	-2.5193347930908203	1.888400673866272	0.5675081014633179	-0.3292325735092163	-1.2789400815963745	3.3699984550476074	0.6843129396438599	-2.933985471725464	-2.832939624786377	-2.8799777030944824	-3.1312010288238525	-5.495355606079102	-5.500908374786377	-6.383233070373535	-3.2122409343719482
ENSG00000172380.5	-0.010957587510347366	-0.6757055521011353	2.492614507675171	-1.7950059175491333	-1.7662187814712524	-0.35234424471855164	4.087440013885498	-1.4666908979415894	-3.1161017417907715	-3.237071990966797	-3.7754130363464355	-4.257622718811035	-5.979787826538086	-6.422368049621582	-7.131835460662842	-3.936946392059326
ENSG00000238778.1	0.15204541385173798	0.22839316725730896	0.6204264760017395	-0.26629483699798584	-1.6157559156417847	1.4007627964019775	0.9515498876571655	-1.4745296239852905	-2.4694483280181885	-2.052168130874634	-3.364901065826416	-4.320943355560303	-5.5522966384887695	-6.0062761306762695	-7.695417881011963	-4.319133281707764
ENSG00000162595.5	-0.8677730560302734	-1.1552776098251343	-0.06831259280443192	-0.249205082654953	2.053964376449585	-1.5867294073104858	3.259383201599121	0.6232696771621704	-2.6759142875671387	-2.712266445159912	-1.90091073513031	-3.538210153579712	-5.322487831115723	-5.036777496337891	-6.928516864776611	-2.6235132217407227
ENSG00000116729.13	-0.4723771810531616	0.562195897102356	2.0319771766662598	-0.844508171081543	-2.367539882659912	-0.6695091128349304	4.918992519378662	-1.0229014158248901	-3.5364322662353516	-3.609738826751709	-4.000627040863037	-4.775519847869873	-6.382390975952148	-6.790757656097412	-8.43552303314209	-3.9947402477264404
ENSG00000234383.1	0.09178026020526886	0.35903796553611755	-0.6861736178398132	-0.005059197545051575	-1.6074095964431763	0.8396804928779602	0.9912747740745544	-1.2040303945541382	-3.5259082317352295	-2.5638325214385986	-3.043053150177002	-4.8091721534729	-5.732902526855469	-5.665647029876709	-8.511682510375977	-3.2018911838531494
ENSG00000221203.1	-0.13865439593791962	0.7568912506103516	-0.3358045518398285	-0.09065163880586624	-1.1969308853149414	0.750442624092102	1.2826952934265137	-0.8075921535491943	-2.577270984649658	-3.4586546421051025	-3.175434112548828	-4.9783549308776855	-6.360651969909668	-5.756417751312256	-8.906758308410645	-4.015966415405273
ENSG00000116745.6	0.3468572795391083	0.16863687336444855	-0.09183355420827866	-1.549505352973938	-1.363452672958374	-0.19539764523506165	0.15232440829277039	-0.6890827417373657	-3.610480308532715	-3.043602228164673	-4.122474670410156	-5.095943450927734	-6.4492950439453125	-7.050843715667725	-9.17722225189209	-4.809067249298096
ENSG00000033122.18	-1.15662682056427	0.22814622521400452	-0.9974132180213928	-1.011812686920166	1.3465168476104736	0.252209335565567	6.761033535003662	0.04770669341087341	-3.540076732635498	-3.0757737159729004	-2.7926220893859863	-4.2327470779418945	-5.779361724853516	-6.417522430419922	-7.978659152984619	-3.5205914974212646
ENSG00000240692.3	-0.5049569606781006	0.4670998156070709	-0.20380574464797974	-0.213544100522995	-0.15103621780872345	2.5516765117645264	3.2940802574157715	-0.21891942620277405	-3.714571952819824	-2.5373682975769043	-2.91925048828125	-4.169826984405518	-5.273198127746582	-5.490012168884277	-8.2787504196167	-3.4277708530426025
ENSG00000229359.2	-0.8462378978729248	0.32512161135673523	-0.8213000893592834	0.5108855962753296	-0.24928437173366547	1.726883888244629	1.3991682529449463	-0.3146282732486725	-3.1675727367401123	-1.5160188674926758	-1.73274564743042	-2.2191097736358643	-4.322782516479492	-3.926095724105835	-6.157857418060303	-2.5310208797454834
ENSG00000237919.5	1.2957313060760498	0.3624561131000519	0.8790709972381592	-1.3522229194641113	-0.4678942561149597	0.861547589302063	1.2909345626831055	-0.6244173049926758	-3.402965784072876	-1.8676477670669556	-2.9226694107055664	-3.3172447681427	-5.358304023742676	-5.208927154541016	-7.32981538772583	-3.192993402481079
ENSG00000066557.5	0.14206959307193756	0.19429555535316467	-0.8064761757850647	-1.4444500207901	-0.1844833642244339	-0.690437376499176	4.129109859466553	0.19529184699058533	-3.6079680919647217	-3.2726473808288574	-3.1620254516601562	-4.264654159545898	-5.6618146896362305	-6.220451354980469	-7.816150665283203	-3.706449270248413
ENSG00000244389.3	-0.7037115097045898	-0.6624998450279236	-0.7347073554992676	-0.1553415209054947	-0.03329956531524658	0.05494748800992966	0.3597329556941986	-0.3207314908504486	-3.507965326309204	-2.441283702850342	-2.7980566024780273	-4.039008617401123	-5.554876327514648	-5.915134906768799	-8.64598560333252	-4.010114669799805
ENSG00000116754.13	-0.7230439186096191	-0.26066240668296814	-0.8775997757911682	-0.79509437084198	-1.3288519382476807	0.20972195267677307	4.941622257232666	0.33732137084007263	-3.912623167037964	-3.0727899074554443	-3.188136577606201	-4.428116321563721	-5.997269630432129	-6.442342758178711	-8.09717845916748	-3.6014771461486816
ENSG00000118454.12	-0.03937457874417305	-0.31510576605796814	-0.1837030053138733	-0.9410525560379028	-0.5810561180114746	-0.46839532256126404	4.305520057678223	0.42945680022239685	-3.903722047805786	-3.1893866062164307	-3.422330856323242	-4.260291576385498	-5.600245475769043	-6.436915874481201	-7.916383266448975	-3.573598861694336
ENSG00000197568.13	-1.4131484031677246	-0.4985879361629486	0.14282971620559692	0.22598281502723694	-0.7336803674697876	-0.7859662175178528	2.3458778858184814	-0.33888640999794006	-3.5072968006134033	-2.415893077850342	-3.3040637969970703	-3.910705089569092	-5.669528961181641	-5.777897357940674	-7.59451150894165	-3.499178886413574
ENSG00000116761.11	-0.6095104217529297	-0.4128919541835785	1.2358468770980835	-0.240414097905159	-0.60929936170578	0.22196665406227112	1.8484585285186768	-0.10762766003608704	-3.799595355987549	-2.790731191635132	-2.6639485359191895	-4.012465000152588	-5.484850883483887	-5.727463722229004	-7.517048358917236	-3.341458559036255
ENSG00000271992.1	-0.7851890325546265	-0.34691575169563293	0.21540817618370056	-0.1824907660484314	-0.3229683041572571	0.14296266436576843	0.46408167481422424	-0.6404432058334351	-3.420928478240967	-2.2077078819274902	-2.910073757171631	-4.085938453674316	-5.081618309020996	-5.485555648803711	-7.7691850662231445	-3.5027918815612793
ENSG00000132485.13	-1.0085934400558472	-0.27453121542930603	-0.6892665028572083	-1.403412103652954	-0.9613879323005676	-0.09858544915914536	5.111837863922119	-0.2268451750278473	-3.7389023303985596	-2.942809820175171	-3.0299577713012695	-4.218789577484131	-5.83411979675293	-6.050379276275635	-7.369161128997803	-3.532200336456299
ENSG00000207721.1	-2.7452762126922607	-0.3012486398220062	0.04451971501111984	-0.5027720928192139	-0.6310455799102783	1.124200701713562	3.5616722106933594	0.016943544149398804	-3.2182865142822266	-1.3387155532836914	-3.0499138832092285	-3.076549530029297	-4.250575065612793	-5.558908939361572	-6.754526615142822	-3.841703414916992
ENSG00000229956.10	-0.062350694090127945	0.1365823745727539	-0.2747684121131897	-0.7031069993972778	-0.6952909231185913	0.20114418864250183	0.398710161447525	-0.31899693608283997	-3.4270899295806885	-2.689342498779297	-3.2061619758605957	-4.087459087371826	-5.174954414367676	-5.622692584991455	-7.496549129486084	-3.6089673042297363
ENSG00000172260.14	-1.377729058265686	0.19396081566810608	-0.7058685421943665	-1.1124911308288574	1.3379257917404175	-1.1820718050003052	3.8248562812805176	-0.002500683069229126	-3.3094894886016846	-2.8750205039978027	-2.6557774543762207	-3.861680746078491	-5.082080841064453	-5.77907657623291	-7.600266456604004	-3.245565414428711
ENSG00000228853.1	-0.909164547920227	0.1895546019077301	-0.22483140230178833	-0.20385147631168365	-0.02735920250415802	0.5728521943092346	0.6511073708534241	-0.3528818190097809	-3.5164120197296143	-2.0978121757507324	-2.643001079559326	-3.140348196029663	-5.146909713745117	-5.637892246246338	-7.972402095794678	-3.6907541751861572
ENSG00000227207.2	-0.2177884876728058	0.5759084224700928	-0.4282603859901428	-0.08812160789966583	-0.11899565160274506	1.0998172760009766	0.5193096995353699	-0.21139702200889587	-2.8895881175994873	-1.728606939315796	-1.741852045059204	-3.2374446392059326	-4.779848098754883	-5.243833541870117	-6.362327575683594	-3.367433786392212
ENSG00000227016.3	-0.10154865682125092	-0.28034329414367676	-0.2665059268474579	-0.11744695156812668	0.22745820879936218	0.5578745603561401	0.2935168147087097	-0.016993016004562378	-3.4292778968811035	-2.310248374938965	-2.695547103881836	-3.538393259048462	-4.713064193725586	-4.944453239440918	-7.035418510437012	-3.155036211013794
ENSG00000162620.15	-0.19897356629371643	0.17374518513679504	-0.03266046196222305	-0.3807341158390045	-0.08269308507442474	-0.06727204471826553	0.19967445731163025	-0.30476224422454834	-3.345125913619995	-2.571338415145874	-3.19976806640625	-4.036282539367676	-5.032355308532715	-5.866764068603516	-7.216866970062256	-3.470590114593506
ENSG00000254685.6	-0.5916543006896973	0.010994341224431992	-0.04484707862138748	-1.3468948602676392	-1.078930139541626	-0.46450647711753845	2.2581615447998047	-0.05062094330787659	-3.26943039894104	-3.0190515518188477	-2.966646194458008	-3.912996530532837	-5.217314720153809	-5.700686931610107	-6.4558258056640625	-3.6070470809936523
ENSG00000259030.6	-0.22455419600009918	0.07399481534957886	-0.4071914553642273	-0.5654335021972656	-0.4265444874763489	0.3787625730037689	0.2613953948020935	-0.053160786628723145	-3.550875425338745	-2.652967929840088	-3.117550849914551	-3.9948019981384277	-5.119673728942871	-5.691397666931152	-7.6184892654418945	-3.558682918548584
ENSG00000116783.14	-0.3613205850124359	0.018980946391820908	-0.5752543210983276	-0.3788122832775116	-0.1570669561624527	0.1507352888584137	0.18577143549919128	-0.020650550723075867	-3.5511703491210938	-2.6977665424346924	-3.0236868858337402	-3.891110897064209	-5.024381637573242	-5.5926432609558105	-7.667834758758545	-3.53022837638855
ENSG00000233894.1	-0.3722395896911621	-0.14002583920955658	-0.3145049810409546	-0.698293924331665	-0.24590550363063812	0.41596633195877075	0.23956763744354248	-0.03917308151721954	-3.4071085453033447	-2.5501444339752197	-3.2360525131225586	-3.9506027698516846	-5.300915718078613	-5.760492324829102	-7.702610969543457	-3.828707695007324
ENSG00000178965.13	-2.070621967315674	0.1014033854007721	-0.3882121443748474	-0.265383780002594	1.875200867652893	-0.6878735423088074	4.348996639251709	0.2538622319698334	-3.270794153213501	-2.765474319458008	-2.560286521911621	-3.733307123184204	-4.975554466247559	-5.6986284255981445	-7.355220317840576	-3.131476640701294
ENSG00000272864.1	-1.4103171825408936	-0.2445392906665802	0.8806934356689453	-0.40001899003982544	-0.4824044108390808	0.21523907780647278	0.7435266375541687	-0.48301300406455994	-3.350813865661621	-2.3409669399261475	-3.015366554260254	-3.50301456451416	-4.600118637084961	-5.370317459106445	-7.1683197021484375	-3.731602668762207
ENSG00000116791.13	-1.3493257761001587	-0.6578646898269653	0.8510225415229797	-0.6720585823059082	-0.8139801621437073	-0.5014743208885193	2.0799496173858643	-1.3322796821594238	-3.585407018661499	-3.2178101539611816	-3.419854164123535	-4.501803874969482	-5.25661563873291	-6.174007892608643	-7.802821159362793	-3.852276086807251
ENSG00000162623.15	-1.1037808656692505	-0.6583558320999146	0.3690430521965027	-0.5560280084609985	-0.12669946253299713	-1.223248839378357	3.3127734661102295	-0.31413498520851135	-2.989907741546631	-2.7338175773620605	-3.0229291915893555	-3.709787368774414	-4.599209785461426	-5.509401321411133	-6.418450355529785	-3.276742935180664
ENSG00000261213.1	0.0371636264026165	-0.09041807055473328	-0.5536088347434998	-0.9468417167663574	0.920880138874054	0.17781341075897217	0.857191801071167	-0.12150880694389343	-3.3136723041534424	-2.8472180366516113	-2.764296531677246	-4.297132968902588	-4.769700050354004	-5.756673812866211	-6.951076984405518	-3.4824059009552
ENSG00000224127.1	0.008971583098173141	0.16193893551826477	-1.1714895963668823	-0.5830243825912476	1.2210087776184082	-0.25580430030822754	1.4320878982543945	0.026721805334091187	-3.4910192489624023	-3.177199363708496	-2.855680465698242	-4.865504264831543	-5.113536834716797	-5.580620765686035	-8.094802856445312	-3.370483875274658
ENSG00000162624.14	-0.0936267226934433	0.23102977871894836	-0.6946980357170105	-0.7545328140258789	1.2411428689956665	-0.13956686854362488	1.3505074977874756	0.28388866782188416	-3.3656272888183594	-3.0422263145446777	-2.7009243965148926	-4.3415913581848145	-4.589430809020996	-5.583876132965088	-7.4800944328308105	-3.2260608673095703
ENSG00000224149.1	0.14057309925556183	0.3720382750034332	-0.8014209866523743	-0.2583218216896057	1.09861159324646	-0.17848360538482666	0.9755175709724426	0.14932605624198914	-3.1239848136901855	-2.7248358726501465	-2.7255239486694336	-4.137053966522217	-4.688299179077148	-5.2820234298706055	-6.795165061950684	-3.178260326385498
ENSG00000137968.16	-0.053043145686388016	0.2839556634426117	-0.2291007936000824	-0.5613741874694824	-0.22161705791950226	0.21264493465423584	0.7848809361457825	-0.3134656250476837	-3.797039747238159	-2.9631385803222656	-3.3671154975891113	-4.556252956390381	-5.4220170974731445	-6.331568241119385	-7.884015083312988	-3.733055353164673
ENSG00000252338.1	-0.39361321926116943	0.4258289039134979	-0.0033470764756202698	-0.31408292055130005	-0.09714992344379425	0.7122275233268738	0.3521246016025543	-0.2165338546037674	-3.1755871772766113	-2.4006781578063965	-2.564568519592285	-3.5844593048095703	-5.644259452819824	-6.730059623718262	-8.777320861816406	-3.95591139793396
ENSG00000178193.5	-0.1502724587917328	-0.21426892280578613	-0.20291247963905334	-0.2383360117673874	0.1003640666604042	0.25953540205955505	0.267764151096344	-0.4190472364425659	-3.2463796138763428	-2.183317184448242	-2.4756174087524414	-3.9256553649902344	-4.126072883605957	-4.965495586395264	-6.743424415588379	-3.0400044918060303
ENSG00000117054.13	0.3167639970779419	-0.1424597203731537	0.0946466252207756	-1.2191929817199707	-0.574664294719696	-0.5110577940940857	4.710893154144287	-0.6604269742965698	-3.546199083328247	-3.2382705211639404	-3.170827865600586	-4.349826812744141	-5.637346267700195	-6.125008583068848	-7.978738307952881	-3.6941511631011963
ENSG00000137955.15	-0.26078200340270996	-0.8929175138473511	-0.12036938220262527	-1.3889931440353394	-0.7750551104545593	-0.6096836924552917	3.7690415382385254	0.16113576292991638	-3.730431318283081	-3.3217720985412598	-3.237938404083252	-4.586124420166016	-5.813870429992676	-6.584504127502441	-8.15301513671875	-3.597818374633789
ENSG00000057468.6	-1.3362479209899902	-0.4433620870113373	0.028895191848278046	-0.2258026897907257	-0.1255294382572174	0.5861889719963074	0.9784999489784241	-0.408195823431015	-3.6831793785095215	-2.4214773178100586	-2.572646141052246	-3.9838171005249023	-4.985551834106445	-5.261259078979492	-7.399532794952393	-2.771934986114502
ENSG00000184005.10	-0.8237962126731873	0.3193289339542389	-0.17167747020721436	-1.0310906171798706	-1.4450221061706543	-0.9631410241127014	1.9207922220230103	-0.04025736451148987	-3.5736236572265625	-3.1877152919769287	-3.4751768112182617	-4.008619785308838	-5.160350799560547	-5.917777061462402	-7.3031158447265625	-3.795318841934204
ENSG00000272855.1	-0.400030255317688	0.19153380393981934	0.1286405324935913	-0.6980334520339966	0.015671178698539734	0.3100058138370514	0.4757706820964813	-0.3775807023048401	-3.5744693279266357	-2.638258457183838	-3.3189215660095215	-3.7647864818573	-4.596619129180908	-5.788723468780518	-6.841873645782471	-3.7505815029144287
ENSG00000226415.1	-0.05643593147397041	-0.1438210904598236	0.15829819440841675	0.13842424750328064	0.7748766541481018	-1.7730213403701782	3.9731855392456055	0.42391738295555115	-3.3958919048309326	-3.3215513229370117	-3.0481138229370117	-3.7534289360046387	-4.871570587158203	-5.718254566192627	-6.604953289031982	-3.160288095474243
ENSG00000117069.14	-1.014250636100769	-0.3269585072994232	0.37679773569107056	-0.3779118061065674	1.7558869123458862	-0.19642147421836853	2.934800148010254	-0.3284884989261627	-3.8923463821411133	-3.204374313354492	-3.1179285049438477	-4.598936080932617	-5.840388298034668	-6.805037975311279	-8.375094413757324	-3.8477675914764404
ENSG00000276081.1	-0.31795555353164673	-0.06860581040382385	-0.20741641521453857	-1.2303829193115234	0.4555833339691162	2.188638925552368	1.1936949491500854	-0.8795479536056519	-4.8728346824646	-3.0910236835479736	-3.1088027954101562	-3.8831870555877686	-6.535700798034668	-7.198644638061523	-9.669801712036133	-3.750077486038208
ENSG00000230498.1	-0.4695460796356201	-1.1266933679580688	0.35173267126083374	-0.23163457214832306	0.8184171319007874	0.7758374810218811	2.764963388442993	-0.5735824108123779	-3.6878249645233154	-2.307039260864258	-2.657712936401367	-3.8768739700317383	-4.9898529052734375	-6.095038414001465	-7.6319403648376465	-2.7916908264160156
ENSG00000142892.14	-0.9335838556289673	0.759964108467102	-0.2040124535560608	-1.3134396076202393	-0.36214762926101685	-1.6221109628677368	3.4929299354553223	0.36291393637657166	-3.876931667327881	-3.5433707237243652	-3.4854178428649902	-4.515020847320557	-5.595095634460449	-6.632996559143066	-7.956103801727295	-3.941000461578369
ENSG00000226084.5	0.1346355825662613	-2.771519899368286	-0.8198891282081604	-1.0452766418457031	-0.6194648146629333	-2.2152695655822754	6.626086235046387	-0.20298853516578674	-3.7658774852752686	-3.0718886852264404	-3.0906314849853516	-4.242699146270752	-5.58962345123291	-6.5160627365112305	-8.863197326660156	-2.803043842315674
ENSG00000154027.18	-1.9047335386276245	-0.20968422293663025	-0.948996365070343	-0.15552613139152527	-0.34348100423812866	-2.0915207862854004	5.145895481109619	0.7563115358352661	-3.4375665187835693	-3.139806032180786	-3.013695240020752	-4.3193254470825195	-5.388328552246094	-6.252261638641357	-7.857029438018799	-3.4567320346832275
ENSG00000251767.1	-2.3675074577331543	-0.4636307656764984	-1.553634524345398	-1.5707634687423706	-2.226184606552124	2.0694894790649414	3.040667772293091	-1.3362218141555786	-3.6629960536956787	-1.8210537433624268	-2.53682279586792	-4.1540679931640625	-5.261746406555176	-5.788392066955566	-7.7707953453063965	-2.839780330657959
ENSG00000036549.12	-0.39775896072387695	-0.3940070569515228	-0.2951236367225647	-0.9974929094314575	-1.4503674507141113	-0.37996193766593933	3.9478578567504883	-0.07666411995887756	-3.720363140106201	-3.015429735183716	-3.2817978858947754	-4.2649712562561035	-5.328324317932129	-6.046690940856934	-7.527146339416504	-3.4129507541656494
ENSG00000077254.14	-0.2619974613189697	0.2359549105167389	-0.397561252117157	-0.8891762495040894	-0.3216785192489624	-0.994171679019928	5.338783264160156	0.03642663359642029	-3.565617799758911	-3.250778913497925	-3.173680305480957	-4.099488735198975	-5.318306922912598	-5.9826979637146	-7.421590805053711	-3.5529472827911377
ENSG00000180488.14	-0.7106075286865234	0.4716106951236725	-1.0861390829086304	-1.540418267250061	-0.5452691912651062	-1.4127641916275024	4.385655879974365	0.23026403784751892	-3.7217257022857666	-3.278502941131592	-3.3000245094299316	-4.365442752838135	-5.5839338302612305	-6.362542629241943	-7.628501892089844	-3.7549452781677246
ENSG00000219201.4	-0.8320803642272949	-1.0830796957015991	0.8987968564033508	-0.31076839566230774	-0.6852388381958008	-0.7990343570709229	3.321396827697754	-0.4463297426700592	-3.9558732509613037	-2.9439287185668945	-3.655832290649414	-4.038694858551025	-5.481315612792969	-6.586331367492676	-8.118008613586426	-3.362912893295288
ENSG00000235613.2	-0.15716689825057983	0.18328174948692322	-0.29323428869247437	0.2814471423625946	-1.304296851158142	1.276458501815796	0.8767731785774231	-0.06644830107688904	-2.9220941066741943	-2.1794960498809814	-2.7333850860595703	-3.4305973052978516	-4.640888214111328	-4.776421070098877	-7.2323713302612305	-3.0094985961914062
ENSG00000232015.2	-1.9001141786575317	0.06226840242743492	-0.48374834656715393	-0.2366790622472763	-0.7965223789215088	1.1741483211517334	1.5258604288101196	-0.3920663893222809	-3.9115355014801025	-2.2620773315429688	-2.412963390350342	-4.101607322692871	-4.994889259338379	-5.64767599105835	-7.446602821350098	-3.966390609741211
ENSG00000235927.4	0.1930638998746872	0.06140732392668724	-0.68280428647995	-0.15741366147994995	0.2243533432483673	0.27834251523017883	0.43261784315109253	-0.07987192273139954	-3.2908902168273926	-2.604254722595215	-2.814535617828369	-3.93929123878479	-5.159135818481445	-5.350225925445557	-7.9181108474731445	-3.4337708950042725
ENSG00000162614.18	-0.7115703821182251	-0.0034997202455997467	0.11030786484479904	-0.2751868963241577	0.5554680228233337	0.024811960756778717	1.3837695121765137	-0.3963187038898468	-3.4675581455230713	-2.9274845123291016	-3.0678176879882812	-4.276223182678223	-5.3951215744018555	-5.907474517822266	-8.254507064819336	-3.5576229095458984
ENSG00000162613.16	-1.6167868375778198	-0.5722826719284058	0.38898223638534546	-0.19284257292747498	-1.420715093612671	-0.40368327498435974	4.567792892456055	-0.1435791552066803	-3.973107099533081	-3.3218584060668945	-3.560758113861084	-4.663597583770752	-6.008130073547363	-6.504421710968018	-7.810052871704102	-3.788435220718384
ENSG00000162616.8	-2.460313320159912	-1.0036972761154175	1.148276686668396	-0.6639785766601562	-0.2884977459907532	-1.5574873685836792	5.215616226196289	-1.8125962018966675	-3.5722131729125977	-3.483659267425537	-3.0627617835998535	-4.4783525466918945	-5.067960739135742	-6.218724250793457	-8.1520357131958	-3.563462257385254
ENSG00000137960.5	-0.0182180292904377	-0.41937199234962463	0.2214994728565216	-0.3850419223308563	0.3886949419975281	-0.02755921334028244	0.5608074069023132	-0.18693500757217407	-3.680112361907959	-2.876645803451538	-2.999532699584961	-4.11693811416626	-5.12310791015625	-5.831632137298584	-7.626994609832764	-3.2685184478759766
ENSG00000273338.1	-0.15442173182964325	-0.17599108815193176	-0.6910187602043152	-0.22570939362049103	-0.5378257036209106	-1.4105409383773804	0.30538102984428406	-0.4089016318321228	-3.3385045528411865	-1.9536198377609253	-2.907711982727051	-4.022012233734131	-5.096334457397461	-5.977454662322998	-6.840889930725098	-3.7041172981262207
ENSG00000122420.9	-0.14890798926353455	0.41741636395454407	0.0009579285979270935	-0.2299278825521469	0.06058761477470398	-0.11453733593225479	0.2042037844657898	-0.258797824382782	-3.669987678527832	-2.975743293762207	-3.2245779037475586	-4.145319938659668	-5.200471878051758	-6.108644485473633	-7.7544050216674805	-3.4171388149261475
ENSG00000137959.15	1.1399770975112915	1.2304775714874268	0.03150557726621628	-0.9369966983795166	-1.5005947351455688	-0.7799990177154541	2.0904300212860107	-0.43589165806770325	-3.021639823913574	-3.6407265663146973	-3.5843119621276855	-4.6721343994140625	-6.253332138061523	-6.346762180328369	-7.62186861038208	-3.6129133701324463
ENSG00000137965.10	1.2730449438095093	0.1958242952823639	0.2027708888053894	-0.55509352684021	-1.627158522605896	-0.2778228223323822	2.869361400604248	0.33524665236473083	-3.617954969406128	-3.648547649383545	-3.6059231758117676	-4.826736927032471	-6.502341270446777	-6.736783027648926	-8.060391426086426	-3.799079418182373
ENSG00000238015.2	0.09668508172035217	0.5470663905143738	0.12549558281898499	-0.3757927119731903	-0.3204187750816345	0.045042507350444794	0.3156328499317169	0.0642177164554596	-3.1031463146209717	-2.3641538619995117	-2.5709493160247803	-3.720503330230713	-4.568821430206299	-4.906822204589844	-6.69079065322876	-3.0069503784179688
ENSG00000162618.12	0.4655277729034424	-0.3865828216075897	2.6206676959991455	0.15327125787734985	-1.1613826751708984	0.7166221737861633	2.2258167266845703	0.5362956523895264	-3.5934178829193115	-3.4164390563964844	-3.540018081665039	-4.947180271148682	-5.728977203369141	-6.407005310058594	-7.835277080535889	-3.9159321784973145
ENSG00000117114.19	-1.198859453201294	-0.2740093171596527	1.3144944906234741	0.06476691365242004	0.8910247087478638	0.22849765419960022	4.057213306427002	0.3279477059841156	-3.9192817211151123	-3.5128633975982666	-3.284165859222412	-4.596317768096924	-5.996599197387695	-6.288083076477051	-8.314176559448242	-3.9031360149383545
ENSG00000227960.1	-0.1379578709602356	0.14153382182121277	-0.09883306175470352	-0.41311195492744446	-0.00043811649084091187	0.7911698818206787	0.2704422175884247	-0.6174182891845703	-3.09401273727417	-1.9817557334899902	-2.2812459468841553	-3.043189525604248	-4.4626851081848145	-4.760673999786377	-7.182126045227051	-3.099976062774658
ENSG00000233008.5	-0.47745680809020996	-0.2161954939365387	-0.4334239959716797	-0.27693718671798706	-0.0009244680404663086	0.840027928352356	0.5808985233306885	-0.006517231464385986	-3.4140396118164062	-2.5243167877197266	-2.756882667541504	-3.577972650527954	-5.04234504699707	-5.062258720397949	-7.571620941162109	-3.323035717010498
ENSG00000137941.16	-0.8538597822189331	0.12371411919593811	-1.9586893320083618	-1.4112926721572876	-2.577441930770874	-0.9056215882301331	5.6155877113342285	0.4924193322658539	-3.948531150817871	-2.912724733352661	-3.731985092163086	-4.385202884674072	-5.7997894287109375	-6.456265449523926	-8.128386497497559	-3.6542370319366455
ENSG00000233061.1	-0.3191084861755371	0.48251965641975403	-2.844954252243042	-0.799757719039917	-3.060020685195923	1.2988873720169067	2.380373477935791	0.3786252439022064	-3.285573720932007	-1.6155574321746826	-2.8063669204711914	-3.79179048538208	-5.481901168823242	-6.281055927276611	-8.255563735961914	-3.216670274734497
ENSG00000271576.1	-0.4069690704345703	-0.06727573275566101	-0.922489583492279	-0.5597743988037109	-0.5683071613311768	0.10139439254999161	0.9615429043769836	0.8044781684875488	-3.785719633102417	-2.6562464237213135	-3.207158088684082	-3.9192769527435303	-5.694927215576172	-5.782022476196289	-8.29948902130127	-3.8143668174743652
ENSG00000142875.19	-1.1918317079544067	0.046416427940130234	-1.170568585395813	-1.3783172369003296	-0.0021411925554275513	-2.2214198112487793	7.557081699371338	-0.27977314591407776	-3.6409480571746826	-3.2807252407073975	-2.999861717224121	-4.1193342208862305	-5.3485260009765625	-6.161471843719482	-7.363903522491455	-3.4951345920562744
ENSG00000213540.3	-0.49655240774154663	0.3788130581378937	-1.1396669149398804	-0.1175101101398468	-2.1730732917785645	0.9796294569969177	1.7256113290786743	-0.0745331346988678	-3.9413578510284424	-2.5119481086730957	-3.455982208251953	-4.271920680999756	-5.943864822387695	-6.285210132598877	-8.651517868041992	-3.7715609073638916
ENSG00000226970.2	-0.684096097946167	0.3590843975543976	-0.2734965980052948	0.2515866160392761	0.3716498017311096	0.19834935665130615	0.6017809510231018	-0.2650285065174103	-2.833810806274414	-1.9801803827285767	-2.2740225791931152	-3.8026790618896484	-4.427712440490723	-5.2049560546875	-7.305179119110107	-3.187432050704956
ENSG00000203943.8	-0.331373006105423	-0.08225706219673157	-0.9154500365257263	-0.8786998987197876	-0.060663238167762756	-0.2353897988796234	0.7897768616676331	-0.23281165957450867	-3.4452927112579346	-2.6049082279205322	-2.6727499961853027	-3.8813018798828125	-4.888627052307129	-5.573754787445068	-7.298003196716309	-3.2696316242218018
ENSG00000249237.5	-0.43009284138679504	0.325016051530838	-0.6270964741706848	-0.36487555503845215	-0.2983049154281616	0.2792298197746277	0.23877710103988647	-0.0828622579574585	-3.1987016201019287	-2.5412802696228027	-2.980088710784912	-4.197909355163574	-4.97557258605957	-5.391576290130615	-7.161840915679932	-3.5238730907440186
ENSG00000240520.5	0.3444473147392273	0.5963656902313232	-0.7845246195793152	-1.2002480030059814	1.3750509023666382	-1.2405701875686646	0.9850189089775085	-1.5369127988815308	-3.9550769329071045	-3.467745780944824	-2.7017087936401367	-4.346473217010498	-5.848697662353516	-6.910890102386475	-8.851204872131348	-3.265359878540039
ENSG00000137976.7	-0.5009211301803589	0.09069004654884338	-0.18048053979873657	-0.14604319632053375	0.1332220435142517	-0.12338884174823761	0.233528733253479	-0.46137094497680664	-3.877547025680542	-2.9572832584381104	-3.3828916549682617	-4.527553081512451	-5.3722381591796875	-6.045519828796387	-7.895725250244141	-3.831528902053833
ENSG00000117133.10	-0.8947299718856812	-0.7547911405563354	-0.5621911883354187	-0.5627186298370361	0.735500693321228	-2.181166887283325	4.573666095733643	-0.6844438314437866	-3.50881290435791	-3.304584503173828	-3.152650833129883	-4.0800299644470215	-5.413220405578613	-6.431098461151123	-7.993979454040527	-3.298675298690796
ENSG00000174021.10	-0.26764166355133057	-0.7588495016098022	0.7654981017112732	0.23403850197792053	-0.7476057410240173	-1.3897794485092163	4.225412845611572	-1.6223913431167603	-3.7559001445770264	-3.3591203689575195	-3.547085762023926	-4.375730037689209	-5.659516334533691	-6.610709190368652	-8.073845863342285	-3.604748249053955
ENSG00000122432.16	0.38686758279800415	-0.28059032559394836	0.033780209720134735	-0.46008118987083435	0.31507551670074463	0.23741507530212402	0.9074925184249878	-0.29583296179771423	-3.560976982116699	-2.553938865661621	-2.7564148902893066	-4.074191570281982	-5.012104034423828	-5.632852077484131	-7.5705246925354	-2.9783475399017334
ENSG00000117151.12	-0.34116166830062866	-0.6733827590942383	0.5252963900566101	-1.073357343673706	-0.7803734540939331	0.04901651293039322	1.968846321105957	0.4971073567867279	-4.102292537689209	-2.9892289638519287	-3.5411376953125	-4.362054824829102	-5.992271423339844	-6.643641471862793	-8.147883415222168	-3.746786117553711
ENSG00000117155.16	-0.7823129892349243	-0.07616981863975525	-0.43720167875289917	-1.4044086933135986	1.8070133924484253	-0.9830636382102966	5.517809867858887	0.15047749876976013	-3.3212637901306152	-3.1216282844543457	-2.6352615356445312	-3.7890496253967285	-5.181946754455566	-5.897869110107422	-7.351104259490967	-3.3487205505371094
ENSG00000171517.5	-0.5401301980018616	-0.15711815655231476	0.7586659789085388	-0.9863282442092896	-1.040548324584961	0.08999047428369522	0.34139159321784973	-1.5054430961608887	-4.400234222412109	-3.635878324508667	-3.6688241958618164	-5.053842544555664	-6.935140609741211	-7.138070583343506	-9.559160232543945	-4.373068809509277
ENSG00000162643.12	-0.5403473377227783	-0.26942339539527893	0.6205897927284241	-1.3164879083633423	-1.6104400157928467	0.4598275125026703	0.37296104431152344	-2.7586047649383545	-4.081071376800537	-3.153484344482422	-3.962855815887451	-5.470412731170654	-6.845698356628418	-7.153410911560059	-10.278429985046387	-4.640491962432861
ENSG00000055732.12	-0.4175845980644226	-0.2758401930332184	-0.323016881942749	-0.10351996123790741	0.3941537141799927	0.2901172935962677	0.34923553466796875	0.22085127234458923	-3.0193188190460205	-2.3544206619262695	-2.6849985122680664	-3.91310715675354	-4.913278579711914	-5.262571811676025	-7.505978584289551	-3.2757160663604736
ENSG00000266110.1	-0.3084191083908081	0.3864698112010956	-0.2958987355232239	-1.1391788721084595	-1.155442237854004	0.7142687439918518	-0.06093452125787735	-1.6280938386917114	-4.375014305114746	-3.405121326446533	-3.9366774559020996	-5.3547682762146	-7.074470520019531	-6.181975364685059	-10.784477233886719	-3.7361807823181152
ENSG00000280099.1	-0.49763792753219604	0.21573412418365479	0.5189908146858215	-0.5461572408676147	-0.006511405110359192	0.40169617533683777	0.7076048851013184	-0.5895376205444336	-3.9592649936676025	-3.0599751472473145	-3.3822522163391113	-4.452112197875977	-5.3386640548706055	-6.008123397827148	-8.096957206726074	-3.746962547302246
ENSG00000097096.8	-0.15753231942653656	0.12397196888923645	0.415591299533844	-0.723994255065918	0.10108138620853424	0.38958391547203064	1.6061815023422241	-0.5133004188537598	-3.5202476978302	-2.726412296295166	-3.040477752685547	-4.0226616859436035	-5.157112121582031	-5.7303900718688965	-7.242032051086426	-3.366288661956787
ENSG00000162642.13	-0.6241928339004517	-0.6335502862930298	-0.2911263108253479	-0.49704912304878235	0.009763702750205994	-1.172027587890625	3.698698043823242	-0.21885815262794495	-3.9761736392974854	-3.2613213062286377	-3.313044548034668	-4.598499774932861	-5.991571426391602	-6.641822814941406	-8.515707969665527	-3.7605531215667725
ENSG00000142867.12	-0.39628463983535767	-0.5026003122329712	1.051080584526062	-0.24161070585250854	-0.6175329089164734	-0.3740480840206146	2.240893840789795	-0.2989480793476105	-3.935640335083008	-3.3236348628997803	-3.381869316101074	-4.882501125335693	-5.870989799499512	-6.7529754638671875	-8.439457893371582	-4.161233901977539
ENSG00000153904.18	1.1201568841934204	-0.20028766989707947	2.597489356994629	-1.271178960800171	-1.396144986152649	-0.1641462743282318	6.922911167144775	-2.0834150314331055	-3.499699592590332	-3.303480625152588	-3.8026461601257324	-4.3085150718688965	-5.879220008850098	-5.893252849578857	-6.777691841125488	-3.6961288452148438
ENSG00000199459.1	0.6683450937271118	-0.6838492155075073	-0.28890812397003174	-0.7641665935516357	-2.219102382659912	1.9816888570785522	1.5394011735916138	-1.8541735410690308	-3.692997694015503	-1.933526635169983	-3.109804630279541	-4.8939385414123535	-4.396765232086182	-4.938223838806152	-7.779487133026123	-3.22422456741333
ENSG00000273264.1	1.0730761289596558	-0.14059332013130188	0.1680309772491455	-0.8522341251373291	-0.140650674700737	0.14688438177108765	0.4844469130039215	-0.35916540026664734	-3.5737359523773193	-2.263631820678711	-3.3045663833618164	-3.882873773574829	-5.507845878601074	-5.6541218757629395	-8.164664268493652	-3.3277342319488525
ENSG00000282057.1	0.30361342430114746	0.04617249593138695	0.07552770525217056	-0.4628336727619171	-0.578206479549408	0.3572184145450592	0.42337504029273987	-0.529999315738678	-3.7278003692626953	-2.650721311569214	-3.328256607055664	-4.065433979034424	-5.321958541870117	-5.99232292175293	-8.337157249450684	-3.6566379070281982
ENSG00000142871.16	-0.3328281044960022	-0.43354877829551697	2.8635072708129883	0.06201566755771637	-3.1621105670928955	0.04335609823465347	2.429962158203125	-2.575033187866211	-4.163740634918213	-2.890801191329956	-4.060878753662109	-6.4880194664001465	-6.645586013793945	-7.634115695953369	-9.912644386291504	-5.3674492835998535
ENSG00000117174.10	-0.6337957382202148	-0.005875203758478165	0.22189944982528687	-0.8097711801528931	-1.0333257913589478	-0.7100616097450256	3.2075576782226562	-0.48512306809425354	-3.510464906692505	-2.8385324478149414	-3.5536069869995117	-4.246554851531982	-5.310953140258789	-6.107527732849121	-7.423916339874268	-3.583109140396118
ENSG00000171502.14	0.3917734622955322	-0.6075022220611572	-0.15263628959655762	0.07449857890605927	-0.12702009081840515	1.1156567335128784	1.8553245067596436	-0.32188692688941956	-3.336554765701294	-3.0274300575256348	-2.6965885162353516	-3.7351598739624023	-4.970648765563965	-5.4042067527771	-7.352579593658447	-3.322377920150757
ENSG00000122417.15	-0.5126941204071045	0.06549587845802307	-0.3621681332588196	-1.2173134088516235	-0.4400622248649597	0.9805852770805359	3.028456211090088	-0.19006362557411194	-4.158857822418213	-3.2395312786102295	-3.419894218444824	-4.578792095184326	-6.049274444580078	-6.823315620422363	-8.420016288757324	-3.848161220550537
ENSG00000137975.7	-0.4156336784362793	0.2344205230474472	-0.5855896472930908	-0.39291152358055115	-0.29732000827789307	-0.3489425480365753	0.029438532888889313	-0.12856116890907288	-3.255143404006958	-2.639099597930908	-2.92954158782959	-3.973479986190796	-4.876230239868164	-5.249042987823486	-6.976257801055908	-3.630086898803711
ENSG00000016602.9	-0.7736084461212158	0.438441663980484	-2.0436038970947266	-1.0607340335845947	-2.003831148147583	-1.1348234415054321	1.6980981826782227	0.09177598357200623	-2.688901901245117	-2.2519466876983643	-3.156282901763916	-4.041347980499268	-4.792875289916992	-5.478315353393555	-7.126425743103027	-3.8441483974456787
ENSG00000236915.1	-0.2734505832195282	0.08247324824333191	-0.4461299777030945	-0.3709667921066284	-0.1740449219942093	0.4967583119869232	0.3737858235836029	-0.0619388222694397	-3.8228795528411865	-2.5222737789154053	-2.947701930999756	-3.930567979812622	-5.224889755249023	-6.215051651000977	-8.317599296569824	-3.767472982406616
ENSG00000261737.1	0.11262370645999908	-0.3642166554927826	-0.7147868275642395	-0.46819135546684265	0.07360251247882843	-0.17266741394996643	1.2705671787261963	-0.2967233955860138	-4.280346393585205	-3.118382215499878	-3.475449562072754	-4.933068752288818	-5.923834800720215	-6.747225761413574	-8.895782470703125	-3.8508706092834473
ENSG00000097033.14	0.009818565100431442	-0.24867185950279236	1.0952082872390747	-1.1235769987106323	-1.384102702140808	-0.3953772485256195	4.972679138183594	-0.1958388388156891	-3.8578975200653076	-3.3265559673309326	-3.610595703125	-4.3628411293029785	-5.909676551818848	-6.42030143737793	-7.682061195373535	-3.830578565597534
ENSG00000183291.15	0.06729234755039215	-0.9114898443222046	0.048823051154613495	-1.3071763515472412	-1.4204976558685303	-1.773549199104309	5.647242069244385	-0.29084721207618713	-3.7847588062286377	-3.3619048595428467	-3.340433120727539	-4.2433977127075195	-5.97269344329834	-6.443110466003418	-8.09627914428711	-3.532893180847168
ENSG00000153936.16	0.5177668333053589	-0.2379525601863861	1.7060259580612183	-1.4013680219650269	0.2614935636520386	0.15923407673835754	4.5547895431518555	0.10277494788169861	-3.769277811050415	-3.3829500675201416	-3.2031164169311523	-4.186354637145996	-5.525622367858887	-6.082476615905762	-7.345150470733643	-3.5824673175811768
ENSG00000225568.1	-0.5248537659645081	-0.046068523079156876	0.39938801527023315	0.294784277677536	-0.2685971260070801	0.7375223636627197	1.1142041683197021	0.0397438108921051	-2.7474403381347656	-1.8703608512878418	-2.230849266052246	-2.9935874938964844	-4.146453857421875	-4.293111801147461	-6.281902313232422	-3.105313301086426
ENSG00000267272.5	-0.17563842236995697	-0.22904452681541443	-0.4711757004261017	-0.1863200068473816	0.8696117997169495	-0.3159961402416229	0.8456677794456482	0.14724168181419373	-3.2278120517730713	-2.583547830581665	-2.8636622428894043	-3.8639414310455322	-4.687769889831543	-5.407149791717529	-7.20814847946167	-3.168566942214966
ENSG00000143013.12	0.09891380369663239	-0.2323192059993744	0.05786924809217453	-0.5607402324676514	0.06709842383861542	-1.2727910280227661	4.255506992340088	-0.8151477575302124	-3.7154018878936768	-3.338174819946289	-3.302755355834961	-4.574276924133301	-5.951752662658691	-6.547414779663086	-8.309435844421387	-3.8629417419433594
ENSG00000237505.6	-0.01811656728386879	-0.3984362781047821	-0.006064601242542267	-0.38660523295402527	-0.031975775957107544	0.1828957200050354	0.5438883304595947	-0.03118312358856201	-3.5316708087921143	-2.7159922122955322	-3.021820545196533	-3.9511899948120117	-4.935641288757324	-5.834085941314697	-7.670602321624756	-3.3561453819274902
ENSG00000065243.19	-0.20579038560390472	-0.3382910192012787	0.03192596882581711	-0.9790582656860352	-1.6522661447525024	0.014583982527256012	4.056375980377197	-0.3139015734195709	-3.8655991554260254	-3.3114540576934814	-3.5970897674560547	-4.643896102905273	-5.930431365966797	-6.398778915405273	-8.315908432006836	-3.7947046756744385
ENSG00000207234.1	-1.3389506340026855	0.47444453835487366	-0.8360037803649902	-0.3592897951602936	-1.766534447669983	2.126239776611328	2.918429374694824	-1.1265820264816284	-3.284470796585083	-1.9344375133514404	-2.782987117767334	-4.673889636993408	-6.00291633605957	-5.7294816970825195	-8.466708183288574	-3.7766313552856445
ENSG00000241975.1	-0.31063222885131836	-0.3029650151729584	-0.7988389730453491	-0.7491044998168945	-0.9546566605567932	1.1500446796417236	2.0450246334075928	0.5887634754180908	-3.388315439224243	-2.8810577392578125	-3.479992389678955	-4.2387261390686035	-5.453871726989746	-6.261408805847168	-8.475870132446289	-3.8124265670776367
ENSG00000137947.11	-0.3851022720336914	-0.585534930229187	-0.3037816882133484	-0.733283281326294	-0.0776800662279129	-1.671951174736023	3.8237037658691406	-0.057725101709365845	-3.2732107639312744	-3.1982340812683105	-2.988675594329834	-4.051527976989746	-5.453710556030273	-6.153543472290039	-7.536594867706299	-3.166386365890503
ENSG00000137944.16	0.8673926591873169	0.2073318064212799	-0.36362868547439575	-1.454063057899475	-0.2490542083978653	-0.4418366849422455	3.802901268005371	1.1574910879135132	-3.471919059753418	-2.8054327964782715	-3.091477870941162	-3.5410733222961426	-5.003820419311523	-5.802490234375	-7.060246467590332	-3.1910059452056885
ENSG00000213516.9	0.25993359088897705	-0.23836073279380798	0.34684449434280396	-0.8859803676605225	-1.4905850887298584	-0.5034502148628235	3.6161108016967773	-0.14046898484230042	-3.798745632171631	-3.329932928085327	-3.567063808441162	-4.525419235229492	-6.002908706665039	-6.1617889404296875	-7.803563117980957	-3.4339890480041504
ENSG00000117226.11	-0.7779033184051514	-1.333107590675354	1.5858663320541382	-0.3689177930355072	-1.4213863611221313	-0.7038994431495667	1.3511378765106201	-0.508179783821106	-2.7072973251342773	-3.0197906494140625	-4.1220784187316895	-4.460787296295166	-5.6479082107543945	-5.335858345031738	-6.929423809051514	-4.039287090301514
ENSG00000117228.9	-0.9507061243057251	-0.4813168942928314	2.4649817943573	-0.1400434672832489	-1.7406185865402222	-0.5095595717430115	1.4700464010238647	0.20919713377952576	-2.918492317199707	-4.015033721923828	-4.033336639404297	-5.211408615112305	-6.166313171386719	-7.547582626342773	-8.408738136291504	-4.32863187789917
ENSG00000234518.2	-1.7078536748886108	-0.6644986867904663	-0.36147183179855347	1.2273882627487183	-0.8219435214996338	-1.886506199836731	2.6433029174804688	-0.7338331937789917	-3.767839193344116	-3.29532527923584	-3.343761920928955	-4.877147674560547	-5.810578346252441	-7.174558162689209	-9.019636154174805	-4.405271530151367
ENSG00000162645.12	-0.7707109451293945	-0.8363581895828247	2.1341757774353027	0.277630090713501	-1.035342812538147	-0.20589247345924377	1.0301302671432495	0.7669986486434937	-3.719514846801758	-3.857123374938965	-4.104880332946777	-4.903594493865967	-6.101201057434082	-7.824066162109375	-8.858355522155762	-4.384059429168701
ENSG00000162654.8	0.820062518119812	2.6158108711242676	1.1946803331375122	0.5415915250778198	-1.055700421333313	-0.9887869358062744	1.6754220724105835	-0.7540990114212036	-3.5359439849853516	-4.341379642486572	-4.351533889770508	-6.215983867645264	-6.423138618469238	-8.442672729492188	-8.819991111755371	-4.164822101593018
ENSG00000225492.6	-0.555819034576416	-0.006949964910745621	0.8664125800132751	0.2532508671283722	-0.5781829953193665	-0.21553155779838562	0.5185282230377197	-0.6669712066650391	-2.9714739322662354	-3.174607753753662	-3.3574275970458984	-4.75663423538208	-5.678134918212891	-6.00963830947876	-7.578730583190918	-3.4183714389801025
ENSG00000197147.12	-1.534326434135437	0.22142329812049866	-0.3260754942893982	-0.8660444021224976	-0.1196383386850357	-1.017147183418274	4.786226749420166	0.6214321851730347	-3.6463568210601807	-3.459310293197632	-3.494143009185791	-4.365339279174805	-5.489974021911621	-6.245576858520508	-7.396412372589111	-3.671659469604492
ENSG00000231999.6	-0.663642406463623	-0.3022615611553192	-1.372342824935913	-0.9536926746368408	-2.0055549144744873	-0.21406468749046326	1.8706036806106567	0.34922608733177185	-3.962953567504883	-2.6411962509155273	-3.7477965354919434	-4.083397388458252	-5.960772514343262	-6.16182804107666	-8.306936264038086	-3.8232874870300293
ENSG00000230735.1	-0.8817545175552368	0.054683949798345566	-1.0617514848709106	-0.742918848991394	-0.7365294694900513	1.0538395643234253	1.4491339921951294	0.007217198610305786	-2.6894633769989014	-2.326422691345215	-2.5380032062530518	-4.069827079772949	-4.748699188232422	-5.635313034057617	-7.323912620544434	-4.0023193359375
ENSG00000171488.14	-0.709966242313385	0.5324141979217529	0.11204557865858078	-0.5956182479858398	-0.555741012096405	-0.46869519352912903	2.0926461219787598	-0.5310126543045044	-3.7265961170196533	-2.8981480598449707	-3.388920307159424	-4.4001288414001465	-5.411115646362305	-6.089179515838623	-7.532029151916504	-3.926910877227783
ENSG00000231613.1	0.2179526835680008	0.03687464818358421	-0.6195851564407349	-0.20476576685905457	-0.23511959612369537	0.2530948221683502	0.2385471761226654	0.11733555793762207	-3.52290678024292	-2.476769208908081	-2.9917807579040527	-3.824005126953125	-4.72079610824585	-5.363440990447998	-7.088789939880371	-3.375291585922241
ENSG00000272931.1	-0.10305328667163849	0.11686739325523376	-0.03509189188480377	-0.05308063328266144	0.13896813988685608	0.015043742954730988	0.3395131826400757	-0.18689152598381042	-4.183987140655518	-2.946415424346924	-3.587179660797119	-4.864834785461426	-5.622860908508301	-6.746090412139893	-8.948101997375488	-3.8703103065490723
ENSG00000171492.14	-1.475492238998413	1.2262319326400757	-1.2601914405822754	-0.9417746067047119	-1.620653510093689	-2.138169527053833	3.6576313972473145	0.06537160277366638	-3.6587605476379395	-3.4412753582000732	-3.7611136436462402	-4.410091400146484	-5.581212997436523	-6.562572479248047	-7.4054274559021	-4.081852912902832
ENSG00000272672.1	-0.4402000308036804	-0.14284268021583557	-0.9601420164108276	-0.413128525018692	-0.4686771631240845	0.7292867302894592	1.0312707424163818	-0.09782502055168152	-4.285247325897217	-2.99643874168396	-3.5110836029052734	-4.500960826873779	-5.953621864318848	-6.171755790710449	-8.243989944458008	-3.712622880935669
ENSG00000228175.3	-0.7360432147979736	0.2566186487674713	0.1187535747885704	0.38336285948753357	0.29202863574028015	-0.887613832950592	0.8091766238212585	-0.8827962875366211	-3.075883626937866	-2.737262725830078	-2.7228593826293945	-4.3975324630737305	-4.983371734619141	-5.695840835571289	-7.704388618469238	-2.9687860012054443
ENSG00000162664.16	-0.44645774364471436	-0.10703334212303162	-0.2651081085205078	-0.8859758377075195	-1.4936538934707642	0.3041267693042755	2.9455456733703613	0.10811266303062439	-3.769721746444702	-2.6323959827423096	-3.2953457832336426	-4.263143539428711	-5.569408416748047	-6.202649116516113	-7.917712688446045	-3.5297842025756836
ENSG00000233593.8	-0.3486754596233368	-0.5374208092689514	-0.242479145526886	-0.356159508228302	-0.9696294665336609	-0.11648976057767868	0.5124830603599548	-0.18906262516975403	-3.6465089321136475	-2.852496862411499	-3.30157470703125	-4.1543145179748535	-5.308196067810059	-6.232557773590088	-7.951197624206543	-3.7261085510253906
ENSG00000232882.1	0.6432802081108093	0.15961161255836487	0.698419988155365	0.8041456937789917	-0.9433531165122986	0.14531317353248596	2.8314149379730225	-1.2537513971328735	-3.7110280990600586	-3.1676459312438965	-3.36605167388916	-4.722837924957275	-5.951197624206543	-6.570178031921387	-8.33539867401123	-3.199460983276367
ENSG00000122482.20	-0.36048424243927	-0.1071065366268158	-0.2396603226661682	-1.1552525758743286	-1.8843106031417847	-0.7913201451301575	4.659831523895264	-0.0992521345615387	-3.5773489475250244	-3.0200181007385254	-3.4992446899414062	-4.239243984222412	-5.459166526794434	-6.058540344238281	-7.602821350097656	-3.63443922996521
ENSG00000162669.15	0.544129490852356	-0.9407464265823364	-0.18311631679534912	-0.9428364038467407	-0.8420613408088684	0.512130618095398	1.2972122430801392	-0.878190279006958	-3.329899787902832	-2.036856174468994	-2.7464404106140137	-3.5433244705200195	-5.052565574645996	-5.301214218139648	-7.540185928344727	-3.2041678428649902
ENSG00000097046.12	-0.6639515161514282	-0.6963742971420288	-0.1262778639793396	-0.41139915585517883	0.5107160806655884	-0.06443925946950912	2.3576908111572266	0.6146320104598999	-3.9506256580352783	-2.9994165897369385	-3.2754878997802734	-4.116633415222168	-5.8078718185424805	-6.260220050811768	-7.91995906829834	-3.4220306873321533
ENSG00000069702.10	-0.3735300302505493	0.0772489607334137	2.2512264251708984	-0.4161522686481476	-1.61094331741333	-0.12030240148305893	2.3206655979156494	-0.6990240812301636	-3.1162569522857666	-3.215148448944092	-3.6053380966186523	-4.209129333496094	-5.526291847229004	-5.819021224975586	-7.3120598793029785	-4.01762056350708
ENSG00000239794.3	-0.056409042328596115	-0.045964036136865616	0.17536097764968872	0.08771941065788269	-0.3910091519355774	0.40402916073799133	0.24897801876068115	-0.40825191140174866	-3.269487142562866	-2.9524598121643066	-3.749268054962158	-4.1491241455078125	-5.451908111572266	-6.173486709594727	-8.431164741516113	-3.80001163482666
ENSG00000172031.6	-1.0072702169418335	-1.275976538658142	-0.575096070766449	-0.6396160125732422	1.8252652883529663	-0.8197478652000427	3.710204601287842	0.49604615569114685	-3.2120258808135986	-3.00632905960083	-2.293750047683716	-4.0186872482299805	-4.9821014404296875	-5.6677775382995605	-7.514062404632568	-3.0028512477874756
ENSG00000233228.1	-1.1352254152297974	-0.2277218997478485	-0.2738472521305084	0.1007871925830841	0.4733881950378418	0.24844834208488464	0.3714289367198944	-0.7678136825561523	-3.1544189453125	-1.9832607507705688	-2.2451791763305664	-3.512748956680298	-4.487580299377441	-4.859807968139648	-7.227657318115234	-2.9431376457214355
ENSG00000189195.10	-0.6527718305587769	-0.05179867520928383	-0.5179306268692017	-1.5071563720703125	-0.49255359172821045	-0.3741959035396576	2.4412314891815186	-0.3617819845676422	-3.6814377307891846	-3.071838140487671	-3.102940082550049	-4.4836859703063965	-5.369081497192383	-5.889508247375488	-7.8593268394470215	-3.437206506729126
ENSG00000233401.1	-0.719136655330658	0.5056576132774353	-0.5531711578369141	-0.18297278881072998	-1.0005072355270386	0.7195777893066406	0.444164901971817	-0.22548627853393555	-3.3755617141723633	-2.295173168182373	-2.721048355102539	-4.135900020599365	-4.990434646606445	-5.123201847076416	-7.452035903930664	-3.3147130012512207
ENSG00000273487.1	-1.208420991897583	0.4448632299900055	-0.07270682603120804	-0.5949549078941345	-0.1675727218389511	-0.15262600779533386	2.3232779502868652	-1.2007099390029907	-3.3638641834259033	-2.8347363471984863	-2.9239115715026855	-4.159424304962158	-5.1623334884643555	-5.3274245262146	-7.235095977783203	-3.41040301322937
ENSG00000203910.8	-0.04801082983613014	-0.0004708506166934967	-0.3015342354774475	-0.4541777968406677	0.2616010308265686	0.6009112596511841	0.42153802514076233	-0.1676451861858368	-3.4721596240997314	-2.554323434829712	-3.032303810119629	-3.722074270248413	-4.915678024291992	-5.209639072418213	-7.335254669189453	-3.5715854167938232
ENSG00000174842.16	0.04354668781161308	-0.7877453565597534	-1.078003168106079	-1.5445789098739624	0.8645712733268738	-0.1316058337688446	3.63655424118042	0.3993860185146332	-3.8245656490325928	-3.1245675086975098	-2.755305290222168	-4.485669136047363	-5.6796770095825195	-6.514196395874023	-8.390679359436035	-3.4420342445373535
ENSG00000122484.8	-0.7998853921890259	-0.4291721284389496	-0.06914050132036209	-0.40612322092056274	-0.1999230533838272	0.7436633706092834	3.4990861415863037	-0.4846295416355133	-3.6975162029266357	-2.799072265625	-2.9702019691467285	-4.360110282897949	-5.252378463745117	-6.0773844718933105	-7.864120960235596	-3.41391921043396
ENSG00000067208.14	0.3127927780151367	-0.4719744622707367	-0.2634403109550476	-1.3406811952590942	-1.7334883213043213	-0.2731662690639496	3.9454469680786133	-0.3629371225833893	-3.9672698974609375	-3.017825126647949	-3.600027561187744	-4.426339149475098	-5.886024475097656	-6.479311943054199	-8.322049140930176	-3.6719837188720703
ENSG00000223787.2	-0.5247157216072083	-0.11073991656303406	-0.9964143633842468	-0.0043179988861083984	-1.217964768409729	0.972900927066803	1.0048867464065552	-0.2161293923854828	-3.091752052307129	-2.544780731201172	-3.180884838104248	-3.4609365463256836	-4.812177658081055	-5.150918483734131	-6.871347427368164	-3.3681459426879883
ENSG00000229992.1	-0.9465705752372742	0.39870336651802063	-0.779045581817627	-0.739497184753418	-1.9277127981185913	1.2751566171646118	1.808647632598877	-0.24164357781410217	-4.396293640136719	-2.4779951572418213	-3.933302879333496	-4.545975685119629	-6.355316162109375	-7.500856876373291	-9.645662307739258	-4.15369176864624
ENSG00000201317.1	-0.19844920933246613	0.3102196455001831	0.17854705452919006	-1.1801198720932007	-0.693919837474823	1.0245808362960815	0.7281287312507629	-0.060574620962142944	-3.431713819503784	-2.9961836338043213	-3.2785515785217285	-4.428406715393066	-5.834872245788574	-5.530364513397217	-6.901738166809082	-3.618600368499756
ENSG00000234202.2	-0.5333006381988525	0.2513795495033264	-0.2457757592201233	-0.7753497362136841	-0.42004817724227905	0.3978746235370636	0.4392714202404022	0.2717788517475128	-4.202206134796143	-2.418163537979126	-2.724033832550049	-3.8934009075164795	-5.231997489929199	-6.18051815032959	-8.356281280517578	-3.5008251667022705
ENSG00000122406.12	0.34743988513946533	-2.1509110927581787	-0.40700632333755493	-0.7494382858276367	-1.0850889682769775	-2.26173734664917	7.294125080108643	-0.2833527624607086	-3.74857497215271	-3.253690242767334	-3.4898319244384766	-4.553685188293457	-5.999143600463867	-6.911330699920654	-8.83867359161377	-3.320375680923462
ENSG00000154511.11	-0.976198673248291	0.7403708696365356	-0.3608478903770447	-1.169091820716858	-0.7697449922561646	-1.5187041759490967	4.73679780960083	0.00617179274559021	-3.1244819164276123	-3.1407904624938965	-3.255810260772705	-4.050377368927002	-5.21394157409668	-5.805761337280273	-6.927994251251221	-3.566948652267456
ENSG00000207523.1	-1.6481095552444458	0.7114874124526978	-1.060275673866272	0.804723858833313	-0.5314062237739563	-1.310336709022522	1.1140644550323486	-0.12029340863227844	-3.207653284072876	-2.0346555709838867	-2.3246326446533203	-3.8446431159973145	-5.217656135559082	-6.906655788421631	-8.061684608459473	-4.269317626953125
ENSG00000143033.17	-0.8045399188995361	0.053892042487859726	-0.8688657879829407	-1.0041216611862183	-0.4960649609565735	0.4655741751194	3.432464599609375	0.3085068166255951	-4.085233688354492	-2.996004343032837	-3.3254823684692383	-4.504815578460693	-6.003289222717285	-6.583178520202637	-7.923416614532471	-4.034489631652832
ENSG00000117500.12	-0.976913571357727	-0.6652497053146362	1.2080646753311157	-1.1569234132766724	-1.1592552661895752	-0.7774386405944824	3.0663259029388428	-0.4626220762729645	-3.8240549564361572	-3.2011337280273438	-3.158353805541992	-3.911574363708496	-5.319234848022461	-6.036429405212402	-7.561829090118408	-3.733980178833008
ENSG00000122483.17	-0.3685992956161499	-0.62876296043396	0.32074442505836487	-0.2709076702594757	-0.32370758056640625	0.7282194495201111	1.5489106178283691	-0.41053107380867004	-3.7937657833099365	-2.625788450241089	-3.19091796875	-4.092626571655273	-5.300052642822266	-6.249394416809082	-8.30362606048584	-3.555288314819336
ENSG00000223745.7	-0.925722062587738	-0.5497068166732788	-1.3618619441986084	-0.8627544641494751	-1.756097435951233	0.6940663456916809	2.708913564682007	-0.7637280225753784	-4.176063537597656	-2.717196226119995	-3.1611380577087402	-4.310990333557129	-5.73585319519043	-6.657841205596924	-8.54626178741455	-3.6357717514038086
ENSG00000229567.1	-1.1666947603225708	-0.2694571912288666	-0.6944825649261475	-0.464032918214798	-1.656849980354309	1.3461371660232544	1.4091036319732666	-1.06564199924469	-3.2463653087615967	-2.165188789367676	-3.0939688682556152	-3.6526060104370117	-6.122209548950195	-6.403517246246338	-8.454289436340332	-3.3511486053466797
ENSG00000117505.12	-0.3464827537536621	-0.1961859166622162	0.022849969565868378	-1.027050495147705	-0.03666262328624725	-0.8102311491966248	3.208240509033203	-0.1448630392551422	-3.8201937675476074	-3.2846181392669678	-3.298340320587158	-4.532102108001709	-5.809185028076172	-6.403739929199219	-8.095396041870117	-3.6653106212615967
ENSG00000207379.1	0.6851894855499268	-0.07214519381523132	-0.3330591917037964	-0.9659689664840698	-0.2819483280181885	0.9408718943595886	0.6880825161933899	0.6890255212783813	-3.4131109714508057	-1.8356270790100098	-2.027339458465576	-3.7792983055114746	-5.362588882446289	-4.902289390563965	-7.888523578643799	-2.942582607269287
ENSG00000137942.16	-1.628036379814148	0.3501035273075104	0.057801418006420135	-0.6119943261146545	0.5838432908058167	0.4464775621891022	6.097047328948975	-1.1410964727401733	-3.524279832839966	-3.093432903289795	-2.5435516834259033	-4.195785999298096	-5.2981977462768555	-6.261889457702637	-7.043692111968994	-3.7043871879577637
ENSG00000137936.16	-0.1787385195493698	-0.4911569058895111	1.7434014081954956	0.18501275777816772	-1.2143124341964722	-0.2525802552700043	2.6813039779663086	-1.8176790475845337	-3.627260446548462	-3.4051313400268555	-3.4243392944335938	-4.612908363342285	-5.27446174621582	-6.458880424499512	-7.754394054412842	-3.824530839920044
ENSG00000224093.5	0.24425442516803741	0.25407764315605164	-1.063809871673584	0.05961379408836365	0.3432786464691162	1.437421202659607	1.260626196861267	0.4241943061351776	-3.0527074337005615	-2.508409023284912	-2.138137102127075	-3.373570442199707	-4.618276596069336	-5.159613609313965	-7.3484368324279785	-3.70259690284729
ENSG00000211575.3	-1.4066054821014404	-0.501062273979187	-2.1197595596313477	2.83771014213562	1.5117542743682861	-2.0255887508392334	2.0004148483276367	-0.08299639821052551	-1.4088108539581299	-0.27865034341812134	-0.022776484489440918	-1.5253374576568604	-3.268289566040039	-2.5948703289031982	-2.8966639041900635	-1.4581408500671387
ENSG00000260464.1	-0.35083866119384766	-0.95079505443573	-0.24645376205444336	-0.3945905864238739	1.0643290281295776	0.17977425456047058	2.6313323974609375	-0.43089762330055237	-3.7063541412353516	-2.3936760425567627	-2.6454644203186035	-4.087935447692871	-5.206937789916992	-5.510223388671875	-7.318017959594727	-3.031606435775757
ENSG00000067334.13	-0.599671483039856	-0.4262736737728119	0.5212278962135315	-0.379254549741745	-0.2670227885246277	-1.0952681303024292	3.206265687942505	-0.5214110612869263	-3.4326791763305664	-3.178309917449951	-3.327409267425537	-4.606639385223389	-5.341317176818848	-6.492306709289551	-8.156150817871094	-3.5155251026153564
ENSG00000023909.9	-0.15914957225322723	-0.5521637201309204	1.0446076393127441	-1.1930041313171387	-0.28671228885650635	-0.0800677165389061	3.107705593109131	-0.023699194192886353	-4.270251750946045	-3.7224106788635254	-3.6320080757141113	-5.084229946136475	-6.134281158447266	-7.4982123374938965	-8.461055755615234	-3.7873435020446777
ENSG00000137962.12	0.9977883100509644	0.0798361599445343	1.4793108701705933	0.12933552265167236	-0.8207035660743713	0.6986824870109558	2.018502950668335	0.43557628989219666	-3.624931573867798	-3.246622323989868	-3.27998685836792	-4.105621337890625	-5.582856178283691	-6.306234836578369	-7.64224910736084	-3.957634687423706
ENSG00000117528.11	0.49832940101623535	0.006307270377874374	0.5639007687568665	-1.3704392910003662	-1.3649286031723022	-0.3469233214855194	4.170487880706787	-0.10742941498756409	-3.6569368839263916	-3.438995838165283	-3.523163318634033	-4.2998175621032715	-5.587656021118164	-6.003532409667969	-7.40802526473999	-3.7849314212799072
ENSG00000117525.13	0.9400378465652466	-1.5038708448410034	3.2193551063537598	-0.31429216265678406	-1.9027472734451294	-0.479285329580307	5.950780391693115	0.5298029184341431	-3.0772528648376465	-3.1129634380340576	-3.053370952606201	-3.5106213092803955	-6.669651031494141	-5.742588996887207	-6.66886043548584	-3.2056381702423096
ENSG00000224081.8	-0.1496231108903885	-0.8669753670692444	0.5132399201393127	0.11179563403129578	-0.6694076657295227	0.18359369039535522	0.412447988986969	-0.2832984924316406	-3.187838315963745	-2.714308023452759	-3.0218892097473145	-3.915332794189453	-5.0487060546875	-5.236715316772461	-7.239718437194824	-3.1848671436309814
ENSG00000263526.1	0.3036041259765625	-0.6820553541183472	0.9658761620521545	0.5163557529449463	-1.4836556911468506	0.9853083491325378	0.5131230354309082	0.09872505068778992	-2.8134944438934326	-3.490673065185547	-3.495337963104248	-4.1102681159973145	-5.756183624267578	-4.271857261657715	-7.043550968170166	-3.297017812728882
ENSG00000143036.16	-0.5470818877220154	-1.5271159410476685	1.9464203119277954	-0.3519216775894165	-1.1594058275222778	0.2559715211391449	1.779007911682129	-0.8415608406066895	-3.6069982051849365	-2.9358177185058594	-3.1743693351745605	-4.116115093231201	-5.682692527770996	-5.658979415893555	-7.4355597496032715	-3.209564447402954
ENSG00000117519.15	-0.23851953446865082	-1.8038386106491089	2.676529884338379	-0.8603149652481079	-2.669524908065796	-1.0493003129959106	6.637020587921143	-0.7644418478012085	-3.5616047382354736	-3.4865036010742188	-3.797816753387451	-4.296370029449463	-6.609244346618652	-6.774827480316162	-7.787482261657715	-3.631678819656372
ENSG00000235501.5	0.5773102641105652	-0.21310672163963318	0.0346180722117424	-0.8552819490432739	-1.8264966011047363	-0.3855731189250946	2.248203754425049	0.07216820120811462	-3.5891807079315186	-2.869272232055664	-3.6683454513549805	-3.9231419563293457	-5.9273681640625	-6.481092929840088	-7.866429328918457	-3.8165462017059326
ENSG00000172339.9	-0.18090246617794037	-0.10972854495048523	-0.4848824739456177	-0.4922405779361725	0.28494954109191895	-0.3587246239185333	1.6590627431869507	0.13574466109275818	-4.043126106262207	-3.2118077278137207	-3.3967552185058594	-4.446845531463623	-5.837430953979492	-6.450217247009277	-8.299568176269531	-3.767810106277466
ENSG00000152078.9	-0.4455091953277588	2.3271888494491577e-05	0.7607802748680115	-1.6068832874298096	0.2794036865234375	-0.36596807837486267	3.849575996398926	-0.07553306221961975	-3.157092571258545	-3.247544050216675	-3.0020346641540527	-4.2782158851623535	-5.24934196472168	-5.474061012268066	-6.969066619873047	-3.6449668407440186
ENSG00000271092.5	-0.24020810425281525	-0.07237568497657776	0.047977931797504425	-0.881340742111206	0.13359902799129486	0.14210405945777893	0.5431690216064453	-0.47564008831977844	-3.7378883361816406	-2.9713926315307617	-2.899604320526123	-4.178579330444336	-5.289194107055664	-5.597872257232666	-7.67102575302124	-3.707850694656372
ENSG00000231992.1	0.07459761202335358	0.03594246134161949	0.02618192881345749	-0.21498681604862213	-0.7739191651344299	0.5504857897758484	1.2817485332489014	-0.2854445278644562	-3.451727867126465	-2.6087939739227295	-3.151613235473633	-4.787924766540527	-5.034697532653809	-6.007562160491943	-8.16025447845459	-3.177710771560669
ENSG00000226026.5	-0.23882432281970978	0.2289341390132904	-0.03736824542284012	-0.5643265247344971	-0.9194098114967346	0.11812395602464676	0.7912391424179077	-0.43182888627052307	-3.296682119369507	-2.8219408988952637	-2.9755477905273438	-3.9698123931884766	-5.046934127807617	-5.717512607574463	-7.304844379425049	-3.6558055877685547
ENSG00000122481.16	-0.3198760151863098	-0.5299121141433716	-0.2796818017959595	-0.7211771011352539	-0.32613426446914673	0.2133500874042511	2.006457567214966	-0.51958167552948	-3.7135965824127197	-2.850695848464966	-3.0795845985412598	-4.137223243713379	-5.116382598876953	-5.736947536468506	-7.48179817199707	-3.4804461002349854
ENSG00000228502.1	-0.32266294956207275	0.029269006103277206	-0.16642561554908752	1.8374230861663818	0.08479849994182587	-1.73770272731781	0.5990502834320068	-0.2060563862323761	-3.8120954036712646	-2.8522677421569824	-3.1783108711242676	-4.814831733703613	-5.681462287902832	-6.816756725311279	-7.895463466644287	-4.165956020355225
ENSG00000137970.7	0.16188491880893707	-1.4782813787460327	-0.8152239918708801	-1.1216431856155396	-0.5429331660270691	-1.9700042009353638	5.901981353759766	0.06104287505149841	-4.525690078735352	-3.4722249507904053	-3.6945419311523438	-5.070734977722168	-6.512910842895508	-7.5962138175964355	-9.660707473754883	-3.681378126144409
ENSG00000117569.18	-0.4370424747467041	0.34031572937965393	-0.9078039526939392	-1.015374779701233	-0.8494600653648376	-0.7968396544456482	3.163304328918457	0.22484168410301208	-3.8768913745880127	-3.057830572128296	-3.3820018768310547	-4.175795555114746	-5.5889482498168945	-6.334400177001953	-7.757850646972656	-3.6448092460632324
ENSG00000188641.12	-0.5399148464202881	-0.7579632997512817	-1.4155020713806152	-0.965461254119873	-2.2738685607910156	-0.2432135045528412	3.1638410091400146	0.5499697923660278	-3.954307794570923	-2.7155516147613525	-3.339773654937744	-4.0202741622924805	-5.88737678527832	-6.520028114318848	-8.394253730773926	-3.465574026107788
ENSG00000232542.1	-0.7746644020080566	0.11483117938041687	-1.3770090341567993	-0.6611559391021729	-1.8045010566711426	0.6682469248771667	0.7681465148925781	0.5419962406158447	-3.8783798217773438	-2.440768241882324	-3.310080051422119	-3.6897828578948975	-5.036205291748047	-5.969180107116699	-7.888214111328125	-3.5363311767578125
ENSG00000269998.1	-0.9923551082611084	-0.03372916951775551	-1.095076322555542	-0.07030147314071655	0.9815070033073425	1.6711845397949219	2.7113585472106934	-0.20493903756141663	-3.677581310272217	-1.9634459018707275	-2.26332426071167	-3.141622543334961	-4.55035400390625	-6.265309810638428	-7.639270305633545	-3.4164681434631348
ENSG00000259946.1	-1.1426458358764648	-0.1722073256969452	-0.18528342247009277	-0.2576684355735779	0.6667082905769348	2.2677388191223145	2.0930914878845215	-0.36139288544654846	-3.391176700592041	-2.1101813316345215	-2.4848403930664062	-3.5212035179138184	-4.83868408203125	-5.488880157470703	-8.129087448120117	-3.612741231918335
ENSG00000225206.7	-0.9418680667877197	-0.33622393012046814	-0.42637768387794495	-0.011823982000350952	0.9380981922149658	1.6735669374465942	2.908329486846924	-0.6455613374710083	-3.5421226024627686	-2.0898828506469727	-2.5239720344543457	-3.5403103828430176	-5.157085418701172	-6.022775650024414	-8.076872825622559	-3.395761489868164
ENSG00000162627.16	-0.08321647346019745	-0.44773730635643005	1.036023497581482	-1.4264442920684814	-1.2470808029174805	-0.11788740009069443	2.5395357608795166	-0.5826300382614136	-3.2526943683624268	-2.9951953887939453	-3.5333991050720215	-4.181540489196777	-5.355647087097168	-5.9722137451171875	-7.380047798156738	-3.5096077919006348
ENSG00000117598.11	-0.48873472213745117	-0.3200424611568451	-0.49356943368911743	-0.9282666444778442	1.5240930318832397	-0.5957939028739929	2.9936676025390625	-0.7378586530685425	-4.049347400665283	-3.3732223510742188	-2.9427919387817383	-4.470912456512451	-5.343073844909668	-6.845595359802246	-8.342728614807129	-3.7934415340423584
ENSG00000232825.1	0.10308961570262909	0.24356964230537415	-0.3565822243690491	-0.2751050293445587	0.7017123103141785	0.08566498011350632	0.47458940744400024	0.03974190354347229	-3.4319510459899902	-2.761098623275757	-2.777977466583252	-3.9066057205200195	-4.735420227050781	-5.440414905548096	-6.7757768630981445	-3.3470356464385986
ENSG00000227034.1	-0.5205621719360352	-0.8316705226898193	-0.46455514430999756	-0.07118137180805206	0.31672483682632446	1.7789725065231323	1.537443995475769	-0.40841200947761536	-3.1490588188171387	-2.2101709842681885	-1.4740616083145142	-2.485928535461426	-3.9573400020599365	-3.892714738845825	-6.012091159820557	-2.6280455589294434
ENSG00000117600.12	-1.2641772031784058	0.9474912881851196	-0.41565436124801636	-0.7051185369491577	2.219844341278076	-1.5209726095199585	6.341604232788086	-0.17999544739723206	-3.6754684448242188	-3.395936965942383	-2.950547218322754	-4.198203086853027	-5.232244491577148	-6.371123313903809	-7.746201038360596	-3.5971062183380127
ENSG00000099260.10	0.596296489238739	0.5608760118484497	0.8513126969337463	-0.22537097334861755	-1.0724172592163086	0.25571903586387634	1.1769224405288696	-0.5993534326553345	-4.235744476318359	-3.606562614440918	-4.0694451332092285	-5.062899112701416	-6.131957054138184	-7.722463130950928	-9.269969940185547	-4.436403274536133
ENSG00000156869.12	-0.4423506557941437	-0.1220342218875885	-0.00596696138381958	-0.16936542093753815	-0.11215697228908539	-0.33226028084754944	0.0730949267745018	-0.32573360204696655	-3.4364054203033447	-2.861375570297241	-3.274233818054199	-4.218057632446289	-4.866140365600586	-5.703181743621826	-7.2885847091674805	-3.653564929962158
ENSG00000162688.16	0.9283125400543213	0.7174239158630371	-0.06742537766695023	-2.030339479446411	0.0033702999353408813	0.3488195240497589	2.408897876739502	-0.34083476662635803	-3.789088249206543	-3.0201377868652344	-3.1481451988220215	-4.134930610656738	-5.579675674438477	-5.802423477172852	-7.350327491760254	-3.755363941192627
ENSG00000228084.1	0.14684058725833893	0.10663524270057678	-0.9007676243782043	-0.8456904888153076	0.6158161759376526	-0.4728682339191437	1.52791166305542	0.40093138813972473	-4.3541259765625	-3.3127946853637695	-3.8984689712524414	-5.030766487121582	-6.9838714599609375	-7.36992073059082	-10.31418514251709	-4.654446601867676
ENSG00000117620.13	-0.5617340207099915	-0.015715930610895157	-0.06156349927186966	-0.9001177549362183	-0.4876942038536072	0.10390923172235489	1.9345228672027588	-0.0023585855960845947	-4.055777072906494	-3.2624473571777344	-3.381844997406006	-4.659343242645264	-5.607348442077637	-6.422038555145264	-7.79840612411499	-3.8022541999816895
ENSG00000212248.1	-0.48471957445144653	-0.3267364501953125	-0.3049657940864563	-1.0027971267700195	-0.032475546002388	1.1991826295852661	0.724226176738739	-0.1145872175693512	-2.2390687465667725	-2.2302660942077637	-2.324639320373535	-3.228569984436035	-3.6007258892059326	-4.4780731201171875	-7.092161655426025	-2.981812000274658
ENSG00000156875.13	-0.3972405195236206	0.6972724199295044	0.3541044592857361	-0.9244318008422852	-0.9068916440010071	-1.6982828378677368	4.789156436920166	0.31678685545921326	-3.769552230834961	-3.4957151412963867	-3.518632411956787	-4.3124895095825195	-5.657711982727051	-6.414907455444336	-7.5650739669799805	-3.7301676273345947
ENSG00000156876.9	-0.38848188519477844	0.4297519028186798	-0.4650387763977051	-0.9151510000228882	-1.0404529571533203	0.08203575760126114	1.2782440185546875	-0.32940295338630676	-3.745366334915161	-2.6814939975738525	-3.190243721008301	-4.214137554168701	-5.132454872131348	-6.0698699951171875	-7.4897050857543945	-3.496185302734375
ENSG00000122435.9	-1.2610008716583252	-0.3326333463191986	-1.240379810333252	-0.9834238290786743	-1.7968006134033203	0.010894335806369781	2.5444130897521973	-0.451946884393692	-3.7063162326812744	-2.5274927616119385	-3.035998821258545	-4.27031135559082	-5.319930076599121	-6.217031478881836	-7.77630090713501	-3.4655048847198486
ENSG00000122477.12	0.03530712053179741	-0.5901418924331665	-0.8106377720832825	-0.6124185919761658	0.6030301451683044	0.3610379993915558	2.702911376953125	0.549135684967041	-3.0361461639404297	-2.6372270584106445	-2.889192581176758	-4.1133904457092285	-4.260169982910156	-5.744711399078369	-7.009997844696045	-2.6568076610565186
ENSG00000137992.14	-0.698773980140686	-0.13007745146751404	0.22711807489395142	-1.0063776969909668	-0.08118398487567902	-0.36145684123039246	3.4611024856567383	-0.6060081720352173	-3.7158749103546143	-3.28202486038208	-3.2686333656311035	-4.482261657714844	-5.5213422775268555	-6.198431015014648	-7.539121150970459	-3.739922285079956
ENSG00000224616.1	-0.3879690170288086	0.25762954354286194	-0.7684127688407898	-0.7795153856277466	-1.379262924194336	0.09206513315439224	2.967439651489258	-0.8020247220993042	-3.9511971473693848	-2.788756847381592	-3.064962387084961	-4.002978801727295	-6.0175018310546875	-6.206509113311768	-8.193696975708008	-3.630948543548584
ENSG00000137996.12	-0.3392672538757324	-0.26835235953330994	-0.5930278897285461	-0.33341076970100403	0.03365038335323334	-1.2462064027786255	3.8847851753234863	0.35127338767051697	-3.707144021987915	-3.295466899871826	-3.263956069946289	-4.5006422996521	-5.656436920166016	-6.6686272621154785	-8.174763679504395	-3.3413898944854736
ENSG00000207750.1	0.5423571467399597	-0.25985559821128845	-1.722077488899231	-2.377527952194214	-1.6243443489074707	1.890148639678955	2.6607983112335205	-0.34832945466041565	-4.92447566986084	-3.261575698852539	-3.548819065093994	-6.0754594802856445	-7.74472713470459	-8.94157600402832	-10.82533073425293	-5.250857353210449
ENSG00000079335.18	-0.2373671680688858	-0.24602851271629333	1.3134492635726929	-0.5064224004745483	-1.196485996246338	0.3353799283504486	1.365593671798706	-0.8129647970199585	-3.3604073524475098	-2.8578805923461914	-3.4540138244628906	-4.6041789054870605	-5.212267875671387	-5.983565330505371	-7.8706955909729	-3.8386385440826416
ENSG00000234332.1	0.04575921222567558	-0.0625392496585846	-0.410344660282135	-0.016985192894935608	0.23834343254566193	-0.5058486461639404	0.32961320877075195	-0.13475024700164795	-3.0947978496551514	-2.60178804397583	-2.555652618408203	-4.036055564880371	-4.729816436767578	-5.2168803215026855	-6.9127726554870605	-3.006258964538574
ENSG00000181656.6	-2.1194400787353516	-0.4183290898799896	-1.7515991926193237	-0.671133279800415	2.436279535293579	-2.459641933441162	8.190302848815918	-0.7072042226791382	-2.137911558151245	-3.3180065155029297	-2.178434371948242	-3.4597272872924805	-5.019258499145508	-4.466187953948975	-6.995014667510986	-2.8741977214813232
ENSG00000162692.10	-0.23341967165470123	0.8018703460693359	1.2910182476043701	-1.1751824617385864	-1.5016484260559082	-0.43080970644950867	0.7392060160636902	-0.5421392917633057	-4.150763988494873	-2.703930139541626	-3.9010839462280273	-4.764190196990967	-6.248528480529785	-7.09259557723999	-9.167754173278809	-4.0075602531433105
ENSG00000162694.13	-1.0331131219863892	0.07762876152992249	-0.6496908068656921	-0.8744288682937622	1.231126308441162	-1.1603506803512573	4.409274578094482	0.44160565733909607	-3.155381202697754	-3.4159178733825684	-2.8353281021118164	-4.19156551361084	-5.61031436920166	-5.682385444641113	-7.088414669036865	-3.4709606170654297
ENSG00000273204.1	-0.8287599086761475	-0.16047486662864685	-0.7634453177452087	-0.3030987083911896	-0.2633039951324463	-0.34604689478874207	0.8103408217430115	-0.29822996258735657	-4.256592273712158	-2.7434377670288086	-3.229519844055176	-4.648883819580078	-5.9435014724731445	-6.39847469329834	-9.573657989501953	-3.817711353302002
ENSG00000162695.11	-0.07652394473552704	-0.9308532476425171	0.2239660620689392	-0.7823976278305054	-0.4609159231185913	0.15835312008857727	2.856689214706421	0.3466002643108368	-3.7325661182403564	-2.9856936931610107	-3.322261333465576	-4.4183268547058105	-5.779275894165039	-6.312530517578125	-7.926121234893799	-3.537468433380127
ENSG00000117543.20	-0.7040526866912842	-0.6697670221328735	-0.26314640045166016	-0.8265005350112915	-0.2789613604545593	-0.7067857384681702	2.8795576095581055	-0.5068603754043579	-3.6586899757385254	-3.1557374000549316	-3.5113329887390137	-4.52422571182251	-5.873490333557129	-6.441980361938477	-8.209303855895996	-3.5228281021118164
ENSG00000233184.6	-0.35385286808013916	-0.3205382525920868	0.13003063201904297	-0.6891908645629883	0.2689463198184967	0.08473912626504898	1.5840483903884888	-1.3590002059936523	-3.1572399139404297	-2.5737485885620117	-2.582293748855591	-4.11055326461792	-4.694572448730469	-5.428267955780029	-7.0027265548706055	-2.904792547225952
ENSG00000225938.1	0.4662891626358032	-0.589806079864502	0.4893501400947571	0.0923779308795929	-1.0252639055252075	0.24513229727745056	1.2069504261016846	-1.3115564584732056	-3.2021546363830566	-3.1499130725860596	-2.931426525115967	-4.232944488525391	-5.266304016113281	-5.909474849700928	-7.996380805969238	-3.6473171710968018
ENSG00000170989.8	1.8521043062210083	-0.1510990560054779	2.369516372680664	0.11007681488990784	-1.0664860010147095	-0.2560296952724457	6.014816761016846	-1.4644745588302612	-2.97841477394104	-3.2650680541992188	-3.3403024673461914	-4.042921543121338	-5.165033340454102	-5.913459777832031	-6.696324348449707	-3.832775354385376
ENSG00000260940.1	0.009774621576070786	0.17395061254501343	1.1349661350250244	-0.24791574478149414	-0.05032022297382355	0.4292878210544586	0.3924448788166046	-0.5940430164337158	-3.5430409908294678	-3.1766111850738525	-3.454561233520508	-4.211203098297119	-5.087141990661621	-5.824270725250244	-7.435730934143066	-3.816689968109131
ENSG00000183298.5	1.5963268280029297	-1.6332260370254517	-0.8268314003944397	-0.29301533102989197	0.48658114671707153	-1.4968782663345337	3.7409563064575195	0.5616742372512817	-0.5752375721931458	-2.26564884185791	-1.3067207336425781	-3.768333911895752	-3.6827690601348877	-4.159459590911865	-4.273298740386963	-2.408080816268921
ENSG00000118733.16	-1.688575267791748	-0.24021634459495544	-1.1122289896011353	-1.2879854440689087	2.399836301803589	-1.0883904695510864	3.5114049911499023	-0.14663353562355042	-3.562155246734619	-2.792710065841675	-2.0776939392089844	-4.104112148284912	-5.2003679275512695	-5.79695987701416	-7.7362236976623535	-3.153493881225586
ENSG00000060718.19	0.013455521315336227	0.251987487077713	0.16436529159545898	-0.10744976997375488	-0.8649203181266785	0.9540343880653381	2.6458065509796143	-0.3210996687412262	-4.003560543060303	-2.950080394744873	-3.175184726715088	-4.379319667816162	-6.076699256896973	-6.686306476593018	-8.16348934173584	-3.5295352935791016
ENSG00000234257.1	-0.2894267439842224	-0.22198238968849182	-0.053423888981342316	-0.3055388629436493	0.05782146751880646	0.45998522639274597	0.28163111209869385	-0.2337222397327423	-3.3483822345733643	-2.521852970123291	-3.0358991622924805	-3.5408360958099365	-5.055489540100098	-5.048618316650391	-6.874368190765381	-3.116462230682373
ENSG00000224613.6	-0.1291370540857315	-0.20436307787895203	0.23116770386695862	-0.23678836226463318	0.3049701452255249	0.08860404044389725	0.5194422602653503	-0.1007407009601593	-3.9638519287109375	-3.511802911758423	-3.203278064727783	-4.590123653411865	-6.0114850997924805	-6.658160209655762	-8.49203872680664	-4.138585090637207
ENSG00000185946.15	-0.22696219384670258	-0.33157405257225037	-0.6086203455924988	-0.628442645072937	-1.1538188457489014	1.4828652143478394	4.189395427703857	-0.377861887216568	-4.037227630615234	-2.666200637817383	-3.1469287872314453	-4.318402290344238	-5.771463394165039	-6.580760478973389	-8.393333435058594	-3.789930582046509
ENSG00000240038.6	0.685368537902832	-0.834626317024231	-0.5909307599067688	-1.1285358667373657	-0.2169521600008011	0.6058297753334045	4.1354169845581055	0.3185342252254486	-3.9929819107055664	-2.3653862476348877	-2.5996015071868896	-3.99218487739563	-5.456692695617676	-5.645782947540283	-7.908005714416504	-3.220399856567383
ENSG00000243480.7	-0.0379425473511219	-0.17199864983558655	-0.4634511470794678	-0.22686249017715454	0.3583274483680725	0.34744489192962646	0.5483677387237549	0.0031657516956329346	-3.587635040283203	-2.4791653156280518	-2.6635265350341797	-3.992914915084839	-4.820340156555176	-5.6239471435546875	-7.3121161460876465	-3.264822483062744
ENSG00000227850.1	0.2878666818141937	0.6972851157188416	-0.20452862977981567	0.43979331851005554	-0.8732622265815735	-0.9126967191696167	0.9146179556846619	-0.1304049789905548	-3.095735788345337	-3.1366164684295654	-3.3560285568237305	-4.756260871887207	-5.46866512298584	-6.461551666259766	-7.870084762573242	-3.7330005168914795
ENSG00000232952.1	-0.2914466857910156	0.570701003074646	0.049095265567302704	-0.2566753327846527	0.5411468744277954	-1.0810569524765015	0.7920885682106018	-0.12406817078590393	-3.640953779220581	-2.999603033065796	-3.229051113128662	-3.879054546356201	-4.946222305297852	-5.729891777038574	-7.2262372970581055	-3.5200541019439697
ENSG00000198890.7	-0.4230313301086426	0.8389683961868286	-0.8390675187110901	-0.6571663618087769	0.016572460532188416	-1.3318973779678345	2.7713770866394043	-0.06425324082374573	-3.9966795444488525	-3.2348473072052	-3.4041104316711426	-4.803281784057617	-5.656911849975586	-6.743229866027832	-8.768424034118652	-3.3489153385162354
ENSG00000162631.18	-0.4383271634578705	0.6002569794654846	-0.463594526052475	-0.4059475362300873	0.11158618330955505	-0.29597631096839905	1.0269300937652588	-0.6742680072784424	-3.8859591484069824	-2.7402799129486084	-2.8966026306152344	-4.204648494720459	-5.179189682006836	-6.22802734375	-7.514476299285889	-3.33136248588562
ENSG00000224550.1	-0.1662180870771408	-0.05673334375023842	-1.0745291709899902	-0.08770707249641418	0.6668620109558105	-0.46723759174346924	0.815153956413269	-0.5834336280822754	-3.9346861839294434	-3.8943679332733154	-3.817542552947998	-4.79115629196167	-6.695152282714844	-7.232900619506836	-9.507819175720215	-4.063660144805908
ENSG00000134215.15	-0.6113048791885376	-0.8022091388702393	0.17252439260482788	-0.06438514590263367	0.5098757743835449	0.465624064207077	1.5354242324829102	0.8512296676635742	-4.138123989105225	-2.785186529159546	-3.3277244567871094	-4.526930332183838	-5.662586212158203	-6.68302059173584	-8.491634368896484	-3.6381585597991943
ENSG00000085491.15	-0.31495875120162964	0.15995267033576965	0.131014883518219	-0.5842779278755188	-0.2977212071418762	-0.06188114732503891	1.6472270488739014	0.02560064196586609	-3.867828607559204	-3.3094520568847656	-3.661808967590332	-4.602043628692627	-5.351061820983887	-6.4331865310668945	-8.034942626953125	-3.80324649810791
ENSG00000196427.13	-0.3181535005569458	0.2940150797367096	-0.40235137939453125	-0.08373807370662689	0.29919272661209106	0.19326218962669373	0.302916556596756	-0.14233490824699402	-3.2516956329345703	-2.3918492794036865	-2.6879191398620605	-3.7741239070892334	-4.453561782836914	-5.007781982421875	-6.826942443847656	-3.1659395694732666
ENSG00000241361.8	-0.8830392956733704	0.4928249418735504	-1.1185625791549683	-0.6395226716995239	0.7492930293083191	0.3410443663597107	1.0416436195373535	-0.28219184279441833	-3.3683087825775146	-2.4175987243652344	-2.718672275543213	-3.967378616333008	-5.186387062072754	-5.568075180053711	-7.445072650909424	-3.556265354156494
ENSG00000238118.1	-0.40857231616973877	-0.05721602216362953	-0.9397255778312683	-0.48589012026786804	0.6365287899971008	0.4448475241661072	0.9874194264411926	-0.6721802949905396	-3.4598915576934814	-2.1693155765533447	-2.3540091514587402	-3.7052619457244873	-5.26247501373291	-5.321205139160156	-8.500316619873047	-2.593740463256836
ENSG00000162636.15	-0.5544775724411011	0.20268431305885315	-0.5534254908561707	-1.257141351699829	0.9580485224723816	-0.7758784890174866	2.3591578006744385	-0.3922194540500641	-3.9940545558929443	-3.2536513805389404	-3.4296298027038574	-4.499688625335693	-5.773515701293945	-6.580689430236816	-8.078971862792969	-3.7915291786193848
ENSG00000162639.15	-0.610424280166626	-0.16810879111289978	-1.2247765064239502	-0.6029819250106812	1.3269271850585938	-1.6962946653366089	3.1194348335266113	-0.03198686242103577	-3.6662840843200684	-3.046064853668213	-3.1787376403808594	-4.417981147766113	-5.475986480712891	-6.300824165344238	-8.41841983795166	-3.535203218460083
ENSG00000134186.11	-0.9414405822753906	-0.49291905760765076	0.2018788456916809	-0.28498467803001404	-1.4627294540405273	-0.3008352220058441	2.9886984825134277	-0.4753231108188629	-3.579716444015503	-2.8004133701324463	-3.3475570678710938	-4.300389289855957	-5.162324905395508	-5.9466962814331055	-7.753505706787109	-3.591693162918091
ENSG00000143107.8	0.08516092598438263	0.4090369939804077	-0.17551878094673157	-0.43191027641296387	-0.6584109663963318	0.017193377017974854	0.15951555967330933	-1.1313577890396118	-3.537580728530884	-2.6733040809631348	-3.140462875366211	-4.3695478439331055	-5.348507881164551	-5.830050468444824	-7.994477272033691	-3.569366931915283
ENSG00000116266.10	-0.315859317779541	0.18849292397499084	-0.8232511878013611	-1.5241106748580933	-2.2640273571014404	-0.955298125743866	4.0080366134643555	-0.06687727570533752	-3.3232581615448	-2.7671103477478027	-3.19712495803833	-3.8241560459136963	-5.301748275756836	-5.790302753448486	-7.554312705993652	-3.5799527168273926
[truncated: 25,317 more rows]
