# Supplementary material for: Genetic and environmental regulation of caudate nucleus transcriptome: insight into schizophrenia risk and the dopamine system
Source: medRxiv preprint, doi:10.1101/2020.11.18.20230540, version 2 (2021-04-29)
Supplement: Data S6 [file 230540_file08.gz › supplemental_data_s6/module0_genes.csv]

gene_id	gene_name
chr11:113414462-113415420(-)
chr11:113412884-113414374(-)
ENSG00000225630.1	MTND2P28
ENSG00000237973.1	MTCO1P12
ENSG00000229344.1	MTCO2P12
ENSG00000248527.1	MTATP6P1
ENSG00000198744.5	MTCO3P12
ENSG00000188290.10	HES4
ENSG00000131584.18	ACAP3
ENSG00000107404.18	DVL1
ENSG00000175756.13	AURKAIP1
ENSG00000242485.5	MRPL20
ENSG00000205090.8	TMEM240
ENSG00000160075.11	SSU72
ENSG00000228594.3	FNDC10
ENSG00000272106.1	RP11-345P4.9
ENSG00000078369.17	GNB1
ENSG00000187730.7	GABRD
ENSG00000067606.16	PRKCZ
ENSG00000157933.9	SKI
ENSG00000177133.10	LINC00982
ENSG00000158109.14	TPRG1L
ENSG00000130764.9	LRRC47
ENSG00000196581.10	AJAP1
ENSG00000069424.14	KCNAB2
ENSG00000116254.17	CHD5
ENSG00000116251.9	RPL22
ENSG00000116237.15	ICMT
ENSG00000097021.19	ACOT7
ENSG00000007923.15	DNAJC11
ENSG00000171735.18	CAMTA1
ENSG00000049245.12	VAMP3
ENSG00000116288.12	PARK7
ENSG00000142599.17	RERE
ENSG00000074800.13	ENO1
ENSG00000171603.16	CLSTN1
ENSG00000178585.14	CTNNBIP1
ENSG00000162441.11	LZIC
ENSG00000054523.17	KIF1B
ENSG00000142657.20	PGD
ENSG00000116649.9	SRM
ENSG00000198793.12	MTOR
ENSG00000116661.9	FBXO2
ENSG00000132879.13	FBXO44
ENSG00000199347.1	RNU5E-1
ENSG00000083444.16	PLOD1
ENSG00000116688.16	MFN2
ENSG00000048707.13	VPS13D
ENSG00000162496.8	DHRS3
ENSG00000116731.22	PRDM2
ENSG00000116786.11	PLEKHM2
ENSG00000233954.6	UQCRHL
ENSG00000132881.11	RSG1
ENSG00000055070.16	SZRD1
ENSG00000236698.1	EIF1AXP1
ENSG00000238142.1	RP11-108M9.4
ENSG00000159363.17	ATP13A2
ENSG00000117118.9	SDHB
ENSG00000159423.16	ALDH4A1
ENSG00000053372.4	MRTO4
ENSG00000053371.12	AKR7A2
ENSG00000077549.17	CAPZB
ENSG00000173436.13	MINOS1
ENSG00000158748.3	HTR6
ENSG00000162545.5	CAMK2N1
ENSG00000158828.6	PINK1
ENSG00000244038.9	DDOST
ENSG00000189410.11	SH2D5
ENSG00000127483.17	HP1BP3
ENSG00000075151.20	EIF4G3
ENSG00000076864.19	RAP1GAP
ENSG00000070831.15	CDC42
ENSG00000004487.15	KDM1A
ENSG00000169641.13	LUZP1
ENSG00000125944.18	HNRNPR
ENSG00000125945.14	ZNF436
ENSG00000117318.8	ID3
ENSG00000142676.12	RPL11
ENSG00000057757.9	PITHD1
ENSG00000011009.10	LYPLA2
ENSG00000189266.11	PNRC2
ENSG00000001461.16	NIPAL3
ENSG00000169504.14	CLIC4
ENSG00000117614.9	SYF2
ENSG00000183726.10	TMEM50A
ENSG00000162430.16	SEPN1
ENSG00000117640.17	MTFR1L
ENSG00000142684.8	ZNF593
ENSG00000142669.14	SH3BGRL3
ENSG00000169442.8	CD52
ENSG00000198830.10	HMGN2
ENSG00000090273.13	NUDC
ENSG00000253368.3	TRNP1
ENSG00000090020.10	SLC9A1
ENSG00000142784.15	WDTC1
ENSG00000158195.10	WASF2
ENSG00000126709.14	IFI6
ENSG00000117758.13	STX12
ENSG00000117751.17	PPP1R8
ENSG00000117748.9	RPA2
ENSG00000126698.10	DNAJC8
ENSG00000130770.17	ATPIF1
ENSG00000198492.15	YTHDF2
ENSG00000159023.19	EPB41
ENSG00000162512.15	SDC3
ENSG00000134644.15	PUM1
ENSG00000121766.15	ZCCHC17
ENSG00000121769.7	FABP3
ENSG00000162517.12	PEF1
ENSG00000121753.12	ADGRB2
ENSG00000184007.18	PTP4A2
ENSG00000121774.17	KHDRBS1
ENSG00000025800.13	KPNA6
ENSG00000084652.15	TXLNA
ENSG00000084623.11	EIF3I
ENSG00000160058.18	BSDC1
ENSG00000162521.18	RBBP4
ENSG00000134684.10	YARS
ENSG00000160097.15	FNDC5
ENSG00000121905.9	HPCA
ENSG00000116514.16	RNF19B
ENSG00000134686.17	PHC2
ENSG00000116544.11	DLGAP3
ENSG00000116560.10	SFPQ
ENSG00000146463.11	ZMYM4
ENSG00000142687.17	KIAA0319L
ENSG00000020129.15	NCDN
ENSG00000126067.11	PSMB2
ENSG00000142686.7	C1orf216
ENSG00000092847.11	AGO1
ENSG00000054116.11	TRAPPC3
ENSG00000116871.15	MAP7D1
ENSG00000054118.13	THRAP3
ENSG00000181817.5	LSM10
ENSG00000116885.18	OSCP1
ENSG00000201448.1	SNORA63
ENSG00000116898.11	MRPS15
ENSG00000163875.15	MEAF6
ENSG00000183317.16	EPHA10
ENSG00000185090.14	MANEAL
ENSG00000197982.13	C1orf122
ENSG00000183431.11	SF3A3
ENSG00000183520.11	UTP11
ENSG00000224592.5	RP5-884C9.2
ENSG00000174574.15	AKIRIN1
ENSG00000168653.10	NDUFS5
ENSG00000127603.23	MACF1
ENSG00000116983.12	HPCAL4
ENSG00000131236.16	CAP1
ENSG00000131238.16	PPT1
ENSG00000117000.8	RLF
ENSG00000259943.1	RP1-39G22.7
ENSG00000084073.8	ZMPSTE24
ENSG00000084070.11	SMAP2
ENSG00000187801.14	ZFP69B
ENSG00000117016.9	RIMS3
ENSG00000198815.8	FOXJ3
ENSG00000236876.3	TMSB4XP1
ENSG00000171960.10	PPIH
ENSG00000065978.18	YBX1
ENSG00000177868.11	SVBP
ENSG00000117395.11	EBNA1BP2
ENSG00000142949.16	PTPRF
ENSG00000066135.12	KDM4A
ENSG00000126091.19	ST3GAL3
ENSG00000117408.10	IPO13
ENSG00000132768.13	DPH2
ENSG00000117410.13	ATP6V0B
ENSG00000117411.16	B4GALT2
ENSG00000117419.14	ERI3
ENSG00000142937.11	RPS8
ENSG00000126088.13	UROD
ENSG00000117450.13	PRDX1
ENSG00000117448.13	AKR1A1
ENSG00000159592.10	GPBP1L1
ENSG00000085998.13	POMGNT1
ENSG00000171357.5	LURAP1
ENSG00000173660.11	UQCRH
ENSG00000123472.12	ATPAF1
ENSG00000159658.10	EFCAB14
ENSG00000162368.13	CMPK1
ENSG00000123091.4	RNF11
ENSG00000085832.16	EPS15
ENSG00000078618.20	NRDC
ENSG00000134717.17	BTF3L4
ENSG00000157077.14	ZFYVE9
ENSG00000162377.5	COA7
ENSG00000162378.12	ZYG11B
ENSG00000162384.13	C1orf123
ENSG00000116209.11	TMEM59
ENSG00000116221.15	MRPL37
ENSG00000162402.13	USP24
ENSG00000162407.8	PLPP3
ENSG00000177606.6	JUN
ENSG00000162599.15	NFIA
ENSG00000079739.15	PGM1
ENSG00000158966.13	CACHD1
ENSG00000162434.11	JAK1
ENSG00000162433.14	AK4
ENSG00000116675.15	DNAJC6
ENSG00000184588.17	PDE4B
ENSG00000118473.21	SGIP1
ENSG00000142864.14	SERBP1
ENSG00000172380.5	GNG12
ENSG00000116729.13	WLS
ENSG00000033122.18	LRRC7
ENSG00000116754.13	SRSF11
ENSG00000132485.13	ZRANB2
ENSG00000172260.14	NEGR1
ENSG00000178965.13	ERICH3
ENSG00000117054.13	ACADM
ENSG00000226415.1	TPI1P1
ENSG00000226084.5	RP4-706A16.3
ENSG00000154027.18	AK5
ENSG00000077254.14	USP33
ENSG00000180488.14	FAM73A
ENSG00000162616.8	DNAJB4
ENSG00000117114.19	ADGRL2
ENSG00000137941.16	TTLL7
ENSG00000142875.19	PRKACB
ENSG00000117133.10	RPF1
ENSG00000174021.10	GNG5
ENSG00000117155.16	SSX2IP
ENSG00000162642.13	C1orf52
ENSG00000153904.18	DDAH1
ENSG00000142871.16	CYR61
ENSG00000183291.15	SEP15
ENSG00000153936.16	HS2ST1
ENSG00000143013.12	LMO4
ENSG00000137947.11	GTF2B
ENSG00000197147.12	LRRC8B
ENSG00000122482.20	ZNF644
ENSG00000122406.12	RPL5
ENSG00000154511.11	FAM69A
ENSG00000137942.16	FNBP1L
ENSG00000117525.13	F3
ENSG00000117519.15	CNN3
ENSG00000137970.7	RPL7P9
ENSG00000117600.12	PLPPR4
ENSG00000156875.13	MFSD14A
ENSG00000137996.12	RTCA
ENSG00000181656.6	GPR88
ENSG00000162694.13	EXTL2
ENSG00000170989.8	S1PR1
ENSG00000183298.5	RPSAP19
ENSG00000198890.7	PRMT6
ENSG00000162639.15	HENMT1
ENSG00000121957.12	GPSM2
ENSG00000121940.15	CLCC1
ENSG00000085433.15	WDR47
ENSG00000244716.3	RP11-20O24.4
ENSG00000197780.9	TAF13
ENSG00000215717.5	TMEM167B
ENSG00000116299.16	KIAA1324
ENSG00000031698.12	SARS
ENSG00000143126.7	CELSR2
ENSG00000134243.11	SORT1
ENSG00000143106.12	PSMA5
ENSG00000181754.6	AMIGO1
ENSG00000116337.15	AMPD2
ENSG00000134184.12	GSTM1
ENSG00000134202.10	GSTM3
ENSG00000168710.17	AHCYL1
ENSG00000197106.6	SLC6A17
ENSG00000134248.13	LAMTOR5
ENSG00000177301.13	KCNA2
ENSG00000116459.10	ATP5F1
ENSG00000171385.9	KCND3
ENSG00000116489.12	CAPZA1
ENSG00000163349.21	HIPK1
ENSG00000197323.11	TRIM33
ENSG00000116752.5	BCAS2
ENSG00000009307.15	CSDE1
ENSG00000163399.15	ATP1A1
ENSG00000198162.12	MAN1A2
ENSG00000092621.11	PHGDH
ENSG00000134250.18	NOTCH2
ENSG00000277702.1	CH17-13I23.3
ENSG00000207205.1	RNVU1-15
ENSG00000186141.8	POLR3C
ENSG00000131779.10	PEX11B
ENSG00000265241.6	RBM8A
ENSG00000272031.2	ANKRD34A
ENSG00000131778.17	CHD1L
ENSG00000215861.5	WI2-1896O14.1
ENSG00000184678.10	HIST2H2BE
ENSG00000184260.5	HIST2H2AC
ENSG00000184270.4	HIST2H2AB
ENSG00000178096.8	BOLA1
ENSG00000159164.9	SV2A
ENSG00000264522.5	OTUD7B
ENSG00000136631.12	VPS45
ENSG00000143401.14	ANP32E
ENSG00000117362.12	APH1A
ENSG00000159208.15	CIART
ENSG00000266472.5	MRPS21
ENSG00000143420.17	ENSA
ENSG00000197622.12	CDC42SE1
ENSG00000213190.3	MLLT11
ENSG00000159352.15	PSMD4
ENSG00000143393.16	PI4KB
ENSG00000143416.20	SELENBP1
ENSG00000159377.10	PSMB4
ENSG00000143376.12	SNX27
ENSG00000159409.14	CELF3
ENSG00000143436.10	MRPL9
ENSG00000197747.8	S100A10
ENSG00000197956.9	S100A6
ENSG00000188643.10	S100A16
ENSG00000189171.14	S100A13
ENSG00000160678.11	S100A1
ENSG00000143553.10	SNAPIN
ENSG00000143621.16	ILF2
ENSG00000143614.9	GATAD2B
ENSG00000198837.9	DENND4B
ENSG00000143543.14	JTB
ENSG00000177954.11	RPS27
ENSG00000143549.19	TPM3
ENSG00000143612.18	C1orf43
ENSG00000143569.18	UBAP2L
ENSG00000143575.14	HAX1
ENSG00000160714.9	UBE2Q1
ENSG00000160716.5	CHRNB2
ENSG00000160710.15	ADAR
ENSG00000143603.18	KCNN3
ENSG00000163344.5	PMVK
ENSG00000163346.16	PBXIP1
ENSG00000179085.7	DPM3
ENSG00000160752.14	FDPS
ENSG00000116539.11	ASH1L
ENSG00000163374.19	YY1AP1
ENSG00000132676.15	DAP3
ENSG00000132718.8	SYT11
ENSG00000116584.17	ARHGEF2
ENSG00000163479.13	SSR2
ENSG00000160803.7	UBQLN4
ENSG00000116586.11	LAMTOR2
ENSG00000198952.8	SMG5
ENSG00000163468.14	CCT3
ENSG00000125462.16	C1orf61
ENSG00000207933.3	MIR9-1
ENSG00000116604.17	MEF2D
ENSG00000163382.11	NAXE
ENSG00000160818.16	GPATCH4
ENSG00000132692.18	BCAN
ENSG00000143314.12	MRPL24
ENSG00000143321.18	HDGF
ENSG00000132694.18	ARHGEF11
ENSG00000162706.12	CADM3
ENSG00000158716.8	DUSP23
ENSG00000177807.7	KCNJ10
ENSG00000162728.4	KCNJ9
ENSG00000162729.13	IGSF8
ENSG00000018625.14	ATP1A2
ENSG00000162734.12	PEA15
ENSG00000162735.18	PEX19
ENSG00000122218.14	COPA
ENSG00000215845.10	TSTD1
ENSG00000158773.14	USF1
ENSG00000162755.13	KLHDC9
ENSG00000143256.4	PFDN2
ENSG00000143222.11	UFC1
ENSG00000158864.12	NDUFS2
ENSG00000158882.13	TOMM40L
ENSG00000248485.1	PCP4L1
ENSG00000143252.14	SDHC
ENSG00000152332.15	UHMK1
ENSG00000117152.13	RGS4
ENSG00000143248.12	RGS5
ENSG00000143171.12	RXRG
ENSG00000143198.12	MGST3
ENSG00000143149.12	ALDH9A1
ENSG00000215952.1	MIR921
ENSG00000143157.11	POGK
ENSG00000152382.5	TADA1
ENSG00000143162.7	CREG1
ENSG00000143158.10	MPC2
ENSG00000143164.15	DCAF6
ENSG00000143155.12	TIPRL
ENSG00000143153.12	ATP1B1
ENSG00000075945.12	KIFAP3
ENSG00000197959.13	DNM3
ENSG00000117592.8	PRDX6
ENSG00000234741.7	GAS5
ENSG00000203737.3	GPR52
ENSG00000116161.17	CACYBP
ENSG00000120333.4	MRPS14
ENSG00000116147.16	TNR
ENSG00000143207.19	RFWD2
ENSG00000152092.15	ASTN1
ENSG00000075391.16	RASAL2
ENSG00000116191.17	RALGPS2
ENSG00000116199.11	FAM20B
ENSG00000143322.19	ABL2
ENSG00000135837.15	CEP350
ENSG00000143324.13	XPR1
ENSG00000135823.13	STX6
ENSG00000198216.10	CACNA1E
ENSG00000135821.17	GLUL
ENSG00000135824.12	RGS8
ENSG00000135829.16	DHX9
ENSG00000157064.10	NMNAT2
ENSG00000162704.15	ARPC5
ENSG00000143344.15	RGL1
ENSG00000116667.12	C1orf21
ENSG00000116679.15	IVNS1ABP
ENSG00000047410.13	TPR
ENSG00000116741.7	RGS2
ENSG00000116747.12	TROVE2
ENSG00000162630.5	B3GALT2
ENSG00000151414.14	NEK7
ENSG00000118200.14	CAMSAP2
ENSG00000116852.14	KIF21B
ENSG00000116857.16	TMEM9
ENSG00000159176.13	CSRP1
ENSG00000198700.9	IPO9
ENSG00000198892.6	SHISA4
ENSG00000134375.10	TIMM17A
ENSG00000170075.8	GPR37L1
ENSG00000143851.15	PTPN7
ENSG00000077152.9	UBE2T
ENSG00000143858.11	SYT2
ENSG00000183155.4	RABIF
ENSG00000117153.15	KLHL12
ENSG00000159346.12	ADIPOR1
ENSG00000163444.11	TMEM183A
ENSG00000143847.15	PPFIA4
ENSG00000058668.14	ATP2B4
ENSG00000058673.15	ZC3H11A
ENSG00000182004.12	SNRPE
ENSG00000143845.14	ETNK2
ENSG00000143850.13	PLEKHA6
ENSG00000158615.8	PPP1R15B
ENSG00000170382.11	LRRN2
ENSG00000117222.13	RBBP5
ENSG00000133059.16	DSTYK
ENSG00000133069.15	TMCC2
ENSG00000069275.12	NUCKS1
ENSG00000229509.1	RP11-421E17.4
ENSG00000123836.14	PFKFB2
ENSG00000076356.6	PLXNA2
ENSG00000008118.9	CAMK1G
ENSG00000143473.11	KCNH1
ENSG00000170385.9	SLC30A1
ENSG00000123684.12	LPGAT1
ENSG00000143493.12	INTS7
ENSG00000220749.4	RPL21P28
ENSG00000066027.11	PPP2R5A
ENSG00000117691.9	NENF
ENSG00000117697.14	NSL1
ENSG00000203705.10	TATDN3
ENSG00000174606.13	ANGEL2
ENSG00000136643.11	RPS6KC1
ENSG00000082482.13	KCNK2
ENSG00000136636.12	KCTD3
ENSG00000136628.17	EPRS
ENSG00000162813.17	BPNT1
ENSG00000067704.9	IARS2
ENSG00000118873.15	RAB3GAP2
ENSG00000218283.2	MORF4L1P1
ENSG00000162817.6	C1orf115
ENSG00000154305.16	MIA3
ENSG00000162819.11	BROX
ENSG00000143502.14	SUSD4
ENSG00000162909.17	CAPN2
ENSG00000143514.16	TP53BP2
ENSG00000143756.11	FBXO28
ENSG00000143753.12	DEGS1
ENSG00000162923.14	WDR26
ENSG00000143742.12	SRP9
ENSG00000143819.12	EPHX1
ENSG00000163041.9	H3F3A
ENSG00000182827.8	ACBD3
ENSG00000143799.12	PARP1
ENSG00000203685.9	STUM
ENSG00000143772.9	ITPKB
ENSG00000143776.18	CDC42BPA
ENSG00000143740.14	SNAP47
ENSG00000143761.14	ARF1
ENSG00000162910.18	MRPL55
ENSG00000143774.16	GUK1
ENSG00000162913.9	C1orf145
ENSG00000154358.20	OBSCN
ENSG00000162931.11	TRIM17
ENSG00000181218.5	HIST3H2A
ENSG00000196890.4	HIST3H2BB
ENSG00000168159.10	RNF187
ENSG00000234975.6	FTH1P2
ENSG00000154429.10	CCSAP
ENSG00000177614.10	PGBD5
ENSG00000135744.7	AGT
ENSG00000119280.16	C1orf198
ENSG00000173409.13	ARV1
ENSG00000135766.8	EGLN1
ENSG00000135749.18	PCNX2
ENSG00000135750.14	KCNK1
ENSG00000183780.12	SLC35F3
ENSG00000168275.14	COA6
ENSG00000168264.10	IRF2BP2
ENSG00000173726.10	TOMM20
ENSG00000207181.1	SNORA14B
ENSG00000152904.11	GGPS1
ENSG00000168243.10	GNG4
ENSG00000077585.13	GPR137B
ENSG00000116977.18	LGALS8
ENSG00000077522.12	ACTN2
ENSG00000198626.15	RYR2
ENSG00000155816.19	FMN2
ENSG00000182901.16	RGS7
ENSG00000091483.6	FH
ENSG00000143702.15	CEP170
ENSG00000054282.15	SDCCAG8
ENSG00000117020.16	AKT3
ENSG00000179456.10	ZBTB18
ENSG00000153187.17	HNRNPU
ENSG00000162851.7	TFB2M
ENSG00000162852.13	CNST
ENSG00000143653.9	SCCPDH
ENSG00000153207.14	AHCTF1
ENSG00000143727.15	ACP1
ENSG00000186487.17	MYT1L
ENSG00000237720.1	AC011995.1
ENSG00000032389.12	TSSC1
ENSG00000171865.9	RNASEH1
ENSG00000171863.12	RPS7
ENSG00000228203.6	RNF144A-AS1
ENSG00000151692.14	RNF144A
ENSG00000115738.9	ID2
ENSG00000260837.1	RP11-434B12.1
ENSG00000134313.14	KIDINS220
ENSG00000151693.9	ASAP2
ENSG00000119185.12	ITGB1BP1
ENSG00000119203.13	CPSF3
ENSG00000134308.13	YWHAQ
ENSG00000115758.12	ODC1
ENSG00000143870.12	PDIA6
ENSG00000162975.4	KCNF1
ENSG00000134318.13	ROCK2
ENSG00000169006.6	NTSR2
ENSG00000134324.11	LPIN1
ENSG00000162981.13	FAM84A
ENSG00000151779.12	NBAS
ENSG00000079785.14	DDX1
ENSG00000197872.11	FAM49A
ENSG00000163032.11	VSNL1
ENSG00000240857.1	RDH14
ENSG00000068697.6	LAPTM4A
ENSG00000055917.15	PUM2
ENSG00000143878.9	RHOB
ENSG00000119782.13	FKBP1B
ENSG00000115128.6	SF3B6
ENSG00000084676.15	NCOA1
ENSG00000184924.5	PTRHD1
ENSG00000138031.14	ADCY3
ENSG00000115137.11	DNAJC27
ENSG00000084710.13	EFR3B
ENSG00000084731.14	KIF3C
ENSG00000084733.10	RAB10
ENSG00000084754.10	HADHA
ENSG00000138029.13	HADHB
ENSG00000138018.17	EPT1
ENSG00000115155.16	OTOF
ENSG00000213699.8	SLC35F6
ENSG00000157851.16	DPYSL5
ENSG00000084764.10	MAPRE3
ENSG00000228474.5	OST4
ENSG00000138028.14	CGREF1
ENSG00000138085.16	ATRAID
ENSG00000115234.10	SNX17
ENSG00000115226.9	FNDC4
ENSG00000119760.15	SUPT7L
ENSG00000163798.13	SLC4A1AP
ENSG00000243147.7	MRPL33
ENSG00000075426.11	FOSL2
ENSG00000213639.9	PPP1CB
ENSG00000115295.19	CLIP4
ENSG00000119801.12	YPEL5
ENSG00000013016.15	EHD3
ENSG00000119820.10	YIPF4
ENSG00000115760.13	BIRC6
ENSG00000260025.1	RP11-490M8.1
ENSG00000150938.9	CRIM1
ENSG00000279519.1	RP11-288C18.1
ENSG00000115808.11	STRN
ENSG00000008869.11	HEATR5B
ENSG00000152133.14	GPATCH11
ENSG00000055332.16	EIF2AK2
ENSG00000218739.9	CEBPZOS
ENSG00000115816.14	CEBPZ
ENSG00000119787.13	ATL2
ENSG00000213553.4	RPLP0P6
ENSG00000115875.18	SRSF7
ENSG00000188010.12	MORN2
ENSG00000183023.18	SLC8A1
ENSG00000115944.14	COX7A2L
ENSG00000057935.13	MTA3
ENSG00000138095.18	LRPPRC
ENSG00000138032.20	PPM1B
ENSG00000138078.15	PREPL
ENSG00000138083.4	SIX3
ENSG00000171132.13	PRKCE
ENSG00000116016.13	EPAS1
ENSG00000119729.11	RHOQ
ENSG00000119878.5	CRIPT
ENSG00000171150.7	SOCS5
ENSG00000180398.11	MCFD2
ENSG00000143933.16	CALM2
ENSG00000236824.2	BCYRN1
ENSG00000095002.13	MSH2
ENSG00000138081.20	FBXO11
ENSG00000162869.15	PPP1R21
ENSG00000179915.22	NRXN1
ENSG00000068912.13	ERLEC1
ENSG00000265452.1	MIR3682
ENSG00000119737.5	GPR75
ENSG00000170634.12	ACYP2
ENSG00000115306.15	SPTBN1
ENSG00000115310.17	RTN4
ENSG00000143947.12	RPS27A
ENSG00000085760.14	MTIF2
ENSG00000115355.15	CCDC88A
ENSG00000163001.11	CFAP36
ENSG00000115380.19	EFEMP1
ENSG00000115392.11	FANCL
ENSG00000233426.3	EIF3FP3
ENSG00000119866.20	BCL11A
ENSG00000115464.14	USP34
ENSG00000115484.14	CCT4
ENSG00000173163.10	COMMD1
ENSG00000170340.10	B3GNT2
ENSG00000115504.14	EHBP1
ENSG00000014641.17	MDH1
ENSG00000169764.14	UGP2
ENSG00000197329.11	PELI1
ENSG00000119862.12	LGALSL
ENSG00000119844.15	AFTPH
ENSG00000115902.10	SLC1A4
ENSG00000138069.16	RAB1A
ENSG00000172974.11	AC007318.5
ENSG00000138071.13	ACTR2
ENSG00000197223.11	C1D
ENSG00000115946.7	PNO1
ENSG00000221823.10	PPP3R1
ENSG00000169604.19	ANTXR1
ENSG00000169599.12	NFU1
ENSG00000115977.18	AAK1
ENSG00000124380.10	SNRNP27
ENSG00000169564.6	PCBP1
ENSG00000116005.11	PCYOX1
ENSG00000143977.13	SNRPG
ENSG00000035141.7	FAM136A
ENSG00000075340.22	ADD2
ENSG00000075292.18	ZNF638
ENSG00000144036.15	EXOC6B
ENSG00000144040.12	SFXN5
ENSG00000135631.16	RAB11FIP5
ENSG00000135617.3	PRADC1
ENSG00000135624.15	CCT7
ENSG00000163013.11	FBXO41
ENSG00000116127.17	ALMS1
ENSG00000114956.19	DGUOK
ENSG00000163170.11	BOLA3
ENSG00000225439.2	BOLA3-AS1
ENSG00000204843.12	DCTN1
ENSG00000115307.16	AUP1
ENSG00000115350.11	POLE4
ENSG00000176204.13	LRRTM4
ENSG00000066032.18	CTNNA2
ENSG00000162951.10	LRRTM1
ENSG00000163541.11	SUCLG1
ENSG00000034510.5	TMSB10
ENSG00000152291.13	TGOLN2
ENSG00000042445.13	RETSAT
ENSG00000168906.12	MAT2A
ENSG00000168894.9	RNF181
ENSG00000115525.16	ST3GAL5
ENSG00000132305.20	IMMT
ENSG00000132313.14	MRPL35
ENSG00000068615.17	REEP1
ENSG00000115561.15	CHMP3
ENSG00000153561.12	RMND5A
ENSG00000084090.13	STARD7
ENSG00000144021.2	CIAO1
ENSG00000144028.14	SNRNP200
ENSG00000135940.6	COX5B
ENSG00000115073.7	ACTR1B
ENSG00000040933.15	INPP4A
ENSG00000183513.8	COA5
ENSG00000115446.11	UNC50
ENSG00000071073.12	MGAT4A
ENSG00000196872.11	KIAA1211L
ENSG00000185414.19	MRPL30
ENSG00000170500.12	LONRF2
ENSG00000170485.16	NPAS2
ENSG00000071082.10	RPL31
ENSG00000198914.3	POU3F3
ENSG00000135972.8	MRPS9
ENSG00000135968.20	GCC2
ENSG00000153201.15	RANBP2
ENSG00000175701.10	LINC00116
ENSG00000153208.16	MERTK
ENSG00000114999.7	TTL
ENSG00000115091.11	ACTR3
ENSG00000155368.16	DBI
ENSG00000088179.8	PTPN4
ENSG00000115109.13	EPB41L5
ENSG00000144118.13	RALB
ENSG00000074054.17	CLASP1
ENSG00000155438.11	NIFK
ENSG00000211460.11	TSN
ENSG00000155052.14	CNTNAP5
ENSG00000163166.14	IWS1
ENSG00000136720.6	HS6ST1
ENSG00000152082.13	MZT2B
ENSG00000136710.9	CCDC115
ENSG00000136718.9	IMP4
ENSG00000178171.10	AMER3
ENSG00000136002.17	ARHGEF4
ENSG00000152102.17	FAM168B
ENSG00000115762.16	PLEKHB2
ENSG00000274353.1	RP11-788A1.1
ENSG00000150551.10	LYPD1
ENSG00000152127.8	MGAT5
ENSG00000115839.17	RAB3GAP1
ENSG00000048991.16	R3HDM1
ENSG00000144224.16	UBXN4
ENSG00000115866.10	DARS
ENSG00000168702.17	LRP1B
ENSG00000168280.16	KIF5C
ENSG00000168288.12	MMADHC
ENSG00000080345.17	RIF1
ENSG00000157827.19	FMNL2
ENSG00000144278.14	GALNT13
ENSG00000115159.15	GPD2
ENSG00000123612.15	ACVR1C
ENSG00000144283.21	PKP4
ENSG00000213189.5	BTF3L4P2
ENSG00000136536.14	MARCH7
ENSG00000115233.11	PSMD14
ENSG00000232320.6	AC009299.5
ENSG00000144290.16	SLC4A10
ENSG00000153253.15	SCN3A
ENSG00000136531.14	SCN2A
ENSG00000178662.15	CSRNP3
ENSG00000144285.16	SCN1A
ENSG00000172318.5	B3GALT1
ENSG00000198648.10	STK39
ENSG00000172292.14	CERS6
ENSG00000138398.15	PPIG
ENSG00000138385.15	SSB
ENSG00000144357.16	UBR3
ENSG00000128683.13	GAD1
ENSG00000198586.13	TLK1
ENSG00000123600.18	METTL8
ENSG00000233762.3	AC007969.5
ENSG00000071967.11	CYBRD1
ENSG00000077380.15	DYNC1I2
ENSG00000115840.13	SLC25A12
ENSG00000091428.17	RAPGEF4
ENSG00000138430.15	OLA1
ENSG00000163328.13	GPR155
ENSG00000128656.13	CHN1
ENSG00000115966.16	ATF2
ENSG00000154518.9	ATP5G3
ENSG00000128654.13	MTX2
ENSG00000170144.19	HNRNPA3
ENSG00000116044.15	NFE2L2
ENSG00000180228.12	PRKRA
ENSG00000187231.13	SESTD1
ENSG00000144331.18	ZNF385B
ENSG00000138434.16	SSFA2
ENSG00000061676.14	NCKAP1
ENSG00000065548.17	ZC3H15
ENSG00000138448.11	ITGAV
ENSG00000144369.12	FAM171B
ENSG00000138381.9	ASNSD1
ENSG00000115419.12	GLS
ENSG00000115415.18	STAT1
ENSG00000196950.13	SLC39A10
ENSG00000138411.10	HECW2
ENSG00000197121.14	PGAP1
ENSG00000115524.15	SF3B1
ENSG00000115520.8	COQ10B
ENSG00000144381.16	HSPD1
ENSG00000162944.10	RFTN2
ENSG00000082153.17	BZW1
ENSG00000196290.14	NIF3L1
ENSG00000155744.9	FAM126B
ENSG00000119013.8	NDUFB3
ENSG00000115993.12	TRAK2
ENSG00000116030.16	SUMO1
ENSG00000204217.12	BMPR2
ENSG00000138442.9	WDR12
ENSG00000138443.15	ABI2
ENSG00000023228.13	NDUFS1
ENSG00000114942.13	EEF1B2
ENSG00000204186.7	ZDBF2
ENSG00000114948.12	ADAM23
ENSG00000229321.1	AC008269.2
ENSG00000188674.10	C2orf80
ENSG00000115020.16	PIKFYVE
ENSG00000078018.19	MAP2
ENSG00000144406.18	UNC80
ENSG00000197713.14	RPE
ENSG00000115365.11	LANCL1
ENSG00000178568.14	ERBB4
ENSG00000079246.15	XRCC5
ENSG00000279348.1	RP11-566E18.1
ENSG00000260804.3	PKI55
ENSG00000144583.4	MARCH4
ENSG00000197756.9	RPL37A
ENSG00000115461.4	IGFBP5
ENSG00000278951.1	AC007557.5
ENSG00000079308.16	TNS1
ENSG00000163466.15	ARPC2
ENSG00000127837.9	AAMP
ENSG00000127838.13	PNKD
ENSG00000171450.5	CDK5R2
ENSG00000144567.10	FAM134A
ENSG00000198925.10	ATG9A
ENSG00000115661.13	STK16
ENSG00000127824.13	TUBA4A
ENSG00000135924.15	DNAJB2
ENSG00000054356.13	PTPRN
ENSG00000182698.11	RESP18
ENSG00000114923.16	SLC4A3
ENSG00000116106.11	EPHA4
ENSG00000163082.9	SGPP2
ENSG00000116120.9	FARSB
ENSG00000123983.13	ACSL3
ENSG00000171951.4	SCG2
ENSG00000135900.3	MRPL44
ENSG00000135919.12	SERPINE2
ENSG00000144460.12	NYAP2
ENSG00000168958.19	MFF
ENSG00000173744.17	AGFG1
ENSG00000187957.7	DNER
ENSG00000153827.13	TRIP12
ENSG00000163053.10	SLC16A14
ENSG00000135932.10	CAB39
ENSG00000135916.15	ITM2C
ENSG00000232520.1	AC012507.3
ENSG00000230385.1	AC012507.4
ENSG00000204128.5	C2orf72
ENSG00000173692.12	PSMD1
ENSG00000135931.17	ARMC9
ENSG00000115053.15	NCL
ENSG00000187514.15	PTMA
ENSG00000156973.13	PDE6D
ENSG00000135930.13	EIF4E2
ENSG00000204120.14	GIGYF2
ENSG00000066248.14	NGEF
ENSG00000085978.21	ATG16L1
ENSG00000252010.1	SCARNA5
ENSG00000251791.1	SCARNA6
ENSG00000157985.18	AGAP1
ENSG00000198612.10	COPS8
ENSG00000132329.10	RAMP1
ENSG00000065802.11	ASB1
ENSG00000130414.11	NDUFA10
ENSG00000172428.10	COPS9
ENSG00000063660.8	GPC1
ENSG00000130294.14	KIF1A
ENSG00000115687.13	PASK
ENSG00000115685.14	PPP1R7
ENSG00000115677.16	HDLBP
ENSG00000168385.17	SEPT2
ENSG00000115694.14	STK25
ENSG00000176946.11	THAP4
ENSG00000188011.5	RTP5
ENSG00000134121.9	CHL1
ENSG00000113851.13	CRBN
ENSG00000175928.5	LRRN1
ENSG00000150995.18	ITPR1
ENSG00000134107.4	BHLHE40
ENSG00000134108.12	ARL8B
ENSG00000156959.8	LHFPL4
ENSG00000134072.10	CAMK1
ENSG00000171148.13	TADA3
ENSG00000241553.12	ARPC4
ENSG00000163703.17	CRELD1
ENSG00000163704.11	PRRT3
ENSG00000125037.12	EMC3
ENSG00000254999.3	BRK1
ENSG00000134086.7	VHL
ENSG00000157020.17	SEC13
ENSG00000157087.16	ATP2B2
ENSG00000157103.10	SLC6A1
ENSG00000157152.16	SYN2
ENSG00000075975.15	MKRN2
ENSG00000144713.12	RPL32
ENSG00000144711.13	IQSEC1
ENSG00000163517.14	HDAC11
ENSG00000163528.12	CHCHD4
ENSG00000170860.3	LSM3
ENSG00000225733.5	FGD5-AS1
ENSG00000177463.15	NR2C2
ENSG00000131381.12	RBSN
ENSG00000131370.15	SH3BP5
ENSG00000144597.13	EAF1
ENSG00000154822.16	PLCL2
ENSG00000131374.14	TBC1D5
ENSG00000144566.10	RAB5A
ENSG00000114166.7	KAT2B
ENSG00000132967.9	HMGB1P5
ENSG00000170142.11	UBE2E1
ENSG00000197885.10	NKIRAS1
ENSG00000174748.18	RPL15
ENSG00000174738.12	NR1D2
ENSG00000151090.17	THRB
ENSG00000237838.1	AC133680.1
ENSG00000077092.18	RARB
ENSG00000077097.14	TOP2B
ENSG00000033867.16	SLC4A7
ENSG00000163512.13	AZI2
ENSG00000163527.9	STT3B
ENSG00000152642.10	GPD1L
ENSG00000144635.8	DYNC1LI1
ENSG00000170275.14	CRTAP
ENSG00000163539.16	CLASP2
ENSG00000172995.16	ARPP21
ENSG00000163673.7	DCLK3
ENSG00000178567.7	EPM2AIP1
ENSG00000144674.16	GOLGA4
ENSG00000114742.13	WDR48
ENSG00000144659.10	SLC25A38
ENSG00000168028.13	RPSA
ENSG00000114784.3	EIF1B
ENSG00000168032.8	ENTPD3
ENSG00000188846.13	RPL14
ENSG00000234287.1	RP11-761N21.2
ENSG00000168036.16	CTNNB1
ENSG00000008324.10	SS18L2
ENSG00000114853.13	ZBTB47
ENSG00000181061.13	HIGD1A
ENSG00000144647.5	POMGNT2
ENSG00000207954.1	MIR138-1
ENSG00000249992.1	TMEM158
ENSG00000011376.9	LARS2
ENSG00000181555.19	SETD2
ENSG00000114650.18	SCAP
ENSG00000163832.15	ELP6
ENSG00000114646.9	CSPG5
ENSG00000173473.10	SMARCC1
ENSG00000132153.14	DHX30
ENSG00000047849.21	MAP4
ENSG00000232112.3	TMA7
ENSG00000164054.15	SHISA5
ENSG00000010256.10	UQCRC1
ENSG00000008300.15	CELSR3
ENSG00000213672.7	NCKIPSD
ENSG00000178252.17	WDR6
ENSG00000178035.11	IMPDH2
ENSG00000198218.10	QRICH1
ENSG00000172053.16	QARS
ENSG00000114316.12	USP4
ENSG00000233276.3	GPX1
ENSG00000067560.10	RHOA
ENSG00000145022.4	TCTA
ENSG00000164061.4	BSN
ENSG00000164062.12	APEH
ENSG00000176095.11	IP6K1
ENSG00000164076.16	CAMKV
ENSG00000114353.16	GNAI2
ENSG00000114383.9	TUSC2
ENSG00000007402.11	CACNA2D2
ENSG00000088543.14	C3orf18
ENSG00000088538.12	DOCK3
ENSG00000162244.10	RPL29
ENSG00000023330.14	ALAS1
ENSG00000247596.8	TWF2
ENSG00000164091.11	WDR82
ENSG00000163930.9	BAP1
ENSG00000010322.15	NISCH
ENSG00000163938.16	GNL3
ENSG00000114902.13	SPCS1
ENSG00000163932.13	PRKCD
ENSG00000163931.15	TKT
ENSG00000113812.13	ACTR8
ENSG00000113811.10	SELK
ENSG00000157445.14	CACNA2D3
ENSG00000163946.13	FAM208A
ENSG00000163947.11	ARHGEF3
ENSG00000157500.10	APPL1
ENSG00000168374.10	ARF4
ENSG00000163681.14	SLMAP
ENSG00000168291.12	PDHB
ENSG00000168309.16	FAM107A
ENSG00000114405.10	C3orf14
ENSG00000163618.17	CADPS
ENSG00000163630.10	SYNPR
ENSG00000163634.11	THOC7
ENSG00000163637.11	PRICKLE2
ENSG00000144741.17	SLC25A26
ENSG00000144749.13	LRIG1
ENSG00000144744.16	UBA3
ENSG00000144746.6	ARL6IP5
ENSG00000114861.18	FOXP1
ENSG00000163412.12	EIF4E3
ENSG00000170837.2	GPR27
ENSG00000185008.17	ROBO2
ENSG00000169855.19	ROBO1
ENSG00000175161.13	CADM2
ENSG00000083937.8	CHMP2B
ENSG00000163320.10	CGGBP1
ENSG00000080224.17	EPHA6
ENSG00000261292.2	RP11-389G6.3
ENSG00000113966.9	ARL6
ENSG00000080200.9	CRYBG3
ENSG00000154174.7	TOMM70
ENSG00000206535.7	LNP1
ENSG00000174173.6	TRMT10C
ENSG00000081154.11	PCNP
ENSG00000242299.1	RP11-234A1.1
ENSG00000066422.4	ZBTB11
ENSG00000114391.12	RPL24
ENSG00000144815.15	NXPE3
ENSG00000170017.12	ALCAM
ENSG00000114439.18	BBX
ENSG00000196776.14	CD47
ENSG00000198919.12	DZIP3
ENSG00000144827.8	ABHD10
ENSG00000144834.13	TAGLN3
ENSG00000091972.18	CD200
ENSG00000144848.10	ATG3
ENSG00000138459.8	SLC35A5
ENSG00000241529.3	RN7SL767P
ENSG00000121579.12	NAA50
ENSG00000114573.9	ATP6V1A
ENSG00000172020.12	GAP43
ENSG00000185565.11	LSAMP
ENSG00000239268.2	RP11-384F7.2
ENSG00000144847.12	IGSF11
ENSG00000113845.9	TIMMDC1
ENSG00000138495.6	COX17
ENSG00000082701.14	GSK3B
ENSG00000065518.7	NDUFB4
ENSG00000145087.12	STXBP5L
ENSG00000173230.15	GOLGB1
ENSG00000163406.10	SLC15A2
ENSG00000114023.15	FAM162A
ENSG00000173175.14	ADCY5
ENSG00000206527.9	HACD2
ENSG00000160145.15	KALRN
ENSG00000163848.19	ZNF148
ENSG00000114520.10	SNX4
ENSG00000114544.16	SLC41A3
ENSG00000159685.10	CHCHD6
ENSG00000114631.10	PODXL2
ENSG00000074416.13	MGLL
ENSG00000058262.9	SEC61A1
ENSG00000163902.11	RPN1
ENSG00000075785.12	RAB7A
ENSG00000169714.16	CNBP
ENSG00000181789.14	COPG1
ENSG00000183624.13	HMCES
ENSG00000184897.5	H1FX
ENSG00000172765.16	TMCC1
ENSG00000253540.5	FAM86HP
ENSG00000196455.7	PIK3R4
ENSG00000017260.19	ATP2C1
ENSG00000198585.11	NUDT16
ENSG00000114686.8	MRPL3
ENSG00000091527.15	CDV3
ENSG00000144867.11	SRPRB
ENSG00000154917.10	RAB6B
ENSG00000129055.12	ANAPC13
ENSG00000158186.12	MRAS
ENSG00000051382.8	PIK3CB
ENSG00000184432.9	COPB2
ENSG00000177311.11	ZBTB38
ENSG00000114125.13	RNF7
ENSG00000069849.10	ATP1B3
ENSG00000082996.19	RNF13
ENSG00000070087.13	PFN2
ENSG00000120742.10	SERP1
ENSG00000144895.11	EIF2A
ENSG00000198843.12	SELT
ENSG00000152601.17	MBNL1
ENSG00000169860.6	P2RY1
ENSG00000114790.12	ARHGEF26
ENSG00000174948.5	GPR149
ENSG00000196549.10	MME
ENSG00000240045.1	RP11-451G4.2
ENSG00000163655.15	GMPS
ENSG00000169282.17	KCNAB1
ENSG00000114850.6	SSR3
ENSG00000174891.12	RSRC1
ENSG00000178053.17	MLF1
ENSG00000186432.8	KPNA4
ENSG00000238741.1	SCARNA7
ENSG00000169255.13	B3GALNT1
ENSG00000234851.4	RPL23AP42
ENSG00000121871.3	SLITRK3
ENSG00000114209.14	PDCD10
ENSG00000163536.12	SERPINI1
ENSG00000173905.8	GOLIM4
ENSG00000008952.16	SEC62
ENSG00000163558.12	PRKCI
ENSG00000136603.13	SKIL
ENSG00000013293.5	SLC7A14
ENSG00000154310.16	TNIK
ENSG00000144959.9	NCEH1
ENSG00000177565.16	TBL1XR1
ENSG00000172667.10	ZMAT3
ENSG00000136522.13	MRPL47
ENSG00000136521.12	NDUFB5
ENSG00000205981.6	DNAJC19
ENSG00000181449.3	SOX2
ENSG00000240024.5	LINC00888
ENSG00000114796.15	KLHL24
ENSG00000175193.12	PARL
ENSG00000114770.16	ABCC5
ENSG00000161203.13	AP2M1
ENSG00000145198.14	VWA5B2
ENSG00000145194.17	ECE2
ENSG00000163888.3	CAMK2N2
ENSG00000175166.16	PSMD2
ENSG00000114867.20	EIF4G1
ENSG00000175182.13	FAM131A
ENSG00000177383.4	MAGEF1
ENSG00000187068.2	C3orf70
ENSG00000229638.1	RPL4P4
ENSG00000163904.12	SENP2
ENSG00000244405.7	ETV5
ENSG00000156976.15	EIF4A2
ENSG00000157005.3	SST
ENSG00000114279.13	FGF12
ENSG00000127249.14	ATP13A4
ENSG00000198836.8	OPA1
ENSG00000133657.14	ATP13A3
ENSG00000145014.17	TMEM44
ENSG00000229325.1	ACAP2-IT1
ENSG00000184203.7	PPP1R2
ENSG00000061938.16	TNK2
ENSG00000174013.7	FBXO45
ENSG00000180370.10	PAK2
ENSG00000119231.10	SENP5
ENSG00000114503.10	NCBP2
ENSG00000270170.1	NCBP2-AS2
ENSG00000075711.20	DLG1
ENSG00000145016.14	RUBCN
ENSG00000122068.12	FYTTD1
ENSG00000182899.14	RPL35A
ENSG00000273238.1	RP11-1263C18.1
ENSG00000283183.1	RP11-1263C18.2
ENSG00000169020.9	ATP5I
ENSG00000168993.14	CPLX1
ENSG00000159692.15	CTBP1
ENSG00000163950.12	SLBP
ENSG00000168936.10	TMEM129
ENSG00000068078.17	FGFR3
ENSG00000185818.7	NAT8L
ENSG00000087274.16	ADD1
ENSG00000197386.10	HTT
ENSG00000163956.10	LRPAP1
ENSG00000250986.1	AC141928.1
ENSG00000184160.7	ADRA2C
ENSG00000168824.14	NSG1
ENSG00000072832.14	CRMP1
ENSG00000181215.13	C4orf50
ENSG00000152969.17	JAKMIP1
ENSG00000109501.13	WFS1
ENSG00000074211.13	PPP2R2C
ENSG00000013288.8	MAN2B2
ENSG00000179010.14	MRFAP1
ENSG00000251580.1	RP11-539L10.3
ENSG00000170846.16	AC093323.3
ENSG00000178988.10	MRFAP1L1
ENSG00000170871.11	KIAA0232
ENSG00000132405.18	TBC1D14
ENSG00000163995.19	ABLIM2
ENSG00000137449.15	CPEB2
ENSG00000118564.14	FBXL5
ENSG00000237765.6	FAM200B
ENSG00000169744.12	LDB2
ENSG00000151552.11	QDPR
ENSG00000002549.12	LAP3
ENSG00000145147.19	SLIT2
ENSG00000185774.14	KCNIP4
ENSG00000152990.13	ADGRA3
ENSG00000109606.12	DHX15
ENSG00000168214.20	RBPJ
ENSG00000169851.15	PCDH7
ENSG00000047365.11	ARAP2
ENSG00000109790.16	KLHL5
ENSG00000163682.15	RPL9
ENSG00000163683.11	SMIM14
ENSG00000078140.13	UBE2K
ENSG00000154277.12	UCHL1
ENSG00000064042.17	LIMCH1
ENSG00000109133.12	TMEM33
ENSG00000014824.13	SLC30A9
ENSG00000124406.16	ATP8A1
ENSG00000183783.6	KCTD8
ENSG00000151806.13	GUF1
ENSG00000163285.7	GABRG1
ENSG00000260878.1	RP11-320H14.1
ENSG00000151834.15	GABRA2
ENSG00000109158.10	GABRA4
ENSG00000163288.13	GABRB1
ENSG00000260918.1	RP11-731J8.2
ENSG00000169019.10	COMMD8
ENSG00000109180.14	OCIAD1
ENSG00000145247.11	OCIAD2
ENSG00000109184.14	DCUN1D4
ENSG00000163069.12	SGCB
ENSG00000109189.12	USP46
ENSG00000226950.6	DANCR
ENSG00000072201.13	LNX1
ENSG00000174780.15	SRP72
ENSG00000084092.6	NOA1
ENSG00000047315.14	POLR2B
ENSG00000163453.11	IGFBP7
ENSG00000150471.16	ADGRL3
ENSG00000083896.12	YTHDC1
ENSG00000132467.3	UTP3
ENSG00000018189.12	RUFY3
ENSG00000132463.13	GRSF1
ENSG00000156136.9	DCK
ENSG00000080493.14	SLC4A4
ENSG00000132466.17	ANKRD17
ENSG00000169116.11	PARM1
ENSG00000138769.10	CDKL2
ENSG00000138757.14	G3BP2
ENSG00000138768.14	USO1
ENSG00000198301.11	SDAD1
ENSG00000138760.8	SCARB2
ENSG00000138758.11	SEPT11
ENSG00000118816.9	CCNI
ENSG00000169288.17	MRPL1
ENSG00000138756.17	BMP2K
ENSG00000138670.17	RASGEF1B
ENSG00000273156.1	RP11-127B20.2
ENSG00000138668.18	HNRNPD
ENSG00000152795.17	HNRNPDL
ENSG00000145293.15	ENOPH1
ENSG00000145284.11	SCD5
ENSG00000138663.8	COPS4
ENSG00000163319.10	MRPS18C
ENSG00000163624.5	CDS1
ENSG00000163625.15	WDFY3
ENSG00000261496.1	RP13-514E23.1
ENSG00000109339.18	MAPK10
ENSG00000163629.12	PTPN13
ENSG00000152583.12	SPARCL1
ENSG00000163644.14	PPM1K
ENSG00000145337.4	PYURF
ENSG00000138641.15	HERC3
ENSG00000177432.6	NAP1L5
ENSG00000185477.4	GPRIN3
ENSG00000145335.15	SNCA
ENSG00000187653.11	TMSB4XP8
ENSG00000163110.14	PDLIM5
ENSG00000138696.10	BMPR1B
ENSG00000138698.14	RAP1GDS1
ENSG00000164024.11	METAP1
ENSG00000197894.10	ADH5
ENSG00000109270.12	LAMTOR3
ENSG00000164031.16	DNAJB14
ENSG00000164032.11	H2AFZ
ENSG00000145358.6	DDIT4L
ENSG00000138814.16	PPP3CA
ENSG00000254531.1	FLJ20021
ENSG00000109332.19	UBE2D3
ENSG00000145354.9	CISD2
ENSG00000138801.8	PAPSS1
ENSG00000109475.16	RPL34
ENSG00000198856.12	OSTC
ENSG00000164089.8	ETNPPL
ENSG00000188517.14	COL25A1
ENSG00000138802.11	SEC24B
ENSG00000138660.11	AP1AR
ENSG00000241741.1	RPL7AP30
ENSG00000145362.17	ANK2
ENSG00000196656.7	AC004057.1
ENSG00000174599.5	TRAM1L1
ENSG00000164100.8	NDST3
ENSG00000269893.6	SNHG8
ENSG00000164096.12	C4orf3
ENSG00000164111.14	ANXA5
ENSG00000138688.15	KIAA1109
ENSG00000138685.12	FGF2
ENSG00000151458.11	ANKRD50
ENSG00000244021.4	RP11-50D9.1
ENSG00000164040.16	PGRMC2
ENSG00000138650.8	PCDH10
ENSG00000151012.13	SLC7A11
ENSG00000109390.11	NDUFC1
ENSG00000153130.17	SCOC
ENSG00000109436.7	TBC1D9
ENSG00000170153.10	RNF150
ENSG00000153147.5	SMARCA5
ENSG00000164164.15	OTUD4
ENSG00000251333.3	RTN3P1
ENSG00000170390.15	DCLK2
ENSG00000198589.10	LRBA
ENSG00000145425.9	RPS3A
ENSG00000109670.13	FBXW7
ENSG00000137460.8	FHDC1
ENSG00000109654.14	TRIM2
ENSG00000171566.11	PLRG1
ENSG00000164114.18	MAP9
ENSG00000164116.16	GUCY1A3
ENSG00000260244.1	RP11-588K22.2
ENSG00000061918.12	GUCY1B3
ENSG00000109738.10	GLRB
ENSG00000120251.18	GRIA2
ENSG00000164125.15	FAM198B
ENSG00000109756.8	RAPGEF2
ENSG00000168843.13	FSTL5
ENSG00000164128.6	NPY1R
ENSG00000109466.13	KLHL2
ENSG00000052802.12	MSMO1
ENSG00000109472.13	CPE
ENSG00000196104.10	SPOCK3
ENSG00000154447.14	SH3RF1
ENSG00000109572.13	CLCN3
ENSG00000056050.6	HPF1
ENSG00000198948.11	MFAP3L
ENSG00000164105.3	SAP30
ENSG00000150625.16	GPM6A
ENSG00000150627.15	WDR17
ENSG00000129128.12	SPCS3
ENSG00000218336.8	TENM3
ENSG00000173320.10	STOX2
ENSG00000151726.13	ACSL1
ENSG00000151729.10	SLC25A4
ENSG00000109762.15	SNX25
ENSG00000109775.10	UFSP2
ENSG00000154556.17	SORBS2
ENSG00000109794.13	FAM149A
ENSG00000083857.13	FAT1
ENSG00000109536.11	FRG1
ENSG00000073578.16	SDHA
ENSG00000249915.7	PDCD6
ENSG00000171368.11	TPPP
ENSG00000171421.12	MRPL36
ENSG00000145494.11	NDUFS6
ENSG00000145545.11	SRD5A1
ENSG00000150753.11	CCT5
ENSG00000145495.14	MARCH6
ENSG00000164236.11	ANKRD33B
ENSG00000112977.15	DAP
ENSG00000169862.18	CTNND2
ENSG00000038382.17	TRIO
ENSG00000154122.12	ANKH
ENSG00000173545.4	ZNF622
ENSG00000145555.14	MYO10
ENSG00000176788.8	BASP1
ENSG00000113361.12	CDH6
ENSG00000113360.16	DROSHA
ENSG00000133401.15	PDZD2
ENSG00000113384.13	GOLPH3
ENSG00000150712.10	MTMR12
ENSG00000056097.15	ZFR
ENSG00000113387.11	SUB1
ENSG00000240376.1	RP11-36C20.1
ENSG00000113456.18	RAD1
ENSG00000164187.6	LMBRD2
ENSG00000152620.12	NADK2
ENSG00000164188.8	RANBP3L
ENSG00000079215.13	SLC1A3
ENSG00000164190.16	NIPBL
ENSG00000197603.13	C5orf42
ENSG00000113594.9	LIFR
ENSG00000113638.13	TTC33
ENSG00000145592.13	RPL37
ENSG00000083720.12	OXCT1
ENSG00000112972.14	HMGCS1
ENSG00000172239.13	PAIP1
ENSG00000112992.16	NNT
ENSG00000112996.10	MRPS30
ENSG00000272335.1	RP11-53O19.3
ENSG00000152684.10	PELO
ENSG00000164172.18	MOCS2
ENSG00000164258.11	NDUFS4
ENSG00000067113.16	PLPP1
ENSG00000134352.19	IL6ST
ENSG00000264281.3	CTD-2031P19.4
ENSG00000226221.1	RPL26P19
ENSG00000062194.15	GPBP1
ENSG00000145632.14	PLK2
ENSG00000152932.7	RAB3C
ENSG00000164182.10	NDUFAF2
ENSG00000130449.5	ZSWIM6
ENSG00000068796.16	KIF2A
ENSG00000186479.4	RGS7BP
ENSG00000153015.15	CWC27
ENSG00000113595.14	TRIM23
ENSG00000197860.9	SGTB
ENSG00000112851.14	ERBIN
ENSG00000145675.14	PIK3R1
ENSG00000134056.11	MRPS36
ENSG00000134058.10	CDK7
ENSG00000085231.13	AK6
ENSG00000273841.4	TAF9
ENSG00000253816.3	RP11-1415C14.3
ENSG00000145734.18	BDP1
ENSG00000131711.14	MAP1B
ENSG00000113048.16	MRPS27
ENSG00000083312.17	TNPO1
ENSG00000145741.15	BTF3
ENSG00000171617.13	ENC1
ENSG00000049860.13	HEXB
ENSG00000164347.17	GFM2
ENSG00000164346.9	NSA2
ENSG00000198780.11	FAM169A
ENSG00000113161.15	HMGCR
ENSG00000113163.15	COL4A3BP
ENSG00000122012.13	SV2C
ENSG00000164252.12	AGGF1
ENSG00000113231.13	PDE8B
ENSG00000171530.13	TBCA
ENSG00000085365.17	SCAMP1
ENSG00000152413.14	HOMER1
ENSG00000177034.14	MTX3
ENSG00000249042.5	CTD-2015H6.3
ENSG00000189127.7	ANKRD34B
ENSG00000113318.9	MSH3
ENSG00000145687.16	SSBP2
ENSG00000186468.12	RPS23
ENSG00000174695.9	TMEM167A
ENSG00000038427.15	VCAN
ENSG00000127184.11	COX7C
ENSG00000245526.9	LINC00461
ENSG00000081189.14	MEF2C
ENSG00000164199.15	ADGRV1
ENSG00000113391.17	FAM172A
ENSG00000175471.19	MCTP1
ENSG00000164292.12	RHOBTB3
ENSG00000118985.15	ELL2
ENSG00000145721.11	LIX1
ENSG00000174136.11	RGMB
ENSG00000174132.8	FAM174A
ENSG00000145730.20	PAM
ENSG00000145743.15	FBXL17
ENSG00000198961.9	PJA2
ENSG00000164209.16	SLC25A46
ENSG00000152495.10	CAMK4
ENSG00000164211.12	STARD4
ENSG00000224032.6	EPB41L4A-AS1
ENSG00000134982.16	APC
ENSG00000153037.13	SRP19
ENSG00000129625.12	REEP5
ENSG00000145780.7	FEM1C
ENSG00000134970.13	TMED7
ENSG00000129596.4	CDO1
ENSG00000177879.14	AP3S1
ENSG00000185641.6	CTD-2287O16.1
ENSG00000283498.1	MIR1244-2
ENSG00000133835.14	HSD17B4
ENSG00000205302.6	SNX2
ENSG00000151292.17	CSNK1G3
ENSG00000155324.9	GRAMD3
ENSG00000279118.1	RP11-517I3.2
ENSG00000164902.13	PHAX
ENSG00000145794.16	MEGF10
ENSG00000066583.11	ISOC1
ENSG00000145808.8	ADAMTS19
ENSG00000169567.11	HINT1
ENSG00000158985.13	CDC42SE2
ENSG00000217128.11	FNIP1
ENSG00000164398.12	ACSL6
ENSG00000113522.13	RAD50
ENSG00000131437.15	KIF3A
ENSG00000164402.13	SEPT8
ENSG00000198944.5	SOWAHA
ENSG00000164405.10	UQCRQ
ENSG00000072364.12	AFF4
ENSG00000170606.13	HSPA4
ENSG00000053108.16	FSTL4
ENSG00000213585.10	VDAC1
ENSG00000113558.18	SKP1
ENSG00000113575.9	PPP2CA
ENSG00000119048.7	UBE2B
ENSG00000237190.3	CDKN2AIPNL
ENSG00000043143.20	JADE2
ENSG00000164615.4	CAMLG
ENSG00000181904.8	C5orf24
ENSG00000113621.14	TXNDC15
ENSG00000145824.12	CXCL14
ENSG00000152377.13	SPOCK1
ENSG00000177733.6	HNRNPA0
ENSG00000031003.10	FAM13B
ENSG00000120733.13	KDM3B
ENSG00000132563.15	REEP2
ENSG00000120738.7	EGR1
ENSG00000120705.12	ETF1
ENSG00000113013.12	HSPA9
ENSG00000044115.20	CTNNA1
ENSG00000146006.7	LRRTM2
ENSG00000120727.12	PAIP2
ENSG00000170464.9	DNAJC18
ENSG00000131508.15	UBE2D2
ENSG00000146005.3	PSD2
ENSG00000185129.5	PURA
ENSG00000182700.4	IGIP
ENSG00000120306.9	CYSTM1
ENSG00000113068.9	PFDN1
ENSG00000131495.8	NDUFA2
ENSG00000113141.16	IK
ENSG00000170445.12	HARS
ENSG00000146007.10	ZMAT2
ENSG00000178913.7	TAF7
ENSG00000240184.6	PCDHGC3
ENSG00000240764.3	PCDHGC5
ENSG00000131504.15	DIAPH1
ENSG00000164620.8	RELL2
ENSG00000156453.13	PCDH1
ENSG00000013561.17	RNF14
ENSG00000113552.15	GNPDA1
ENSG00000131507.10	NDFIP1
ENSG00000113578.17	FGF1
ENSG00000145819.15	ARHGAP26
ENSG00000113580.14	NR3C1
ENSG00000145817.16	YIPF5
ENSG00000183775.10	KCTD16
ENSG00000156463.17	SH3RF2
ENSG00000133706.17	LARS
ENSG00000156475.18	PPP2R2B
ENSG00000113657.12	DPYSL3
ENSG00000164270.17	HTR4
ENSG00000173210.19	ABLIM3
ENSG00000155846.16	PPARGC1B
ENSG00000214485.6	RPL7P1
ENSG00000070808.15	CAMK2A
ENSG00000164587.11	RPS14
ENSG00000070614.14	NDST1
ENSG00000171992.12	SYNPO
ENSG00000132912.12	DCTN4
ENSG00000211445.11	GPX3
ENSG00000197043.13	ANXA6
ENSG00000196743.8	GM2A
ENSG00000113140.10	SPARC
ENSG00000177556.11	ATOX1
ENSG00000155511.17	GRIA1
ENSG00000164576.11	SAP30L
ENSG00000155506.16	LARP1
ENSG00000055163.19	CYFIP2
ENSG00000113282.13	CLINT1
ENSG00000145860.11	RNF145
ENSG00000164332.7	UBLCP1
ENSG00000113312.10	TTC1
ENSG00000170231.15	FABP6
ENSG00000164609.9	SLU7
ENSG00000145864.12	GABRB2
ENSG00000022355.16	GABRA1
ENSG00000113327.14	GABRG2
ENSG00000038274.16	MAT2B
ENSG00000145934.16	TENM2
ENSG00000113645.14	WWC1
ENSG00000113643.8	RARS
ENSG00000188573.7	FBLL1
ENSG00000120137.6	PANK3
ENSG00000182132.13	KCNIP1
ENSG00000181163.13	NPM1
ENSG00000072803.17	FBXW11
ENSG00000168246.5	UBTD2
ENSG00000253683.1	CTB-79E8.3
ENSG00000120129.5	DUSP1
ENSG00000037241.7	RPL26L1
ENSG00000113732.8	ATP6V0E1
ENSG00000145919.10	BOD1
ENSG00000113742.12	CPEB4
ENSG00000170091.10	HMP19
ENSG00000184845.3	DRD1
ENSG00000164466.12	SFXN1
ENSG00000113749.7	HRH2
ENSG00000145920.14	CPLX2
ENSG00000122203.14	KIAA1191
ENSG00000146066.2	HIGD2A
ENSG00000175416.12	CLTB
ENSG00000074317.10	SNCB
ENSG00000113763.10	UNC5A
ENSG00000165671.18	NSD1
ENSG00000169230.9	PRELID1
ENSG00000169223.14	LMAN2
ENSG00000169220.17	RGS14
ENSG00000113758.13	DBN1
ENSG00000183258.11	DDX41
ENSG00000184840.11	TMED9
ENSG00000145912.8	NHP2
ENSG00000197451.11	HNRNPAB
ENSG00000169045.17	HNRNPH1
ENSG00000127022.14	CANX
ENSG00000161011.19	SQSTM1
ENSG00000197226.12	TBC1D9B
ENSG00000050748.17	MAPK9
ENSG00000278970.1	HEIH
ENSG00000250222.1	CTC-338M12.5
ENSG00000204628.11	RACK1
ENSG00000112685.13	EXOC2
ENSG00000124535.15	WRNIP1
ENSG00000124570.17	SERPINB6
ENSG00000137267.5	TUBB2A
ENSG00000137285.9	TUBB2B
ENSG00000145945.5	FAM50B
ENSG00000153046.17	CDYL
ENSG00000124802.11	EEF1E1
ENSG00000111843.13	TMEM14C
ENSG00000197977.3	ELOVL2
ENSG00000224531.5	SMIM13
ENSG00000205269.5	TMEM170B
ENSG00000212802.4	RPL15P3
ENSG00000112137.17	PHACTR1
ENSG00000145990.10	GFOD1
ENSG00000225921.6	NOL7
ENSG00000010017.12	RANBP9
ENSG00000047579.19	DTNBP1
ENSG00000124788.17	ATXN1
ENSG00000112186.11	CAP2
ENSG00000137414.5	FAM8A1
ENSG00000137364.4	TPMT
ENSG00000172201.11	ID4
ENSG00000152954.11	NRSN1
ENSG00000112294.12	ALDH5A1
ENSG00000111802.13	TDP2
ENSG00000112308.12	C6orf62
ENSG00000111913.16	FAM65B
ENSG00000079691.17	LRRC16A
ENSG00000275714.1	HIST1H3A
ENSG00000278637.1	HIST1H4A
ENSG00000278705.1	HIST1H4B
ENSG00000187837.3	HIST1H1C
ENSG00000197061.4	HIST1H4C
ENSG00000180596.7	HIST1H2BC
ENSG00000180573.9	HIST1H2AC
ENSG00000168298.6	HIST1H1E
ENSG00000158373.8	HIST1H2BD
ENSG00000277157.1	HIST1H4D
ENSG00000276966.2	HIST1H4E
ENSG00000273802.2	HIST1H2BG
ENSG00000277075.2	HIST1H2AE
ENSG00000274618.1	HIST1H4F
ENSG00000158406.4	HIST1H4H
ENSG00000182952.4	HMGN4
ENSG00000146109.4	ABT1
ENSG00000197903.7	HIST1H2BK
ENSG00000204789.4	ZNF204P
ENSG00000197238.4	HIST1H4J
ENSG00000273542.1	HIST1H4K
ENSG00000269293.2	ZSCAN16-AS1
ENSG00000263426.2	RN7SL471P
ENSG00000204681.10	GABBR1
ENSG00000206503.11	HLA-A
ENSG00000204619.7	PPP1R11
ENSG00000204592.8	HLA-E
ENSG00000204590.12	GNL1
ENSG00000204574.12	ABCF1
ENSG00000204568.11	MRPS18B
ENSG00000196230.12	TUBB
ENSG00000137312.14	FLOT1
ENSG00000204525.15	HLA-C
ENSG00000234745.9	HLA-B
ENSG00000213760.10	ATP6V1G2
ENSG00000204469.12	PRRC2A
ENSG00000204463.12	BAG6
ENSG00000204396.10	VWA7
ENSG00000204392.10	LSM2
ENSG00000204387.12	C6orf48
ENSG00000204371.11	EHMT2
ENSG00000204356.12	NELFE
ENSG00000204314.10	PRRT1
ENSG00000204310.11	AGPAT1
ENSG00000204308.7	RNF5
ENSG00000204256.12	BRD2
ENSG00000204227.4	RING1
ENSG00000231500.6	RPS18
ENSG00000204220.10	PFDN6
ENSG00000237441.9	RGL2
ENSG00000231925.11	TAPBP
ENSG00000236104.2	ZBTB22
ENSG00000112511.17	PHF1
ENSG00000112514.15	CUTA
ENSG00000197283.13	SYNGAP1
ENSG00000137288.9	UQCC2
ENSG00000124493.13	GRM4
ENSG00000137309.19	HMGA1
ENSG00000272325.1	NUDT3
ENSG00000124507.10	PACSIN1
ENSG00000196821.9	C6orf106
ENSG00000124562.9	SNRPC
ENSG00000064995.16	TAF11
ENSG00000198755.10	RPL10A
ENSG00000112081.16	SRSF3
ENSG00000124772.11	CPNE5
ENSG00000137168.7	PPIL1
ENSG00000198663.16	C6orf89
ENSG00000137409.19	MTCH1
ENSG00000226976.3	COX6A1P2
ENSG00000198937.8	CCDC167
ENSG00000156639.11	ZFAND3
ENSG00000183826.16	BTBD9
ENSG00000124767.6	GLO1
ENSG00000001167.14	NFYA
ENSG00000269387.1	RP11-298J23.8
ENSG00000112576.12	CCND3
ENSG00000048544.5	MRPS10
ENSG00000124496.12	TRERF1
ENSG00000124659.6	TBCC
ENSG00000146223.14	RPL7L1
ENSG00000221821.3	C6orf226
ENSG00000137161.16	CNPY3
ENSG00000112640.14	PPP2R5D
ENSG00000124733.3	MEA1
ENSG00000124702.17	KLHDC3
ENSG00000124541.6	RRP36
ENSG00000112651.11	MRPL2
ENSG00000112667.12	DNPH1
ENSG00000146216.11	TTBK1
ENSG00000204052.4	LRRC73
ENSG00000137207.11	YIPF3
ENSG00000096080.11	MRPS18A
ENSG00000180992.6	MRPL14
ENSG00000137216.18	TMEM63B
ENSG00000112759.16	SLC29A1
ENSG00000096384.19	HSP90AB1
ENSG00000178233.17	TMEM151B
ENSG00000112796.9	ENPP5
ENSG00000172348.14	RCAN2
ENSG00000153291.15	SLC25A27
ENSG00000146072.6	TNFRSF21
ENSG00000146085.7	MUT
ENSG00000197261.11	C6orf141
ENSG00000170915.8	PAQR8
ENSG00000096092.5	TMEM14A
ENSG00000170899.10	GSTA4
ENSG00000112146.16	FBXO9
ENSG00000012660.13	ELOVL5
ENSG00000151914.19	DST
ENSG00000151917.17	BEND6
ENSG00000168116.13	KIAA1586
ENSG00000279892.1	AL356135.1
ENSG00000250686.2	RP1-240B8.3
ENSG00000112245.9	PTP4A1
ENSG00000118482.11	PHF3
ENSG00000135298.13	ADGRB3
ENSG00000168216.10	LMBRD1
ENSG00000154079.5	SDHAF4
ENSG00000112305.14	SMAP1
ENSG00000119900.7	OGFRL1
ENSG00000079841.18	RIMS1
ENSG00000185760.15	KCNQ5
ENSG00000235174.1	RPL39P3
ENSG00000156508.17	EEF1A1
ENSG00000112695.11	COX7A2
ENSG00000112697.15	TMEM30A
ENSG00000112701.17	SENP6
ENSG00000196586.13	MYO6
ENSG00000135312.6	HTR1B
ENSG00000146247.13	PHIP
ENSG00000118418.14	HMGN3
ENSG00000198478.7	SH3BGRL2
ENSG00000118402.5	ELOVL4
ENSG00000146242.8	TPBG
ENSG00000065833.8	ME1
ENSG00000065609.14	SNAP91
ENSG00000135318.11	NT5E
ENSG00000188994.12	ZNF292
ENSG00000135334.8	AKIRIN2
ENSG00000118432.12	CNR1
ENSG00000146278.10	PNRC1
ENSG00000198833.6	UBE2J1
ENSG00000025039.14	RRAGD
ENSG00000112159.11	MDN1
ENSG00000135333.13	EPHA7
ENSG00000172461.10	FUT9
ENSG00000112218.8	GPR63
ENSG00000123545.5	NDUFAF4
ENSG00000184486.9	POU3F2
ENSG00000132423.11	COQ3
ENSG00000164418.19	GRIK2
ENSG00000130347.12	RTN4IP1
ENSG00000112333.11	NR2E1
ENSG00000112335.14	SNX3
ENSG00000118689.14	FOXO3
ENSG00000118690.12	ARMC2
ENSG00000080546.13	SESN1
ENSG00000112367.10	FIG4
ENSG00000146360.8	GPR6
ENSG00000112290.12	WASF1
ENSG00000168438.14	CDC40
ENSG00000203797.9	DDO
ENSG00000155111.14	CDK19
ENSG00000123505.15	AMD1
ENSG00000155115.6	GTF3C6
ENSG00000010810.17	FYN
ENSG00000203778.7	FAM229B
ENSG00000277443.2	MARCKS
ENSG00000196591.11	HDAC2
ENSG00000249853.7	HS3ST5
ENSG00000187189.10	TSPYL4
ENSG00000189241.6	TSPYL1
ENSG00000196376.10	SLC35F1
ENSG00000230202.1	RP11-632C17__A.1
ENSG00000111875.7	ASF1A
ENSG00000111885.6	MAN1A1
ENSG00000152661.7	GJA1
ENSG00000279453.1	RP3-425C14.4
ENSG00000111897.6	SERINC1
ENSG00000146352.12	CLVS2
ENSG00000111907.20	TPD52L1
ENSG00000111912.19	NCOA7
ENSG00000111911.6	HINT3
ENSG00000118518.15	RNF146
ENSG00000093144.18	ECHDC1
ENSG00000079819.17	EPB41L2
ENSG00000146409.10	SLC18B1
ENSG00000112306.7	RPS12
ENSG00000118515.11	SGK1
ENSG00000171408.13	PDE7B
ENSG00000029363.15	BCLAF1
ENSG00000135525.18	MAP7
ENSG00000197442.9	MAP3K5
ENSG00000027697.13	IFNGR1
ENSG00000112379.8	ARFGEF3
ENSG00000024862.17	CCDC28A
ENSG00000146386.7	ABRACL
ENSG00000009844.15	VTA1
ENSG00000010818.8	HIVEP2
ENSG00000169976.6	SF3B5
ENSG00000152818.18	UTRN
ENSG00000164506.14	STXBP5
ENSG00000111961.17	SASH1
ENSG00000111962.7	UST
ENSG00000055208.18	TAB2
ENSG00000131013.3	PPIL4
ENSG00000055211.12	GINM1
ENSG00000120265.16	PCMT1
ENSG00000120256.9	LRP11
ENSG00000131016.16	AKAP12
ENSG00000146476.10	ARMT1
ENSG00000131018.22	SYNE1
ENSG00000074706.13	IPCEF1
ENSG00000213079.9	SCAF8
ENSG00000130340.15	SNX9
ENSG00000272047.1	GTF2H5
ENSG00000130338.12	TULP4
ENSG00000146433.8	TMEM181
ENSG00000278571.1	MIR7161
ENSG00000092820.17	EZR
ENSG00000120437.8	ACAT2
ENSG00000120438.11	TCP1
ENSG00000112110.9	MRPL18
ENSG00000185345.18	PARK2
ENSG00000112531.16	QKI
ENSG00000112541.13	PDE10A
ENSG00000060762.18	MPC1
ENSG00000071242.11	RPS6KA2
ENSG00000164488.11	DACT2
ENSG00000112562.18	SMOC2
ENSG00000185127.6	C6orf120
ENSG00000130024.14	PHF10
ENSG00000112584.13	FAM120B
ENSG00000008018.8	PSMB1
ENSG00000188191.14	PRKAR1B
ENSG00000178381.11	ZFAND2A
ENSG00000157778.8	PSMG3
ENSG00000122687.17	MRM2
ENSG00000146535.13	GNA12
ENSG00000136297.14	MMD2
ENSG00000155034.18	FBXL18
ENSG00000075624.13	ACTB
ENSG00000075618.17	FSCN1
ENSG00000011275.18	RNF216
ENSG00000086232.12	EIF2AK1
ENSG00000136238.17	RAC1
ENSG00000136247.14	ZDHHC4
ENSG00000198580.7	RP11-611L7.2
ENSG00000106399.11	RPA3
ENSG00000003147.17	ICA1
ENSG00000189043.9	NDUFA4
ENSG00000106443.15	PHF14
ENSG00000005108.15	THSD7A
ENSG00000122644.12	ARL4A
ENSG00000006468.13	ETV1
ENSG00000136267.13	DGKB
ENSG00000106524.8	ANKMY2
ENSG00000136261.14	BZW2
ENSG00000106537.7	TSPAN13
ENSG00000213860.4	RPL21P75
ENSG00000105855.9	ITGB8
ENSG00000136237.18	RAPGEF5
ENSG00000196683.10	TOMM7
ENSG00000164548.10	TRA2A
ENSG00000122585.7	NPY
ENSG00000105926.15	MPP6
ENSG00000172115.8	CYCS
ENSG00000122566.20	HNRNPA2B1
ENSG00000122565.18	CBX3
ENSG00000086300.15	SNX10
ENSG00000233830.2	EIF4HP1
ENSG00000106052.13	TAX1BP1
ENSG00000153814.11	JAZF1
ENSG00000255690.2	TRIL
ENSG00000106066.14	CPVL
ENSG00000122574.10	WIPF3
ENSG00000136193.16	SCRN1
ENSG00000180354.15	MTURN
ENSG00000106105.13	GARS
ENSG00000078549.14	ADCYAP1R1
ENSG00000122545.18	SEPT7
ENSG00000086289.11	EPDR1
ENSG00000006715.15	VPS41
ENSG00000006451.7	RALA
ENSG00000106591.3	MRPL32
ENSG00000002746.14	HECW1
ENSG00000106624.9	AEBP1
ENSG00000106636.7	YKT6
ENSG00000058404.19	CAMK2B
ENSG00000015676.17	NUDCD3
ENSG00000158604.14	TMED4
ENSG00000105953.14	OGDH
ENSG00000122515.14	ZMIZ2
ENSG00000196262.13	PPIA
ENSG00000105968.18	H2AFV
ENSG00000146676.7	PURB
ENSG00000136280.15	CCM2
ENSG00000164742.14	ADCY1
ENSG00000136205.16	TNS3
ENSG00000106070.17	GRB10
ENSG00000170419.10	VSTM2A
ENSG00000132432.13	SEC61G
ENSG00000146648.16	EGFR
ENSG00000132434.9	LANCL2
ENSG00000146729.9	GBAS
ENSG00000146731.10	CCT6A
ENSG00000129103.17	SUMF2
ENSG00000106153.12	CHCHD2
ENSG00000173041.11	ZNF680
ENSG00000197008.9	ZNF138
ENSG00000196715.5	VKORC1L1
ENSG00000241258.6	CRCP
ENSG00000237310.1	GS1-124K5.4
ENSG00000275400.1	RP4-756H11.5
ENSG00000232559.3	GS1-124K5.12
ENSG00000272831.1	RP11-792A8.4
ENSG00000106609.16	TMEM248
ENSG00000126524.9	SBDS
ENSG00000185274.11	WBSCR17
ENSG00000183166.10	CALN1
ENSG00000225648.5	SBDSP1
ENSG00000009954.10	BAZ1B
ENSG00000106635.7	BCL7B
ENSG00000106683.14	LIMK1
ENSG00000106682.14	EIF4H
ENSG00000106665.15	CLIP2
ENSG00000274070.1	GATSL2
ENSG00000276840.1	PMS2P10
ENSG00000005486.16	RHBDD2
ENSG00000189077.10	TMEM120A
ENSG00000146701.11	MDH2
ENSG00000177679.15	SRRM3
ENSG00000170027.6	YWHAG
ENSG00000135211.5	TMEM60
ENSG00000153956.15	CACNA2D1
ENSG00000186472.19	PCLO
ENSG00000198822.10	GRM3
ENSG00000105784.15	RUNDC3B
ENSG00000075303.12	SLC25A40
ENSG00000008277.14	ADAM22
ENSG00000075142.13	SRI
ENSG00000157214.13	STEAP2
ENSG00000157224.15	CLDN12
ENSG00000058091.16	CDK14
ENSG00000127914.16	AKAP9
ENSG00000001629.9	ANKIB1
ENSG00000127995.16	CASD1
ENSG00000127990.15	SGCE
ENSG00000242265.5	PEG10
ENSG00000158528.11	PPP1R9A
ENSG00000105854.12	PON2
ENSG00000158560.14	DYNC1I1
ENSG00000006128.11	TAC1
ENSG00000070669.16	ASNS
ENSG00000164715.5	LMTK2
ENSG00000214389.2	RPS3AP26
ENSG00000166448.14	TMEM130
ENSG00000241685.8	ARPC1A
ENSG00000106244.12	PDAP1
ENSG00000106245.9	BUD31
ENSG00000241468.7	ATP5J2
ENSG00000106261.16	ZKSCAN1
ENSG00000168090.9	COPS6
ENSG00000188186.10	LAMTOR4
ENSG00000239521.7	GATS
ENSG00000146834.13	MEPCE
ENSG00000166925.8	TSC22D4
ENSG00000166924.8	NYAP1
ENSG00000077080.9	ACTL6B
ENSG00000172354.9	GNB2
ENSG00000172336.4	POP7
ENSG00000087085.13	ACHE
ENSG00000106367.13	AP1S1
ENSG00000106400.11	ZNHIT1
ENSG00000214253.8	FIS1
ENSG00000128581.15	IFT22
ENSG00000160991.15	ORAI2
[truncated: 2,918 more rows]
