# Supplementary material for: Genetic and environmental regulation of caudate nucleus transcriptome: insight into schizophrenia risk and the dopamine system
Source: bioRxiv or medRxiv preprint supplement (doi:10.1101/2020.11.18.20230540), 2021-04-29
Supplement: Supplementary file [file media-4.gz]

## Module 9

gene silencing by miRNA

mRNA binding involved in posttranscription...

geneRatio

10.25

10.50

10.75

11.00

5

10

15

$-\log_{10}(\text{FDR})$
