# Supplementary material for: Genetic and environmental regulation of caudate nucleus transcriptome: insight into schizophrenia risk and the dopamine system
Source: bioRxiv or medRxiv preprint supplement (doi:10.1101/2020.11.18.20230540), 2021-04-29

## Module 5

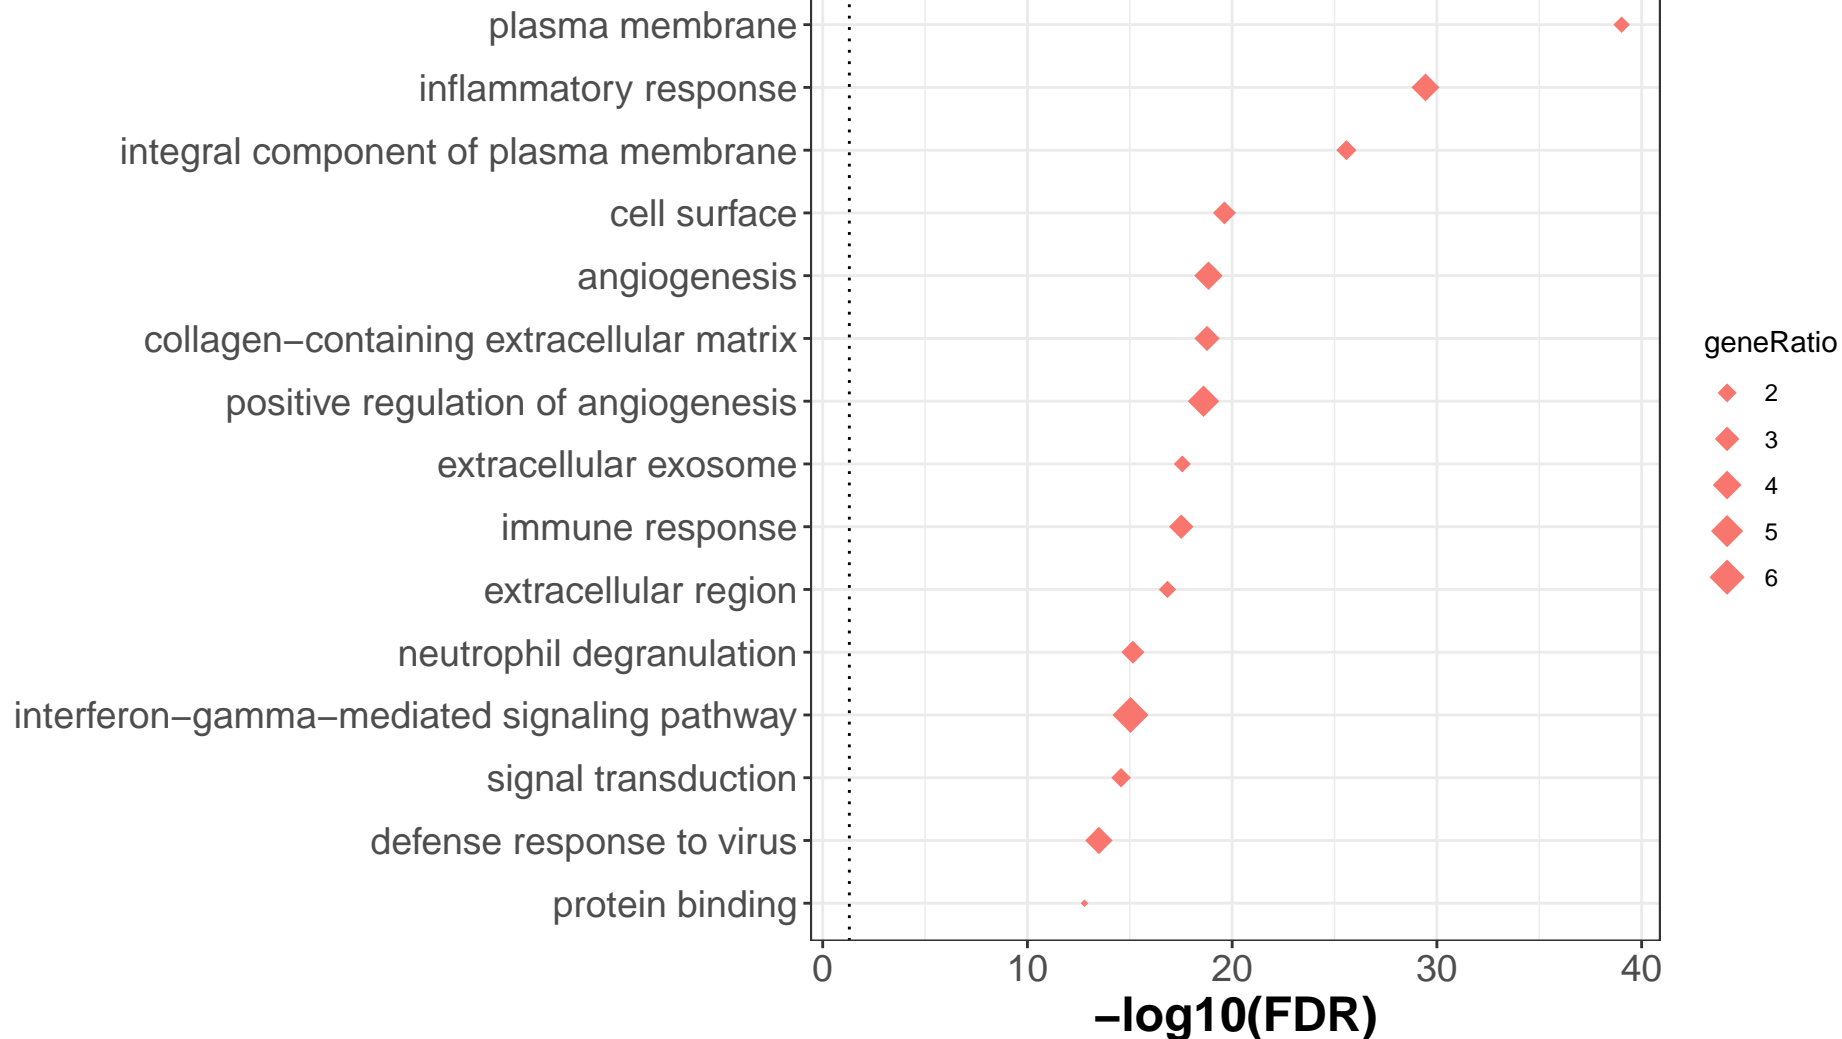

Supplement: Supplementary file [file media-4.gz]
