# Supplementary material for: Genetic and environmental regulation of caudate nucleus transcriptome: insight into schizophrenia risk and the dopamine system
Source: bioRxiv or medRxiv preprint supplement (doi:10.1101/2020.11.18.20230540), 2021-04-29
Supplement: Supplementary file [file media-4.gz]

## Module 7

gene silencing by miRNA

negative regulation of receptor signaling ...

negative regulation of interleukin-6-media...

geneRatio

- 10
- 20
- 30
- 40

2

3

4

$-\log_{10}(\text{FDR})$
