# Supplementary material for: Genetic and environmental regulation of caudate nucleus transcriptome: insight into schizophrenia risk and the dopamine system
Source: bioRxiv or medRxiv preprint supplement (doi:10.1101/2020.11.18.20230540), 2021-04-29

## Module 11

extracellular matrix structural constituent

collagen-containing extracellular matrix

extracellular matrix

geneRatio

4

5

6

1.6

2.0

2.4

$-\log_{10}(\text{FDR})$

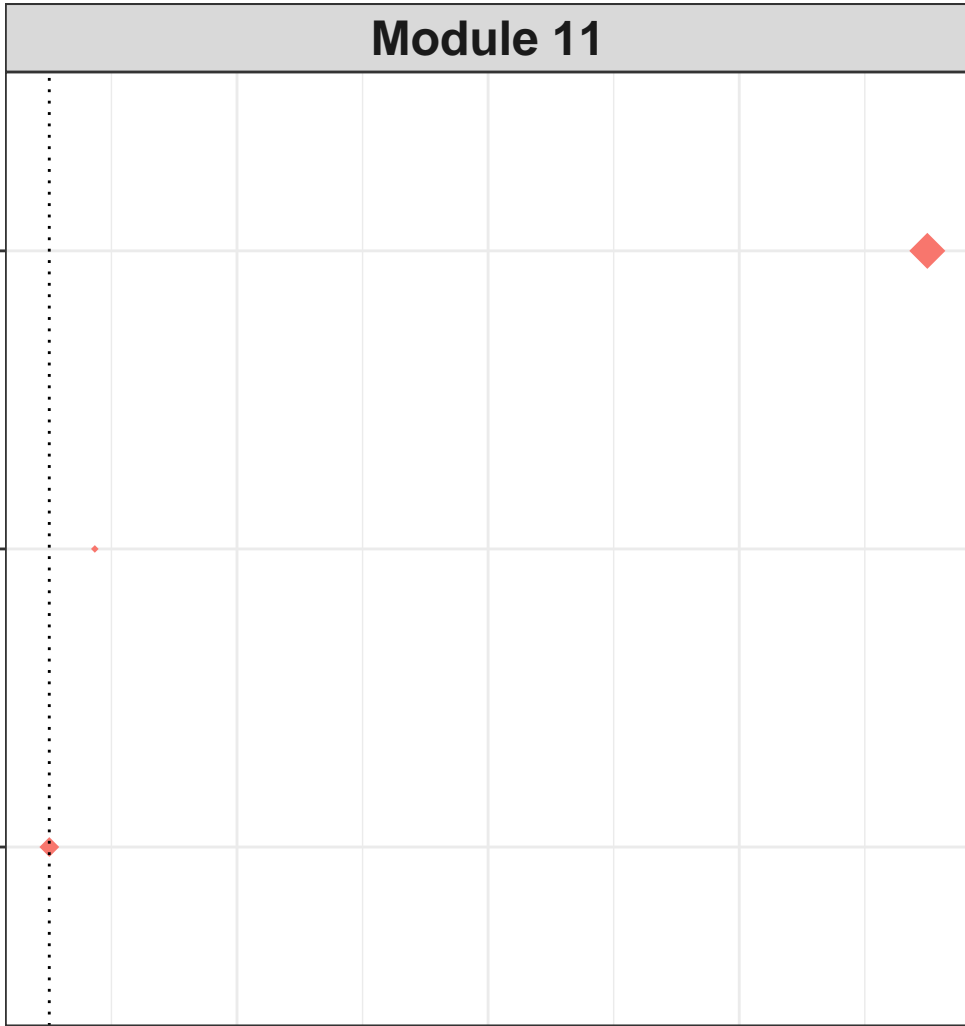

Supplement: Supplementary file [file media-4.gz]
