# Supplementary material for: Genetic and environmental regulation of caudate nucleus transcriptome: insight into schizophrenia risk and the dopamine system
Source: bioRxiv or medRxiv preprint supplement (doi:10.1101/2020.11.18.20230540), 2021-04-29

## Module 12

tRNA modification

MCM complex

geneRatio

- 14
- 16
- 18

1.3

1.4

1.5

1.6

1.7

$-\log_{10}(\text{FDR})$

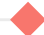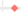

Supplement: Supplementary file [file media-4.gz]
